# Supplementary material for: Development of oxetane modified building blocks for peptide synthesis
Source: Royal Society of Chemistry journal article supplement (doi:10.1039/d0ob01208d), 2020-01-01

# Development of Oxetane Modified Building Blocks for Peptide Synthesis

Stefan Roesner, Jonathan D. Beadle, Leo K. B. Tam, Ina Wilkening, Guy J. Clarkson,  
Piotr Raubo and Michael Shipman

*Department of Chemistry, University of Warwick, Gibbet Hill Road, Coventry, CV4 7AL,  
U.K.*

*E-mail: [M.Shipman@warwick.ac.uk](mailto:M.Shipman@warwick.ac.uk)*

## Table of Contents

|                                                                               |     |
|-------------------------------------------------------------------------------|-----|
| 1. General experimental information                                           | S2  |
| 2. Synthesis and characterisation of oxetane modified alanine building blocks | S3  |
| 3. Solid phase peptide synthesis                                              | S12 |
| 4. General procedures                                                         | S18 |
| 5. Synthesis and characterisation of oxetane modified glycine building blocks | S21 |
| 5.1 Synthesis of Fmoc-GOx-Glu( <i>t</i> Bu)-OCumyl                            | S21 |
| 5.2 Synthesis of Fmoc-GOx-Ile-OCumyl                                          | S22 |
| 5.3 Synthesis of Fmoc-GOx-Leu-OCumyl                                          | S24 |
| 5.4 Synthesis of Fmoc-GOx-Asn(Trt)OCumyl                                      | S25 |
| 5.5 Synthesis of Fmoc-GOx-Gln(Trt)-OCumyl                                     | S27 |
| 5.6 Synthesis of Fmoc-GOx-Trp(Boc)-OCumyl                                     | S28 |
| 5.7 Synthesis of Fmoc-GOx-Tyr( <i>t</i> Bu)-OCumyl                            | S30 |
| 5.8 Synthesis of Fmoc-GOx-Cys(Trt)-OCumyl                                     | S31 |
| 5.9 Synthesis of Fmoc-GOx-Met-OCumyl                                          | S33 |
| 5.10 Synthesis of Fmoc-GOx-His(Trt)-OCumyl                                    | S34 |
| 5.11 Synthesis of Fmoc-GOx-Ser(Trt)-OBn                                       | S36 |
| 5.12 Synthesis of Fmoc-GOx-Thr(Trt)-OBn                                       | S37 |
| 5.13 Synthesis of Fmoc-GOx-His(Trt)-OBn                                       | S38 |
| 6. Peptide couplings of selected oxetane modified glycine building blocks     | S39 |
| 7. References                                                                 | S41 |
| 8. <sup>1</sup> H NMR and <sup>13</sup> C NMR spectra                         | S42 |

## 1. General experimental information

Reaction mixtures were stirred magnetically. All chemicals were purchased from Acros Organics, Alfa Aesar, Fluorochem or Sigma-Aldrich and used as received unless otherwise mentioned. Anhydrous solvents were purchased from Sigma-Aldrich or Acros Organics in Sure-Seal™ bottles. All other solvents were reagent grade and used as received. Petroleum ether (PE) refers to the fraction that boils in the range of 40–60 °C. All amino acids are of *L*-configuration unless otherwise stated. Fmoc-Ala-OCumyl,<sup>1</sup> NO<sub>2</sub>-GOx-Thr(*t*Bu)-OCumyl<sup>1</sup> and 3-(1-nitroethylidene)oxetane (**5**)<sup>2</sup> were prepared following known literature procedures.

<sup>1</sup>H Nuclear Magnetic Resonance (NMR) spectra were recorded in CDCl<sub>3</sub> on a Bruker HD300 (300 MHz), HD400 (400 MHz), AV500 (500 MHz) or AV600 (600 MHz) Fourier transform spectrometer. Chemical shifts ( $\delta_{\text{H}}$ ) are quoted in parts per million (ppm) and referred to the residual protic solvent signal of CDCl<sub>3</sub> (7.26 ppm). <sup>1</sup>H NMR coupling constants (*J*) are reported in hertz (Hz) and refer to apparent multiplicities. Data are reported as follows: chemical shift, multiplicity (s = singlet, br. s = broad singlet, d = doublet, t = triplet, q = quartet, quint = quintet, m = multiplet, dd = doublet of doublet, etc.), coupling constant, integration, and assignment. <sup>13</sup>C NMR spectra were recorded at 101, 126 or 151 MHz. Chemical shifts ( $\delta_{\text{C}}$ ) are quoted in ppm referenced to CDCl<sub>3</sub> (77.16 ppm). NMR assignments were deduced using 2D experiments (COSY, HSQC and HMBC).

Low-resolution mass spectra were recorded on an Agilent 6130B single Quad (ESI) instrument. High-resolution mass spectra were recorded using a Bruker MaXis Impact. All infrared spectra were recorded on the neat compounds using a Bruker ALPHA-Platinum FTIR spectrometer, irradiating between 4000 cm<sup>-1</sup> and 600 cm<sup>-1</sup>. Only strong and selected absorbances ( $\nu_{\text{max}}$ ) are reported. Analytical TLC was performed on aluminium backed silica plates (Merck, Silica Gel 60 F<sub>254</sub>, 0.25 mm). Compounds were visualised by fluorescence quenching or by staining the plates with 5% solution of phosphomolybdic acid (H<sub>3</sub>PMo<sub>12</sub>O<sub>40</sub>) in EtOH or 1% solution of potassium permanganate (KMnO<sub>4</sub>) in water followed by heating. Flash column chromatography was performed on silica gel (Aldrich, Silica Gel 60, 40–63  $\mu\text{m}$ ). All mixed solvent eluents are reported as v/v solutions. Optical rotations were obtained using an AA-1000 polarimeter at 589 nm (Na D-line) in a cell with a path length of 2 dm. Specific rotation values are given in (deg mL)/(g dm). Melting points were measured with a Gallenkamp melting point apparatus.

## 2. Synthesis and characterisation of oxetane modified alanine building blocks

### 2-Phenylpropan-2-yl [3-((±)-1-nitroethyl)oxetan-3-yl]-L-alaninate (7)

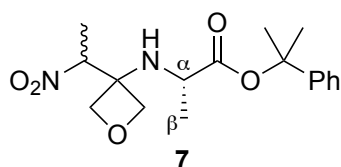

Fmoc-Ala-OCumyl<sup>1</sup> (976 mg, 2.27 mmol, 1.5 equiv) in 50% diethylamine in CH<sub>2</sub>Cl<sub>2</sub> (5.0 mL) was stirred at room temperature for 1 h. The reaction mixture was concentrated under reduced pressure and the resulting residue repeatedly dissolved in CH<sub>2</sub>Cl<sub>2</sub> (3 × 20 mL) and concentrated under reduced pressure to give crude amine **6**. To **6** in CH<sub>2</sub>Cl<sub>2</sub> (7.5 mL) was added 3-(1-nitroethylidene)oxetane (**5**)<sup>2</sup> (196 mg, 1.51 mmol, 1.0 equiv) in CH<sub>2</sub>Cl<sub>2</sub> (7.5 mL). The reaction mixture was stirred at room temperature until consumption of the nitroalkene (<sup>1</sup>H NMR monitoring, 8 h) and then concentrated under reduced pressure to give a crude product which <sup>1</sup>H-NMR showed to consist of a 50:50 mixture of diastereoisomers. Purification by column chromatography (SiO<sub>2</sub>, PE/EtOAc 9:1→4:1) gave **7** (436 mg, 1.30 mmol, 86%) as a colourless oil as a 55:45 mixture of diastereoisomers. **R<sub>f</sub>** (PE/EtOAc 4:1) 0.29; <sup>1</sup>H NMR (500 MHz, CDCl<sub>3</sub>) δ<sub>H</sub> 7.40–7.30 (m, 4H, ArH), 7.30–7.22 (m, 1H, ArH), 4.97–4.86 (m, 1H, NO<sub>2</sub>CH), 4.61–4.57 (m, 1.55H, 2 × major diastereoisomer OCHH-Ox and minor diastereoisomer OCHH-Ox), 4.55 (d, *J* = 7.5 Hz, 1H, OCHH-Ox), 4.48 (d, *J* = 7.6 Hz, 0.45H, minor diastereoisomer OCHH-Ox), 4.45 (d, *J* = 7.6 Hz, 0.45H, minor diastereoisomer OCHH-Ox), 4.41 (d, *J* = 7.8 Hz, 0.55 H, major diastereoisomer OCHH-Ox), 3.79–3.69 (m, 0.45H, minor diastereoisomer CH<sub>α</sub>-Ala), 3.68–3.57 (m, 0.55H, major diastereoisomer CH<sub>α</sub>-Ala), 2.36 (br. s, 0.45H, minor diastereoisomer NH), 2.19 (br. s, 0.55H, major diastereoisomer NH), 1.81–1.77 (m, 6H, 2 × CH<sub>3</sub>, cumyl), 1.68 (d, *J* = 7.1 Hz, 1.35H, minor diastereoisomer NO<sub>2</sub>CHCH<sub>3</sub>), 1.67 (d, *J* = 7.0 Hz, 1.65H, major diastereoisomer NO<sub>2</sub>CHCH<sub>3</sub>), 1.34 (d, *J* = 7.1 Hz, 1.35H, minor diastereoisomer CH<sub>3</sub>β-Ala), 1.32 (d, *J* = 7.1 Hz, 1.65H, major diastereoisomer CH<sub>3</sub>β-Ala); <sup>13</sup>C NMR (126 MHz, CDCl<sub>3</sub>) δ<sub>C</sub> 174.9 (C=O), 174.7 (C=O), 145.1 (C), 128.52 (2 × CH), 128.5 (2 × CH), 127.53 (CH), 127.48 (CH), 124.39 (2 × CH), 124.37 (2 × CH), 86.9 (NO<sub>2</sub>CH), 85.3 (NO<sub>2</sub>CH), 82.83 (C, cumyl), 82.78 (C, cumyl), 78.2 (OCH<sub>2</sub>), 77.9 (OCH<sub>2</sub>), 77.8 (OCH<sub>2</sub>), 76.9 (OCH<sub>2</sub>), 62.6 (C, Ox), 62.2 (C, Ox), 51.9 (CH, α-Ala), 51.7 (CH, α-Ala), 28.52 (CH<sub>3</sub>, cumyl), 28.47 (CH<sub>3</sub>, cumyl), 28.45 (CH<sub>3</sub>, cumyl), 28.3 (CH<sub>3</sub>, cumyl), 21.3 (CH<sub>3</sub>, NO<sub>2</sub>CHCH<sub>3</sub>), 21.0 (CH<sub>3</sub>, NO<sub>2</sub>CHCH<sub>3</sub>), 14.0 (CH<sub>3</sub>, β-Ala), 13.5 (CH<sub>3</sub>, β-Ala); **v<sub>max</sub>** (neat) = 3342 (NH), 2981, 2937, 2883, 1730 (C=O), 1549, 1448, 1366, 1271, 1132, 1101 cm<sup>-1</sup>; **MS** (ESI<sup>+</sup>) *m/z* 359 [M+Na]<sup>+</sup>; **HRMS** (ESI<sup>+</sup>) calcd. for C<sub>17</sub>H<sub>24</sub>N<sub>2</sub>O<sub>5</sub>Na [M+Na]<sup>+</sup> 359.1577, found 359.1571.

### Fmoc-L-AOx-Ala-OCumyl and Fmoc-D-AOx-Ala-OCumyl ((±,*S*)-14)

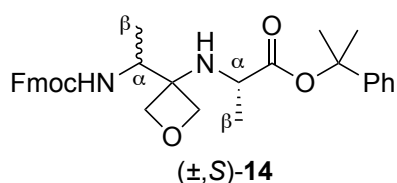

Following general procedure 4, **7** (377 mg, 1.12 mmol, 1.0 equiv, dr 55:45) gave, after column chromatography (SiO<sub>2</sub>, CH<sub>2</sub>Cl<sub>2</sub>/EtOAc 19:1→4:1), (±,*S*)-**14** (467 mg, 0.88 mmol, 79%) as a white solid. HPLC analysis showed a 58:42 mixture of diastereoisomers. **R<sub>f</sub>** (CH<sub>2</sub>Cl<sub>2</sub>/EtOAc 85:5) 0.47; <sup>1</sup>H NMR (500 MHz, CDCl<sub>3</sub>) δ<sub>H</sub> 7.76 (d, *J* = 7.6 Hz, 2H, ArH), 7.63–7.54 (m, 2H, ArH), 7.45–7.20 (m, 9H, ArH), 5.69–4.91 (m, 1H, NH), 4.78–4.02 (m, 8H, CHCH<sub>2</sub>-Fmoc, CH<sub>α</sub>-AOx, 2 × OCH<sub>2</sub>-Ox), 4.01–3.63 (m, 1H, CH<sub>α</sub>-Ala), 1.82 (s, 3H, CH<sub>3</sub>, cumyl), 1.79 (s, 1.8H, major diastereoisomer CH<sub>3</sub>, cumyl), 1.78 (s, 1.2H, minor diastereoisomer CH<sub>3</sub>, cumyl), 1.38

(d,  $J = 6.9$  Hz, 3H, CH<sub>3</sub>β-Ala), 1.23–0.90 (m, 3H, CH<sub>3</sub>β-AOx); <sup>13</sup>C NMR (126 MHz, CDCl<sub>3</sub>) δ<sub>C</sub> 175.6 (2 × C=O), 156.5 (C=O, Fmoc), 156.3 (C=O, Fmoc), 145.17 (C), 145.15 (C), 144.12 (C), 144.09 (C), 144.06 (C), 141.5 (C), 128.53 (CH), 128.48 (CH), 127.82 (CH), 127.79 (CH), 127.49 (CH), 127.47 (CH), 127.2 (CH), 125.36 (CH), 125.27 (CH), 125.19 (CH), 124.4 (CH), 124.3 (CH), 120.12 (CH), 120.08 (CH), 82.80 (C, cumyl), 82.78 (C, cumyl), 79.1 (OCH<sub>2</sub>), 79.0 (OCH<sub>2</sub>), 78.9 (OCH<sub>2</sub>), 77.9 (OCH<sub>2</sub>), 66.8 (CH<sub>2</sub>, Fmoc), 66.7 (CH<sub>2</sub>, Fmoc), 62.5 (C, Ox), 62.4 (C, Ox), 52.1 (CH, α-Ala), 52.0 (CH, Fmoc or α-AOx), 51.2 (CH, α-Ala), 47.5 (CH, Fmoc or α-AOx), 47.4 (CH, Fmoc), 28.8 (CH<sub>3</sub>, cumyl), 28.2 (CH<sub>3</sub>, cumyl), 28.1 (CH<sub>3</sub>, cumyl), 21.7 (CH<sub>3</sub>, β-Ala), 20.8 (CH<sub>3</sub>, β-Ala), 14.9 (CH<sub>3</sub>, β-AOx), 14.6 (CH<sub>3</sub>, β-AOx); ν<sub>max</sub> (neat) = 3330 (NH), 2976, 2940, 2875, 1718 (C=O), 1496, 1448, 1241, 1132, 1101 cm<sup>-1</sup>; MS (ESI<sup>+</sup>)  $m/z$  529 [M+H]<sup>+</sup>, 551 [M+Na]<sup>+</sup>; HRMS (ESI<sup>+</sup>) calcd. for C<sub>32</sub>H<sub>36</sub>N<sub>2</sub>O<sub>5</sub>Na [M+Na]<sup>+</sup> 551.2516, found 551.2515; HPLC (Chiralcel OD-H (0.46 cm × 25 cm, 5 μm), 20% isopropanol in hexane, 25 °C, 1.0 mL/min, λ = 254 nm)  $t_R$  = 54 min (major), 93 min (minor).

### 3-((*R*)-1-Nitroethyl)-*N*-((*S*)-1-phenylethyl)oxetan-3-amine ((*R,S*)-9)

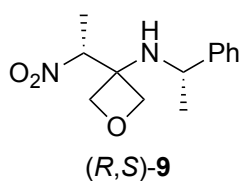

To 3-(1-nitroethylidene)oxetane (**5**)<sup>2</sup> (100 mg, 0.77 mmol, 1.0 equiv) in CH<sub>2</sub>Cl<sub>2</sub> (8.0 mL) was added (*S*)-(-)-α-methylbenzylamine ((*S*)-**8**) (120 μL, 0.93 mmol, 1.2 equiv) and the mixture was stirred at room temperature for 16 h. The reaction mixture was concentrated under reduced pressure to give a crude product which <sup>1</sup>H NMR showed to consist of a 60:40 mixture of diastereoisomers. Purification by column chromatography (SiO<sub>2</sub>, PE/EtOAc 7:1) gave the major diastereoisomer (*R,S*)-**9** (108 mg, 0.43 mmol, 56%, dr >95:5) as a white solid. **R<sub>f</sub>** (PE/EtOAc 4:1) 0.29; **mp** 76–79 °C; <sup>1</sup>H NMR (500 MHz, CDCl<sub>3</sub>) δ<sub>H</sub> 7.39–7.29 (m, 4H, ArH), 7.28–7.21 (m, 1H, ArH), 5.05 (q,  $J = 6.9$  Hz, 1H, NO<sub>2</sub>CH), 4.53 (d,  $J = 7.2$  Hz, 1H, OCHH-Ox), 4.43 (d,  $J = 7.6$  Hz, 1H, OCHH-Ox), 4.41 (d,  $J = 7.6$  Hz, 1H, OCHH-Ox), 4.30–4.22 (m, 2H, OCHH-Ox, NHCH), 1.84 (br. s, 1H, NH), 1.73 (d,  $J = 6.9$  Hz, 3H, NO<sub>2</sub>CHCH<sub>3</sub>), 1.37 (d,  $J = 6.7$  Hz, 3H, NHCHCH<sub>3</sub>); <sup>13</sup>C NMR (126 MHz, CDCl<sub>3</sub>) δ<sub>C</sub> 146.7 (C), 128.9 (CH), 127.4 (CH), 126.3 (CH), 86.2 (NO<sub>2</sub>CH), 77.8 (OCH<sub>2</sub>), 76.9 (OCH<sub>2</sub>), 62.4 (C, Ox), 52.7 (NHCH), 26.3 (NO<sub>2</sub>CHCH<sub>3</sub>), 14.4 (NHCHCH<sub>3</sub>); ν<sub>max</sub> (neat) = 3330 (NH), 2977, 2968, 2925, 2881, 1546, 1389, 1289, 974 cm<sup>-1</sup>; MS (ESI<sup>+</sup>)  $m/z$  251 [M+H]<sup>+</sup>, 273 [M+Na]<sup>+</sup>, 289 [M+K]<sup>+</sup>; HRMS (ESI<sup>+</sup>) calcd. for C<sub>13</sub>H<sub>19</sub>N<sub>2</sub>O<sub>3</sub> [M+H]<sup>+</sup> 251.1390, found 251.1397; [α]<sub>D</sub><sup>18</sup> -10.3 (*c* 0.60, CHCl<sub>3</sub>).

### 3-((*S*)-1-Nitroethyl)-*N*-((*R*)-1-phenylethyl)oxetan-3-amine ((*S,R*)-9)

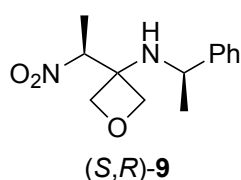

To 3-(1-nitroethylidene)oxetane (**5**)<sup>2</sup> (1.06 g, 8.17 mmol, 1.0 equiv) in CH<sub>2</sub>Cl<sub>2</sub> (82 mL) was added (*R*)-(+)-α-methylbenzylamine ((*R*)-**8**) (1.25 mL, 9.81 mmol, 1.2 equiv) and the mixture was stirred at room temperature for 16 h. The reaction mixture was concentrated under reduced pressure to give a crude product which <sup>1</sup>H NMR showed to consist of 60:40 mixture of diastereoisomers. Purification by column chromatography (SiO<sub>2</sub>, PE/EtOAc 9:1→85:15) gave the major diastereoisomer (*S,R*)-**9** (1.03 g, 4.12 mmol, 50%, dr >95:5) as a white solid. **mp** 71–74 °C; [α]<sub>D</sub><sup>19</sup> +7.9 (*c* 0.19, CHCl<sub>3</sub>). Other analytical data as described for (*R,S*)-**9**.

### Fmoc-D-AOx-NH<sub>2</sub> ((*R*)-10)

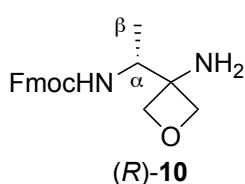

To (*R,S*)-9 (531 mg, 2.12 mmol, 1.0 equiv) in MeOH (21 mL) was added 20% Pd(OH)<sub>2</sub>/C (212 mg). The reaction mixture was stirred under an atmosphere of H<sub>2</sub> (balloon) at room temperature for 4 d. The mixture was filtered through a plug of Celite eluting with MeOH and the filtrate was concentrated under reduced pressure to give the crude diamine. To the crude diamine were added CH<sub>2</sub>Cl<sub>2</sub> (10 mL), NaHCO<sub>3</sub> (356 mg, 4.24 mmol, 2.0 equiv) and Fmoc *N*-hydroxysuccinimide ester (715 mg, 2.12 mmol, 1.0 equiv) and the mixture was stirred at room temperature for 2 h. The reaction mixture was diluted with EtOAc and washed with saturated Na<sub>2</sub>CO<sub>3</sub> (2 × 20 mL) and brine (10 mL), dried over MgSO<sub>4</sub>, filtered and concentrated under reduced pressure. Purification by column chromatography (SiO<sub>2</sub>, EtOAc → CH<sub>2</sub>Cl<sub>2</sub> → CH<sub>2</sub>Cl<sub>2</sub>/MeOH 19:1) gave (*R*)-10 (415 mg, 1.23 mmol, 58%) as a sticky white gum. **R<sub>f</sub>** (CH<sub>2</sub>Cl<sub>2</sub>/MeOH 9:1) 0.44; **<sup>1</sup>H NMR** (500 MHz, CDCl<sub>3</sub>) δ<sub>H</sub> 7.77 (d, *J* = 7.4 Hz, 2H, ArH), 7.59 (d, *J* = 7.4 Hz, 2H, ArH), 7.40 (t, *J* = 7.4 Hz, 2H, ArH), 7.32 (t, *J* = 7.4 Hz, 2H, ArH), 5.13 (d, *J* = 8.2 Hz, 1H, NH), 4.57 (d, *J* = 6.6 Hz, 1H, OCHH-Ox), 4.54 (d, *J* = 6.3 Hz, 1H, OCHH-Ox), 4.49–4.37 (m, 2H, CH<sub>2</sub>-Fmoc), 4.36–4.26 (m, 2H, 2 × OCHH-Ox), 4.26–4.15 (m, 2H, CH-Fmoc, CH<sub>α</sub>-AOx), 1.57 (s, 2H, NH<sub>2</sub>), 1.11 (d, *J* = 6.5 Hz, 3H, CH<sub>3</sub>β-AOx). *N.B.* NH<sub>2</sub> overlapping with H<sub>2</sub>O signal; **<sup>13</sup>C NMR** (126 MHz, CDCl<sub>3</sub>) δ<sub>C</sub> 156.3 (C=O, Fmoc), 144.1 (C), 144.0 (C), 141.5 (C), 127.8 (CH), 127.2 (CH), 125.2 (CH), 125.1 (CH), 120.14 (CH), 120.10 (CH), 83.0 (OCH<sub>2</sub>), 82.4 (OCH<sub>2</sub>), 66.7 (CH<sub>2</sub>, Fmoc), 58.9 (C, Ox), 51.5 (CH, α-AOx), 47.5 (CH, Fmoc), 14.8 (CH<sub>3</sub>, β-AOx). *N.B.* One aromatic C signal not observed; **v<sub>max</sub>** (neat) = 3298 (NH), 2946, 2868, 1700 (C=O), 1529, 1448, 1242, 1050, 970 cm<sup>-1</sup>; **MS** (ESI<sup>+</sup>) *m/z* 339 [M+H]<sup>+</sup>, 361 [M+Na]<sup>+</sup>; **HRMS** (ESI<sup>+</sup>) calcd. for C<sub>18</sub>H<sub>20</sub>N<sub>5</sub>NaO<sub>2</sub> [M+Na]<sup>+</sup> 361.1509, found 361.1511; [α]<sub>D</sub><sup>18</sup> -9.6 (*c* 0.45, CHCl<sub>3</sub>).

### Fmoc-L-AOx-NH<sub>2</sub> ((*S*)-10)

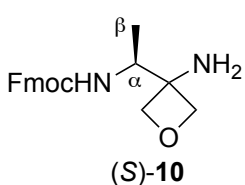

To (*S,R*)-9 (605 mg, 2.42 mmol, 1.0 equiv) in MeOH (24 mL) was added 20% Pd(OH)<sub>2</sub>/C (242 mg). The reaction mixture was stirred under an atmosphere of H<sub>2</sub> (balloon) at room temperature for 4 d. The mixture was filtered through a plug of Celite eluting with MeOH and the filtrate was concentrated under reduced pressure to give the crude diamine. To the crude diamine were added CH<sub>2</sub>Cl<sub>2</sub> (10 mL), NaHCO<sub>3</sub> (407 mg, 4.84 mmol, 2.0 equiv) and Fmoc *N*-hydroxysuccinimide (816 mg, 2.42 mmol, 1.0 equiv) and the mixture was stirred at room temperature for 2 h. The reaction mixture was diluted with EtOAc and washed with saturated Na<sub>2</sub>CO<sub>3</sub> (2 × 20 mL) and brine (10 mL), dried over MgSO<sub>4</sub>, filtered and concentrated under reduced pressure. Purification by column chromatography (SiO<sub>2</sub>, EtOAc → CH<sub>2</sub>Cl<sub>2</sub> → CH<sub>2</sub>Cl<sub>2</sub>/MeOH 19:1) gave (*S*)-10 (407 mg, 1.20 mmol, 50%) as a sticky white gum. [α]<sub>D</sub><sup>22</sup> +7.1 (*c* 0.47, CHCl<sub>3</sub>). Other analytical data as described for (*R*)-10.

## 2-Phenylpropan-2-yl (*S*)-2-hydroxypropanoate ((*S*)-12)

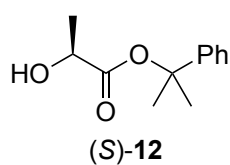

Following general procedure 1, L-lactic acid (1.05 g, 11.6 mmol, 1.0 equiv) gave, after column chromatography (SiO<sub>2</sub>, PE/EtOAc 9:1→85:15), (*S*)-12 (1.47 g, 7.07 mmol, 61%) contaminated with traces of 2-phenyl-2-propanol (~19:1 by <sup>1</sup>H NMR) as a colourless oil. **R<sub>f</sub>** (PE/EtOAc 85:15) 0.30; **<sup>1</sup>H NMR** (500 MHz, CDCl<sub>3</sub>) δ<sub>H</sub> 7.39–7.32 (m, 4H, ArH), 7.31–7.24 (m, 1H, ArH), 4.24 (q, *J* = 6.9 Hz, 1H, CH), 2.76 (br. s, 1H, OH), 1.82 (s, 3H, CH<sub>3</sub>, cumyl), 1.80 (s, 3H, CH<sub>3</sub>, cumyl), 1.45 (d, *J* = 6.9 Hz, 3H, CHCH<sub>3</sub>); **<sup>13</sup>C NMR** (126 MHz, CDCl<sub>3</sub>) δ<sub>C</sub> 174.6 (C=O), 145.1 (C), 128.5 (CH), 127.5 (CH), 124.3 (CH), 83.5 (C, cumyl), 67.0 (CH), 28.8 (CH<sub>3</sub>, cumyl), 28.4 (CH<sub>3</sub>, cumyl), 20.6 (CHCH<sub>3</sub>); **v<sub>max</sub>** (neat) = 3358 (OH), 3058, 2977, 2937, 1721 (C=O), 1446, 1368, 1219, 1123, 1042 cm<sup>-1</sup>; **MS** (ESI<sup>+</sup>) *m/z* 231 [M+Na]<sup>+</sup>, 439 [2M+Na]<sup>+</sup>; **HRMS** (ESI<sup>+</sup>) calcd. for C<sub>12</sub>H<sub>16</sub>NaO<sub>3</sub> [M+Na]<sup>+</sup> 231.0992, found 231.0994; [α]<sub>D</sub><sup>22</sup> -3.5 (*c* 0.50, CHCl<sub>3</sub>).

## (*R*)-1-Oxo-1-[(2-phenylpropan-2-yl)oxy]propan-2-yl 4-nitrobenzoate (27)

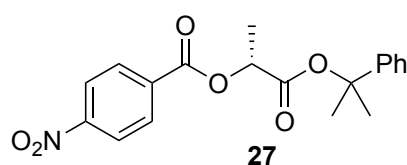

To (*S*)-12 (1.27 g, 6.08 mmol, 1.0 equiv) in CH<sub>2</sub>Cl<sub>2</sub> (61 mL) was added triphenylphosphine (2.39 g, 9.12 mmol, 1.5 equiv) and 4-nitrobenzoic acid (1.52 g, 9.12 mmol, 1.5 equiv) and the reaction mixture cooled to 0 °C. Diethyl azodicarboxylate (1.44 mL, 9.12 mmol, 1.5 equiv) was added dropwise and the mixture stirred at room temperature for 16 h. The reaction mixture was concentrated under reduced pressure and the crude mixture dissolved in EtOAc (150 mL). The organic layer was washed with a saturated solution of NaHCO<sub>3</sub> (3 × 50 mL) and brine (25 mL), dried over MgSO<sub>4</sub>, filtered and concentrated under reduced pressure. Purification by column chromatography (SiO<sub>2</sub>, PE/EtOAc 9:1) gave **27** (2.06 g, 5.77 mmol, 95%) as a yellow oil. **R<sub>f</sub>** (PE/EtOAc 9:1) 0.30; **<sup>1</sup>H NMR** (500 MHz, CDCl<sub>3</sub>) δ<sub>H</sub> 8.30–8.26 (m, 2H, ArH), 8.26–8.21 (m, 2H, ArH), 7.39–7.29 (m, 4H, ArH), 7.28–7.22 (m, 1H, ArH), 5.35 (q, *J* = 7.1 Hz, 1H, CH), 1.82 (s, 3H, CH<sub>3</sub>, cumyl), 1.80 (s, 3H, CH<sub>3</sub>, cumyl), 1.67 (d, *J* = 7.1 Hz, 3H, CHCH<sub>3</sub>); **<sup>13</sup>C NMR** (126 MHz, CDCl<sub>3</sub>) δ<sub>C</sub> 168.7 (C=O), 164.2 (C=O), 150.8 (C), 145.0 (C), 135.2 (C), 131.1 (CH), 128.5 (CH), 127.5 (CH), 124.3 (CH), 123.6 (CH), 83.7 (C, cumyl), 70.3 (CH), 28.8 (CH<sub>3</sub>, cumyl), 28.3 (CH<sub>3</sub>, cumyl), 17.0 (CHCH<sub>3</sub>); **v<sub>max</sub>** (neat) = 3112, 3058, 2985, 2940, 2877, 1753 (C=O), 1726 (C=O), 1525, 1346, 1268, 1213, 1098 cm<sup>-1</sup>; **MS** (ESI<sup>+</sup>) *m/z* 380 [M+Na]<sup>+</sup>, 396 [M+K]<sup>+</sup>; **HRMS** (ESI<sup>+</sup>) calcd. for C<sub>19</sub>H<sub>19</sub>NNaO<sub>6</sub> [M+Na]<sup>+</sup> 380.1105, found 380.1110; [α]<sub>D</sub><sup>22</sup> +6.9 (*c* 1.60, CHCl<sub>3</sub>).

## 2-Phenylpropan-2-yl (*R*)-2-hydroxypropanoate ((*R*)-12)

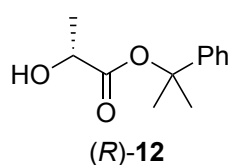

To **27** (3.12 g, 8.74 mmol, 1.0 equiv) in MeOH (87 mL) was added K<sub>2</sub>CO<sub>3</sub> (1.27 g, 9.17 mmol, 1.05 equiv) and the reaction mixture stirred at room temperature for 5 min before it was quenched with a saturated solution of aqueous NH<sub>4</sub>Cl (150 mL). The resulting mixture was extracted with EtOAc (3 × 150 mL) and the combined organic layers were washed with brine (50 mL), dried

over MgSO<sub>4</sub>, filtered and concentrated under reduced pressure. The crude product was purified by column chromatography (SiO<sub>2</sub>, PE/EtOAc 9:1→85:15) to give (*R*)-**12** (1.52 g, 7.32 mmol, 84%) as a colourless oil that crystallised to a white solid upon storage at -20 °C. **mp** 58–60 °C; <sup>1</sup>H NMR (500 MHz, CDCl<sub>3</sub>) δ<sub>H</sub> 7.38–7.32 (m, 4H, ArH), 7.31–7.24 (m, 1H ArH), 4.23 (qd, *J* = 6.8, 5.4 Hz, 1H, CH), 2.76 (d, *J* = 5.4 Hz, 1H, OH), 1.82 (s, 3H, CH<sub>3</sub>, cumyl), 1.80 (s, 3H, CH<sub>3</sub>, cumyl), 1.45 (d, *J* = 6.8 Hz, 3H, CHCH<sub>3</sub>); [α]<sub>D</sub><sup>21</sup> +1.0 (*c* 0.70, CHCl<sub>3</sub>). Other analytical data as described for (*S*)-**12**.

### Fmoc-D-AOx-Ala-OCumyl ((*R,S*)-**14**)

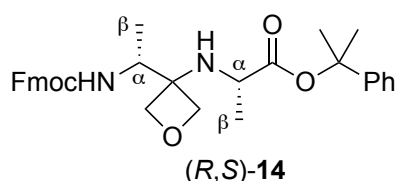

The synthesis of (*R,S*)-**14** was adapted from a procedure originally published by Carreira and co-workers.<sup>3</sup> To (*R*)-**12** (459 mg, 2.20 mmol, 1.0 equiv) in CH<sub>2</sub>Cl<sub>2</sub> (10 mL) at -20 °C was added DIPEA (825 μL, 4.74 mmol, 2.15 equiv) followed by the dropwise addition of a solution of triflic anhydride (408 μL, 2.42 mmol, 1.1 equiv) in CH<sub>2</sub>Cl<sub>2</sub> (2.5 mL). The reaction mixture was allowed to reach room temperature and stirred for 1 h. Petroleum ether (12.5 mL) was added and the reaction mixture was filtered through a plug of silica gel eluting with 50% CH<sub>2</sub>Cl<sub>2</sub> in petroleum ether. The eluent was concentrated under reduced pressure to give triflate **13** (629 mg, 1.85 mmol, 84%), which was used immediately without further purification. To triflate **13** in MeCN (4.0 mL) was added a solution of (*R*)-**10** (377 mg, 1.12 mmol, 1.0 equiv) and DIPEA (322 μL, 1.85 mmol, 1.65 equiv) in MeCN (4.0 mL). The reaction mixture was stirred at 30 °C for 20 h and then concentrated under reduced pressure. The crude material was purified by repeat column chromatography (SiO<sub>2</sub>, PE/EtOAc 7:3→3:2; CH<sub>2</sub>Cl<sub>2</sub>/EtOAc 9:1→4:1) to give (*R,S*)-**14** (340 mg, 0.64 mmol, 57%, dr 98:2) as a white solid. **R<sub>f</sub>** (PE/EtOAc 7:3) 0.21; **mp** 63–65 °C; <sup>1</sup>H NMR (500 MHz, CDCl<sub>3</sub>) δ<sub>H</sub> 7.76 (d, *J* = 7.4 Hz, 2H, ArH), 7.58 (d, *J* = 7.4 Hz, 2H, ArH), 7.43–7.23 (m, 9H, ArH), 5.20 (d, *J* = 8.3 Hz, 1H, NH), 4.61–4.40 (m, 8H, CHCH<sub>2</sub>-Fmoc, CHα-AOx, 2 × OCH<sub>2</sub>-Ox), 3.88–3.76 (m, 1H, CHα-Ala), 2.07 (br. s, 1H, NH), 1.82 (s, 3H, CH<sub>3</sub>, cumyl), 1.79 (s, 3H, CH<sub>3</sub>, cumyl), 1.38 (d, *J* = 6.9 Hz, 3H, CH<sub>3</sub>β-Ala), 1.12 (d, *J* = 6.4 Hz, 3H, CH<sub>3</sub>β-AOx); <sup>13</sup>C NMR (126 MHz, CDCl<sub>3</sub>) δ<sub>C</sub> 175.6 (C=O), 156.3 (C=O, Fmoc), 145.2 (C), 144.1 (C), 141.5 (C), 128.5 (CH), 127.8 (CH), 127.5 (CH), 127.2 (CH), 125.20 (CH), 125.18 (CH), 124.3 (CH), 120.1 (CH), 82.8 (C, Ox), 79.0 (OCH<sub>2</sub>), 77.9 (OCH<sub>2</sub>), 66.7 (CH<sub>2</sub>, Fmoc), 62.5 (C, Ox), 52.0 (CH, α-AOx), 51.2 (CH, α-Ala), 47.5 (CH, Fmoc), 28.8 (CH<sub>3</sub>, cumyl), 28.2 (CH<sub>3</sub>, cumyl), 21.7 (CH<sub>3</sub>, β-Ala), 14.6 (CH<sub>3</sub>, β-AOx). *N.B.* Two aromatic C signals not observed; **v**<sub>max</sub> (neat) = 3332 (NH), 2977, 2942, 2875, 1719 (C=O), 1496, 1447, 1270, 1131 cm<sup>-1</sup>; **MS** (ESI<sup>+</sup>) *m/z* 529 [M+H]<sup>+</sup>, 551 [M+Na]<sup>+</sup>; **HRMS** (ESI<sup>+</sup>) calcd. for C<sub>32</sub>H<sub>36</sub>N<sub>2</sub>NaO<sub>5</sub> [M+Na]<sup>+</sup> 551.2516, found 551.2520; [α]<sub>D</sub><sup>22</sup> -18.4 (*c* 0.38, CHCl<sub>3</sub>); **HPLC** (Chiralcel OD-H (0.46 cm × 25 cm, 5 μm), 20% isopropanol in hexane, 25 °C, 1.0 mL/min, λ = 254 nm) *t<sub>R</sub>* = 55 min (major), 97 min (minor).

### Fmoc-L-AOx-Ala-OCumyl ((*S,S*)-14)

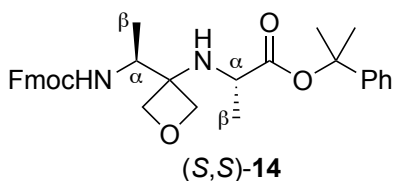

The synthesis of (*S,S*)-**14** was adapted from a procedure originally published by Carreira and co-workers.<sup>3</sup> To (*R*)-**12** (458 mg, 2.20 mmol, 1.0 equiv) in CH<sub>2</sub>Cl<sub>2</sub> (10 mL) at -20 °C was added DIPEA (824 μL, 4.73 mmol, 2.15 equiv) followed by the dropwise addition of a solution of triflic anhydride (407 μL, 2.42 mmol, 1.1 equiv) in CH<sub>2</sub>Cl<sub>2</sub> (2.5 mL). The reaction mixture was allowed to reach room temperature and stirred for 1 h. Petroleum ether (12.5 mL) was added and the reaction mixture filtered through a plug of silica gel eluting with 50% CH<sub>2</sub>Cl<sub>2</sub> in petroleum ether. The eluent was concentrated under reduced pressure to give triflate **13** (734 mg, 2.16 mmol, 98%) which was used immediately without further purification. To triflate **13** in MeCN (4.0 mL) was added a solution of (*S*)-**10** (338 mg, 1.00 mmol, 1.0 equiv) and DIPEA (376 μL, 2.16 mmol, 2.16 equiv) in MeCN (4.0 mL). The reaction mixture was stirred at 30 °C for 20 h and then concentrated under reduced pressure. The crude material was purified by repeat column chromatography (SiO<sub>2</sub>, PE/EtOAc 7:3→3:2; CH<sub>2</sub>Cl<sub>2</sub>/EtOAc 9:1→4:1) to give (*S,S*)-**14** (264 mg, 0.50 mmol, 50%, dr >98:2) as a white solid. **R<sub>f</sub>** (PE/EtOAc 7:3) 0.20; **mp** 73–76 °C; **<sup>1</sup>H NMR** (500 MHz, CDCl<sub>3</sub>) δ<sub>H</sub> 7.76 (d, *J* = 7.5 Hz, 2H, ArH), 7.59 (d, *J* = 7.5 Hz, 2H, ArH), 7.44–7.21 (m, 9H, ArH), 5.57 (d, *J* = 7.1 Hz, 1H, NH), 4.67–3.81 (m, 8H, 2 × OCH<sub>2</sub>-Ox, CH<sub>2</sub>CH-Fmoc, CH<sub>α</sub>-AOx), 3.79–3.64 (m, 1H, CH<sub>α</sub>-Ala), 1.82 (s, 3H, CH<sub>3</sub>, cumyl), 1.80–1.70 (m, 4H, CH<sub>3</sub>, cumyl, NH), 1.38 (d, *J* = 6.8 Hz, 3H, CH<sub>3</sub>β-Ala), 1.16 (d, *J* = 5.9 Hz, 3H, CH<sub>3</sub>β-AOx); **<sup>13</sup>C NMR** (126 MHz, CDCl<sub>3</sub>) δ<sub>C</sub> 175.5 (C=O), 156.5 (C=O, Fmoc), 145.2 (C), 144.12 (C), 144.10 (C), 141.5 (C), 128.5 (CH), 127.8 (CH), 127.5 (CH), 127.2 (CH), 125.4 (CH), 125.3 (CH), 124.4 (CH), 120.1 (CH), 82.8 (C, cumyl), 79.1 (OCH<sub>2</sub>), 78.9 (OCH<sub>2</sub>), 66.8 (CH<sub>2</sub>, Fmoc), 62.4 (C, Ox), 52.1 (CH, α-Ala), 52.0 (CH, α-AOx), 47.4 (CH, Fmoc), 28.9 (CH<sub>3</sub>, cumyl), 28.1 (CH<sub>3</sub>, cumyl), 20.8 (CH<sub>3</sub>, β-Ala), 14.9 (CH<sub>3</sub>, β-AOx). *N.B.* One aromatic C signal not observed; **v<sub>max</sub>** (neat) = 3329 (NH), 2976, 2937, 1718 (C=O), 1497, 1448, 1242, 1132, 1077 cm<sup>-1</sup>; **MS** (ESI<sup>+</sup>) *m/z* 529 [M+H]<sup>+</sup>, 551 [M+Na]<sup>+</sup>, 567 [M+K]<sup>+</sup>; **HRMS** (ESI<sup>+</sup>) calcd. for C<sub>32</sub>H<sub>36</sub>N<sub>2</sub>NaO<sub>5</sub> [M+Na]<sup>+</sup> 551.2516, found 551.2512; [α]<sub>D</sub><sup>18</sup> -13.4 (*c* 0.25, CHCl<sub>3</sub>); **HPLC** (Chiralcel OD-H (0.46 cm × 25 cm, 5 μm), 20% isopropanol in hexane, 25 °C, 1.0 mL/min, λ = 254 nm) *t<sub>R</sub>* = 56 min (minor), 87 min (major).

### (9*H*-Fluoren-9-yl)methyl (11)

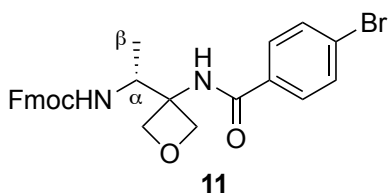

To (*R*)-**10** (289 mg, 0.85 mmol, 1.0 equiv) in CH<sub>2</sub>Cl<sub>2</sub> (9.0 mL) was added DIPEA (297 μL, 1.71 mmol, 2.0 equiv) and 4-bromobenzoyl chloride (375 mg, 1.71 mmol, 2.0 equiv). The mixture was stirred at room temperature for 16 h. The reaction mixture was diluted with CH<sub>2</sub>Cl<sub>2</sub> (20 mL), washed with a saturated solution of NaHCO<sub>3</sub> (20 mL) and brine (10 mL), dried over MgSO<sub>4</sub>, filtered and concentrated under reduced pressure. Purification by column chromatography (SiO<sub>2</sub>, PE/EtOAc 2:3) gave **11** (384 mg, 0.74 mmol, 87%) as a white solid. A crystal suitable for X-ray analysis was grown from toluene. **R<sub>f</sub>** (PE/EtOAc 2:3) 0.43; **mp** 164–167 °C; **<sup>1</sup>H NMR** (500 MHz, CDCl<sub>3</sub>) δ<sub>H</sub> 7.76 (d, *J* = 7.6 Hz, 2H, ArH), 7.67 (d, *J* = 8.0 Hz, 2H, ArH),



7.61–7.53 (m, 4H, ArH), 7.44–7.36 (m, 2H, ArH), 7.33–7.25 (m, 2H, ArH), 6.91 (s, 1H, NH), 5.93 (d,  $J = 7.1$  Hz, 1H, NH), 4.98 (d,  $J = 6.6$  Hz, 1H, OCHH-Ox), 4.92 (d,  $J = 6.6$  Hz, 1H, OCHH-Ox), 4.67 (d,  $J = 6.6$  Hz, 1H, OCHH-Ox), 4.57 (d,  $J = 6.6$  Hz, 1H, OCHH-Ox), 4.46–4.27 (m, 3H, CH<sub>2</sub>-Fmoc, CH $\alpha$ -AOx), 4.23–4.16 (m, 1H, CH-Fmoc), 1.36 (d,  $J = 6.4$  Hz, 3H, CH<sub>3</sub> $\beta$ -AOx); <sup>13</sup>C NMR (126 MHz, CDCl<sub>3</sub>)  $\delta_c$  167.1 (C=O), 157.0 (C=O, Fmoc), 143.94 (C), 143.89 (C), 141.5 (C), 141.4 (C), 132.6 (C), 132.1 (CH), 128.8 (CH), 127.9 (CH), 127.2 (CH), 127.1 (C), 125.2 (CH), 120.1 (CH), 78.0 (OCH<sub>2</sub>), 77.5 (OCH<sub>2</sub>), 67.1 (CH<sub>2</sub>, Fmoc), 60.7 (C, Ox), 52.6 (CH,  $\alpha$ -AOx), 47.3 (CH, Fmoc), 15.5 (CH<sub>3</sub>,  $\beta$ -AOx);  $\nu_{\max}$  (neat) = 3371 (NH), 3352 (NH), 2967, 2893, 1693 (C=O), 1643 (C=O), 1516, 1248, 989 cm<sup>-1</sup>; MS (ESI<sup>+</sup>)  $m/z$  543 [M(<sup>79</sup>Br)+Na]<sup>+</sup>, 545 [M(<sup>81</sup>Br)+Na]<sup>+</sup>; HRMS (ESI<sup>+</sup>) calcd. for C<sub>27</sub>H<sub>25</sub>BrN<sub>2</sub>NaO<sub>4</sub> [M+Na]<sup>+</sup> 543.0890 (<sup>79</sup>Br) and 545.0874 (<sup>81</sup>Br), found 543.0890 (<sup>79</sup>Br) and 545.0873 (<sup>81</sup>Br); [ $\alpha$ ]<sub>D</sub><sup>22</sup> +23.5 ( $c$  0.50, CHCl<sub>3</sub>).

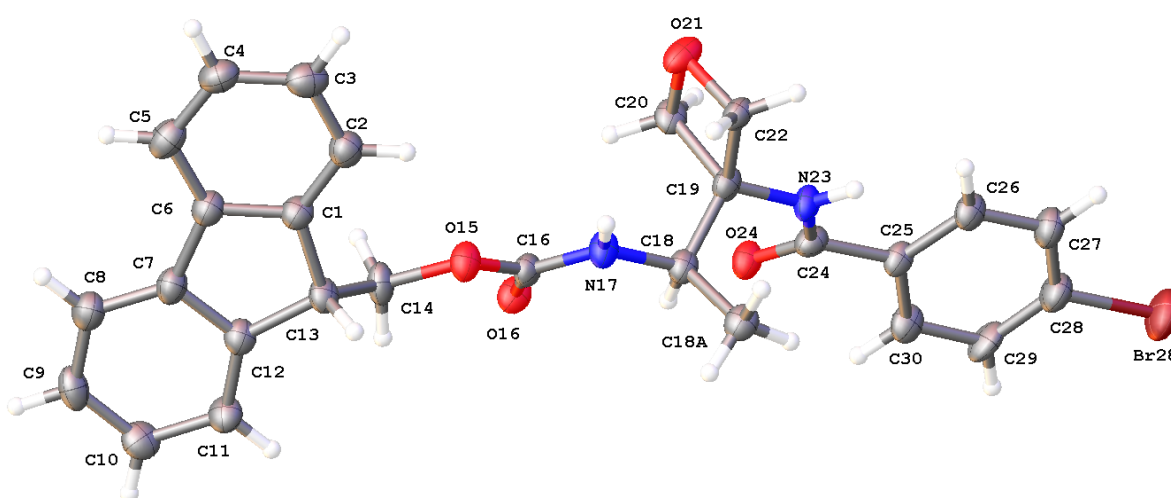

**Crystal Data** for C<sub>28.75</sub>H<sub>27</sub>BrN<sub>2</sub>O<sub>4</sub> (CCDC 2005273,  $M = 544.43$  g/mol): monoclinic, space group C2 (no. 5),  $a = 25.7843(4)$  Å,  $b = 5.30700(10)$  Å,  $c = 18.5521(3)$  Å,  $\beta = 95.2280(10)^\circ$ ,  $V = 2528.06(7)$  Å<sup>3</sup>,  $Z = 4$ ,  $T = 100(2)$  K,  $\mu(\text{CuK}\alpha) = 2.526$  mm<sup>-1</sup>,  $D_{\text{calc}} = 1.430$  g/cm<sup>3</sup>, 22540 reflections measured ( $6.884^\circ \leq 2\theta \leq 136.32^\circ$ ), 4460 unique ( $R_{\text{int}} = 0.0686$ ,  $R_{\text{sigma}} = 0.0454$ ) which were used in all calculations. The final  $R_1$  was 0.0722 ( $I > 2\sigma(I)$ ) and  $wR_2$  was 0.2005 (all data).

## Diastereomeric purity of (*R,S*)-**9** and (*S,R*)-**9**

Confirmation that (*R,S*)-**9** was isolated as a single diastereoisomer (dr >95:5) was demonstrated by comparison of the NO<sub>2</sub>CH signals in the crude <sup>1</sup>H NMR (300 MHz, CDCl<sub>3</sub>) spectrum with the same region in the <sup>1</sup>H NMR (500 MHz, CDCl<sub>3</sub>) spectrum after column chromatography. Integration of the signals at 5.05 (q, *J* = 6.8 Hz) ppm and 4.86 (q, *J* = 6.9 Hz) ppm in spectrum **A** relative to that in spectrum **B** confirmed dr >95:5. <sup>1</sup>H NMR analysis of (*S,R*)-**4** was conducted in the same fashion and also confirmed dr >95:5.

### A. Expanded <sup>1</sup>H NMR (300 MHz, CDCl<sub>3</sub>) of crude (*R,S*)-**9**

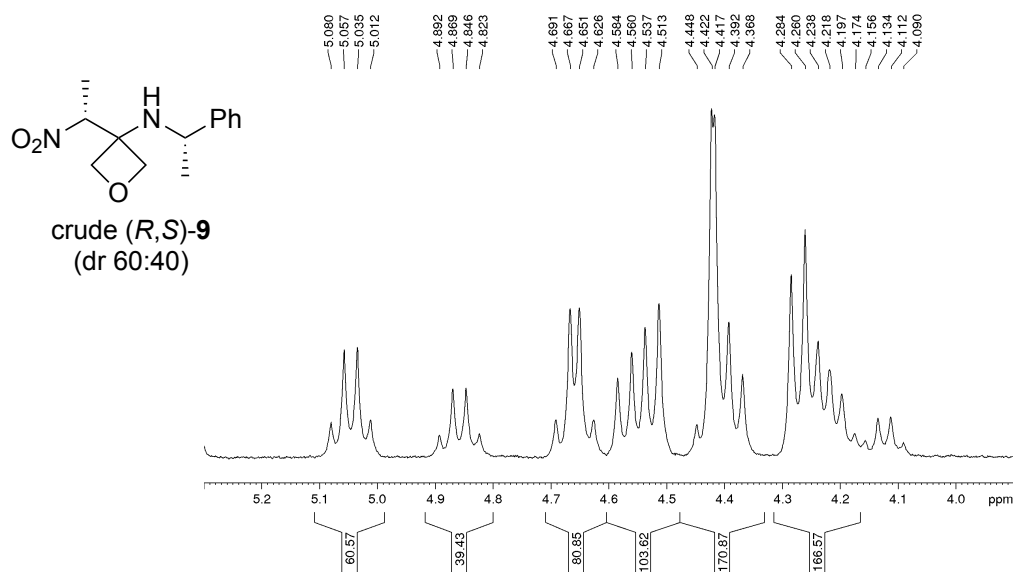

### B. Expanded <sup>1</sup>H NMR (500 MHz, CDCl<sub>3</sub>) of (*R,S*)-**9** after column chromatography

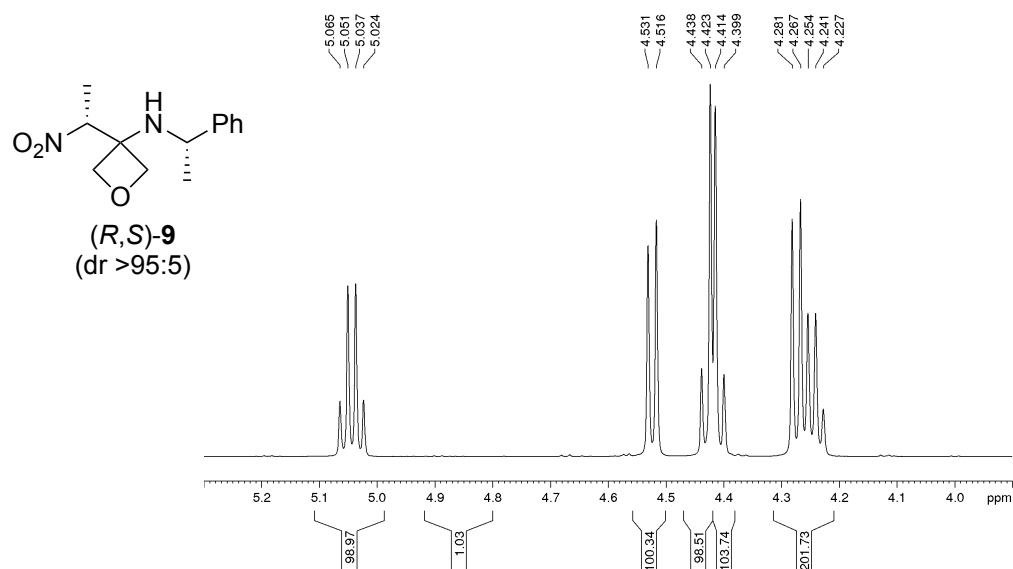

## HPLC Analysis of ( $\pm$ ,*S*)-14, (*R,S*)-14 and (*S,S*)-14

HPLC analysis was conducted on an Agilent Technologies 1200 Series HPLC, using Chiralcel OD-H column (0.46 cm  $\times$  25 cm, 5  $\mu$ m) at 25  $^{\circ}$ C, with detection by UV at 254 nm. Samples were eluted at a flow rate of 1.0 mL/min with a mobile phase system composed of 20% isopropanol in hexane. Retention times ( $t_R$ ) are reported in minutes.

### ( $\pm$ ,*S*)-14

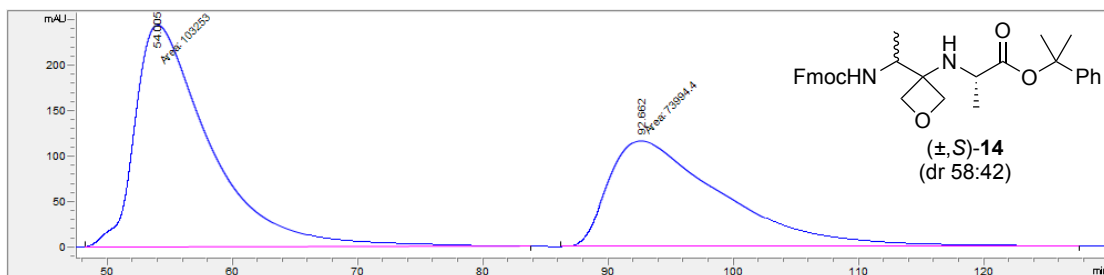

| # | Time   | Area     | Height | Width   | Area%  | Symmetry |
|---|--------|----------|--------|---------|--------|----------|
| 1 | 54.005 | 103252.9 | 245.4  | 7.0114  | 58.254 | 0.423    |
| 2 | 92.662 | 73994.4  | 116.8  | 10.5588 | 41.746 | 0.391    |

### (*R,S*)-14

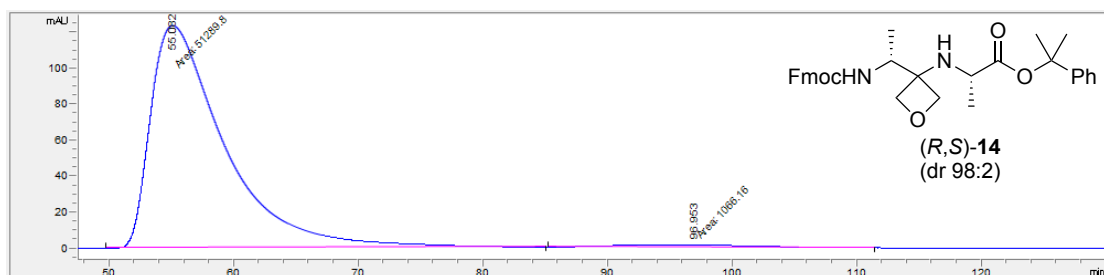

| # | Time   | Area    | Height | Width   | Area%  | Symmetry |
|---|--------|---------|--------|---------|--------|----------|
| 1 | 55.082 | 51289.8 | 123.4  | 6.929   | 97.964 | 0.41     |
| 2 | 96.953 | 1066.2  | 1.3    | 13.2996 | 2.036  | 1.216    |

### (*S,S*)-14

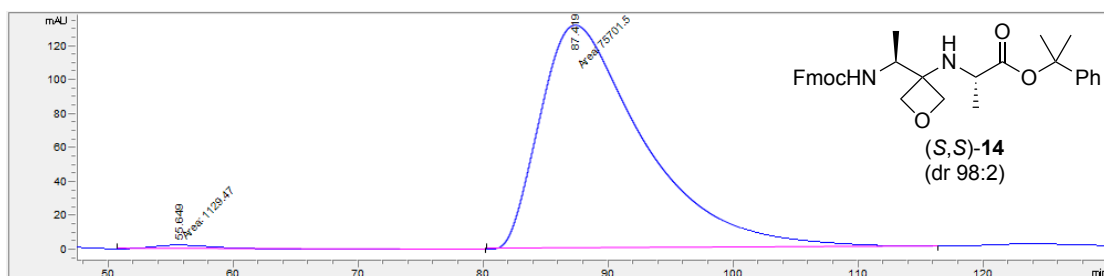

| # | Time   | Area    | Height | Width  | Area%  | Symmetry |
|---|--------|---------|--------|--------|--------|----------|
| 1 | 55.649 | 1129.5  | 2.3    | 8.1607 | 1.470  | 0.399    |
| 2 | 87.419 | 75701.5 | 131.1  | 9.6274 | 98.530 | 0.498    |

### 3. Solid phase peptide synthesis

#### *General information*

All peptides were synthesised on a NovaSyn® TGR R (0.18 mmol/g, 0.025 mmol) resin (Novabiochem) on a Prelude peptide synthesizer (ProteinTechnologies Inc.) using an Fmoc/*t*Bu protecting group strategy. Couplings were performed under standard coupling conditions using HATU/DIPEA or HCTU/NMM. Oxetane building blocks were manually incorporated by double coupling using 2 equiv of building block, 1.9 equiv HATU and 6 equiv DIPEA. Fmoc-deprotection was achieved with 20% piperidine in DMF and capping after every coupling step with Ac<sub>2</sub>O (5%) and NMM (5%) in DMF. Crude peptides were purified by preparative HPLC (Agilent Infinity 1260) on a Agilent PLRP-S column (100 Å, 8 µm, 150×25 mm).

#### *Loading the resin with Fmoc-Tyr(*t*Bu)-OH*

NovaSyn® TGR R (0.18 mmol/g, 139 mg, 0.025 mmol, 1.0 equiv) resin was pre-swollen in DMF for 1 h and washed with DMF. Fmoc-Tyr(*t*Bu)-OH (0.25 mmol, 115 mg, 10 equiv), PyBOP (0.25 mmol, 130 mg, 10 equiv) and DIPEA (0.5 mmol, 87 µL, 20 equiv) in DMF (1.5 mL) were added to the resin and the mixture was agitated for 1 h at room temperature. The solvent was removed and the resin washed several times with DMF. Loading was repeated in case of a positive TNBS-test.

#### *Peptide synthesis*

Peptides were synthesized on the peptide synthesizer using N- $\alpha$ -Fmoc protected amino acids (10 equiv), HCTU (10 equiv) and NMM (20 equiv). The first twelve amino acids were attached by double coupling (45 min each), whereas for the last five amino acids triple couplings were performed. After each amino acid, the peptide was capped with Ac<sub>2</sub>O:NMM:DMF (5:5:90; v/v/v) at room temperature for 2 × 15 min. After the last amino acid, the Fmoc group was cleaved manually with 20% piperidine in DMF at room temperature for 20 min and the N-terminus was capped with Ac<sub>2</sub>O:NMM:DMF (5:5:90; v/v/v) at room temperature for 2 × 20 min.

In case of the oxetane-modified peptides, the oxetane-containing dipeptide building blocks were first deprotected as follows; (*S,S*)-**14** or **15** (2.0 equiv) in 2% TFA/CH<sub>2</sub>Cl<sub>2</sub> (0.05 M) was stirred at room temperature until consumption of starting material. The reaction mixture was concentrated under reduced pressure and the resulting residue dissolved in CH<sub>2</sub>Cl<sub>2</sub> and concentrated under reduced pressure (3×) to give the crude acid **16** or **17**. The crude acid was manually double coupled using HATU (1.9 equiv) and DIPEA (6.0 equiv) at room temperature for 2-12 h until a negative TNBS test was observed. In case of the N-terminal modified peptides the last two coupling steps with alanine and lysine were also done manually under standard conditions.

In all cases, cleavage from the resin was achieved with 95% TFA, 2.5% TIS, 2.5% water. The cleavage solution was concentrated under a stream of nitrogen and the peptide was precipitated in ice-cold ether. The crude peptide was re-dissolved in water/acetonitrile and purified by preparative HPLC (A: H<sub>2</sub>O (0.1 % TFA), B: MeCN (0.1 % TFA)).

**Parent peptide 18**Gradient: 0–5 min, 5% B; 5–30 min, 5–50% B, 30–35 min, 50–100% B;  $t_R$ : 19.3 min.**Central AlaOX 19**Gradient: 0–5 min, 5% B; 5–35 min, 5–35% B, 35–40 min, 50–100% B;  $t_R$ : 22.7 min.**Terminal AlaOX 20**Gradient: 0–3 min, 5% B; 3–22 min, 5–30% B, 22–27 min, 30–100% B;  $t_R$ : 17.2 min.**Treminal GlyOX 21**Gradient: 0–3 min, 5% B; 3–22 min, 5–30% B, 22–27 min, 30–100% B;  $t_R$ : 16.2 min.*Analytical data*

Pure peptides were analysed on an Agilent Technologies 1200 Series RP-HPLC, using an Agilent Eclipse Plus C18 (5  $\mu$ m, 4.6  $\times$  150 mm) at 25 °C, with detection by UV at 214 and 280 nm. Gradients were run using a solvent system consisting of solution A (5% MeCN in H<sub>2</sub>O + 0.1% TFA) and B (5% H<sub>2</sub>O in MeCN + 0.1% TFA). Two gradients were used to characterise each peptide; a gradient from 5–95% solution B over 20 min and a gradient from 5–50% solution B over 20 min. Analytical RP-HPLC data is recorded as column retention time ( $t_R$ ) in min. High-resolution mass spectra were recorded using a Bruker MaXis Impact.

**Table S1.** Peptide characterisation data

| Entry | Peptide Sequence                                                                 | $t_R$ (min) <sup>a</sup> | Purity (%) <sup>b,c</sup> |
|-------|----------------------------------------------------------------------------------|--------------------------|---------------------------|
| 1     | Ac-KAAAA-KAAAA-KAAAA-KGY-NH <sub>2</sub> , <b>18</b><br>parent                   | 8.75 + 10.46             | 92                        |
| 2     | Ac-KAAAA-KAAOxAA-KAAAA-KGY-NH <sub>2</sub> , <b>19</b><br>central AOx            | 7.83 + 8.61              | 90                        |
| 3     | Ac-KAAOxAA-KAAAA-KAAAA-KGY-NH <sub>2</sub> , <b>20</b><br><i>N</i> -terminal AOx | 9.39 + 11.47             | 76                        |
| 4     | Ac-KAGOxAA-KAAAA-KAAAA-KGY-NH <sub>2</sub> , <b>21</b><br><i>N</i> -terminal GOx | 9.35 + 11.38             | 90                        |

<sup>a</sup> First  $t_R$  is the gradient from 5–95% solution B over 20 min; second number is the gradient from 5–50% over 20 min.<sup>b</sup> Measured at 214 nm. <sup>c</sup> Lowest purity of the two gradients runs.**Table S2.** Peptide characterisation data

| Entry | Peptide Sequence                                                                 | HRMS                              |                                   | $\Delta$ MW (ppm) |
|-------|----------------------------------------------------------------------------------|-----------------------------------|-----------------------------------|-------------------|
|       |                                                                                  | Calculated                        | Observed                          |                   |
| 1     | Ac-KAAAA-KAAAA-KAAAA-KGY-NH <sub>2</sub> , <b>18</b><br>parent                   | 822.9808<br>[M+2H] <sup>2+</sup>  | 822.9808<br>[M+2H] <sup>2+</sup>  | 0.0               |
| 2     | Ac-KAAAA-KAAOxAA-KAAAA-KGY-NH <sub>2</sub> , <b>19</b><br>central AOx            | 858.9784<br>[M+2Na] <sup>2+</sup> | 858.9766<br>[M+2Na] <sup>2+</sup> | 2.1               |
| 3     | Ac-KAAOxAA-KAAAA-KAAAA-KGY-NH <sub>2</sub> , <b>20</b><br><i>N</i> -terminal AOx | 558.3334<br>[M+3H] <sup>3+</sup>  | 558.3331<br>[M+3H] <sup>3+</sup>  | –0.5              |
| 4     | Ac-KAGOxAA-KAAAA-KAAAA-KGY-NH <sub>2</sub> , <b>21</b><br><i>N</i> -terminal GOx | 851.9706<br>[M+2Na] <sup>2+</sup> | 851.9701<br>[M+2Na] <sup>2+</sup> | –0.6              |

### Ac-KAAAA-KAAAA-KAAAA-KGY-NH<sub>2</sub> (18)

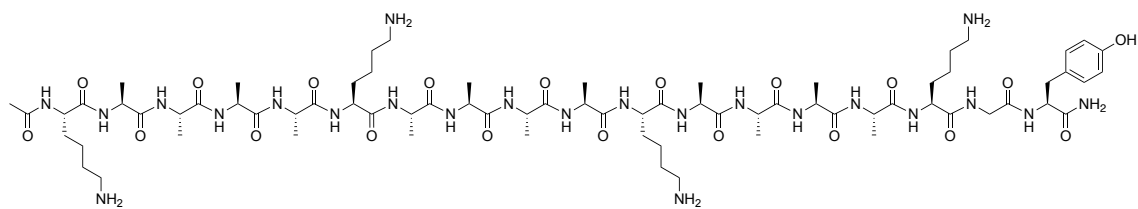

#### Analytical HPLC (5-95% gradient)

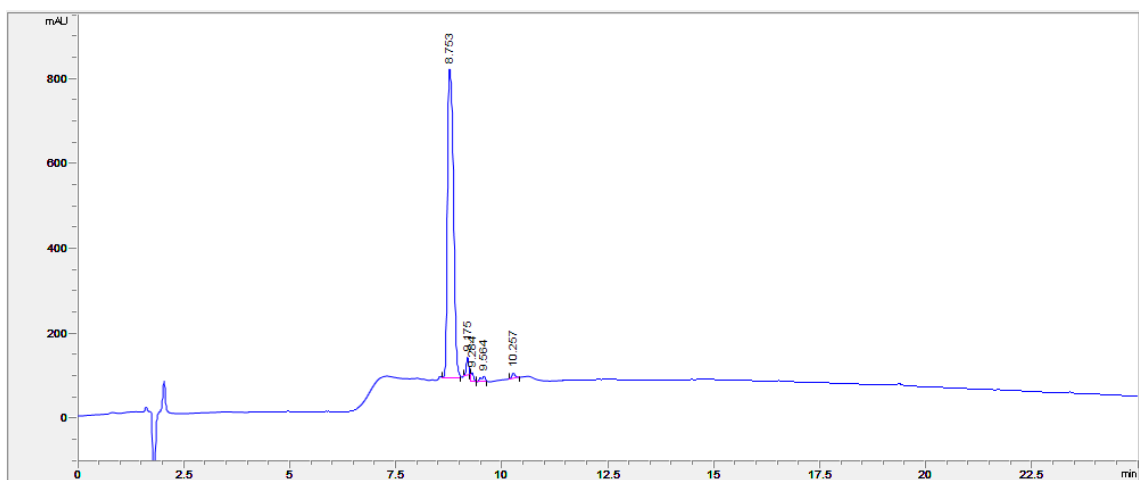

| # | Time   | Area   | Height | Width  | Area%  | Symmetry |
|---|--------|--------|--------|--------|--------|----------|
| 1 | 8.753  | 7078.9 | 726.6  | 0.1624 | 94.512 | 0.562    |
| 2 | 9.175  | 163.4  | 42.7   | 0.0637 | 2.182  | 0.965    |
| 3 | 9.284  | 70.2   | 20.2   | 0.0578 | 0.937  | 0.332    |
| 4 | 9.564  | 107.8  | 13.9   | 0.1293 | 1.440  | 2.122    |
| 5 | 10.257 | 69.7   | 12.5   | 0.093  | 0.930  | 0.803    |

#### Analytical HPLC (5-50% gradient)

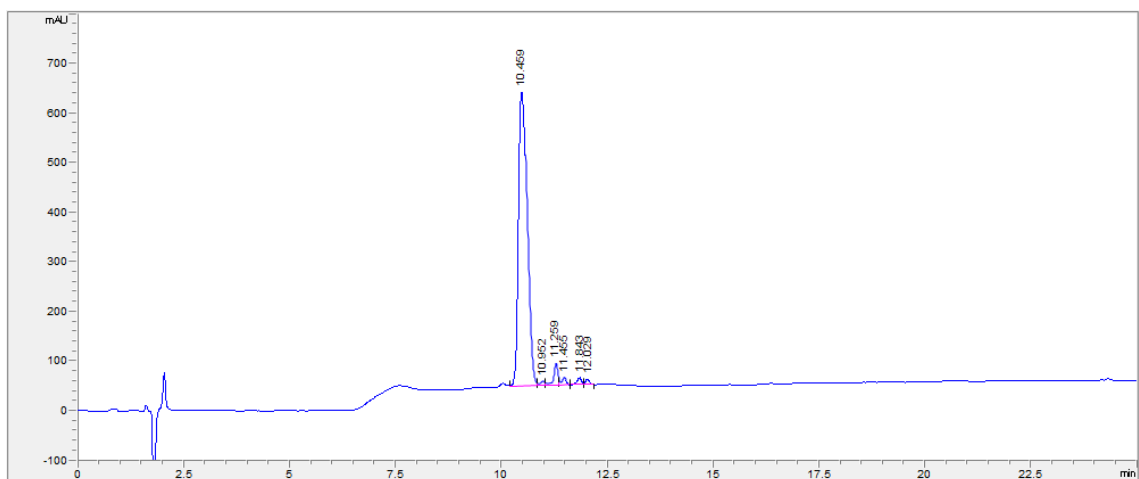

| # | Time   | Area   | Height | Width  | Area%  | Symmetry |
|---|--------|--------|--------|--------|--------|----------|
| 1 | 10.459 | 8226.4 | 593.6  | 0.2237 | 92.041 | 0.583    |
| 2 | 10.952 | 85.2   | 9.8    | 0.1231 | 0.954  | 1.169    |
| 3 | 11.259 | 321.6  | 44.8   | 0.1057 | 3.598  | 1.171    |
| 4 | 11.455 | 109.8  | 16     | 0.1038 | 1.228  | 0.985    |
| 5 | 11.843 | 118.9  | 14.9   | 0.1173 | 1.330  | 1.272    |
| 6 | 12.029 | 75.9   | 11.2   | 0.103  | 0.849  | 0.892    |

## Ac-KAAAA-KAAO<sub>x</sub>AA-KAAAA-KGY-NH<sub>2</sub> (19)

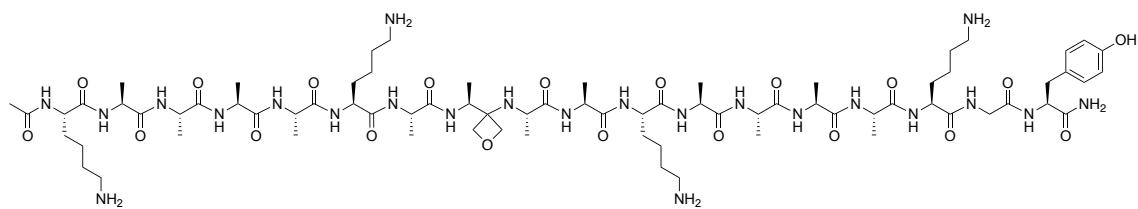

### Analytical HPLC (5-95% gradient)

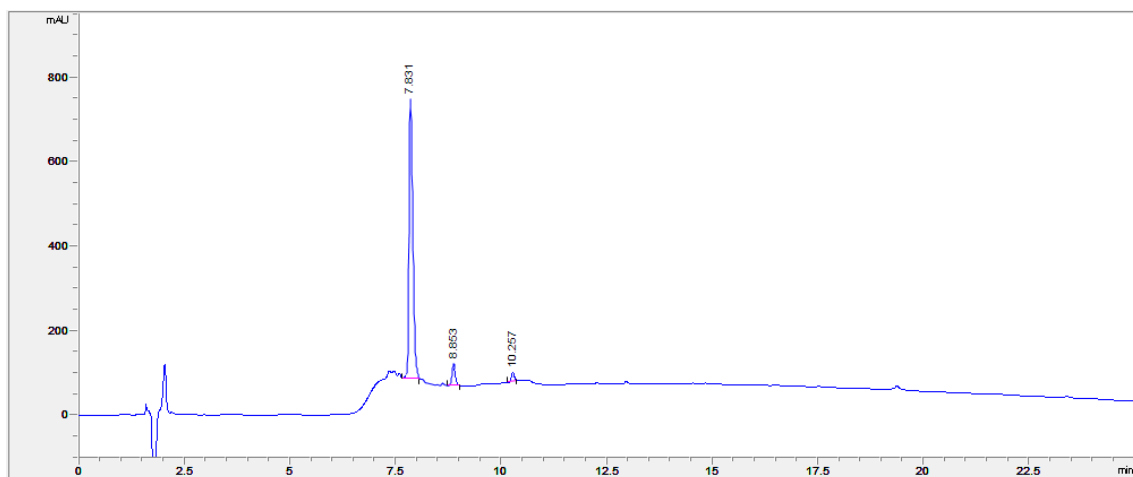

| # | Time   | Area   | Height | Width  | Area%  | Symmetry |
|---|--------|--------|--------|--------|--------|----------|
| 1 | 7.831  | 4160.5 | 662.8  | 0.1046 | 90.857 | 0.581    |
| 2 | 8.853  | 308.9  | 52.3   | 0.0984 | 6.746  | 0.801    |
| 3 | 10.257 | 109.8  | 21.6   | 0.0848 | 2.398  | 0.896    |

### Analytical HPLC (5-50% gradient)

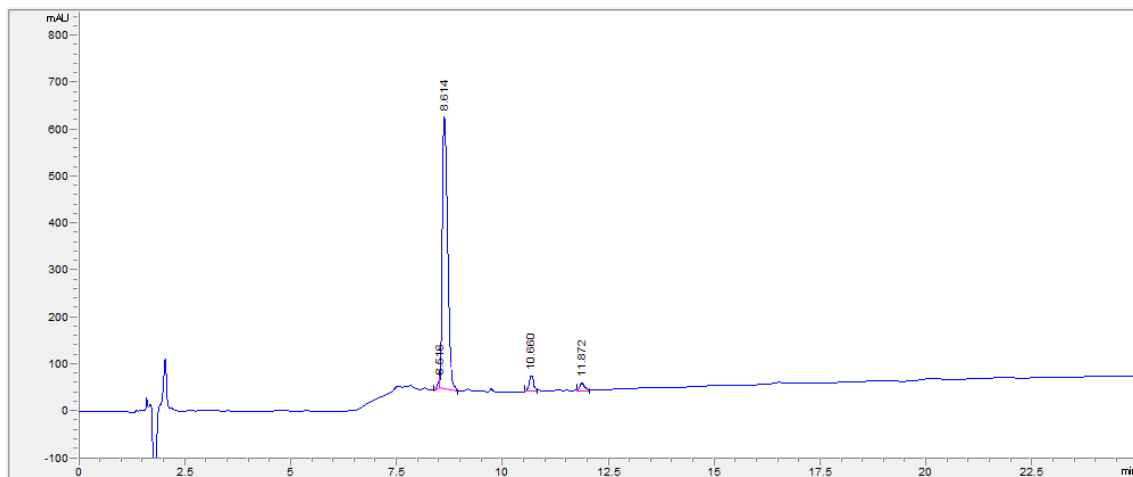

| # | Time   | Area   | Height | Width  | Area%  | Symmetry |
|---|--------|--------|--------|--------|--------|----------|
| 1 | 8.516  | 92.3   | 17.9   | 0.0858 | 1.654  | 1.228    |
| 2 | 8.614  | 5027.7 | 581    | 0.1442 | 90.059 | 0.58     |
| 3 | 10.66  | 292.8  | 34     | 0.1434 | 5.244  | 0.759    |
| 4 | 11.872 | 169.9  | 18.7   | 0.1514 | 3.043  | 0.617    |

## Ac-KAAO<sub>x</sub>AA-KAAAA-KAAAA-KGY-NH<sub>2</sub> (20)

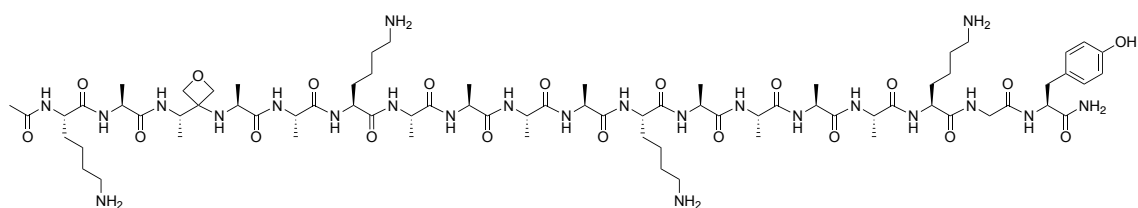

### Analytical HPLC (5-95% gradient)

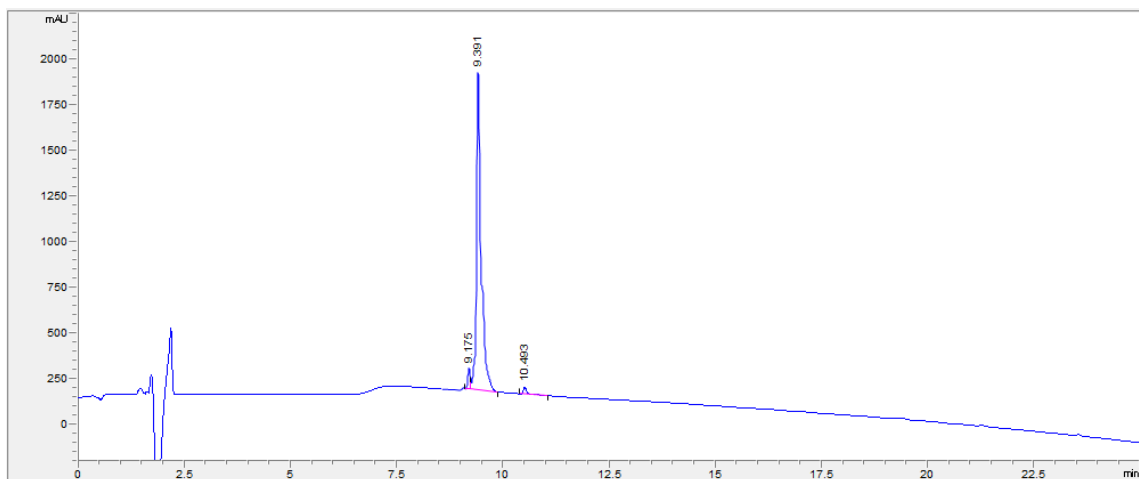

| # | Time   | Area    | Height | Width  | Area%  | Symmetry |
|---|--------|---------|--------|--------|--------|----------|
| 1 | 9.175  | 479.8   | 114.9  | 0.0647 | 3.423  | 0.845    |
| 2 | 9.391  | 13290.4 | 1741.4 | 0.109  | 94.829 | 0.508    |
| 3 | 10.493 | 245     | 38.4   | 0.0945 | 1.748  | 0.536    |

### Analytical HPLC (5-50% gradient)

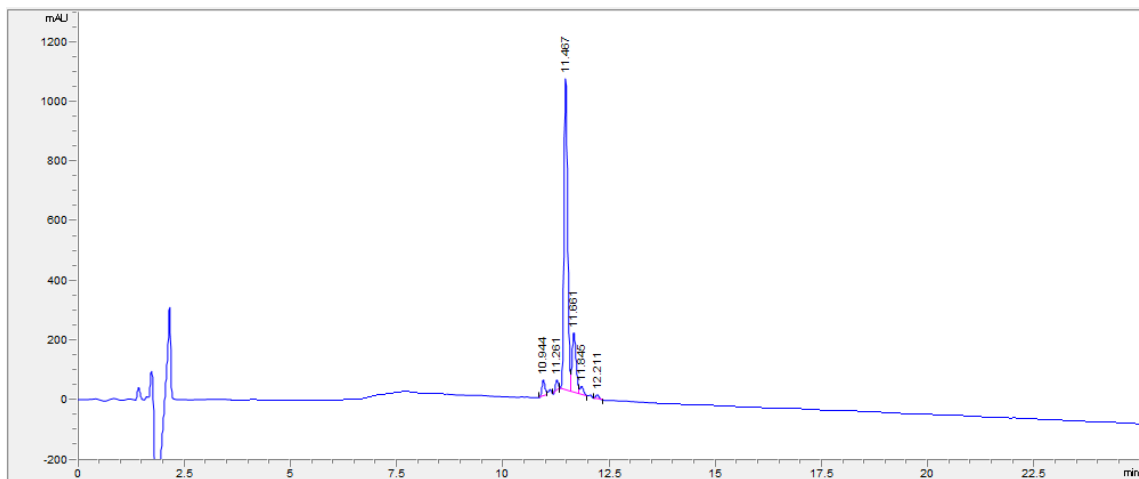

| # | Time   | Area   | Height | Width  | Area%  | Symmetry |
|---|--------|--------|--------|--------|--------|----------|
| 1 | 10.944 | 300.1  | 55.7   | 0.0809 | 3.705  | 0.728    |
| 2 | 11.261 | 172.1  | 36.6   | 0.0769 | 2.125  | 1.063    |
| 3 | 11.467 | 6127.7 | 1043.2 | 0.0925 | 75.667 | 0.749    |
| 4 | 11.661 | 1284.4 | 197.6  | 0.0978 | 15.861 | 0.723    |
| 5 | 11.845 | 135.2  | 25.5   | 0.0798 | 1.670  | 0.739    |
| 6 | 12.211 | 78.7   | 14.5   | 0.0875 | 0.972  | 0.757    |



## Ac-KAGO<sub>x</sub>AA-KAAAA-KAAAA-KGY-NH<sub>2</sub> (21)

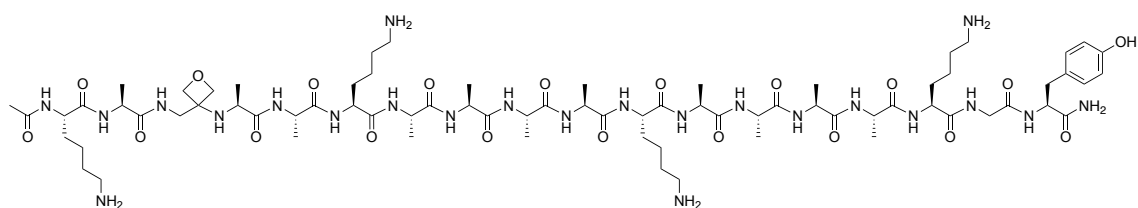

### Analytical HPLC (5-95% gradient)

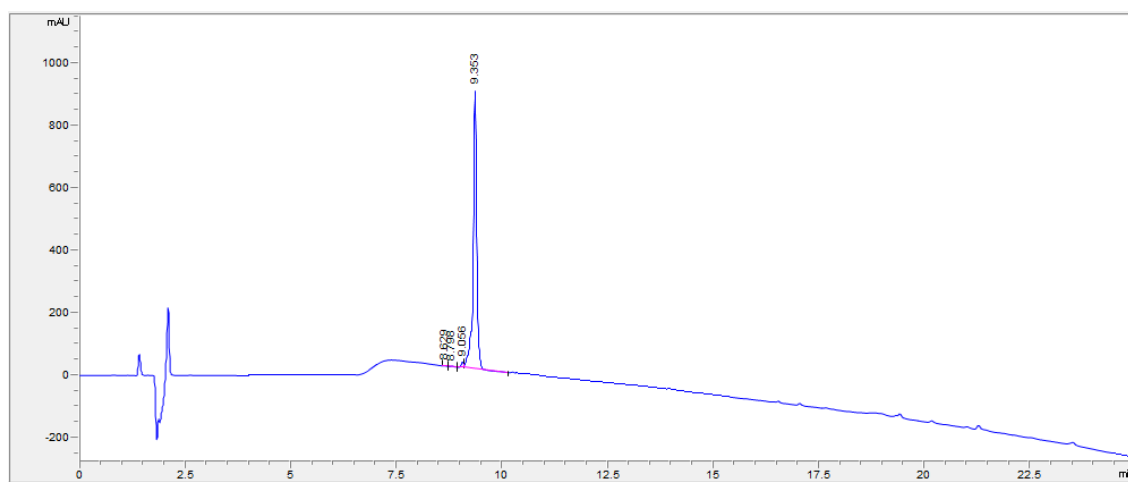

| # | Time  | Area   | Height | Width  | Area%  | Symmetry |
|---|-------|--------|--------|--------|--------|----------|
| 1 | 8.629 | 16.3   | 3.2    | 0.075  | 0.300  | 0.668    |
| 2 | 8.798 | 11.7   | 2.1    | 0.0815 | 0.216  | 0.427    |
| 3 | 9.056 | 86.1   | 19     | 0.0669 | 1.586  | 1.094    |
| 4 | 9.353 | 5313.7 | 895.1  | 0.0873 | 97.898 | 1.12     |

### Analytical HPLC (5-50% gradient)

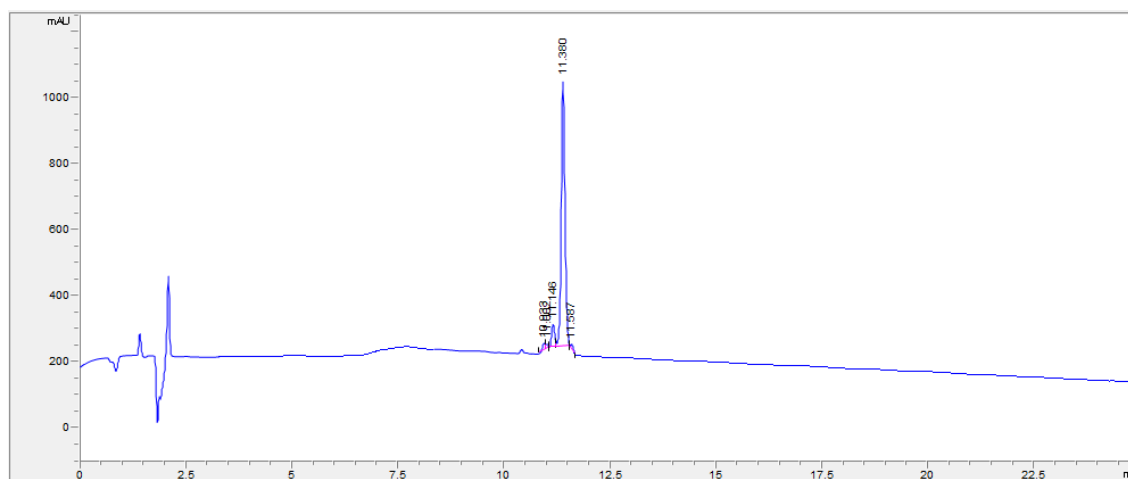

| # | Time   | Area   | Height | Width  | Area%  | Symmetry |
|---|--------|--------|--------|--------|--------|----------|
| 1 | 10.933 | 102.9  | 22.4   | 0.0696 | 1.857  | 1.332    |
| 2 | 11.002 | 51.6   | 14.6   | 0.0552 | 0.931  | 0.998    |
| 3 | 11.146 | 367.4  | 69.3   | 0.0838 | 6.630  | 0.796    |
| 4 | 11.38  | 4968.7 | 803.4  | 0.0942 | 89.666 | 0.833    |
| 5 | 11.587 | 50.7   | 13.1   | 0.0631 | 0.915  | 0.419    |

## 4. General procedures

### General procedure 1: Synthesis of cumyl esters with 2-phenylisopropyltrichloroacetimidate

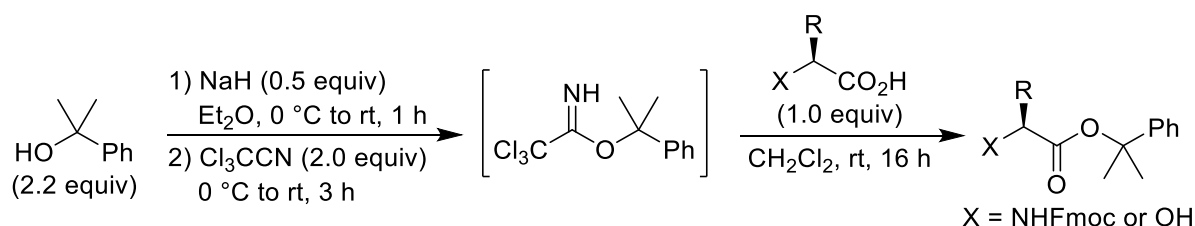

Cumyl esters were prepared following a modified procedure by Potier and co-workers.<sup>4</sup> To sodium hydride (60% dispersion in mineral oil, 0.5 equiv) in Et<sub>2</sub>O (0.5 M) at 0 °C was added 2-phenyl-2-propanol (2.2 equiv) in Et<sub>2</sub>O (2.0 M) and the mixture was stirred at room temperature for 1 h. The reaction mixture was cooled to 0 °C, trichloroacetonitrile (2.0 equiv) was added slowly and stirring was continued for 3 h at room temperature. The solvent was removed under reduced pressure and the residue re-dissolved in petroleum ether (4.0 M), MeOH (0.5 equiv) was added dropwise and this mixture was stirred at room temperature for 10 min. The reaction mixture was filtered through a plug of Celite eluting with petroleum ether. The filtrate was concentrated under reduced pressure to give the crude imidate. To the crude imidate in CH<sub>2</sub>Cl<sub>2</sub> (0.15 M) was added a carboxylic acid (1.0 equiv) and the reaction mixture was stirred at room temperature for 16 h. The mixture was filtered through a plug of Celite eluting with CH<sub>2</sub>Cl<sub>2</sub> to remove precipitated trichloroacetamide. The crude product was concentrated *in vacuo* and purified by column chromatography (SiO<sub>2</sub>, PE/EtOAc or toluene/EtOAc) to give the pure cumyl ester.

### General procedure 2: Synthesis of benzyl esters

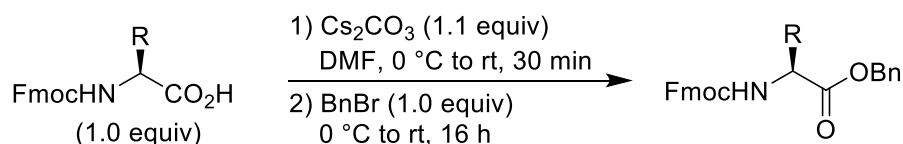

To a solution of Fmoc-protected amino acid (1.0 equiv) in DMF (0.25 M) was added Cs<sub>2</sub>CO<sub>3</sub> (1.1 equiv) at 0 °C, the mixture was allowed to warm to room temperature and stirred for 30 min. Benzyl bromide (1.0 equiv) was added slowly at 0 °C, the mixture was allowed to warm to room temperature and stirred for 16 h. The mixture was filtered through a plug of Celite eluting with diethyl ether. The filtrate was washed with water, the aqueous phase was extracted with diethyl ether (2 × 5.0 mL/mmol), the combined organic layers were washed with water (2 × 5.0 mL/mmol) and brine (5.0 mL/mmol), dried over Na<sub>2</sub>SO<sub>4</sub>, filtered, and concentrated under reduced pressure. The crude product was used without further purification.

### General procedure 3: Synthesis of oxetane containing nitro amino cumyl esters

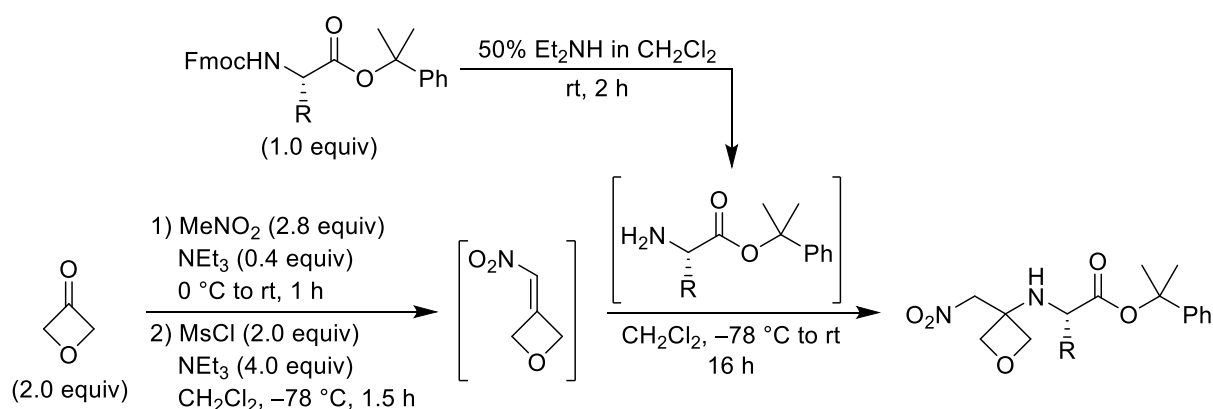

An *N*-Fmoc amino cumyl ester (1.0 equiv) in 50% diethylamine/CH<sub>2</sub>Cl<sub>2</sub> (0.5 M) was stirred at room temperature for 2 h. The reaction mixture was concentrated under reduced pressure and the resulting residue repeatedly dissolved in CH<sub>2</sub>Cl<sub>2</sub> (3 × 5.0 mL/mmol) and concentrated under reduced pressure to give the crude amine. Meanwhile in a second reaction vessel, oxetan-3-one (2.0 equiv), nitromethane (2.8 equiv) and triethylamine (0.4 equiv) were combined at 0 °C and stirred for 1 h at room temperature. CH<sub>2</sub>Cl<sub>2</sub> (0.2 M) was added and the reaction mixture cooled to -78 °C. Triethylamine (4.0 equiv) was added followed by the dropwise addition of a solution of methanesulfonyl chloride (2.0 equiv) in CH<sub>2</sub>Cl<sub>2</sub> (1.0 M). The reaction mixture was stirred at -78 °C for 1.5 h. The crude amine in CH<sub>2</sub>Cl<sub>2</sub> (0.25 M) was added slowly to the oxetane mixture *via* syringe at -78 °C, the reaction mixture was allowed to reach room temperature and stirred for 16 h. A saturated solution of NH<sub>4</sub>Cl (8 mL/mmol) was added and stirred for 10 min. The layers were separated and the aqueous extracted with CH<sub>2</sub>Cl<sub>2</sub> (2 × 5.0 mL/mmol) and EtOAc (2 × 5.0 mL/mmol). The combined organic layers were washed with saturated NaHCO<sub>3</sub> (2 × 8.0 mL/mmol), then brine (5.0 mL/mmol), dried over MgSO<sub>4</sub>, filtered and concentrated *in vacuo*, and the crude product purified by column chromatography (SiO<sub>2</sub>, PE/EtOAc).

### General procedure 4: Nitro reduction and Fmoc protection using H<sub>2</sub>/Raney Ni

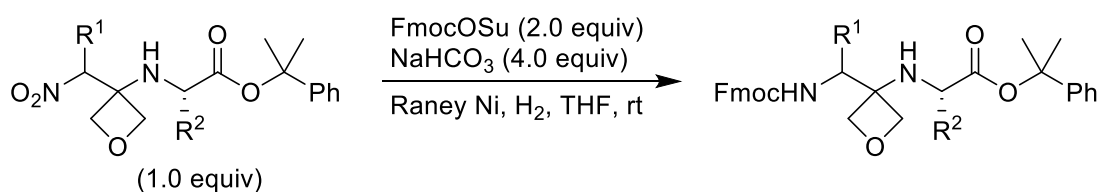

To a nitro alkane (1.0 equiv) in THF (0.1 M) was added Fmoc *N*-hydroxysuccinimide ester (2.0 equiv), NaHCO<sub>3</sub> (4.0 equiv) and Raney Ni (1.0 mL/mmol, slurry in H<sub>2</sub>O). The reaction mixture was placed under an atmosphere of nitrogen, evacuated, filled with hydrogen (balloon) and stirred at room temperature until full conversion of the starting material (MS monitoring). The reaction mixture was filtered through a plug of Celite eluting with EtOAc. The filtrate was washed with saturated Na<sub>2</sub>CO<sub>3</sub> (3 × 8.0 mL/mmol) and brine (5.0 mL/mmol), dried over MgSO<sub>4</sub>, filtered, concentrated under reduced pressure, and the crude product was purified by column chromatography (SiO<sub>2</sub>, CH<sub>2</sub>Cl<sub>2</sub>/EtOAc).

**General procedure 5:** Nitro reduction and Fmoc protection using Zn/AcOH

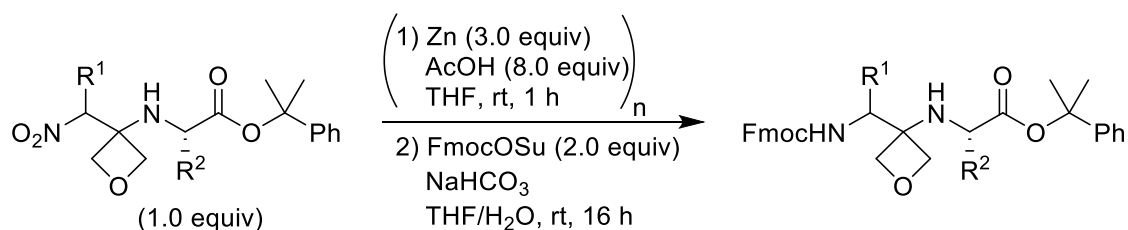

To a solution of nitro alkane (1.0 equiv) in THF (0.05 M) was added zinc powder (3.0 equiv) and acetic acid (8.0 equiv) and the reaction mixture was vigorously stirred with a glass-coated magnetic stir bar at room temperature for 1h. Additional zinc powder (3.0 equiv) and acetic acid (8.0 equiv) were added and the mixture was stirred at ambient temperature for 1 h (repeat until all starting material has been consumed, MS monitoring). The mixture was cooled to 0 °C and saturated aqueous NaHCO<sub>3</sub> solution (20 mL/mmol) was added followed by Fmoc *N*-hydroxysuccinimide ester (2.0 equiv) and the solution was stirred for 16 h at room temperature. Brine (15 mL/mmol) was added and the mixture as extracted with EtOAc (3 × 10 mL/mmol). The combined organic layers were washed with saturated aqueous NaHCO<sub>3</sub> solution (20 mL/mmol) and brine (20 mL/mmol), dried over MgSO<sub>4</sub>, filtered, concentrated *in vacuo*, and the crude product was purified by column chromatography (SiO<sub>2</sub>, CH<sub>2</sub>Cl<sub>2</sub>/EtOAc).

## 5. Synthesis and characterisation of oxetane modified glycine building blocks

### 5.1 Synthesis of Fmoc-GOx-Glu(*t*Bu)-OCumyl

#### Fmoc-Glu(*t*Bu)-OCumyl (**1a**)

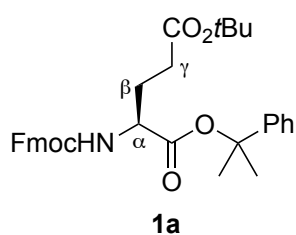

Following general procedure 1, Fmoc-Glu(*t*Bu)-OH (6.38 g, 15.0 mmol, 1.0 equiv) gave, after column chromatography (SiO<sub>2</sub>, PE/EtOAc 9:1→4:1), **1a** (5.95 g, 10.9 mmol, 73%) contaminated with traces of 2-phenyl-2-propanol as a pale yellow viscous oil. **R<sub>f</sub>** (PE/EtOAc 2:1) 0.49; **<sup>1</sup>H NMR** (400 MHz, CDCl<sub>3</sub>) δ<sub>H</sub> 7.76 (d, *J* = 7.4 Hz, 2H, ArH), 7.58 (d, *J* = 7.4 Hz, 2H, ArH), 7.41–7.28 (m, 9H, ArH), 5.39 (d, *J* = 7.9 Hz, 1H, NH), 4.56–4.23 (m, 3H, CH<sub>2</sub>-Fmoc, CH<sub>α</sub>-Glu), 4.20 (t, *J* = 6.9 Hz, 1H, CH-Fmoc), 2.48–2.09 (m, 3H, CH<sub>2</sub>γ-Glu, CHHβ-Glu), 2.03–1.90 (m, 1H, CHHβ-Glu), 1.82 (s, 3H, CH<sub>3</sub>, cumyl), 1.80 (s, 3H, CH<sub>3</sub>, cumyl), 1.47 (s, 9H, 3 × CH<sub>3</sub>, *t*Bu); **<sup>13</sup>C NMR** (101 MHz, CDCl<sub>3</sub>) δ<sub>C</sub> 172.3 (C=O), 170.7 (C=O), 156.1 (C=O, Fmoc), 145.0 (C), 144.0 (C), 143.9 (C), 141.4 (C), 128.5 (CH), 128.4 (CH), 127.8 (CH), 127.5 (CH), 127.2 (CH), 126.8 (CH), 125.3 (CH), 124.5 (CH), 120.1 (CH), 83.6 (C, cumyl), 80.9 (C, *t*Bu), 67.2 (CH<sub>2</sub>, Fmoc), 54.0 (CH, α-Glu), 47.3 (CH, Fmoc), 31.6 (CH<sub>2</sub>, γ-Glu), 28.8 (CH<sub>3</sub>, cumyl), 28.3 (CH<sub>3</sub>, cumyl), 28.2 (CH<sub>3</sub>, *t*Bu), 27.9 (CH<sub>2</sub>, β-Glu). *N.B.* One aromatic C not observed; **v<sub>max</sub>** (neat) = 3340 (NH), 2977, 1720 (C=O), 1514, 1448, 1366, 1249, 1136, 957, 841, 739, 698 cm<sup>-1</sup>; **MS** (ESI<sup>+</sup>) *m/z* 494 [M+Na]<sup>+</sup>, 510 [M+K]<sup>+</sup>; **HRMS** (ESI<sup>+</sup>) calcd. for C<sub>30</sub>H<sub>33</sub>NNaO<sub>4</sub> [M+Na]<sup>+</sup> 494.2302, found 494.2299; [α]<sub>D</sub><sup>26</sup> -0.1 (*c* 1.03, CHCl<sub>3</sub>).

#### NO<sub>2</sub>-GOx-Glu(*t*Bu)-OCumyl (**2a**)

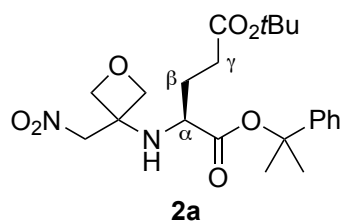

Following general procedure 3, **1a** (5.97 g, 10.9 mmol, 1.0 equiv), oxetan-3-one (1.28 mL, 20.0 mmol, 1.8 equiv) and nitromethane (1.52 mL, 28.0 mmol, 2.5 equiv) were combined to give, after column chromatography (SiO<sub>2</sub>, PE/EtOAc 4:1→2:1), **2a** (2.36 g, 5.41 mmol, 49%) as an orange oil. **R<sub>f</sub>** (PE/EtOAc 2:1) 0.27; **<sup>1</sup>H NMR** (400 MHz, CDCl<sub>3</sub>) δ<sub>H</sub> 7.39–7.31 (m, 4H, ArH), 7.29–7.24 (m, 1H, ArH), 4.78 (d, *J* = 12.8 Hz, 1H, NO<sub>2</sub>CHH), 4.71 (d, *J* = 12.8 Hz, 1H, NO<sub>2</sub>CHH), 4.56 (d, *J* = 7.1 Hz, 1H, OCHH-Ox), 4.52 (d, *J* = 7.1 Hz, 1H, OCHH-Ox), 4.43 (d, *J* = 7.1 Hz, 1H, OCHH-Ox), 4.39 (d, *J* = 7.1 Hz, 1H, OCHH-Ox), 3.55 (t, *J* = 10.1 Hz, 1H, CH<sub>α</sub>-Glu), 2.38–2.28 (m, 2H, CH<sub>2</sub>γ-Glu), 2.25 (d, *J* = 10.5 Hz, 1H, NH), 2.04 (dd, *J* = 13.5, 6.3 Hz, 1H, CHHβ-Glu), 1.80 (s, 6H, 2 × CH<sub>3</sub>, cumyl), 1.70 (dd, *J* = 13.5, 7.4 Hz, 1H, CHHβ-Glu), 1.46 (s, 9H, 3 × CH<sub>3</sub>, *t*Bu); **<sup>13</sup>C NMR** (101 MHz, CDCl<sub>3</sub>) δ<sub>C</sub> 174.0 (C=O), 172.5 (C=O), 144.8 (C), 128.5 (CH), 127.6 (CH), 124.5 (CH), 83.2 (C, cumyl), 80.7 (C, *t*Bu), 78.9 (NO<sub>2</sub>CH<sub>2</sub>, OCH<sub>2</sub>), 78.6 (OCH<sub>2</sub>), 59.5 (C, Ox), 55.4 (CH, α-Glu), 31.5 (CH<sub>2</sub>, γ-Glu), 29.4 (CH<sub>2</sub>, β-Glu), 28.4 (CH<sub>3</sub>, cumyl), 28.2 (CH<sub>3</sub>, *t*Bu); **v<sub>max</sub>** (neat) = 3331 (NH), 2978, 1723 (C=O), 1555, 1367, 1272, 1137, 979, 836, 763, 700 cm<sup>-1</sup>; **MS** (ESI<sup>+</sup>) *m/z* 437 [M+H]<sup>+</sup>, 459 [M+Na]<sup>+</sup>, 475 [M+K]<sup>+</sup>; **HRMS** (ESI<sup>+</sup>) calcd. for C<sub>22</sub>H<sub>32</sub>N<sub>2</sub>NaO<sub>7</sub> [M+Na]<sup>+</sup> 459.2102, found 459.2105; [α]<sub>D</sub><sup>28</sup> -0.8 (*c* 0.22, CHCl<sub>3</sub>).

### Fmoc-GOx-Glu(*t*Bu)-OCumyl (**3a**)

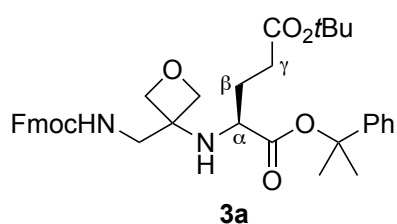

Following general procedure 4, **2a** (2.22 g, 5.09 mmol, 1.0 equiv) gave, after column chromatography (SiO<sub>2</sub>, CH<sub>2</sub>Cl<sub>2</sub>/EtOAc 9:1→4:1), **3a** (1.38 g, 2.19 mmol, 43%) as a colourless oil. **R<sub>f</sub>** (CH<sub>2</sub>Cl<sub>2</sub>/EtOAc 9:1) 0.32; **<sup>1</sup>H NMR** (400 MHz, CDCl<sub>3</sub>) δ<sub>H</sub> 7.77 (d, *J* = 7.4 Hz, 2H, ArH), 7.61 (d, *J* = 7.4 Hz, 2H, ArH), 7.43–7.26 (m, 9H, ArH), 5.44 (t, *J* = 7.0 Hz, 1H, NH), 4.46–4.35 (m, 3H, CH<sub>2</sub>-Fmoc, CHH-Ox), 4.31 (s, 2H, CH<sub>2</sub>-Ox), 4.27–4.16 (m, 2H, CHH-Ox, CH-Fmoc), 3.66 (dd, *J* = 13.6, 5.1 Hz, 1H, CHHGOx), 3.45 (dd, *J* = 13.6, 4.1 Hz, 1H, CHHGOx), 3.38 (dd, *J* = 8.0, 3.3 Hz, 1H, CH<sub>α</sub>-Glu), 2.48–2.31 (m, 2H, CH<sub>2</sub>γ-Glu), 2.14–1.92 (m, 2H, CHHβ-Glu, NH), 1.80 (s, 6H, 2 × CH<sub>3</sub>, cumyl), 1.79–1.72 (m, 1H, CHHβ-Glu), 1.47 (s, 9H, 3 × CH<sub>3</sub>, *t*Bu); **<sup>13</sup>C NMR** (101 MHz, CDCl<sub>3</sub>) δ<sub>C</sub> 174.7 (C=O), 172.7 (C=O), 157.1 (C=O, Fmoc), 144.8 (C), 144.09 (C), 144.05 (C), 141.4 (C), 128.5 (CH), 127.8 (CH), 127.6 (CH), 127.2 (CH), 125.3 (CH), 124.4 (CH), 120.1 (CH), 83.1 (C, cumyl), 80.8 (C, *t*Bu), 79.8 (OCH<sub>2</sub>), 79.6 (OCH<sub>2</sub>), 67.0 (CH<sub>2</sub>, Fmoc), 59.6 (C, Ox), 55.4 (CH, α-Glu), 47.3 (CH, Fmoc), 45.5 (CH<sub>2</sub>, GOx), 32.1 (CH<sub>2</sub>, γ-Glu), 29.6 (CH<sub>2</sub>, β-Glu), 28.4 (CH<sub>3</sub>, cumyl), 28.3 (CH<sub>3</sub>, cumyl), 28.2 (CH<sub>3</sub>, *t*Bu). *N.B.* One aromatic C not observed; **v<sub>max</sub>** (neat) = 3332 (NH), 2977, 1720 (C=O), 1518, 1449, 1366, 1240, 1133, 972, 838, 740, 699 cm<sup>-1</sup>; **MS** (ESI<sup>+</sup>) *m/z* 629 [M+H]<sup>+</sup>, 651 [M+Na]<sup>+</sup>, 667 [M+K]<sup>+</sup>; **HRMS** (ESI<sup>+</sup>) calcd. for C<sub>37</sub>H<sub>44</sub>N<sub>2</sub>NaO<sub>7</sub> [M+Na]<sup>+</sup> 651.3041, found 651.3039; [α]<sub>D</sub><sup>26</sup> +0.7 (*c* 1.00, CHCl<sub>3</sub>).

### 5.2 Synthesis of Fmoc-GOx-Ile-OCumyl

#### Fmoc-Ile-OCumyl (**1b**)

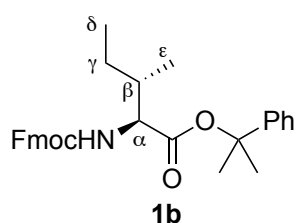

Following general procedure 1, Fmoc-Ile-OH (5.30 g, 15.0 mmol, 1.0 equiv) gave, after column chromatography (SiO<sub>2</sub>, PE/EtOAc 9:1→4:1), **1b** (6.26 g, 13.3 mmol, 89%) as a white solid. **R<sub>f</sub>** (PE/EtOAc 4:1) 0.37; **<sup>1</sup>H NMR** (400 MHz, CDCl<sub>3</sub>) δ<sub>H</sub> 7.76 (d, *J* = 7.4 Hz, 2H, ArH), 7.58 (d, *J* = 7.4 Hz, 2H, ArH), 7.43–7.27 (m, 9H, ArH), 5.26 (d, *J* = 8.7 Hz, 1H, NH), 4.60–4.27 (m, 3H, CH<sub>α</sub>-Ile, CH<sub>2</sub>-Fmoc), 4.22 (t, *J* = 7.0 Hz, 1H, CH-Fmoc), 1.96 (br. m, 1H, CHβ-Ile), 1.82 (s, 3H, CH<sub>3</sub>, cumyl), 1.81 (s, 3H, CH<sub>3</sub>, cumyl), 1.46–1.34 (m, 1H, CHHγ-Ile), 1.23–1.13 (m, 1H, CHHγ-Ile), 1.01–0.86 (m, 6H, CH<sub>3</sub>δ-Ile, CH<sub>3</sub>ε-Ile); **<sup>13</sup>C NMR** (101 MHz, CDCl<sub>3</sub>) δ<sub>C</sub> 170.8 (C=O), 156.3 (C=O, Fmoc), 145.2 (C), 144.1 (C), 144.0 (C), 141.4 (C), 128.4 (CH), 127.8 (CH), 127.5 (CH), 127.2 (CH), 125.3 (CH), 124.6 (CH), 120.1 (CH), 83.3 (C, cumyl), 67.1 (CH<sub>2</sub>, Fmoc), 58.9 (CH, α-Ile), 47.4 (CH, Fmoc), 38.4 (CH, β-Ile), 28.6 (CH<sub>3</sub>, cumyl), 28.4 (CH<sub>3</sub>, cumyl), 24.9 (CH<sub>2</sub>, γ-Ile), 15.7 (CH<sub>3</sub>, ε-Ile), 11.9 (CH<sub>3</sub>, δ-Ile). *N.B.* One aromatic C not observed; **v<sub>max</sub>** (neat) = 3346 (NH), 2963, 1706 (C=O), 1536, 1448, 1342, 1245, 1202, 1134, 1086, 1042, 825, 757, 737, 697 cm<sup>-1</sup>; **MS** (ESI<sup>+</sup>) *m/z* 566 [M+Na]<sup>+</sup>, 582 [M+K]<sup>+</sup>; **HRMS** (ESI<sup>+</sup>) calcd. for C<sub>33</sub>H<sub>37</sub>NNaO<sub>6</sub> [M+Na]<sup>+</sup> 566.2513, found 566.2507; [α]<sub>D</sub><sup>28</sup> –2.5 (*c* 0.63, CHCl<sub>3</sub>).

### NO<sub>2</sub>-GOx-Ile-OCumyl (**2b**)

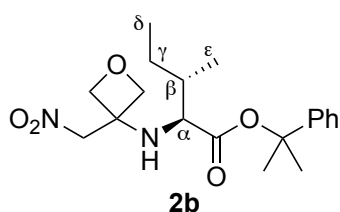

Following general procedure 3, **1b** (5.75 g, 12.2 mmol, 1.0 equiv), oxetan-3-one (1.54 mL, 24.0 mmol, 2.0 equiv) and nitromethane (1.82 mL, 33.6 mmol, 2.8 equiv) were combined to give, after column chromatography (SiO<sub>2</sub>, PE/EtOAc 9:1→4:1→2:1), **2b** (3.26 g, 8.95 mmol, 73%) as an orange oil. **R<sub>f</sub>** (PE/EtOAc 2:1) 0.14; <sup>1</sup>H NMR (400 MHz, CDCl<sub>3</sub>) δ<sub>H</sub> 7.42–7.30 (m, 4H, ArH), 7.29–7.26 (m, 1H, ArH), 4.77 (d, *J* = 12.7 Hz, 1H, NO<sub>2</sub>CHH), 4.66 (d, *J* = 12.7 Hz, 1H, NO<sub>2</sub>CHH), 4.56 (d, *J* = 7.0 Hz, 1H, OCHH-Ox), 4.48 (d, *J* = 7.0 Hz, 1H, OCHH-Ox), 4.43 (d, *J* = 7.0 Hz, 2H, 2 × OCHH-Ox), 3.36 (d, *J* = 2.9 Hz, 1H, CH<sub>α</sub>-Ile), 2.24 (br. s, 1H, NH), 1.82 (s, 3H, CH<sub>3</sub>, cumyl), 1.80 (s, 3H, CH<sub>3</sub>, cumyl), 1.78–1.72 (m, 1H, CH<sub>β</sub>-Ile), 1.42–1.31 (m, 1H, CHH<sub>γ</sub>-Ile), 1.07 (dq, *J* = 10.8, 7.4 Hz, 1H, CHH<sub>γ</sub>-Ile), 0.93 (d, *J* = 7.2 Hz, 3H, CH<sub>3</sub><sub>ε</sub>-Ile), 0.90 (t, *J* = 7.4 Hz, 3H, CH<sub>3</sub><sub>δ</sub>-Ile); <sup>13</sup>C NMR (101 MHz, CDCl<sub>3</sub>) δ<sub>C</sub> 174.1 (C=O), 144.9 (C), 128.4 (CH), 127.6 (CH), 124.7 (CH), 82.9 (C, cumyl), 79.2 (NO<sub>2</sub>CH<sub>2</sub>), 78.8 (OCH<sub>2</sub>), 78.5 (OCH<sub>2</sub>), 60.7 (CH, α-Ile), 59.7 (C, Ox), 39.2 (CH, β-Ile), 28.5 (CH<sub>3</sub>, cumyl), 28.0 (CH<sub>3</sub>, cumyl), 24.5 (CH<sub>2</sub>, γ-Ile), 16.0 (CH<sub>3</sub>, ε-Ile), 11.9 (CH<sub>3</sub>, δ-Ile); **v<sub>max</sub>** (neat) = 3346 (NH), 2963, 1707 (C=O), 1536, 1449, 1342, 1246, 1202, 1133, 1086, 828, 757, 697 cm<sup>-1</sup>; **MS** (ESI<sup>+</sup>) *m/z* 387 [M+Na]<sup>+</sup>, 403 [M+K]<sup>+</sup>; **HRMS** (ESI<sup>+</sup>) calcd. for C<sub>19</sub>H<sub>28</sub>N<sub>2</sub>NaO<sub>5</sub> [M+Na]<sup>+</sup> 387.1890, found 387.1894; [α]<sub>D</sub><sup>28</sup> -3.6 (*c* 0.69, CHCl<sub>3</sub>).

### Fmoc-GOx-Ile-OCumyl (**3b**)

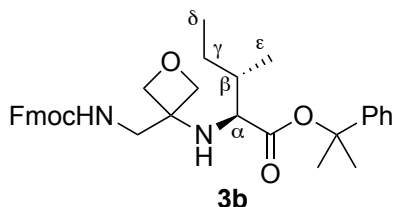

Following general procedure 4, **2b** (3.15 g, 8.64 mmol, 1.0 equiv) gave, after column chromatography (SiO<sub>2</sub>, CH<sub>2</sub>Cl<sub>2</sub>/EtOAc 19:1→9:1→4:1), **3b** (1.50 g, 2.69 mmol, 31%) as a sticky colourless oil. **R<sub>f</sub>** (CH<sub>2</sub>Cl<sub>2</sub>/EtOAc 9:1) 0.23; <sup>1</sup>H NMR (400 MHz, CDCl<sub>3</sub>) δ<sub>H</sub> 7.77 (d, *J* = 7.4 Hz, 2H, ArH), 7.59 (d, *J* = 6.8 Hz, 2H, ArH), 7.43–7.27 (m, 9H, ArH), 5.24 (t, *J* = 5.3 Hz, 1H, NH), 4.47–4.18 (m, 7H, 2 × OCH<sub>2</sub>-Ox, CH<sub>2</sub>-Fmoc, CH-Fmoc), 3.70 (dd, *J* = 13.4, 5.7 Hz, 1H, CHHGOx), 3.36 (dd, *J* = 13.4, 3.7 Hz, 1H, CHHGOx), 3.22 (d, *J* = 3.5 Hz, 1H, CH<sub>α</sub>-Ile), 1.96 (br. s, 1H, NH), 1.83 (s, 3H, CH<sub>3</sub>, cumyl), 1.80 (s, 3H, CH<sub>3</sub>, cumyl), 1.80–1.74 (m, 1H, CH<sub>β</sub>-Ile), 1.46–1.37 (m, 1H, CHH<sub>γ</sub>-Ile), 1.19–1.09 (m, 1H, CHH<sub>γ</sub>-Ile), 1.00 (d, *J* = 6.3 Hz, 3H, CH<sub>3</sub><sub>ε</sub>-Ile), 0.94 (t, *J* = 7.0 Hz, 3H, CH<sub>3</sub><sub>δ</sub>-Ile); <sup>13</sup>C NMR (101 MHz, CDCl<sub>3</sub>) δ<sub>C</sub> 174.8 (C=O), 156.9 (C=O, Fmoc), 144.9 (C), 144.1 (C), 144.0 (C), 141.4 (C), 128.4 (CH), 127.8 (CH), 127.6 (CH), 127.1 (CH), 125.2 (CH), 124.6 (CH), 120.1 (CH), 82.9 (C, cumyl), 79.7 (OCH<sub>2</sub>), 79.5 (OCH<sub>2</sub>), 67.0 (CH<sub>2</sub>, Fmoc), 60.6 (CH, α-Ile), 59.5 (C, Ox), 47.3 (CH, Fmoc), 45.8 (CH<sub>2</sub>, GOx), 39.2 (CH, β-Ile), 28.6 (CH<sub>3</sub>, cumyl), 28.0 (CH<sub>3</sub>, cumyl), 24.6 (CH<sub>2</sub>, γ-Ile), 16.2 (CH<sub>3</sub>, ε-Ile), 11.9 (CH<sub>3</sub>, δ-Ile). *N.B.* One aromatic C not observed; **v<sub>max</sub>** (neat) = 3334 (NH), 2961, 1720 (C=O), 1515, 1448, 1237, 1130, 972, 739, 698 cm<sup>-1</sup>; **MS** (ESI<sup>+</sup>) *m/z* 557 [M+H]<sup>+</sup>, 579 [M+Na]<sup>+</sup>, 595 [M+K]<sup>+</sup>; **HRMS** (ESI<sup>+</sup>) calcd. for C<sub>34</sub>H<sub>40</sub>N<sub>2</sub>NaO<sub>5</sub> [M+Na]<sup>+</sup> 579.2829, found 579.2826; [α]<sub>D</sub><sup>29</sup> +10.9 (*c* 0.58, CHCl<sub>3</sub>).

### 5.3 Synthesis of Fmoc-GOx-Leu-OCumyl

#### Fmoc-Leu-OCumyl (**1c**)

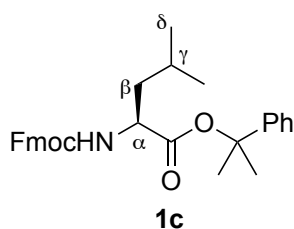

Following general procedure 1, Fmoc-Leu-OH (7.07 g, 20.0 mmol, 1.0 equiv) gave, after column chromatography (SiO<sub>2</sub>, PE/EtOAc 9:1→4:1), **1c** (8.61 g, 18.3 mmol, 91%) as a viscous colourless oil. **R<sub>f</sub>** (PE/EtOAc 4:1) 0.29; **<sup>1</sup>H NMR** (400 MHz, CDCl<sub>3</sub>) δ<sub>H</sub> 7.75 (d, *J* = 7.4 Hz, 2H, ArH), 7.57 (d, *J* = 7.4 Hz, 2H, ArH), 7.41–7.23 (m, 9H, ArH), 5.13 (d, *J* = 8.6 Hz, 1H, NH), 4.42–4.35 (m, 3H, CH<sub>2</sub>-Fmoc, CH<sub>α</sub>-Leu), 4.20 (t, *J* = 6.8 Hz, 1H, CH-Fmoc), 1.79 (s, 6H, 2 × CH<sub>3</sub>, cumyl), 1.73–1.61 (m, 2H, CH<sub>γ</sub>-Leu, CHH<sub>β</sub>-Leu), 1.56–1.46 (m, 1H, CHH<sub>β</sub>-Leu), 1.04–0.87 (m, 6H, 2 × CH<sub>3</sub>δ-Leu); **<sup>13</sup>C NMR** (101 MHz, CDCl<sub>3</sub>) δ<sub>C</sub> 171.8 (C=O), 156.1 (C=O, Fmoc), 145.3 (C), 144.1 (C), 143.9 (C), 141.4 (C), 128.5 (CH), 127.8 (CH), 127.4 (CH), 127.2 (CH), 125.2 (CH), 124.4 (CH), 120.1 (CH), 83.2 (C, cumyl), 67.0 (CH<sub>2</sub>, Fmoc), 53.0 (CH, α-Leu), 47.3 (CH, Fmoc), 42.0 (CH<sub>2</sub>, β-Leu), 28.59 (CH<sub>3</sub>, cumyl), 28.55 (CH<sub>3</sub>, cumyl), 24.9 (CH, γ-Leu), 23.1 (CH<sub>3</sub>, δ-Leu), 22.0 (CH<sub>3</sub>, δ-Leu). *N.B.* One aromatic C not observed; **v<sub>max</sub>** (neat) = 3343 (NH), 2958, 1707 (C=O), 1518, 1448, 1248, 1133, 1045, 739, 698 cm<sup>-1</sup>; **MS** (ESI<sup>+</sup>) *m/z* 494 [M+Na]<sup>+</sup>, 510 [M+K]<sup>+</sup>; **HRMS** (ESI<sup>+</sup>) calcd. for C<sub>30</sub>H<sub>33</sub>NNaO<sub>4</sub> [M+Na]<sup>+</sup> 494.2302, found 480.2294; [α]<sub>D</sub><sup>29</sup> -16.3 (*c* 0.61, CHCl<sub>3</sub>).

#### NO<sub>2</sub>-GOx-Leu-OCumyl (**2c**)

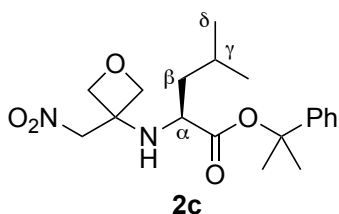

Following general procedure 3, **1c** (8.49 g, 18.0 mmol, 1.0 equiv), oxetan-3-one (2.31 mL, 36.0 mmol, 2.0 equiv) and nitromethane (2.73 mL, 50.4 mmol, 2.8 equiv) were combined to give, after column chromatography (SiO<sub>2</sub>, PE/EtOAc 4:1→2:1), **2c** (4.19 g, 11.5 mmol, 64%) as an orange oil. **R<sub>f</sub>** (PE/EtOAc 2:1) 0.44; **<sup>1</sup>H NMR** (400 MHz, CDCl<sub>3</sub>) δ<sub>H</sub> 7.38–7.32 (m, 4H, ArH), 7.30–7.22 (m, 1H, ArH), 4.80 (d, *J* = 12.6 Hz, 1H, NO<sub>2</sub>CHH), 4.72 (d, *J* = 12.6 Hz, 1H, NO<sub>2</sub>CHH), 4.57 (d, *J* = 7.0 Hz, 1H, OCHH-Ox), 4.52 (d, *J* = 7.1 Hz, 1H, OCHH-Ox), 4.46 (d, *J* = 7.1 Hz, 1H, OCHH-Ox), 4.36 (d, *J* = 7.0 Hz, 1H, OCHH-Ox), 3.47 (dd, *J* = 12.8, 8.4 Hz, 1H, CH<sub>α</sub>-Leu), 2.17 (d, *J* = 10.0 Hz, 1H, NH), 1.81 (s, 3H, CH<sub>3</sub>, cumyl), 1.78 (s, 3H, CH<sub>3</sub>, cumyl), 1.77–1.70 (m, 1H, CH<sub>γ</sub>-Leu), 1.54–1.46 (m, 1H, CHH<sub>β</sub>-Leu), 1.39–1.31 (m, 1H, CHH<sub>β</sub>-Leu), 0.94 (d, *J* = 6.9 Hz, 3H, CH<sub>3</sub>δ-Leu), 0.92 (d, *J* = 6.9 Hz, 3H, CH<sub>3</sub>δ-Leu); **<sup>13</sup>C NMR** (101 MHz, CDCl<sub>3</sub>) δ<sub>C</sub> 174.8 (C=O), 145.0 (C), 128.5 (CH), 127.6 (CH), 124.5 (CH), 82.9 (C, cumyl), 79.0 (NO<sub>2</sub>CH<sub>2</sub> or OCH<sub>2</sub>), 78.9 (NO<sub>2</sub>CH<sub>2</sub> or OCH<sub>2</sub>), 78.8 (OCH<sub>2</sub>), 59.7 (C, Ox), 54.9 (CH, α-Leu), 43.7 (CH<sub>2</sub>, β-Leu), 28.6 (CH<sub>3</sub>, cumyl), 27.9 (CH<sub>3</sub>, cumyl), 24.7 (CH, γ-Leu), 23.1 (CH<sub>3</sub>, δ-Leu), 22.2 (CH<sub>3</sub>, δ-Leu); **IR** (neat) = 3332 (NH), 2957, 1729 (C=O), 1555, 1381, 1271, 1193, 1132, 978, 763 cm<sup>-1</sup>; **MS** (ESI<sup>+</sup>) *m/z* 387 [M+Na]<sup>+</sup>, 403 [M+K]<sup>+</sup>; **HRMS** (ESI<sup>+</sup>) calcd. for C<sub>19</sub>H<sub>28</sub>N<sub>2</sub>NaO<sub>5</sub> [M+Na]<sup>+</sup> 387.1890, found 387.1884; [α]<sub>D</sub><sup>28</sup> -5.3 (*c* 0.10, CHCl<sub>3</sub>).



### Fmoc-GOx-Leu-OCumyl (**3c**)

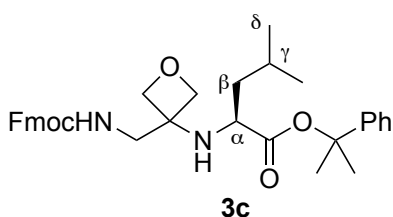

Following general procedure 4, **2c** (1.40 g, 3.84 mmol, 1.0 equiv) gave, after column chromatography (SiO<sub>2</sub>, CH<sub>2</sub>Cl<sub>2</sub>/EtOAc 19:1→9:1), **3c** (1.09 g, 1.96 mmol, 51%) as a sticky colourless oil. **R<sub>f</sub>** (CH<sub>2</sub>Cl<sub>2</sub>/EtOAc 9:1) 0.40; **<sup>1</sup>H NMR** (400 MHz, CDCl<sub>3</sub>) δ<sub>H</sub> 7.77 (d, *J* = 7.4 Hz, 2H, ArH), 7.58 (d, *J* = 7.4 Hz, 2H, ArH), 7.44–7.26 (m, 9H, ArH), 5.24 (t, *J* = 5.6 Hz, 1H, NH), 4.54–4.17 (m, 7H, 2 × OCH<sub>2</sub>-Ox, CH<sub>2</sub>CH-Fmoc), 3.71 (dd, *J* = 13.6, 5.7 Hz, 1H, CHHGOx), 3.41 (dd, *J* = 13.6, 4.1 Hz, 1H, CHHGOx), 3.33 (dd, *J* = 8.0, 5.0 Hz, 1H, CHα-Leu), 1.93–1.83 (m, 2H, CHγ-Leu, NH), 1.81 (s, 3H, CH<sub>3</sub>, cumyl), 1.78 (s, 3H, CH<sub>3</sub>, cumyl), 1.56–1.47 (m, 1H, CHHβ-Leu), 1.43–1.34 (m, 1H, CHHβ-Leu), 0.98 (d, *J* = 7.8 Hz, 3H, CH<sub>3</sub>δ-Leu), 0.96 (d, *J* = 8.5 Hz, 3H, CH<sub>3</sub>δ-Leu); **<sup>13</sup>C NMR** (101 MHz, CDCl<sub>3</sub>) δ<sub>C</sub> 175.6 (C=O), 156.9 (C=O, Fmoc), 145.0 (C), 144.1 (C), 144.0 (C), 141.4 (C), 128.5 (CH), 127.8 (CH), 127.5 (CH), 127.2 (CH), 125.2 (CH), 124.5 (CH), 120.1 (CH), 82.8 (C, cumyl), 80.0 (OCH<sub>2</sub>), 79.7 (OCH<sub>2</sub>), 67.0 (CH<sub>2</sub>, Fmoc), 59.5 (C, Ox), 54.6 (CH, α-Leu), 47.4 (CH, Fmoc), 45.6 (CH<sub>2</sub>, GOx), 43.8 (CH<sub>2</sub>, β-Leu), 28.6 (CH<sub>3</sub>, cumyl), 28.0 (CH<sub>3</sub>, cumyl), 24.9 (CH, γ-Leu), 23.3 (CH<sub>3</sub>, δ-Leu), 22.0 (CH<sub>3</sub>, δ-Leu). *N.B.* One aromatic C not observed; **v<sub>max</sub>** (neat) = 3331 (NH), 2954, 1720 (C=O), 1515, 1449, 1227, 1131, 971, 739, 699 cm<sup>-1</sup>; **MS** (ESI<sup>+</sup>) *m/z* 557 [M+H]<sup>+</sup>, 579 [M+Na]<sup>+</sup>, 595 [M+K]<sup>+</sup>; **HRMS** (ESI<sup>+</sup>) calcd. for C<sub>34</sub>H<sub>40</sub>N<sub>2</sub>NaO<sub>5</sub> [M+Na]<sup>+</sup> 579.2829, found 579.2824; [α]<sub>D</sub><sup>30</sup> +0.2 (*c* 0.52, CHCl<sub>3</sub>).

### 5.4 Synthesis of Fmoc-GOx-Asn(Trt)-OCumyl

#### Fmoc-Asn(Trt)-OCumyl (**1d**)

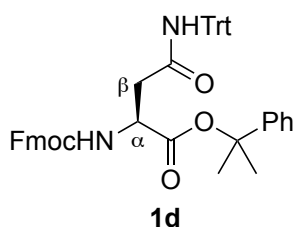

Following general procedure 1, Fmoc-Asn(Trt)-OH (5.97 g, 10.0 mmol, 1.0 equiv) gave, after column chromatography (SiO<sub>2</sub>, PE/EtOAc 4:1→2:1), **1d** (6.79 g, 9.50 mmol, 95%) as a white foam. **R<sub>f</sub>** (PE/EtOAc 2:1) 0.34; **mp** 101–103 °C; **<sup>1</sup>H NMR** (300 MHz, CDCl<sub>3</sub>) δ<sub>H</sub> 7.76 (d, *J* = 7.5 Hz, 2H, ArH), 7.59 (d, *J* = 7.5 Hz, 2H, ArH), 7.40 (t, *J* = 7.5 Hz, 2H, ArH), 7.33–7.20 (m, 16H, ArH), 7.19–7.12 (m, 6H, ArH), 6.68 (s, 1H, NH), 6.14 (d, *J* = 8.4 Hz, 1H, NH), 4.57 (dt, *J* = 8.8, 3.9 Hz, 1H, CHα-Asn), 4.42 (dd, *J* = 9.9, 7.4 Hz, 1H, CHH-Fmoc), 4.30 (dd, *J* = 9.9, 7.4 Hz, 1H, CHH-Fmoc), 4.20 (t, *J* = 7.4 Hz, 1H, CH-Fmoc), 3.10 (dd, *J* = 16.1, 3.9 Hz, 1H, CHHβ-Asn), 2.85 (dd, *J* = 16.1, 3.9 Hz, 1H, CHHβ-Asn), 1.72 (s, 3H, CH<sub>3</sub>, cumyl), 1.67 (s, 3H, CH<sub>3</sub>, cumyl); **<sup>13</sup>C NMR** (126 MHz, CDCl<sub>3</sub>) δ<sub>C</sub> 169.7 (C=O), 169.4 (C=O), 156.5 (C=O, Fmoc), 145.5 (C), 144.5 (C), 144.1 (C), 143.9 (C), 141.42 (C), 141.39 (C), 128.8 (CH), 128.4 (CH), 128.2 (CH), 127.8 (CH), 127.3 (CH), 127.2 (CH), 125.4 (CH), 125.3 (CH), 124.4 (CH), 120.1 (CH), 83.7 (C, cumyl), 71.1 (C, Trt), 67.4 (CH<sub>2</sub>, Fmoc), 51.6 (CH, α-Asn), 47.3 (CH, Fmoc), 38.7 (CH<sub>2</sub>, β-Asn), 28.7 (CH<sub>3</sub>, cumyl), 27.9 (CH<sub>3</sub>, cumyl); **v<sub>max</sub>** (neat) = 3311 (NH), 2932, 1721 (C=O), 1491, 1447, 1216, 1137, 1033, 740, 697 cm<sup>-1</sup>; **MS** (ESI<sup>+</sup>) *m/z* 737 [M+Na]<sup>+</sup>, 753 [M+K]<sup>+</sup>; **HRMS** (ESI<sup>+</sup>) calcd. for C<sub>47</sub>H<sub>42</sub>N<sub>2</sub>NaO<sub>5</sub> [M+Na]<sup>+</sup> 737.2986, found 737.2980; [α]<sub>D</sub><sup>27</sup> +3.3 (*c* 0.20, CHCl<sub>3</sub>).

### NO<sub>2</sub>-GOx-Asn(Trt)-OCumyl (**2d**)

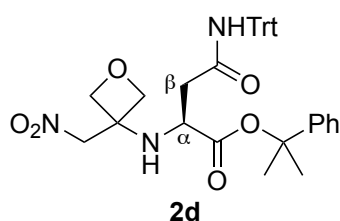

Following general procedure 3, **1d** (8.22 g, 11.5 mmol, 1.0 equiv), oxetan-3-one (1.47 mL, 23.0 mmol, 2.0 equiv) and nitromethane (1.74 mL, 32.2 mmol, 2.8 equiv) were combined to give, after column chromatography (SiO<sub>2</sub>, PE/EtOAc 2:1→1:1), **2d** (3.58 g, 5.89 mmol, 51%) as an orange foam. **R<sub>f</sub>** (PE/EtOAc 1:1) 0.57; **mp** 68–70 °C. **<sup>1</sup>H NMR** (400 MHz, CDCl<sub>3</sub>) δ<sub>H</sub> 7.32–7.25 (m, 14H, ArH), 7.20 (d, *J* = 7.3 Hz, 6H, ArH), 7.16 (s, 1H, NH), 4.69 (d, *J* = 13.8 Hz, 1H, NO<sub>2</sub>CHH), 4.65 (d, *J* = 13.8 Hz, 1H, NO<sub>2</sub>CHH), 4.60 (d, *J* = 7.2 Hz, 1H, OCHH-Ox), 4.46 (d, *J* = 7.3 Hz, 1H, OCHH-Ox), 4.33 (d, *J* = 7.3 Hz, 1H, OCHH-Ox), 4.29 (d, *J* = 7.2 Hz, 1H, OCHH-Ox), 3.94 (br. s, 1H, CH<sub>α</sub>-Asn), 2.80–2.67 (m, 2H, CHH<sub>β</sub>-Asn, NH), 2.49 (dd, *J* = 14.8, 9.3 Hz, 1H, CHH<sub>β</sub>-Asn), 1.74 (s, 6H, 2 × CH<sub>3</sub>, cumyl); **<sup>13</sup>C NMR** (101 MHz, CDCl<sub>3</sub>) δ<sub>C</sub> 173.1 (C=O), 168.6 (C=O), 144.7 (C), 144.5 (C), 128.8 (CH), 128.5 (CH), 128.1 (CH), 127.6 (CH), 127.3 (CH), 124.4 (CH), 83.8 (C, cumyl), 79.3 (NO<sub>2</sub>CH<sub>2</sub>), 78.5 (OCH<sub>2</sub>), 77.7 (OCH<sub>2</sub>), 70.9 (C, Trt), 59.3 (C, Ox), 53.6 (CH, α-Asn), 41.8 (CH<sub>2</sub>, β-Asn), 28.3 (CH<sub>3</sub>, cumyl); **v<sub>max</sub>** (neat) = 3367 (NH), 2980, 1724 (C=O), 1683, 1552, 1491, 1447, 1271, 1134, 1032, 971, 824, 751, 697 cm<sup>-1</sup>; **MS** (ESI<sup>+</sup>) *m/z* 630 [M+Na]<sup>+</sup>, 646 [M+K]<sup>+</sup>; **HRMS** (ESI<sup>+</sup>) calcd. for C<sub>36</sub>H<sub>37</sub>N<sub>3</sub>NaO<sub>6</sub> [M+Na]<sup>+</sup> 630.2575, found 630.2571; [α]<sub>D</sub><sup>26</sup> –8.4 (*c* 0.44, CHCl<sub>3</sub>).

### Fmoc-GOx-Asn(Trt)-OCumyl (**3d**)

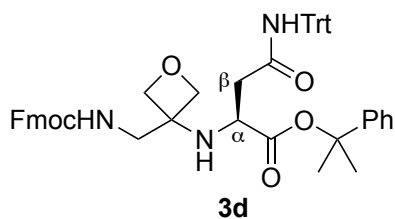

Following general procedure 4, **2d** (1.22 g, 2.00 mmol, 1.0 equiv) gave, after column chromatography (SiO<sub>2</sub>, CH<sub>2</sub>Cl<sub>2</sub>/EtOAc 19:1→9:1→4:1), **3d** (335 mg, 0.42 mmol, 21%) as a white foam. **R<sub>f</sub>** (CH<sub>2</sub>Cl<sub>2</sub>/EtOAc 9:1) 0.22; **mp** 107–110 °C; **<sup>1</sup>H NMR** (400 MHz, CDCl<sub>3</sub>) δ<sub>H</sub> 7.68 (d, *J* = 7.3 Hz, 2H, ArH), 7.46–7.38 (m, 2H, ArH), 7.31 (dd, *J* = 12.2, 6.5 Hz, 2H, ArH), 7.26–7.15 (m, 23H, ArH, NH), 5.54 (t, *J* = 5.7 Hz, 1H, NH), 4.35–4.27 (m, 3H, OCH<sub>2</sub>-Ox, OCHH-Ox), 4.16 (t, *J* = 7.7 Hz, 2H, CH<sub>2</sub>-Fmoc), 3.99–3.86 (m, 2H, OCHH-Ox, CH-Fmoc), 3.85 (d, *J* = 9.9 Hz, 1H, CH<sub>α</sub>-Asn), 3.58 (dd, *J* = 14.4, 6.0 Hz, 1H, CHHGOx), 3.50 (dd, *J* = 14.4, 4.8 Hz, 1H, CHHGOx), 2.70 (d, *J* = 14.2 Hz, 1H, CHH<sub>β</sub>-Asn), 2.34 (dd, *J* = 14.2, 11.1 Hz, 2H, CHH<sub>β</sub>-Asn, NH), 1.70 (s, 3H, CH<sub>3</sub>, cumyl), 1.68 (s, 3H, CH<sub>3</sub>, cumyl); **<sup>13</sup>C NMR** (101 MHz, CDCl<sub>3</sub>) δ<sub>C</sub> 173.6 (C=O), 169.0 (C=O), 157.4 (C=O, Fmoc), 144.6 (C), 144.5 (C), 144.3 (C), 143.9 (C), 141.4 (C), 141.2 (C), 128.9 (CH), 128.5 (CH), 128.1 (CH), 127.72 (CH), 127.66 (CH), 127.6 (CH), 127.2 (CH), 127.1 (CH), 125.7 (CH), 125.2 (CH), 124.4 (CH), 120.0 (CH), 119.9 (CH), 83.4 (C, cumyl), 79.8 (OCH<sub>2</sub>), 79.5 (OCH<sub>2</sub>), 71.0 (C, Trt), 67.2 (CH<sub>2</sub>, Fmoc), 59.8 (C, Ox), 53.4 (CH, α-Asn), 47.1 (CH, Fmoc), 45.4 (CH<sub>2</sub>, GOx), 41.3 (CH<sub>2</sub>, β-Asn), 28.5 (CH<sub>3</sub>, cumyl), 28.2 (CH<sub>3</sub>, cumyl); **v<sub>max</sub>** (neat) = 3316 (NH), 2934, 1722 (C=O), 1672, 1492, 1447, 1244, 1134, 1031, 967, 827, 742, 697 cm<sup>-1</sup>; **MS** (ESI<sup>+</sup>) *m/z* 800 [M+H]<sup>+</sup>, 822 [M+Na]<sup>+</sup>; **HRMS** (ESI<sup>+</sup>) calcd. for C<sub>51</sub>H<sub>49</sub>N<sub>3</sub>NaO<sub>6</sub> [M+Na]<sup>+</sup> 822.3514, found 822.3517; [α]<sub>D</sub><sup>27</sup> +16.9 (*c* 0.20, CHCl<sub>3</sub>).

## 5.5 Synthesis of Fmoc-GOx-Gln(Trt)-OCumyl

### Fmoc-Gln(Trt)-OCumyl (**1e**)

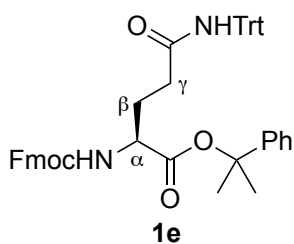

Following general procedure 1, Fmoc-Gln(Trt)-OH (12.2 g, 20.0 mmol, 1.0 equiv) gave, after column chromatography (SiO<sub>2</sub>, PE/EtOAc 4:1→2:1), **1e** (13.2 g, 18.1 mmol, 91%) as a white foam. **R<sub>f</sub>** (PE/EtOAc 2:1) 0.26; **mp** 62–66 °C; **<sup>1</sup>H NMR** (400 MHz, CDCl<sub>3</sub>) δ<sub>H</sub> 7.67 (d, *J* = 7.4 Hz, 2H, ArH), 7.49 (d, *J* = 7.4 Hz, 2H, ArH), 7.33–7.13 (m, 24H, ArH), 6.94 (s, 1H, NH), 5.47 (d, *J* = 7.8 Hz, 1H, NH), 4.40–4.21 (m, 3H, CH<sub>2</sub>-Fmoc, CH<sub>α</sub>-Gln), 4.12 (t, *J* = 6.8 Hz, 1H, CH-Fmoc), 2.38–2.16 (m, 3H, CH<sub>2</sub>γ-Gln, CHHβ-Gln), 1.90–1.79 (m, 1H, CHHβ-Gln), 1.73 (s, 3H, CH<sub>3</sub>, cumyl), 1.68 (s, 3H, CH<sub>3</sub>, cumyl); **<sup>13</sup>C NMR** (101 MHz, CDCl<sub>3</sub>) δ<sub>C</sub> 171.2 (C=O), 170.7 (C=O), 156.6 (C=O, Fmoc), 144.9 (C), 144.7 (C), 144.0 (C), 143.7 (C), 141.42 (C), 141.39 (C), 128.8 (CH), 128.5 (CH), 128.1 (CH), 127.8 (CH), 127.5 (CH), 127.19 (CH), 127.17 (CH), 125.2 (CH), 124.4 (CH), 120.1 (CH), 83.6 (C, cumyl), 70.8 (C, Trt), 67.1 (CH<sub>2</sub>, Fmoc), 54.0 (CH, α-Gln), 47.3 (CH, Fmoc), 33.6 (CH<sub>2</sub>, γ-Gln), 29.0 (CH<sub>2</sub>, β-Gln), 28.9 (CH<sub>3</sub>, cumyl), 28.2 (CH<sub>3</sub>, cumyl); **v<sub>max</sub>** (neat) = 3331 (NH), 2953, 1716 (C=O), 1493, 1447, 1220, 1134, 824, 740, 697 cm<sup>-1</sup>; **MS** (ESI<sup>+</sup>) *m/z* 751 [M+Na]<sup>+</sup>; **HRMS** (ESI<sup>+</sup>) calcd. for C<sub>48</sub>H<sub>44</sub>N<sub>2</sub>NaO<sub>5</sub> [M+Na]<sup>+</sup> 751.3142, found 751.3129; [α]<sub>D</sub><sup>29</sup> +5.5 (*c* 0.20, CHCl<sub>3</sub>).

### NO<sub>2</sub>-GOx-Gln(Trt)-OCumyl (**2e**)

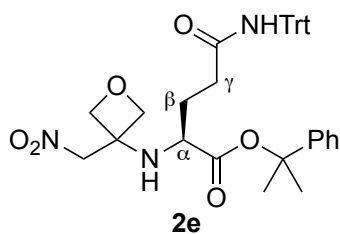

Following general procedure 3, **1e** (12.8 g, 17.5 mmol, 1.0 equiv), oxetan-3-one (2.31 mL, 36.0 mmol, 2.0 equiv) and nitromethane (2.73 mL, 50.4 mmol, 2.8 equiv) were combined to give, after column chromatography (SiO<sub>2</sub>, PE/EtOAc 2:1→1:1) and recrystallisation from EtOAc, **2e** (5.29 g, 8.51 mmol, 49%) as an off-white solid. **R<sub>f</sub>** (PE/EtOAc 1:1) 0.30; **mp** 162–164 °C (decomposition); **<sup>1</sup>H NMR** (400 MHz, CDCl<sub>3</sub>) δ<sub>H</sub> 7.30–7.15 (m, 20H, ArH), 6.59 (s, 1H, NH), 4.63 (d, *J* = 12.0 Hz, 1H, NO<sub>2</sub>CHH), 4.63 (d, *J* = 12.0 Hz, 1H, NO<sub>2</sub>CHH), 4.48 (d, *J* = 7.1 Hz, 1H, OCHH-Ox), 4.43 (d, *J* = 7.0 Hz, 1H, OCHH-Ox), 4.35 (d, *J* = 7.1 Hz, 1H, OCHH-Ox), 4.25 (d, *J* = 7.0 Hz, 1H, OCHH-Ox), 3.43 (br. m, 1H, CH<sub>α</sub>-Gln), 2.42–2.23 (m, 2H, CH<sub>2</sub>γ-Gln), 2.20 (d, *J* = 5.8 Hz, 1H, NH), 2.04 (td, *J* = 13.6, 7.1 Hz, 1H, CHHβ-Gln), 1.73 (s, 6H, 2 × CH<sub>3</sub>, cumyl), 1.67 (dd, *J* = 15.2, 7.6 Hz, 1H, CHHβ-Gln); **<sup>13</sup>C NMR** (101 MHz, CDCl<sub>3</sub>) δ<sub>C</sub> 173.9 (C=O), 171.2 (C=O), 144.8 (C), 128.8 (CH), 128.5 (CH), 128.1 (CH), 127.6 (CH), 127.2 (CH), 124.5 (CH), 83.2 (C, cumyl), 78.9 (OCH<sub>2</sub>), 78.7 (OCH<sub>2</sub>), 78.6 (NO<sub>2</sub>CH<sub>2</sub>), 70.6 (C, Trt), 59.6 (C, Ox), 55.7 (CH, α-Gln), 33.1 (CH<sub>2</sub>, γ-Gln), 29.3 (CH<sub>2</sub>, β-Gln), 28.4 (CH<sub>3</sub>, cumyl), 28.3 (CH<sub>3</sub>, cumyl). *N.B.* One aromatic C not observed; **v<sub>max</sub>** (neat) = 3351 (NH), 2980, 1682 (C=O), 1551, 1489, 1269, 1138, 971, 841, 753, 696 cm<sup>-1</sup>; **MS** (ESI<sup>+</sup>) *m/z* 623 [M+H]<sup>+</sup>, 645 [M+Na]<sup>+</sup>, 661 [M+K]<sup>+</sup>; **HRMS** (ESI<sup>+</sup>) calcd. for C<sub>37</sub>H<sub>39</sub>N<sub>3</sub>NaO<sub>6</sub> [M+Na]<sup>+</sup> 645.2731, found 645.2726; [α]<sub>D</sub><sup>29</sup> +12.5 (*c* 0.20, CHCl<sub>3</sub>).



## NO<sub>2</sub>-GOx-Trp(Boc)-OCumyl (**2f**)

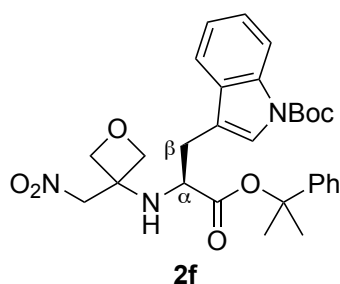

Following general procedure 3, **1f** (3.22 g, 5.00 mmol, 1.0 equiv), oxetan-3-one (640  $\mu$ L, 10.0 mmol, 2.0 equiv) and nitromethane (760  $\mu$ L, 14.0 mmol, 2.8 equiv) were combined to give, after column chromatography (SiO<sub>2</sub>, PE/EtOAc 4:1), **2f** (1.35 g, 2.51 mmol, 50%) as a yellow sticky solid. **R<sub>f</sub>** (PE/EtOAc 4:1) 0.37; **<sup>1</sup>H NMR** (400 MHz, CDCl<sub>3</sub>)  $\delta_{\text{H}}$  8.17 (d,  $J = 7.4$  Hz, 1H, ArH), 7.60 (d,  $J = 7.6$  Hz, 1H, ArH), 7.49–7.26 (m, 4H, ArH), 7.25–7.09 (m, 4H, ArH), 4.77 (d,  $J = 12.8$  Hz, 1H, NO<sub>2</sub>CHH), 4.70 (d,  $J = 12.8$  Hz, 1H, NO<sub>2</sub>CHH), 4.51 (d,  $J = 7.2$  Hz, 1H, OCHH-Ox), 4.39 (d,  $J = 4.6$  Hz, 1H, OCHH-Ox), 4.38 (d,  $J = 4.6$  Hz, 1H, OCHH-Ox), 4.29 (d,  $J = 7.2$  Hz, 1H, OCHH-Ox), 3.84 (br. m, 1H, CH $\alpha$ -Trp), 3.10 (dd,  $J = 14.3, 6.3$  Hz, 1H, CHH $\beta$ -Trp), 2.97 (dd,  $J = 14.3, 6.9$  Hz, 1H, CHH $\beta$ -Trp), 2.97 (br. s, 1H, NH), 1.75 (s, 3H, CH<sub>3</sub>, cumyl), 1.69 (s, 3H, CH<sub>3</sub>, cumyl), 1.65 (s, 9H, 3  $\times$  CH<sub>3</sub>, *t*Bu); **<sup>13</sup>C NMR** (101 MHz, CDCl<sub>3</sub>)  $\delta_{\text{C}}$  173.5 (C=O), 149.7 (C=O, Boc), 144.8 (C), 135.6 (C), 130.4 (C), 128.4 (CH), 127.5 (CH), 124.7 (CH), 124.6 (CH), 124.4 (CH), 122.8 (CH), 119.1 (CH), 115.6 (C), 115.4 (CH), 83.7 (C, cumyl), 83.5 (C, *t*Bu), 78.9 (NO<sub>2</sub>CH<sub>2</sub> or OCH<sub>2</sub>), 78.8 (NO<sub>2</sub>CH<sub>2</sub> or OCH<sub>2</sub>), 78.7 (OCH<sub>2</sub>), 59.6 (C, Ox), 56.6 (CH,  $\alpha$ -Trp), 30.4 (CH<sub>2</sub>,  $\beta$ -Trp), 28.7 (CH<sub>3</sub>, cumyl), 28.3 (CH<sub>3</sub>, *t*Bu), 27.5 (CH<sub>3</sub>, cumyl); **v<sub>max</sub>** (neat) = 2979, 1721 (C=O), 1451, 1368, 1220, 1152, 1085, 1055, 758, 739 cm<sup>-1</sup>; **MS** (ESI<sup>+</sup>)  $m/z$  560 [M+Na]<sup>+</sup>; **HRMS** (ESI<sup>+</sup>) calcd. for C<sub>29</sub>H<sub>35</sub>N<sub>3</sub>NaO<sub>7</sub> [M+Na]<sup>+</sup> 560.2367, found 560.2372; [ $\alpha$ ]<sub>D</sub><sup>29</sup> +6.2 (*c* 1.09, CHCl<sub>3</sub>).

## Fmoc-GOx-Trp(Boc)-OCumyl (**3f**)

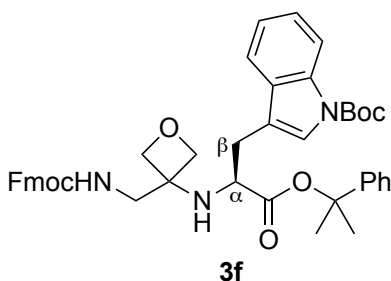

Following general procedure 4, **2f** (2.28 g, 4.23 mmol, 1.0 equiv) gave, after column chromatography (SiO<sub>2</sub>, CH<sub>2</sub>Cl<sub>2</sub>/EtOAc 19:1→9:1→4:1), **3f** (1.35 g, 1.85 mmol, 44%) as a white foam. **R<sub>f</sub>** (CH<sub>2</sub>Cl<sub>2</sub>/EtOAc 4:1) 0.44; **mp** 85–90 °C; **<sup>1</sup>H NMR** (400 MHz, CDCl<sub>3</sub>)  $\delta_{\text{H}}$  8.16 (d,  $J = 7.0$  Hz, 1H, ArH), 7.76 (d,  $J = 7.5$  Hz, 2H, ArH), 7.60 (d,  $J = 7.6$  Hz, 1H, ArH), 7.54 (t,  $J = 6.7$  Hz, 2H, ArH), 7.49 (s, 1H, ArH), 7.44–7.26 (m, 8H, ArH), 7.24 (d,  $J = 7.2$  Hz, 3H, ArH), 5.07 (br. s, 1H, NH), 4.50–4.18 (m, 6H, 2  $\times$  OCH<sub>2</sub>-Ox, CH<sub>2</sub>-Fmoc), 4.16 (s, 1H, CH-Fmoc), 3.70 (t,  $J = 6.4$  Hz, 1H, CH $\alpha$ -Trp), 3.63 (dd,  $J = 13.8, 6.3$  Hz, 1H, CHHGOx), 3.30 (dd,  $J = 13.8, 4.7$  Hz, 1H, CHHGOx), 3.16 (dd,  $J = 14.3, 5.3$  Hz, 1H, CHH $\beta$ -Trp), 2.94 (dd,  $J = 14.3, 8.1$  Hz, 1H, CHH $\beta$ -Trp), 1.78 (s, 3H, CH<sub>3</sub>, cumyl), 1.73 (s, 3H, CH<sub>3</sub>, cumyl), 1.64 (s, 9H, 3  $\times$  CH<sub>3</sub>, *t*Bu); **<sup>13</sup>C NMR** (101 MHz, CDCl<sub>3</sub>)  $\delta_{\text{C}}$  174.2 (C=O), 156.9 (C=O, Fmoc), 149.7 (C=O, Boc), 144.8 (C), 144.1 (C), 141.4 (C), 135.7 (C), 130.4 (C), 128.4 (CH), 127.8 (CH), 127.6 (CH), 127.2 (CH), 125.3 (CH), 124.9 (CH), 124.4 (CH), 122.9 (CH), 120.1 (CH), 119.1 (CH), 116.0 (C), 115.7 (CH), 83.9 (C, cumyl), 83.4 (C, *t*Bu), 79.8 (OCH<sub>2</sub>), 79.7 (OCH<sub>2</sub>), 67.0 (CH<sub>2</sub>, Fmoc), 59.6 (C, Ox), 59.5 (CH,  $\alpha$ -Trp), 47.3 (CH, Fmoc), 45.4 (CH<sub>2</sub>, GOx), 30.5 (CH<sub>2</sub>,  $\beta$ -Trp), 28.7 (CH<sub>3</sub>, cumyl), 28.3 (CH<sub>3</sub>, *t*Bu), 27.6 (CH<sub>3</sub>, cumyl). *N.B.* Two aromatic C and one aromatic CH signal not observed; **v<sub>max</sub>** (neat) = 2979, 2933, 1722 (C=O), 1450, 1368, 1254, 1152, 1055, 758, 739, 698 cm<sup>-1</sup>; **MS** (ESI<sup>+</sup>)  $m/z$  730 [M+H]<sup>+</sup>, 752 [M+Na]<sup>+</sup>; **HRMS** (ESI<sup>+</sup>) calcd. for C<sub>44</sub>H<sub>47</sub>N<sub>3</sub>NaO<sub>7</sub> [M+Na]<sup>+</sup> 752.3306, found 752.3300; [ $\alpha$ ]<sub>D</sub><sup>29</sup> -1.8 (*c* 1.00, CHCl<sub>3</sub>).

## 5.7 Synthesis of Fmoc-GOx-Tyr(*t*Bu)-OCumyl

### Fmoc-Tyr(*t*Bu)-OCumyl (**1g**)

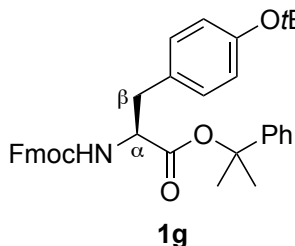

Following general procedure 1, Fmoc-Tyr(*t*Bu)-OH (4.59 g, 10.0 mmol, 1.0 equiv) gave, after column chromatography (SiO<sub>2</sub>, PE/EtOAc 9:1→4:1), **1g** (5.49 g, 9.50 mmol, 95%) as a colourless gum. **R<sub>f</sub>** (PE/EtOAc 4:1) 0.36; **<sup>1</sup>H NMR** (400 MHz, CDCl<sub>3</sub>) δ<sub>H</sub> 7.76 (d, *J* = 7.4 Hz, 2H, ArH), 7.56 (d, *J* = 7.4 Hz, 2H, ArH), 7.40 (t, *J* = 7.4 Hz, 2H, ArH), 7.34–7.25 (m, 7H, ArH), 7.08 (d, *J* = 7.8 Hz, 2H, ArH), 6.92 (d, *J* = 7.4 Hz, 2H, ArH), 5.27 (d, *J* = 7.8 Hz, 1H, NH), 4.63 (dd, *J* = 13.1, 6.3 Hz, 1H, CH $\alpha$ -Tyr), 4.40 (t, *J* = 7.9 Hz, 1H, CHH-Fmoc), 4.32 (dd, *J* = 9.8, 7.5 Hz, 1H, CHH-Fmoc), 4.20 (t, *J* = 6.9 Hz, 1H, CH-Fmoc), 3.12 (dd, *J* = 14.6, 6.8 Hz, 1H, CHH $\beta$ -Tyr), 3.06 (dd, *J* = 14.6, 7.2 Hz, 1H, CHH $\beta$ -Tyr), 1.75 (s, 3H, CH<sub>3</sub>, cumyl), 1.72 (s, 3H, CH<sub>3</sub>, cumyl), 1.32 (s, 9H, 3 × CH<sub>3</sub>, *t*Bu); **<sup>13</sup>C NMR** (101 MHz, CDCl<sub>3</sub>) δ<sub>C</sub> 170.4 (C=O), 155.7 (C=O, Fmoc), 154.5 (C), 145.0 (C), 143.9 (C), 141.4 (C), 130.9 (C), 130.1 (CH), 128.5 (CH), 127.8 (CH), 127.4 (CH), 127.2 (CH), 125.3 (CH), 125.2 (CH), 124.5 (CH), 124.3 (CH), 120.1 (CH), 83.6 (C, cumyl), 78.5 (C, *t*Bu), 67.1 (CH<sub>2</sub>, Fmoc), 55.3 (CH,  $\alpha$ -Tyr), 47.3 (CH, Fmoc), 37.9 (CH<sub>2</sub>,  $\beta$ -Tyr), 29.0 (CH<sub>3</sub>, *t*Bu), 28.9 (CH<sub>3</sub>, cumyl), 28.0 (CH<sub>3</sub>, cumyl); **v<sub>max</sub>** (neat) = 3328 (NH), 2977, 1717 (C=O), 1505, 1448, 1365, 1236, 1159, 1136, 1102, 1031, 896, 826, 739 cm<sup>-1</sup>; **MS** (ESI<sup>+</sup>) *m/z* 600 [M+Na]<sup>+</sup>, 616 [M+K]<sup>+</sup>; **HRMS** (ESI<sup>+</sup>) calcd. for C<sub>37</sub>H<sub>39</sub>NNaO<sub>5</sub> [M+Na]<sup>+</sup> 600.2720, found 600.2725; [ $\alpha$ ]<sub>D</sub><sup>28</sup> +16.0 (*c* 0.80, CHCl<sub>3</sub>).

### NO<sub>2</sub>-GOx-Tyr(*t*Bu)-OCumyl (**2g**)

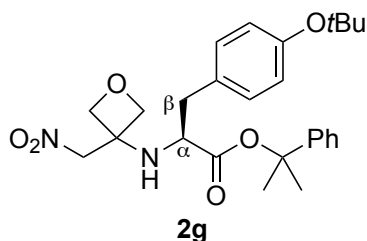

Following general procedure 3, **1g** (5.78 g, 10.0 mmol, 1.0 equiv), oxetan-3-one (1.28 mL, 20.0 mmol, 2.0 equiv) and nitromethane (1.52 mL, 28.0 mmol, 2.8 equiv) were combined to give, after column chromatography (SiO<sub>2</sub>, PE/EtOAc 4:1→2:1), **2g** (2.91 g, 6.18 mmol, 62%) as an orange oil. **R<sub>f</sub>** (PE/EtOAc 2:1) 0.46; **<sup>1</sup>H NMR** (400 MHz, CDCl<sub>3</sub>) δ<sub>H</sub> 7.38–7.22 (m, 5H, ArH), 7.10 (d, *J* = 7.9 Hz, 2H, ArH), 6.93 (d, *J* = 7.9 Hz, 2H, ArH), 4.72 (d, *J* = 12.7 Hz, 1H, NO<sub>2</sub>CHH), 4.65 (d, *J* = 12.7 Hz, 1H, NO<sub>2</sub>CHH), 4.44 (d, *J* = 7.1 Hz, 1H, OCHH-Ox), 4.32 (d, *J* = 7.1 Hz, 1H, OCHH-Ox), 4.28–4.23 (m, 2H, OCH<sub>2</sub>-Ox), 3.67 (q, *J* = 7.9 Hz, 1H, CH $\alpha$ -Tyr), 2.96 (dd, *J* = 13.4, 5.7 Hz, 1H, CHH $\beta$ -Tyr), 2.77 (dd, *J* = 13.4, 7.9 Hz, 1H, CHH $\beta$ -Tyr), 2.32 (d, *J* = 7.9 Hz, 1H, NH), 1.76 (s, 3H, CH<sub>3</sub>, cumyl), 1.70 (s, 3H, CH<sub>3</sub>, cumyl), 1.32 (s, 9H, 3 × CH<sub>3</sub>, *t*Bu); **<sup>13</sup>C NMR** (101 MHz, CDCl<sub>3</sub>) δ<sub>C</sub> 173.5 (C=O), 154.4 (C), 144.9 (C), 132.0 (C), 130.2 (CH), 128.5 (CH), 127.6 (CH), 124.5 (CH), 124.3 (CH), 83.3 (C, cumyl), 79.0 (NO<sub>2</sub>CH<sub>2</sub>), 78.8 (OCH<sub>2</sub>), 78.7 (OCH<sub>2</sub>), 78.6 (C, *t*Bu), 59.5 (C, Ox), 58.1 (C,  $\alpha$ -Tyr), 40.3 (CH<sub>2</sub>,  $\beta$ -Tyr), 29.0 (CH<sub>3</sub>, *t*Bu), 28.8 (CH<sub>3</sub>, cumyl), 27.6 (CH<sub>3</sub>, cumyl); **v<sub>max</sub>** (neat) = 3336 (NH), 2976, 1727 (C=O), 1555, 1505, 1366, 1236, 1160, 1135, 981 cm<sup>-1</sup>; **MS** (ESI<sup>+</sup>) *m/z* 493 [M+Na]<sup>+</sup>, 509 [M+K]<sup>+</sup>; **HRMS** (ESI<sup>+</sup>) calcd. for C<sub>26</sub>H<sub>34</sub>N<sub>2</sub>NaO<sub>6</sub> [M+Na]<sup>+</sup> 493.2309, found 493.2310; [ $\alpha$ ]<sub>D</sub><sup>28</sup> +5.3 (*c* 1.47, CHCl<sub>3</sub>).

### Fmoc-GOx-Tyr(*t*Bu)-OCumyl (**3g**)

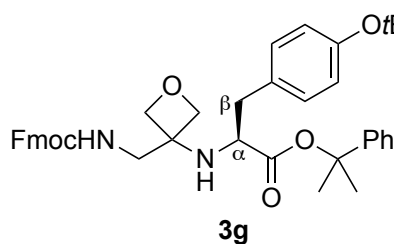

Following general procedure 4, **2g** (2.76 g, 5.87 mmol, 1.0 equiv) gave, after column chromatography (SiO<sub>2</sub>, CH<sub>2</sub>Cl<sub>2</sub>/EtOAc 9:1→4:1), **3g** (2.26 g, 3.41 mmol, 58%) as a white foam. **R<sub>f</sub>** (CH<sub>2</sub>Cl<sub>2</sub>/EtOAc 9:1) 0.37; **mp** 60–62 °C; **<sup>1</sup>H NMR** (400 MHz, CDCl<sub>3</sub>) δ<sub>H</sub> 7.77 (d, *J* = 7.5 Hz, 2H, ArH), 7.58 (t, *J* = 7.2 Hz, 2H, ArH), 7.40 (t, *J* = 7.4 Hz, 2H, ArH), 7.35–7.29 (m, 6H, ArH), 7.26–7.21 (m, 1H, ArH), 7.14 (d, *J* = 7.6 Hz, 2H, ArH), 6.94 (d, *J* = 7.6 Hz, 2H, ArH), 4.95 (t, *J* = 5.5 Hz, 1H, NH), 4.38 (dd, *J* = 9.8, 8.1 Hz, 1H, CHH-Fmoc), 4.31 (t, *J* = 8.5 Hz, 1H, CHH-Fmoc), 4.25–4.18 (m, 2H, CH-Fmoc, OCHH-Ox), 4.17–4.09 (m, 3H, OCH<sub>2</sub>-Ox, OCHH-Ox), 3.58–3.40 (m, 2H, CH<sub>α</sub>-Tyr, CHHGox), 3.33 (dd, *J* = 13.7, 4.6 Hz, 1H, CHHGox), 3.03 (dd, *J* = 12.9, 3.6 Hz, 1H, CHHβ-Tyr), 2.69 (dd, *J* = 12.9, 9.3 Hz, 1H, CHHβ-Tyr), 2.03 (br. s, 1H, NH), 1.77 (s, 3H, CH<sub>3</sub>, cumyl), 1.73 (s, 3H, CH<sub>3</sub>, cumyl), 1.29 (s, 9H, 3 × CH<sub>3</sub>, *t*Bu); **<sup>13</sup>C NMR** (101 MHz, CDCl<sub>3</sub>) δ<sub>C</sub> 174.2 (C=O), 156.9 (C=O, Fmoc), 154.5 (C), 144.9 (C), 144.2 (C), 144.1 (C), 141.4 (C), 132.3 (C), 130.0 (CH), 128.5 (CH), 127.8 (CH), 127.5 (CH), 127.2 (CH), 125.3 (CH), 124.5 (CH), 120.1 (CH), 83.2 (C, cumyl), 79.8 (OCH<sub>2</sub>), 79.5 (OCH<sub>2</sub>), 78.5 (C, *t*Bu), 66.9 (CH<sub>2</sub>, Fmoc), 59.5 (C, Ox), 58.1 (CH, α-Tyr), 47.3 (CH, Fmoc), 45.3 (CH<sub>2</sub>, GOx), 40.3 (CH<sub>2</sub>, β-Tyr), 28.9 (CH<sub>3</sub>, *t*Bu), 28.7 (CH<sub>3</sub>, cumyl), 27.8 (CH<sub>3</sub>, cumyl). *N.B.* One aromatic C and one aromatic CH signal not observed; **v<sub>max</sub>** (neat) = 3329 (NH), 2976, 1720 (C=O), 1505, 1448, 1365, 1235, 1159, 1133, 1100, 974, 895, 831, 740 cm<sup>-1</sup>; **MS** (ESI<sup>+</sup>) *m/z* 663 [M+H]<sup>+</sup>, 685 [M+Na]<sup>+</sup>; **HRMS** (ESI<sup>+</sup>) calcd. for C<sub>41</sub>H<sub>46</sub>N<sub>2</sub>NaO<sub>6</sub> [M+Na]<sup>+</sup> 685.3248, found 685.3254; [α]<sub>D</sub><sup>28</sup> -0.1 (*c* 0.40, CHCl<sub>3</sub>).

### 5.8 Synthesis of Fmoc-GOx-Cys(Trt)-OCumyl

#### Fmoc-Cys(Trt)-OCumyl (**1h**)

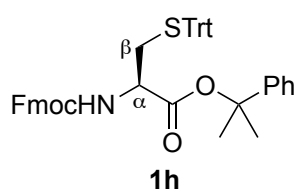

Following general procedure 1, Fmoc-Cys(Trt)-OH (4.15 g, 7.10 mmol, 1.0 equiv) gave, after column chromatography (SiO<sub>2</sub>, PE/EtOAc 9:1→4:1), **1h** (3.88 g, 5.51 mmol, 78%) as a white foam. **R<sub>f</sub>** (PE/EtOAc 4:1) 0.22; **mp** 60–62 °C; **<sup>1</sup>H NMR** (400 MHz, CDCl<sub>3</sub>) δ<sub>H</sub> 7.81 (d, *J* = 7.4 Hz, 2H, ArH), 7.64 (d, *J* = 7.4 Hz, 2H, ArH), 7.51–7.39 (m, 8H, ArH), 7.36–7.26 (m, 16H, ArH), 5.33 (d, *J* = 8.1 Hz, 1H, NH), 4.47–4.37 (m, 3H, CH<sub>2</sub>-Fmoc, CH<sub>α</sub>-Cys), 4.27 (t, *J* = 6.8 Hz, 1H, CH-Fmoc), 2.73 (dd, *J* = 11.4, 6.6 Hz, 1H, CHHβ-Cys), 2.65 (dd, *J* = 11.4, 2.8 Hz, 1H, CHHβ-Cys), 1.81 (s, 6H, 2 × CH<sub>3</sub>, cumyl); **<sup>13</sup>C NMR** (101 MHz, CDCl<sub>3</sub>) δ<sub>C</sub> 169.2 (C=O), 155.7 (C=O, Fmoc), 145.0 (C), 144.5 (C), 144.0 (C), 143.9 (C), 141.4 (C), 129.6 (CH), 128.4 (CH), 128.2 (CH), 127.8 (CH), 127.4 (CH), 127.2 (CH), 127.0 (CH), 125.3 (CH), 124.5 (CH), 120.1 (CH), 83.9 (C, cumyl), 67.3 (CH<sub>2</sub>, Fmoc), 67.0 (C, Trt), 53.5 (CH, α-Cys), 47.2 (CH, Fmoc), 34.5 (CH<sub>2</sub>, β-Cys), 28.43 (CH<sub>3</sub>, cumyl), 28.41 (CH<sub>3</sub>, cumyl). *N.B.* One aromatic C not observed; **v<sub>max</sub>** (neat) = 3317 (NH), 2979, 1719 (C=O), 1493, 1446, 1201, 1134, 1031, 831, 734 cm<sup>-1</sup>; **MS** (ESI<sup>+</sup>) *m/z* 726 [M+Na]<sup>+</sup>; **HRMS** (ESI<sup>+</sup>) calcd. for C<sub>46</sub>H<sub>41</sub>NNaO<sub>4</sub>S [M+Na]<sup>+</sup> 726.2649, found 726.2642; [α]<sub>D</sub><sup>29</sup> +20.1 (*c* 0.40, CHCl<sub>3</sub>).

### NO<sub>2</sub>-GOx-Cys(Trt)-OCumyl (**2h**)

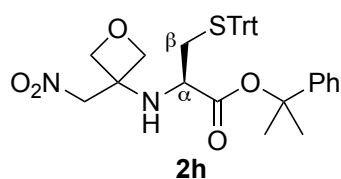

Following general procedure 3, **1h** (3.85 g, 5.47 mmol, 1.0 equiv), oxetan-3-one (699  $\mu$ L, 10.9 mmol, 2.0 equiv) and nitromethane (829  $\mu$ L, 15.3 mmol, 2.8 equiv) were combined to give, after column chromatography (SiO<sub>2</sub>, PE/EtOAc 4:1 $\rightarrow$ 2:1), **2h** (1.48 g, 2.45 mmol, 45%) as an orange gum. **R<sub>f</sub>** (PE/EtOAc 2:1) 0.36; **<sup>1</sup>H NMR** (400 MHz, CDCl<sub>3</sub>)  $\delta_{\text{H}}$  7.45 (d,  $J = 7.5$  Hz, 6H, ArH), 7.35–7.25 (m, 14H), 4.70 (d,  $J = 13.4$  Hz, 1H, NO<sub>2</sub>CHH), 4.66 (d,  $J = 13.4$  Hz, 1H, NO<sub>2</sub>CHH), 4.55 (d,  $J = 7.0$  Hz, 1H, OCHH-Ox), 4.46–4.36 (m, 3H, OCHH-Ox, OCH<sub>2</sub>-Ox), 3.23 (br. s, 1H, CH $\alpha$ -Cys), 2.50 (dd,  $J = 12.7, 5.4$  Hz, 1H, CHH $\beta$ -Cys), 2.44 (dd,  $J = 12.7, 7.8$  Hz, 1H, CHH $\beta$ -Cys), 2.40 (br. s, 1H, NH), 1.75 (s, 3H, CH<sub>3</sub>, cumyl), 1.73 (s, 3H, CH<sub>3</sub>, cumyl); **<sup>13</sup>C NMR** (101 MHz, CDCl<sub>3</sub>)  $\delta_{\text{C}}$  172.1 (C=O), 144.69 (C), 144.67 (C), 129.7 (CH), 128.4 (CH), 128.2 (CH), 127.6 (CH), 126.9 (CH), 124.5 (CH), 83.6 (C, cumyl), 78.91 (NO<sub>2</sub>CH<sub>2</sub> or OCH<sub>2</sub>), 78.87 (NO<sub>2</sub>CH<sub>2</sub> or OCH<sub>2</sub>), 78.4 (OCH<sub>2</sub>), 67.2 (C, Trt), 59.2 (C, Ox), 56.4 (CH,  $\alpha$ -Cys), 36.3 (CH<sub>2</sub>,  $\beta$ -Cys), 28.4 (CH<sub>3</sub>, cumyl), 28.1 (CH<sub>3</sub>, cumyl);  **$\nu_{\text{max}}$**  (neat) = 3367 (NH), 2979, 1721 (C=O), 1492, 1446, 1200, 1334, 1031, 831, 740  $\text{cm}^{-1}$ ; **MS** (ESI<sup>+</sup>)  $m/z$  619 [M+Na]<sup>+</sup>, 635 [M+K]<sup>+</sup>; **HRMS** (ESI<sup>+</sup>) calcd. for C<sub>35</sub>H<sub>36</sub>N<sub>2</sub>NaO<sub>5</sub>S [M+Na]<sup>+</sup> 619.2237, found 619.2243; [ $\alpha$ ]<sub>D</sub><sup>28</sup> +20.0 ( $c$  0.14, CHCl<sub>3</sub>).

### Fmoc-GOx-Cys(Trt)-OCumyl (**3h**)

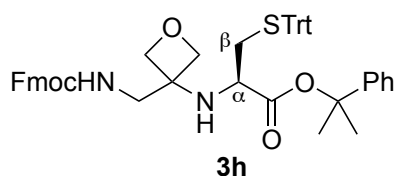

Following general procedure 5, **2h** (878 mg, 1.47 mmol, 1.0 equiv) gave, after column chromatography (SiO<sub>2</sub>, CH<sub>2</sub>Cl<sub>2</sub>/EtOAc 19:1 $\rightarrow$ 9:1), **3h** (427 mg, 0.54 mmol, 37%) as a white foam. **R<sub>f</sub>** (CH<sub>2</sub>Cl<sub>2</sub>/EtOAc 9:1) 0.48; **mp** 69–71 °C; **<sup>1</sup>H NMR** (400 MHz, CDCl<sub>3</sub>)  $\delta_{\text{H}}$  7.79 (d,  $J = 7.4$  Hz, 2H, ArH), 7.65–7.55 (m, 2H, ArH), 7.48 (d,  $J = 7.4$  Hz, 6H, ArH), 7.42 (t,  $J = 7.4$  Hz, 2H, ArH), 7.34–7.21 (m, 16H, ArH), 5.54 (t,  $J = 5.3$  Hz, 1H, NH), 4.48–4.24 (m, 5H, CH<sub>2</sub>-Fmoc, OCH<sub>2</sub>-Ox, OCHH-Ox), 4.19 (d,  $J = 6.0$  Hz, 1H, OCHH-Ox), 4.13 (t,  $J = 7.3$  Hz, 1H, CH-Fmoc), 3.57 (dd,  $J = 13.6, 5.7$  Hz, 1H, CHHGOx), 3.47 (dd,  $J = 13.6, 2.7$  Hz, 1H, CHHGOx), 2.97 (br. s, 1H, CH $\alpha$ -Cys), 2.60–2.40 (m, 2H, CH<sub>2</sub> $\beta$ -Cys), 2.04 (br. s, 1H, NH), 1.77 (s, 3H, CH<sub>3</sub>, cumyl), 1.72 (s, 3H, CH<sub>3</sub>, cumyl); **<sup>13</sup>C NMR** (101 MHz, CDCl<sub>3</sub>)  $\delta_{\text{C}}$  172.8 (C=O), 157.0 (C=O, Fmoc), 144.6 (C), 144.2 (C), 144.0 (C), 141.4 (C), 141.3 (C), 129.7 (CH), 128.4 (CH), 128.2 (CH), 127.8 (CH), 127.6 (CH), 127.2 (CH), 127.0 (CH), 125.4 (CH), 125.3 (CH), 124.4 (CH), 120.0 (CH), 83.4 (C, cumyl), 80.2 (OCH<sub>2</sub>), 79.6 (OCH<sub>2</sub>), 67.5 (C, Trt), 67.1 (CH<sub>2</sub>, Fmoc), 59.2 (C, Ox), 56.0 (CH,  $\alpha$ -Cys), 47.3 (CH, Fmoc), 44.7 (CH<sub>2</sub>, GOx), 36.5 (CH<sub>2</sub>,  $\beta$ -Cys), 28.6 (CH<sub>3</sub>, cumyl), 28.0 (CH<sub>3</sub>, cumyl). *N.B.* One aromatic C not observed;  **$\nu_{\text{max}}$**  (neat) = 3338 (NH), 2978, 1722 (C=O), 1492, 1446, 1201, 1134, 1031, 831, 740  $\text{cm}^{-1}$ ; **MS** (ESI<sup>+</sup>)  $m/z$  789 [M+H]<sup>+</sup>, 811 [M+Na]<sup>+</sup>, 827 [M+K]<sup>+</sup>; **HRMS** (ESI<sup>+</sup>) calcd. for C<sub>50</sub>H<sub>48</sub>N<sub>2</sub>NaO<sub>5</sub>S [M+Na]<sup>+</sup> 811.3176, found 811.3176; [ $\alpha$ ]<sub>D</sub><sup>29</sup> +41.3 ( $c$  0.20, CHCl<sub>3</sub>).



## 5.9 Synthesis of Fmoc-GOx-Met-OCumyl

### Fmoc-Met-OCumyl (**1i**)

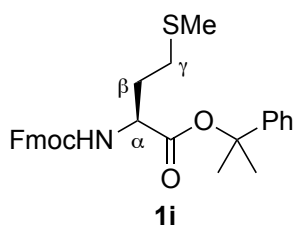

Following general procedure 1, Fmoc-Met-OH (3.71 g, 10.0 mmol, 1.0 equiv) gave, after column chromatography (SiO<sub>2</sub>, PE/EtOAc 4:1), **1i** (4.65 g, 9.50 mmol, 95%) contaminated with traces of 2-phenyl-2-propanol (~ 3:1 by <sup>1</sup>H NMR) as a colourless oil. **R<sub>f</sub>** (PE/EtOAc 4:1) 0.60; **<sup>1</sup>H NMR** (400 MHz, CDCl<sub>3</sub>) δ<sub>H</sub> 7.77 (d, *J* = 7.4 Hz, 2H, ArH), 7.59 (d, *J* = 7.4 Hz, 2H, ArH), 7.43–7.28 (m, 9H, ArH), 5.40 (br. s, 1H, NH), 4.50 (s, 1H, CH<sub>α</sub>-Met), 4.44–4.36 (m, 2H, CH<sub>2</sub>-Fmoc), 4.22 (t, *J* = 6.7 Hz, 1H, CH-Fmoc), 2.66–2.39 (m, 2H, CH<sub>2</sub>γ-Met), 2.34–2.17 (m, 1H, CHHβ-Met), 2.12 (s, 3H, CH<sub>3</sub>, Met), 2.00 (dd, *J* = 13.4, 7.4 Hz, 1H, CHHβ-Met), 1.82 (s, 3H, CH<sub>3</sub>, cumyl), 1.75 (s, 3H, CH<sub>3</sub>, cumyl); **<sup>13</sup>C NMR** (101 MHz, CDCl<sub>3</sub>) δ<sub>C</sub> 170.6 (C=O), 156.0 (C=O, Fmoc), 144.9 (C), 144.0 (C), 143.9 (C), 141.4 (C), 128.5 (CH), 127.8 (CH), 127.6 (CH), 127.2 (CH), 125.2 (CH), 124.4 (CH), 120.1 (CH), 83.6 (C, cumyl), 67.1 (CH<sub>2</sub>, Fmoc), 53.7 (CH, α-Met), 47.3 (CH, Fmoc), 32.4 (CH<sub>2</sub>, β-Met), 30.0 (CH<sub>2</sub>, γ-Met), 28.7 (CH<sub>3</sub>, cumyl), 28.4 (CH<sub>3</sub>, cumyl), 15.7 (CH<sub>3</sub>, Met). *N.B.* One aromatic C not observed; **v<sub>max</sub>** (neat) = 3329 (NH), 3062, 2977, 2917, 1705 (C=O), 1447, 1218, 1135, 759, 740 cm<sup>-1</sup>; **MS** (ESI<sup>+</sup>) *m/z* 512 [M+Na]<sup>+</sup>; **HRMS** (ESI<sup>+</sup>) calcd. for C<sub>29</sub>H<sub>31</sub>NNaO<sub>4</sub>S [M+Na]<sup>+</sup> 512.1866, found 512.1869; [α]<sub>D</sub><sup>29</sup> -0.9 (*c* 1.10, CHCl<sub>3</sub>).

### NO<sub>2</sub>-GOx-Met-OCumyl (**2i**)

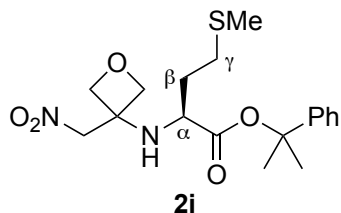

Following general procedure 3, **1i** (4.50 g, 9.19 mmol, 1.0 equiv), oxetan-3-one (1.18 mL, 18.4 mmol, 2.0 equiv) and nitromethane (1.40 mL, 25.7 mmol, 2.8 equiv) were combined to give, after column chromatography (SiO<sub>2</sub>, PE/EtOAc 4:1), **2i** (1.96 g, 5.12 mmol, 56%) contaminated with traces of 2-phenyl-2-propanol (~ 3:1 by <sup>1</sup>H NMR) as a sticky yellow gum. **R<sub>f</sub>** (PE/EtOAc 4:1) 0.49; **<sup>1</sup>H NMR** (400 MHz, CDCl<sub>3</sub>) δ<sub>H</sub> 7.38–7.27 (m, 5H, ArH), 4.80 (d, *J* = 12.8 Hz, 1H, NO<sub>2</sub>CHH), 4.70 (d, *J* = 12.8 Hz, 1H, NO<sub>2</sub>CHH), 4.63 (d, *J* = 7.2 Hz, 1H, OCHH-Ox), 4.51 (d, *J* = 7.2 Hz, 1H, OCHH-Ox), 4.45 (d, *J* = 7.2 Hz, 2H, 2 × OCH<sub>2</sub>-Ox), 3.67 (d, *J* = 4.6 Hz, 1H, CH<sub>α</sub>-Met), 2.62–2.56 (m, 2H, CH<sub>2</sub>γ-Met), 2.30 (br. s, 1H, NH), 2.11 (s, 3H, CH<sub>3</sub>, Met), 2.11–1.96 (m, 1H, CHHβ-Met), 1.80 (s, 6H, 2 × CH<sub>3</sub>, cumyl), 1.75–1.69 (m, 1H, CHHβ-Met); **<sup>13</sup>C NMR** (101 MHz, CDCl<sub>3</sub>) δ<sub>C</sub> 174.3 (C=O), 144.8 (C), 128.6 (CH), 127.7 (CH), 124.5 (CH), 83.3 (C, cumyl), 79.2 (NO<sub>2</sub>CH<sub>2</sub> or OCH<sub>2</sub>), 78.7 (NO<sub>2</sub>CH<sub>2</sub> or OCH<sub>2</sub>), 78.5 (OCH<sub>2</sub>), 59.6 (C, Ox), 54.8 (CH, α-Met), 33.3 (CH<sub>2</sub>, β-Met), 30.4 (CH<sub>2</sub>, γ-Met), 28.5 (CH<sub>3</sub>, cumyl), 28.2 (CH<sub>3</sub>, cumyl), 15.3 (CH<sub>3</sub>, Met); **v<sub>max</sub>** (neat) = 3366 (NH), 2979, 2919, 2880, 1726 (C=O), 1553, 1380, 1272, 1199, 1133, 1101, 824 cm<sup>-1</sup>; **MS** (ESI<sup>+</sup>) *m/z* 405 [M+Na]<sup>+</sup>; **HRMS** (ESI<sup>+</sup>) calcd. for C<sub>18</sub>H<sub>26</sub>N<sub>2</sub>NaO<sub>5</sub>S [M+Na]<sup>+</sup> 405.1455, found 405.1460; [α]<sub>D</sub><sup>29</sup> -18.9 (*c* 1.04, CHCl<sub>3</sub>).

### Fmoc-GOx-Met-OCumyl (**3i**)

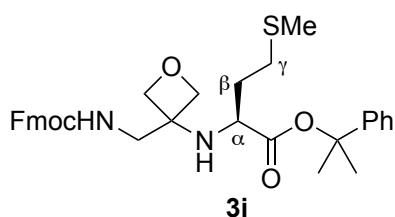

Following general procedure 4, **2i** (710 mg, 1.86 mmol, 1.0 equiv) gave, after column chromatography (SiO<sub>2</sub>, CH<sub>2</sub>Cl<sub>2</sub>/EtOAc 9:1), **3i** (280 mg, 0.49 mmol, 26%) as a sticky colourless gum. Alternatively following general procedure 5, **2i** (312 mg, 0.82 mmol, 1.0 equiv) gave, after column chromatography (SiO<sub>2</sub>, CH<sub>2</sub>Cl<sub>2</sub>/EtOAc 9:1), **3i** (173 mg, 0.30 mmol, 37%) as a sticky colourless gum. **R<sub>f</sub>** (CH<sub>2</sub>Cl<sub>2</sub>/EtOAc 9:1) 0.54; **<sup>1</sup>H NMR** (400 MHz, CDCl<sub>3</sub>) δ<sub>H</sub> 7.76 (d, *J* = 7.4 Hz, 2H, ArH), 7.58 (d, *J* = 7.4 Hz, 2H, ArH), 7.44–7.27 (m, 9H, ArH), 5.36 (br. s, 1H, NH), 4.43 (d, *J* = 7.0 Hz, 1H, OCHH-Ox), 4.39 (d, *J* = 7.0 Hz, 2H, CH<sub>2</sub>-Fmoc), 4.34 (d, *J* = 7.0 Hz, 1H, OCHH-Ox), 4.30 (d, *J* = 6.5 Hz, 1H, OCHH-Ox), 4.25 (d, *J* = 6.5 Hz, 1H, OCHH-Ox), 4.20 (t, *J* = 7.0 Hz, 1H, CH-Fmoc), 3.68 (dd, *J* = 13.9, 5.0 Hz, 1H, CHHGOx), 3.54 (dd, *J* = 9.1, 3.6 Hz, 1H, CH<sub>α</sub>-Met), 3.45 (dd, *J* = 13.9, 5.0 Hz, 1H, CHHGOx), 2.72–2.60 (br. m, 2H, CH<sub>2</sub>γ-Met), 2.11 (s, 3H, CH<sub>3</sub>, Met), 2.05–1.99 (m, 1H, CHHβ-Met), 1.80 (s, 6H, 2 × CH<sub>3</sub>, cumyl), 1.78–1.72 (m, 1H, CHHβ-Met); **<sup>13</sup>C NMR** (101 MHz, CDCl<sub>3</sub>) δ<sub>C</sub> 174.9 (C=O), 157.0 (C=O, Fmoc), 144.8 (C), 144.0 (C), 141.4 (C), 128.5 (CH), 127.84 (CH), 127.80 (CH), 127.6 (CH), 127.2 (CH), 125.2 (CH), 125.1 (CH), 124.4 (CH), 120.1 (CH), 83.1 (C, cumyl), 79.9 (OCH<sub>2</sub>), 79.6 (OCH<sub>2</sub>), 66.9 (CH<sub>2</sub>, Fmoc), 59.6 (C, Ox), 54.5 (CH, α-Met), 47.4 (CH, Fmoc), 45.6 (CH<sub>2</sub>, GOx), 33.1 (CH<sub>2</sub>, β-Met), 30.6 (CH<sub>2</sub>, γ-Met), 28.4 (CH<sub>3</sub>, cumyl), 28.3 (CH<sub>3</sub>, cumyl), 15.3 (CH<sub>3</sub>, Met). *N.B.* Two aromatic C signals not observed; **v<sub>max</sub>** (neat) = 3329 (NH), 3063, 2929, 2873, 1718 (C=O), 1511, 1448, 1240, 1132, 1100, 970, 759, 740, 698 cm<sup>-1</sup>; **MS** (ESI<sup>+</sup>) *m/z* 575 [M+H]<sup>+</sup>, 597 [M+Na]<sup>+</sup>; **HRMS** (ESI<sup>+</sup>) calcd. for C<sub>33</sub>H<sub>38</sub>N<sub>2</sub>NaO<sub>5</sub>S [M+Na]<sup>+</sup> 597.2394, found 597.2397; [α]<sub>D</sub><sup>30</sup> -8.9 (*c* 1.06, CHCl<sub>3</sub>).

### 5.10 Synthesis of Fmoc-GOx-His(Trt)-OCumyl

#### Fmoc-His(Trt)-OCumyl (**1j**)

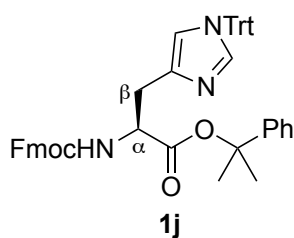

Following general procedure 1, Fmoc-His(Trt)-OH (6.20 g, 10.0 mmol, 1.0 equiv) gave, after column chromatography (SiO<sub>2</sub>, PE/EtOAc 1:1), **1j** (4.90 g, 6.64 mmol, 66%) contaminated with traces of 2-phenyl-2-propanol (~33:1 by <sup>1</sup>H NMR) as a white solid. **R<sub>f</sub>** (PE/EtOAc 1:1) 0.50; **mp** 73–76 °C; **<sup>1</sup>H NMR** (400 MHz, CDCl<sub>3</sub>) δ<sub>H</sub> 7.75 (d, *J* = 7.4 Hz, 2H, ArH), 7.60 (d, *J* = 7.4 Hz, 2H, ArH), 7.41–7.27 (m, 15H, ArH), 7.25–7.14 (m, 4H, ArH), 7.12–7.05 (m, 6H, ArH), 6.62 (s, 1H, ArH), 6.48 (d, *J* = 8.1 Hz, 1H, NH), 4.62 (dd, *J* = 13.0, 5.2 Hz, 1H, CH<sub>α</sub>-His), 4.38–4.24 (m, 2H, CH<sub>2</sub>-Fmoc), 4.21 (t, *J* = 7.5 Hz, 1H, CH-Fmoc), 3.23–2.99 (m, 2H, CH<sub>2</sub>β-His), 1.72 (s, 3H, CH<sub>3</sub>, cumyl), 1.71 (s, 3H, CH<sub>3</sub>, cumyl); **<sup>13</sup>C NMR** (101 MHz, CDCl<sub>3</sub>) δ<sub>C</sub> 170.4 (C=O), 156.3 (C=O, Fmoc), 145.6 (C), 144.2 (C), 144.1 (C), 142.5 (C), 141.4 (C), 138.9 (CH), 136.5 (C), 129.9 (CH), 128.4 (CH), 128.1 (CH), 127.7 (CH), 127.20 (CH), 127.17 (CH), 125.52 (CH), 125.47 (CH), 124.4 (CH), 120.0 (CH), 119.6 (CH), 83.1 (C, cumyl), 75.4 (C, Trt), 67.3 (CH<sub>2</sub>, Fmoc), 54.6 (CH, α-His), 47.3 (CH, Fmoc), 30.3 (CH<sub>2</sub>, β-His), 28.7 (CH<sub>3</sub>, cumyl), 28.4 (CH<sub>3</sub>, cumyl). *N.B.* One aromatic C not observed; **v<sub>max</sub>** (neat) = 3293 (NH), 3060, 2979, 1718 (C=O), 1493, 1446, 1135, 741, 699 cm<sup>-1</sup>; **MS** (ESI<sup>+</sup>) *m/z* 738 [M+H]<sup>+</sup>, 760 [M+Na]<sup>+</sup>; **HRMS** (ESI<sup>+</sup>) calcd. for C<sub>49</sub>H<sub>44</sub>N<sub>3</sub>O<sub>4</sub> [M+H]<sup>+</sup> 738.3326, found 738.3329; [α]<sub>D</sub><sup>29</sup> -0.6 (*c* 1.02, CHCl<sub>3</sub>).

### NO<sub>2</sub>-GOx-His(Trt)-OCumyl (**2j**)

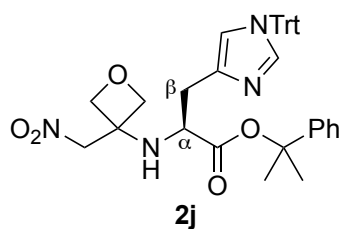

Following general procedure 3, **1j** (3.69 g, 5.00 mmol, 1.0 equiv), oxetan-3-one (640  $\mu$ L, 10.0 mmol, 2.0 equiv) and nitromethane (760  $\mu$ L, 14.0 mmol, 2.8 equiv) were combined to give, after column chromatography (SiO<sub>2</sub>, PE/EtOAc 1:1 $\rightarrow$ 1:3), **2j** (2.14 g, 3.39 mmol, 68%) as an orange foam; **R<sub>f</sub>** (EtOAc) 0.77; **mp** 65–69 °C; **<sup>1</sup>H NMR** (400 MHz, CDCl<sub>3</sub>)  $\delta_{\text{H}}$  7.39 (s, 1H, ArH), 7.35–7.27 (m, 14H, ArH), 7.22 (t,  $J$  = 7.1 Hz, 1H, ArH), 7.16–7.10 (m, 5H, ArH), 6.61 (s, 1H, ArH), 4.74 (d,  $J$  = 13.2 Hz, 1H, NO<sub>2</sub>CHH), 4.64 (d,  $J$  = 13.2 Hz, 1H, NO<sub>2</sub>CHH), 4.46 (d,  $J$  = 7.0 Hz, 1H, OCHH-Ox), 4.40 (d,  $J$  = 7.2 Hz, 1H, OCHH-Ox), 4.37 (d,  $J$  = 7.2 Hz, 1H, OCHH-Ox), 4.31 (d,  $J$  = 7.0 Hz, 1H, OCHH-Ox), 3.83 (dd,  $J$  = 8.6, 4.0 Hz, 1H, CH $\alpha$ -His), 3.05 (dd,  $J$  = 14.3, 4.0 Hz, 1H, CHH $\beta$ -His), 2.97 (dd,  $J$  = 14.3, 8.6 Hz, 1H, CHH $\beta$ -His), 2.52 (br. s, 1H, NH), 1.76 (s, 3H, CH<sub>3</sub>, cumyl), 1.74 (s, 3H, CH<sub>3</sub>, cumyl); **<sup>13</sup>C NMR** (101 MHz, CDCl<sub>3</sub>)  $\delta_{\text{C}}$  173.5 (C=O), 145.2 (C), 142.5 (C), 138.7 (CH), 136.8 (C), 129.9 (CH), 128.4 (CH), 128.2 (CH), 128.1 (CH), 127.4 (CH), 124.5 (CH), 120.0 (CH), 82.9 (C, cumyl), 79.0 (NO<sub>2</sub>CH<sub>2</sub> or OCH<sub>2</sub>), 78.8 (NO<sub>2</sub>CH<sub>2</sub> or OCH<sub>2</sub>), 78.5 (OCH<sub>2</sub>), 75.4 (C, Trt), 59.3 (C, Ox), 56.5 (CH,  $\alpha$ -His), 33.1 (CH<sub>2</sub>,  $\beta$ -His), 28.6 (CH<sub>3</sub>, cumyl), 28.1 (CH<sub>3</sub>, cumyl); **v<sub>max</sub>** (neat) = 3326 (NH), 3060, 2927, 2878, 1729 (C=O), 1552, 1131, 979, 747, 698 cm<sup>-1</sup>; **MS** (ESI<sup>+</sup>)  $m/z$  631 [M+H]<sup>+</sup>, 653 [M+Na]<sup>+</sup>; **HRMS** (ESI<sup>+</sup>) calcd. for C<sub>38</sub>H<sub>39</sub>N<sub>4</sub>O<sub>5</sub> [M+H]<sup>+</sup> 631.2915, found 631.2916; [ $\alpha$ ]<sub>D</sub><sup>30</sup> -11.4 (*c* 1.02, CHCl<sub>3</sub>).

### Fmoc-GOx-His(Trt)-OCumyl (**3j**)

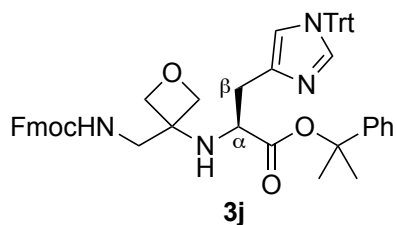

Following general procedure 4, **2j** (1.26 g, 2.00 mmol, 1.0 equiv) gave, after column chromatography (SiO<sub>2</sub>, CH<sub>2</sub>Cl<sub>2</sub>/EtOAc 1:1), **3j** (1.01 g, 1.23 mmol, 61%) as a white foam. **R<sub>f</sub>** (CH<sub>2</sub>Cl<sub>2</sub>/EtOAc 1:1) 0.52; **mp** 76–80 °C; **<sup>1</sup>H NMR** (400 MHz, CDCl<sub>3</sub>)  $\delta_{\text{H}}$  7.75 (d,  $J$  = 7.4 Hz, 2H, ArH), 7.53 (d,  $J$  = 7.4 Hz, 2H, ArH), 7.49 (s, 1H, ArH), 7.34–7.20 (m, 19H, ArH), 7.16–7.00 (m, 5H, ArH), 6.63 (s, 1H, ArH), 6.60 (s, 1H, NH), 4.34 (d,  $J$  = 6.2 Hz, 1H, OCHH-Ox), 4.30 (d,  $J$  = 6.2 Hz, 1H, OCHH-Ox), 4.21 (d,  $J$  = 6.6 Hz, 4H, OCH<sub>2</sub>-Ox, CH<sub>2</sub>-Fmoc), 3.97 (t,  $J$  = 7.2 Hz, 1H, CH-Fmoc), 3.70 (t,  $J$  = 8.6 Hz, 1H, CH $\alpha$ -His), 3.66–3.58 (m, 2H, CH<sub>2</sub>GOx), 3.07 (d,  $J$  = 14.2 Hz, 1H, CHH $\beta$ -His), 2.71 (dd,  $J$  = 14.2, 10.2 Hz, 1H, CHH $\beta$ -His), 1.78 (s, 3H, CH<sub>3</sub>, cumyl), 1.73 (s, 3H, CH<sub>3</sub>, cumyl); **<sup>13</sup>C NMR** (101 MHz, CDCl<sub>3</sub>)  $\delta_{\text{C}}$  173.9 (C=O), 157.2 (C=O, Fmoc), 145.1 (C), 144.20 (C), 144.17 (C), 142.4 (C), 141.3 (C), 139.0 (CH), 137.1 (C), 129.8 (CH), 128.5 (CH), 128.19 (CH), 128.16 (CH), 127.7 (CH), 127.5 (CH), 127.2 (CH), 125.4 (CH), 125.3 (CH), 124.4 (CH), 120.1 (CH), 120.0 (CH), 82.8 (C, cumyl), 80.7 (OCH<sub>2</sub>), 80.3 (OCH<sub>2</sub>), 66.9 (CH<sub>2</sub>, Fmoc), 59.6 (C, Ox), 56.0 (CH,  $\alpha$ -His), 47.3 (CH, Fmoc), 44.6 (CH<sub>2</sub>, GOx), 32.2 (CH<sub>2</sub>,  $\beta$ -His), 28.7 (CH<sub>3</sub>, cumyl), 28.2 (CH<sub>3</sub>, cumyl). *N.B.* One aromatic C not observed; **v<sub>max</sub>** (neat) = 3324 (NH), 3060, 2928, 2869, 1716 (C=O), 1446, 1237, 1131, 974, 741 cm<sup>-1</sup>; **MS** (ESI<sup>+</sup>)  $m/z$  823 [M+H]<sup>+</sup>, 845 [M+Na]<sup>+</sup>; **HRMS** (ESI<sup>+</sup>) calcd. for C<sub>53</sub>H<sub>51</sub>N<sub>4</sub>O<sub>5</sub> [M+H]<sup>+</sup> 823.3854, found 823.3850; [ $\alpha$ ]<sub>D</sub><sup>30</sup> +3.9 (*c* 1.03, CHCl<sub>3</sub>).

### 5.11 Synthesis of Fmoc-GOx-Ser(Trt)-OBn

#### NO<sub>2</sub>-GOx-Ser(Trt)-OBn (**2k**)

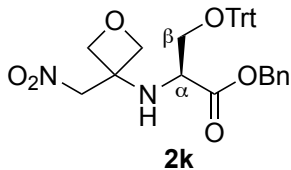

Following general procedure 2, Fmoc-Ser(Trt)-OH (5.70 g, 10.0 mmol, 1.0 equiv), benzyl bromide (1.19 mL, 10.0 mmol, 1.0 equiv) and Cs<sub>2</sub>CO<sub>3</sub> (3.58 g, 11.0 mmol, 1.1 equiv) in DMF (40 mL) gave Fmoc-Ser(Trt)-OBn, which was used without further purification. Following general procedure 3, Fmoc-Ser(Trt)-OBn, oxetan-3-one (1.28 mL, 20.0 mmol, 2.0 equiv) and nitromethane (1.52 mL, 28.0 mmol, 2.8 equiv) were combined to give, after column chromatography (SiO<sub>2</sub>, PE/EtOAc 4:1→2:1), **2k** (1.72 g, 3.12 mmol, 31% over two steps) as a pale yellow foam. **R<sub>f</sub>** (PE/EtOAc 2:1) 0.32; **mp** 42–43 °C; **<sup>1</sup>H NMR** (400 MHz, CDCl<sub>3</sub>) δ<sub>H</sub> 7.40–7.36 (m, 6H, ArH), 7.35–7.26 (m, 14H, ArH), 5.18 (s, 2H, OCH<sub>2</sub>Ph), 4.80 (s, 2H, NO<sub>2</sub>CH<sub>2</sub>), 4.58 (d, *J* = 6.9 Hz, 1H, OCHH-Ox), 4.55–4.43 (m, 3H, OCH<sub>2</sub>-Ox, OCHH-Ox), 3.69 (dd, *J* = 8.5, 4.5 Hz, 1H, CH<sub>α</sub>-Ser), 3.44–3.33 (m, 2H, CH<sub>2</sub>β-Ser), 2.76 (d, *J* = 9.7 Hz, 1H, NH); **<sup>13</sup>C NMR** (126 MHz, CDCl<sub>3</sub>) δ<sub>C</sub> 173.6 (C=O), 143.6 (C), 135.2 (C), 128.74 (CH), 128.70 (CH), 128.68 (CH), 128.0 (CH), 127.3 (CH), 86.9 (C, Trt), 79.0 (NO<sub>2</sub>CH<sub>2</sub> or OCH<sub>2</sub>), 78.8 (NO<sub>2</sub>CH<sub>2</sub> or OCH<sub>2</sub>), 78.7 (NO<sub>2</sub>CH<sub>2</sub> or OCH<sub>2</sub>), 67.6 (CH<sub>2</sub>, Bn), 66.0 (CH<sub>2</sub>, β-Ser), 59.6 (C, Ox), 56.3 (CH, α-Ser). *N.B.* One aromatic CH not observed; **v<sub>max</sub>** (neat) = 3342 (NH), 2954, 2878, 1733 (C=O), 1553, 1491, 1448, 1377, 1183, 1080, 979, 746, 696 cm<sup>-1</sup>; **MS** (ESI<sup>+</sup>) *m/z* 475 [M+Na]<sup>+</sup>, 491 [M+K]<sup>+</sup>; **HRMS** (ESI<sup>+</sup>) calcd. for C<sub>33</sub>H<sub>32</sub>N<sub>2</sub>NaO<sub>6</sub> [M+Na]<sup>+</sup> 475.2153, found 475.2147; [α]<sub>D</sub><sup>28</sup> +1.2 (*c* 0.22, CHCl<sub>3</sub>).

#### Fmoc-GOx-Ser(Trt)-OBn (**3k**)

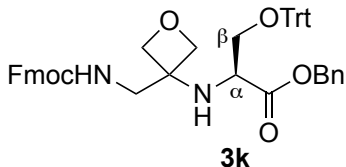

Following general procedure 4, **2k** (1.64 g, 2.97 mmol, 1.0 equiv) gave, after column chromatography (SiO<sub>2</sub>, CH<sub>2</sub>Cl<sub>2</sub>/EtOAc 9:1→4:1), **3k** (1.48 g, 1.99 mmol, 67%) as a white foam. **R<sub>f</sub>** (CH<sub>2</sub>Cl<sub>2</sub>/EtOAc 9:1) 0.28; **mp** 73–74 °C; **<sup>1</sup>H NMR** (400 MHz, CDCl<sub>3</sub>) δ<sub>H</sub> 7.75 (d, *J* = 7.5 Hz, 2H, ArH), 7.56 (d, *J* = 6.9 Hz, 2H, ArH), 7.39 (d, *J* = 7.3 Hz, 8H, ArH), 7.32–7.19 (m, 16H, ArH), 5.24 (br. s, 1H, NH), 5.17 (s, 2H, OCH<sub>2</sub>Ph), 4.45–4.33 (m, 3H, CH<sub>2</sub>-Fmoc, OCHH-Ox), 4.31 (d, *J* = 6.4 Hz, 1H, OCHH-Ox), 4.27 (d, *J* = 6.4 Hz, 1H, OCHH-Ox), 4.24 (d, *J* = 6.4 Hz, 1H, OCHH-Ox), 4.19 (t, *J* = 6.7 Hz, 1H, CH-Fmoc), 3.63 (dd, *J* = 13.7, 5.7 Hz, 1H, CHHGox), 3.53–3.50 (m, 1H, CH<sub>α</sub>-Ser), 3.43 (dd, *J* = 13.7, 4.5 Hz, 1H, CHHGox), 3.40 (dd, *J* = 8.4, 4.8 Hz, 1H, CHHβ-Ser), 3.35 (dd, *J* = 8.4, 4.4 Hz, 1H, CHHβ-Ser), 2.39 (br. s, 1H, NH); **<sup>13</sup>C NMR** (126 MHz, CDCl<sub>3</sub>) δ<sub>C</sub> 174.1 (C=O), 157.0 (C=O, Fmoc), 144.1 (C), 144.0 (C), 143.6 (C), 141.4 (C), 135.2 (C), 128.8 (CH), 128.74 (CH), 128.70 (CH), 128.6 (CH), 128.1 (CH), 127.8 (CH), 127.4 (CH), 127.2 (CH), 125.2 (CH), 120.1 (CH), 87.1 (C, Trt), 79.8 (OCH<sub>2</sub>), 79.7 (OCH<sub>2</sub>), 67.6 (CH<sub>2</sub>, Bn), 67.0 (CH<sub>2</sub>, Fmoc), 66.0 (CH<sub>2</sub>, β-Ser), 59.5 (C, Ox), 56.2 (CH, α-Ser), 47.4 (CH, Fmoc), 45.4 (CH<sub>2</sub>, GOx). *N.B.* One aromatic C not observed; **v<sub>max</sub>** (neat) = 3330 (NH), 2947, 2875, 1719 (C=O), 1515, 1491, 1448, 1221, 1152, 1080, 741, 697 cm<sup>-1</sup>; **MS** (ESI<sup>+</sup>) *m/z* 767 [M+Na]<sup>+</sup>, 783 [M+K]<sup>+</sup>; **HRMS** (ESI<sup>+</sup>) calcd. for C<sub>48</sub>H<sub>44</sub>N<sub>2</sub>NaO<sub>6</sub> [M+Na]<sup>+</sup> 767.3092, found 767.3098; [α]<sub>D</sub><sup>29</sup> +3.4 (*c* 0.50, CHCl<sub>3</sub>).

## 5.12 Synthesis of Fmoc-GOx-Thr(Trt)-OBn

### NO<sub>2</sub>-GOx-Thr(Trt)-OBn (**2l**)

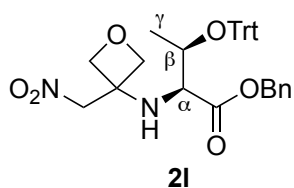

Following general procedure 2, Fmoc-Thr(Trt)-OH (5.84 g, 10.0 mmol, 1.0 equiv), benzyl bromide (1.19 mL, 10.0 mmol, 1.0 equiv) and Cs<sub>2</sub>CO<sub>3</sub> (3.58 g, 11.0 mmol, 1.1 equiv) in DMF (40 mL) gave Fmoc-Thr(Trt)-OBn, which was used without further purification. Following general procedure 3, Fmoc-Thr(Trt)-OBn, oxetan-3-one (1.28 mL, 20.0 mmol, 2.0 equiv) and nitromethane (1.52 mL, 28.0 mmol, 2.8 equiv) were combined to give, after column chromatography (SiO<sub>2</sub>, PE/EtOAc 9:1→4:1→2:1), **2l** (1.58 g, 2.79 mmol, 28% over two steps) as a pale yellow foam. **R<sub>f</sub>** (PE/EtOAc 4:1) 0.09; **mp** 46–47 °C; **<sup>1</sup>H NMR** (400 MHz, CDCl<sub>3</sub>) δ<sub>H</sub> ppm 7.45 (d, *J* = 6.8 Hz, 6H, ArH), 7.37–7.32 (m, 3H, ArH), 7.31–7.25 (m, 11H, ArH), 5.19 (d, *J* = 12.0 Hz, 1H, OCHHPh), 4.99 (d, *J* = 12.0 Hz, 1H, OCHHPh), 4.64 (s, 2H, NO<sub>2</sub>CH<sub>2</sub>), 4.42 (d, *J* = 6.8 Hz, 2H, 2 × OCHH-Ox), 4.38 (d, *J* = 6.8 Hz, 1H, OCHH-Ox), 4.34 (d, *J* = 6.8 Hz, 1H, OCHH-Ox), 3.87–3.80 (m, 1H, CHβ-Thr), 3.12 (dd, *J* = 10.0, 2.5 Hz, 1H, CHα-Thr), 2.67 (d, *J* = 10.0 Hz, 1H, NH), 0.98 (d, *J* = 5.9 Hz, 3H, CH<sub>3</sub>γ-Thr); **<sup>13</sup>C NMR** (126 MHz, CDCl<sub>3</sub>) δ<sub>C</sub> 174.0 (C=O), 144.8 (C), 135.2 (C), 129.1 (CH), 128.9 (CH), 128.7 (CH), 128.6 (CH), 127.8 (CH), 127.2 (CH), 87.0 (C, Trt), 78.9 (NO<sub>2</sub>CH<sub>2</sub>), 78.7 (OCH<sub>2</sub>), 78.4 (OCH<sub>2</sub>), 72.2 (CH, β-Thr), 67.6 (CH<sub>2</sub>, Bn), 60.0 (CH, α-Thr), 59.4 (C, Ox), 17.3 (CH<sub>3</sub>, γ-Thr); **v<sub>max</sub>** (neat) = 3333 (NH), 2947, 2873, 1728 (C=O), 1553, 1490, 1447, 1377, 1174, 1082, 980, 746, 696 cm<sup>-1</sup>; **MS** (ESI<sup>+</sup>) *m/z* 589 [M+Na]<sup>+</sup>, 605 [M+K]<sup>+</sup>; **HRMS** (ESI<sup>+</sup>) calcd. for C<sub>34</sub>H<sub>34</sub>N<sub>2</sub>NaO<sub>6</sub> [M+Na]<sup>+</sup> 589.2309, found 589.2306; [α]<sub>D</sub><sup>27</sup> +11.7 (*c* 0.29, CHCl<sub>3</sub>).

### Fmoc-GOx-Thr(Trt)-OBn (**3l**)

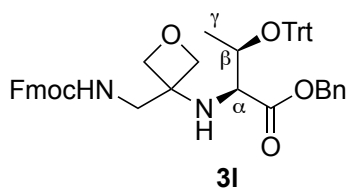

Following general procedure 4, **2l** (1.45 g, 2.56 mmol, 1.0 equiv) gave, after column chromatography (SiO<sub>2</sub>, CH<sub>2</sub>Cl<sub>2</sub>/EtOAc 9:1→4:1), **3l** (1.16 g, 1.53 mmol, 60%) as a white foam. **R<sub>f</sub>** (CH<sub>2</sub>Cl<sub>2</sub>:EtOAc 9:1) 0.37; **mp** 79–81 °C; **<sup>1</sup>H NMR** (400 MHz, CDCl<sub>3</sub>) δ<sub>H</sub> 7.80 (d, *J* = 7.6 Hz, 2H, ArH), 7.63 (d, *J* = 7.3 Hz, 2H, ArH), 7.47 (d, *J* = 6.7 Hz, 6H, ArH), 7.37–7.24 (m, 18H, ArH), 5.20 (d, *J* = 12.2 Hz, 1H, OCHHPh), 5.17 (br. s, 1H, NH), 4.98 (d, *J* = 12.2 Hz, 1H, OCHHPh), 4.45 (d, *J* = 6.6 Hz, 2H, CH<sub>2</sub>-Fmoc), 4.34–4.15 (m, 5H, 2 × OCH<sub>2</sub>-Ox, CH-Fmoc), 3.87–3.80 (m, 1H, CHβ-Thr), 3.49 (dd, *J* = 13.4, 5.2 Hz, 1H, CHH-GOx), 3.34 (dd, *J* = 13.4, 3.9 Hz, 1H, CHH-GOx), 2.99 (br. s, 1H, CHα-Thr), 2.37 (br. s, 1H, NH), 1.05 (d, *J* = 5.5 Hz, 3H, CH<sub>3</sub>γ-Thr); **<sup>13</sup>C NMR** (126 MHz, CDCl<sub>3</sub>) δ<sub>C</sub> 174.7 (C=O), 156.9 (C=O, Fmoc), 144.7 (C), 144.1 (C), 144.0 (C), 141.5 (C), 135.2 (C), 129.1 (CH), 128.8 (CH), 128.72 (CH), 128.66 (CH), 127.8 (CH), 127.3 (CH), 127.2 (CH), 125.2 (CH), 120.1 (CH), 87.1 (C, Trt), 79.6 (OCH<sub>2</sub>), 79.4 (OCH<sub>2</sub>), 72.2 (CH, β-Thr), 67.5 (CH<sub>2</sub>, Bn), 67.0 (CH<sub>2</sub>, Fmoc), 59.9 (CH, α-Thr), 59.4 (C, Ox), 47.4 (CH, Fmoc), 45.5 (CH<sub>2</sub>, GOx), 17.5 (CH<sub>3</sub>, γ-Thr). *N.B.* One aromatic C and one aromatic CH signal not observed; **v<sub>max</sub>** (neat) = 3345 (NH), 2942, 2873, 1720 (C=O), 1515, 1490, 1218, 1184, 1081, 972, 741, 697 cm<sup>-1</sup>; **MS** (ESI<sup>+</sup>) *m/z* 781 [M+Na]<sup>+</sup>; **HRMS** (ESI<sup>+</sup>) calcd. for C<sub>49</sub>H<sub>46</sub>N<sub>2</sub>NaO<sub>6</sub> [M+Na]<sup>+</sup> 781.3248, found 781.3251; [α]<sub>D</sub><sup>27</sup> +29.5 (*c* 0.52, CHCl<sub>3</sub>).

### 5.13 Synthesis of Fmoc-GOx-His(Trt)-OBn

#### NO<sub>2</sub>-GOx-His(Trt)-OBn (**2m**)

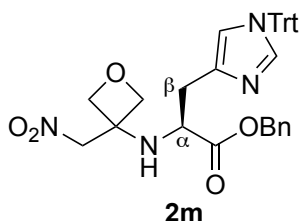

Following general procedure 2, Fmoc-His(Trt)-OH (6.20 g, 10.0 mmol, 1.0 equiv), benzyl bromide (1.19 mL, 10.0 mmol, 1.0 equiv) and Cs<sub>2</sub>CO<sub>3</sub> (3.58 g, 11.0 mmol, 1.1 equiv) in DMF (40 mL) gave Fmoc-His(Trt)-OBn, which was used without further purification. Following general procedure 3, Fmoc-His(Trt)-OBn, oxetan-3-one (1.28 mL, 20.0 mmol, 2.0 equiv) and nitromethane (1.52 mL, 28.0 mmol, 2.8 equiv) were combined to give, after column chromatography (SiO<sub>2</sub>, PE/EtOAc 3:1→2:1→1:1→EtOAc), **2m** (3.84 g, 6.37 mmol, 64% over two steps) as an orange foam. **R<sub>f</sub>** (EtOAc) 0.41; **mp** 62–64 °C; **<sup>1</sup>H NMR** (400 MHz, CDCl<sub>3</sub>) δ<sub>H</sub> ppm 7.38 (s, 1H, ArH), 7.36–7.28 (m, 14H, ArH), 7.15–7.08 (m, 6H, ArH), 6.57 (s, 1H, ArH), 5.11 (d, *J* = 12.1 Hz, 1H, OCHHPh), 5.03 (d, *J* = 12.1 Hz, 1H, OCHHPh), 4.78 (d, *J* = 13.2 Hz, 1H, NO<sub>2</sub>CHH), 4.71 (d, *J* = 13.2 Hz, 1H, NO<sub>2</sub>CHH), 4.48 (d, *J* = 6.9 Hz, 1H, OCHH-Ox), 4.43 (d, *J* = 7.0 Hz, 1H, OCHH-Ox), 4.38 (d, *J* = 7.0 Hz, 1H, OCHH-Ox), 4.32 (d, *J* = 6.9 Hz, 1H, OCHH-Ox), 3.83 (br. s, 1H, CH<sub>α</sub>-His), 2.95 (dd, *J* = 14.2, 4.1 Hz, 1H, CHHβ-His), 2.80 (dd, *J* = 14.1, 8.1 Hz, 1H, CHHβ-His), 2.64 (br. s, 1H, NH); **<sup>13</sup>C NMR** (126 MHz, CDCl<sub>3</sub>) δ<sub>C</sub> ppm 174.6 (C=O), 142.4 (C), 136.4 (C), 135.4 (C), 129.9 (CH), 128.7 (CH), 128.6 (CH), 128.21 (CH), 128.20 (CH), 120.1 (CH), 79.2 (OCH<sub>2</sub>), 78.6 (OCH<sub>2</sub>), 78.3 (NO<sub>2</sub>CH<sub>2</sub>), 75.4 (C, Trt), 67.2 (CH<sub>2</sub>, Bn), 59.4 (C, Ox), 56.3 (CH, α-His), 32.8 (CH<sub>2</sub>, β-His). *N.B.* Two aromatic CH signals not observed; **v<sub>max</sub>** (neat) = 3332 (NH), 2946, 2872, 1724 (C=O), 1550, 1445, 1155, 981, 744, 697 cm<sup>-1</sup>; **MS** (ESI<sup>+</sup>) *m/z* 603 [M+H]<sup>+</sup>, 625 [M+Na]<sup>+</sup>; **HRMS** (ESI<sup>+</sup>) calcd. for C<sub>36</sub>H<sub>35</sub>N<sub>4</sub>O<sub>5</sub> [M+H]<sup>+</sup> 603.2602, found 603.2601; [α]<sub>D</sub><sup>28</sup> -5.1 (*c* 0.22, CHCl<sub>3</sub>).

#### Fmoc-GOx-His(Trt)-OBn (**3m**)

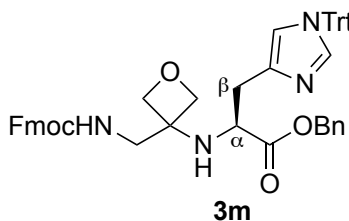

Following general procedure 4, **2m** (3.71 g, 6.16 mmol, 1.0 equiv) gave, after column chromatography (SiO<sub>2</sub>, CH<sub>2</sub>Cl<sub>2</sub>/EtOAc 1:1→EtOAc), **3m** (3.40 g, 4.28 mmol, 69%) as an off-white foam. **R<sub>f</sub>** (EtOAc) 0.39; **mp** 73–74 °C; **<sup>1</sup>H NMR** (400 MHz, CDCl<sub>3</sub>) δ<sub>H</sub> ppm 7.75 (d, *J* = 7.4 Hz, 2H, ArH), 7.55 (d, *J* = 7.2 Hz, 2H, ArH), 7.47 (s, 1H, ArH), 7.41–7.27 (m, 9H, ArH), 7.26–7.20 (m, 9H, ArH), 7.12–7.04 (m, 6H, ArH), 6.78 (s, 1H, NH), 6.57 (s, 1H, ArH), 5.14 (d, *J* = 12.0 Hz, 1H, OCHHPh), 5.08 (d, *J* = 12.0 Hz, 1H, OCHHPh), 4.46–4.15 (m, 6H, 2 × OCH<sub>2</sub>-Ox, CH<sub>2</sub>-Fmoc), 3.98 (t, *J* = 6.9 Hz, 1H, CH-Fmoc), 3.79 (d, *J* = 8.7 Hz, 1H, CH<sub>α</sub>-His), 3.68 (dd, *J* = 13.8, 6.1 Hz, 1H, CHHGOx), 3.61 (dd, *J* = 13.8, 3.0 Hz, 1H, CHHGOx), 2.99 (dd, *J* = 14.6, 2.2 Hz, 1H, CHHβ-His), 2.80 (dd, *J* = 14.6, 9.2 Hz, 1H, CHHβ-His), 1.85 (br. s, 1H, NH); **<sup>13</sup>C NMR** (126 MHz, CDCl<sub>3</sub>) δ<sub>C</sub> ppm 175.0 (C=O), 157.3 (C=O, Fmoc), 144.21 (C), 144.16 (C), 142.3 (C), 141.4 (C), 139.0 (CH), 137.0 (C), 135.4 (C), 129.9 (CH), 129.81 (CH), 128.80 (CH), 128.7 (CH), 128.6 (CH), 128.19 (CH), 128.15 (CH), 127.7 (CH), 127.17 (CH), 127.15 (CH), 125.4 (CH), 125.3 (CH), 120.03 (CH), 119.99 (CH), 80.8 (OCH<sub>2</sub>), 80.2 (OCH<sub>2</sub>), 75.5 (C, Trt), 67.2 (CH<sub>2</sub>, Bn), 66.9 (CH<sub>2</sub>, Fmoc), 59.6 (C, Ox), 55.5 (CH, α-His), 47.3 (CH, Fmoc), 44.4 (CH<sub>2</sub>, GOx), 32.0 (CH<sub>2</sub>, β-His); *N.B.* One aromatic C not observed; **v<sub>max</sub>** (neat) = 3331 (NH), 2947, 2870, 1716 (C=O), 1493, 1446, 1238, 1155, 974, 742, 699 cm<sup>-1</sup>; **MS** (ESI<sup>+</sup>) *m/z* 795 [M+H]<sup>+</sup>, 817 [M+Na]<sup>+</sup>; **HRMS** (ESI<sup>+</sup>) calcd. for C<sub>51</sub>H<sub>46</sub>N<sub>4</sub>NaO<sub>5</sub> [M+Na]<sup>+</sup> 817.3360, found 817.3358; [α]<sub>D</sub><sup>28</sup> +7.1 (*c* 0.54, CHCl<sub>3</sub>).

## 6. Peptide couplings of selected oxetane modified glycine building blocks

### Fmoc-GOx-Thr(Trt)-Ala-OMe (24)

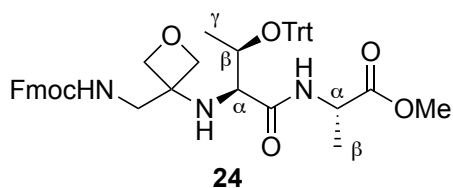

To a solution of Fmoc-GOx-Thr(Trt)-OBn (**3l**) (379 mg, 0.50 mmol, 1.0 equiv) in DMF (5.0 mL) was added 10 wt% Pd/C (38 mg, 10 wt%) and the reaction flask was evacuated, filled with nitrogen, evacuated, and placed under an atmosphere of hydrogen (balloon). The reaction mixture was stirred at room temperature for 2 h, placed under nitrogen and filtered through a plug of Celite, which was washed with DMF (15 mL). H-Ala-OMe·HCl (140 mg, 1.00 mmol, 2.0 equiv), HATU (190 mg, 0.50 mmol, 1.0 equiv) and DIPEA (523  $\mu$ L, 3.00 mmol, 5.0 equiv) were added subsequently, and the reaction mixture was stirred at room temperature for 20 h. The mixture was concentrated under reduced pressure, CH<sub>2</sub>Cl<sub>2</sub> (20 mL) was added and washed with 10% citric acid (2  $\times$  20 mL) and saturated NaHCO<sub>3</sub> solution (2  $\times$  20 mL), dried over MgSO<sub>4</sub>, filtered and concentrated *in vacuo*. The residue was purified by column chromatography (SiO<sub>2</sub>, PE:EtOAc 1:1  $\rightarrow$  EtOAc) to give tripeptide **24** (244 mg, 0.32 mmol, 65%) as a white foam. **R<sub>f</sub>** (PE:EtOAc 1:1) 0.16; **mp** 81–83 °C; **<sup>1</sup>H NMR** (400 MHz, CDCl<sub>3</sub>)  $\delta$ <sub>H</sub> ppm 7.76 (d, *J* = 7.5 Hz, 2H, ArH), 7.59 (dd, *J* = 7.1, 4.3 Hz, 2H, ArH), 7.53 (d, *J* = 7.7 Hz, 6H, ArH), 7.39 (t, *J* = 7.4 Hz, 2H, ArH), 7.35–7.26 (m, 12H, ArH, NH), 5.72 (t, *J* = 4.7 Hz, 1H, NH), 4.52 (quint, *J* = 7.2 Hz, 1H, CH $\beta$ -Thr), 4.38–4.30 (m, 2H, CH<sub>2</sub>-Fmoc), 4.20 (t, *J* = 7.0 Hz, 2H, CH-Fmoc, OCHH-Ox), 4.11 (d, *J* = 5.9 Hz, 1H, OCHH-Ox), 4.07 (d, *J* = 6.4 Hz, 1H, OCHH-Ox), 4.03 (d, *J* = 6.4 Hz, 1H, OCHH-Ox), 3.85 (quint, *J* = 4.9 Hz, 1H, CH $\alpha$ -Ala), 3.79 (s, 3H, OCH<sub>3</sub>), 3.47 (dd, *J* = 13.6, 7.0 Hz, 1H, CHH-GOx), 3.03 (dd, *J* = 13.6, 3.4 Hz, 1H, CHH-GOx), 2.53 (d, *J* = 3.2 Hz, 1H, CH $\alpha$ -Thr), 2.39 (br. s, 1H, NH), 1.36 (d, *J* = 7.2 Hz, 3H, CH<sub>3</sub> $\gamma$ -Thr), 1.19 (d, *J* = 6.0 Hz, 3H, CH<sub>3</sub> $\beta$ -Ala); **<sup>13</sup>C NMR** (126 MHz, CDCl<sub>3</sub>)  $\delta$ <sub>C</sub> ppm 173.5 (C=O), 173.1 (C=O), 157.1 (C=O, Fmoc), 144.3 (C), 144.1 (C), 141.4 (C), 128.8 (CH), 128.3 (CH), 127.8 (CH), 127.7 (CH), 127.2 (CH), 125.4 (CH), 125.3 (CH), 120.1 (CH), 88.4 (C, Trt), 79.6 (OCH<sub>2</sub>), 79.2 (OCH<sub>2</sub>), 73.3 (CH,  $\alpha$ -Ala), 67.0 (CH<sub>2</sub>, Fmoc), 59.6 (C, Ox), 58.6 (CH,  $\alpha$ -Thr), 52.6 (OCH<sub>3</sub>), 48.6 (CH,  $\beta$ -Thr), 47.3 (CH, Fmoc), 45.5 (CH<sub>2</sub>, GOx), 18.0 (CH<sub>3</sub>,  $\gamma$ -Thr), 16.4 (CH<sub>3</sub>,  $\beta$ -Ala). *N.B.* Two aromatic C signals not observed. **v<sub>max</sub>** (neat) = 3332 (NH), 2948, 2874, 1718 (C=O), 1669 (C=O), 1514, 1448, 1219, 1152, 1012, 741, 706 cm<sup>-1</sup>; **MS** (ESI<sup>+</sup>) *m/z* 776 [M+Na]<sup>+</sup>; **HRMS** (ESI<sup>+</sup>) calcd. for C<sub>46</sub>H<sub>47</sub>N<sub>3</sub>NaO<sub>7</sub> [M+Na]<sup>+</sup> 776.3306, found 776.3297; [ $\alpha$ ]<sub>D</sub><sup>28</sup> +13.2 (*c* 0.50, CHCl<sub>3</sub>).

### Fmoc-GOx-His(Trt)-Ala-OMe (25)

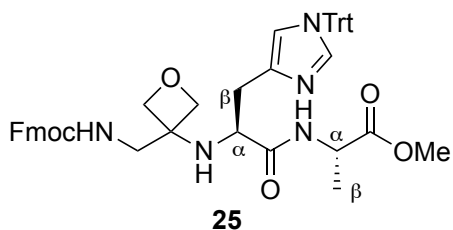

To a solution of Fmoc-GOx-His(Trt)-OBn (**3m**) (397 mg, 0.50 mmol, 1.0 equiv) in DMF (5.0 mL) was added 10 wt% Pd/C (40 mg, 10 wt%) and the reaction flask was evacuated, filled with nitrogen, evacuated, and placed under an atmosphere of hydrogen (balloon). The reaction mixture was stirred at room temperature for 2 h, placed under nitrogen and filtered through a plug of Celite, which was washed with DMF (15 mL). H-Ala-OMe·HCl (140 mg, 1.00 mmol, 2.0 equiv), HATU (190 mg, 0.50 mmol,

1.0 equiv) and DIPEA (523  $\mu$ L, 3.00 mmol, 5.0 equiv) were added subsequently, and the reaction mixture was stirred at room temperature for 16 h. The mixture was concentrated under reduced pressure,  $\text{CH}_2\text{Cl}_2$  (20 mL) was added and washed with 10% citric acid ( $2 \times 20$  mL) and saturated  $\text{NaHCO}_3$  solution ( $2 \times 20$  mL), dried over  $\text{MgSO}_4$ , filtered and concentrated *in vacuo*. The residue was purified by column chromatography ( $\text{SiO}_2$ ,  $\text{CH}_2\text{Cl}_2/\text{MeOH}$  97.5:2.5 $\rightarrow$ 95:5) to give tripeptide **25** (221 mg, 0.28 mmol, 56%) as a pale yellow oil. **R<sub>f</sub>** ( $\text{CH}_2\text{Cl}_2/\text{MeOH}$  95:5) 0.16; **MS** ( $\text{ESI}^+$ )  $m/z$  790  $[\text{M}+\text{H}]^+$ , 812  $[\text{M}+\text{Na}]^+$ ; **HRMS** ( $\text{ESI}^+$ ) calcd. for  $\text{C}_{48}\text{H}_{48}\text{N}_5\text{O}_6$   $[\text{M}+\text{Na}]^+$  790.3599, found 790.3605.

### Fmoc-Trp-GOx-Ser(Trt)-Ala-OH (**26**)

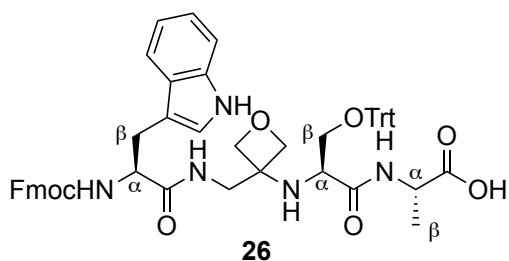

To a solution of Fmoc-GOx-Ser(Trt)-OBn (**3k**) (372 mg, 0.50 mmol, 5.0 equiv) in DMF (2.0 mL) was added 10 wt% Pd/C (37 mg, 10 wt%) and the reaction flask was evacuated, filled with nitrogen, evacuated, and placed under an atmosphere of hydrogen (balloon). The reaction mixture was stirred at room temperature for 1.5 h, placed under nitrogen and filtered through a plug of Celite, which was washed with DMF (8.0 mL). The filtrate of Fmoc-GOx-Ser(Trt)-OH (**4k**) was used for SPPS without further purification. Fmoc-Ala-2-chlorotrityl resin (192 mg, 0.10 mmol, 1.0 equiv) was placed in a 10 mL reaction vessel and the resin was pre-swollen in DMF (2.0 mL) for 30 min. The Fmoc group was deprotected with 20% piperidine in DMF (2.0 mL) for 20 min at room temperature and the resin was washed with DMF ( $5 \times 2.0$  mL). HATU (190 mg, 0.50 mmol, 5.0 equiv) and DIPEA (174  $\mu$ L, 1.00 mmol, 10 equiv) were added to the filtrate of **4k** and the coupling solution was added to the resin. The coupling reaction was allowed to proceed for 2 h at room temperature under slight agitation. The resin was filtered, washed with DMF ( $5 \times 2.0$  mL) before the Fmoc group was removed with 20% piperidine in DMF (2.0 mL) for 20 min at room temperature. After washing the resin with DMF ( $5 \times 2.0$  mL), Fmoc-Trp-OH (213 mg, 0.50 mmol, 5.0 equiv) was coupled with HATU (190 mg, 0.50 mmol, 5.0 equiv), DIPEA (174  $\mu$ L, 1.00 mmol, 10 equiv) in DMF (2.0 mL) for 1 h at room temperature. The resin was washed with DMF ( $5 \times 2.0$  mL) before the Fmoc-group was removed as described before. The tetrapeptide was then cleaved from the resin with TFE in  $\text{CH}_2\text{Cl}_2$  (1:4, 2.5 mL) for 1 h at room temperature. This was repeated twice and the combined cleavage solutions were evaporated to dryness under reduced pressure. Tetrapeptide **26** was obtained as an off-white solid (84 mg, 92  $\mu$ mol) in 92% crude yield over all steps. **MS** ( $\text{ESI}^-$ )  $m/z$  910  $[\text{M}-\text{H}]^-$ ; **HRMS** ( $\text{ESI}^-$ ) calcd. for  $\text{C}_{55}\text{H}_{52}\text{N}_5\text{O}_8$   $[\text{M}-\text{H}]^-$  910.3821, found 910.3820.



## 7. References

- [1] S. Roesner, G. J. Saunders, I. Wilkening, E. Jayawant, J. V. Geden, P. Kerby, A. M. Dixon, R. Notman and M. Shipman, *Chem. Sci.*, 2019, **10**, 2465–2472.
- [2] J. P. Phelan, E. J. Patel and J. A. Ellman, *Angew. Chem. Int. Ed.*, 2014, **53**, 11329–11332.
- [3] G. P. Möller, S. Müller, B. T. Wolfstädter, S. Wolfrum, D. Schepmann, B. Wünsch and E. M. Carreira, *Org. Lett.*, 2017, **19**, 2510–2513.
- [4] C. Yue, J. Thierry and P. Potier, *Tetrahedron Lett.*, 1993, **34**, 323–326.

## 8. $^1\text{H}$ NMR and $^{13}\text{C}$ NMR spectra

### 2-Phenylpropan-2-yl [3-(( $\pm$ )-1-nitroethyl)oxetan-3-yl]-L-alaninate (7)

$^1\text{H}$  NMR (500 MHz,  $\text{CDCl}_3$ )

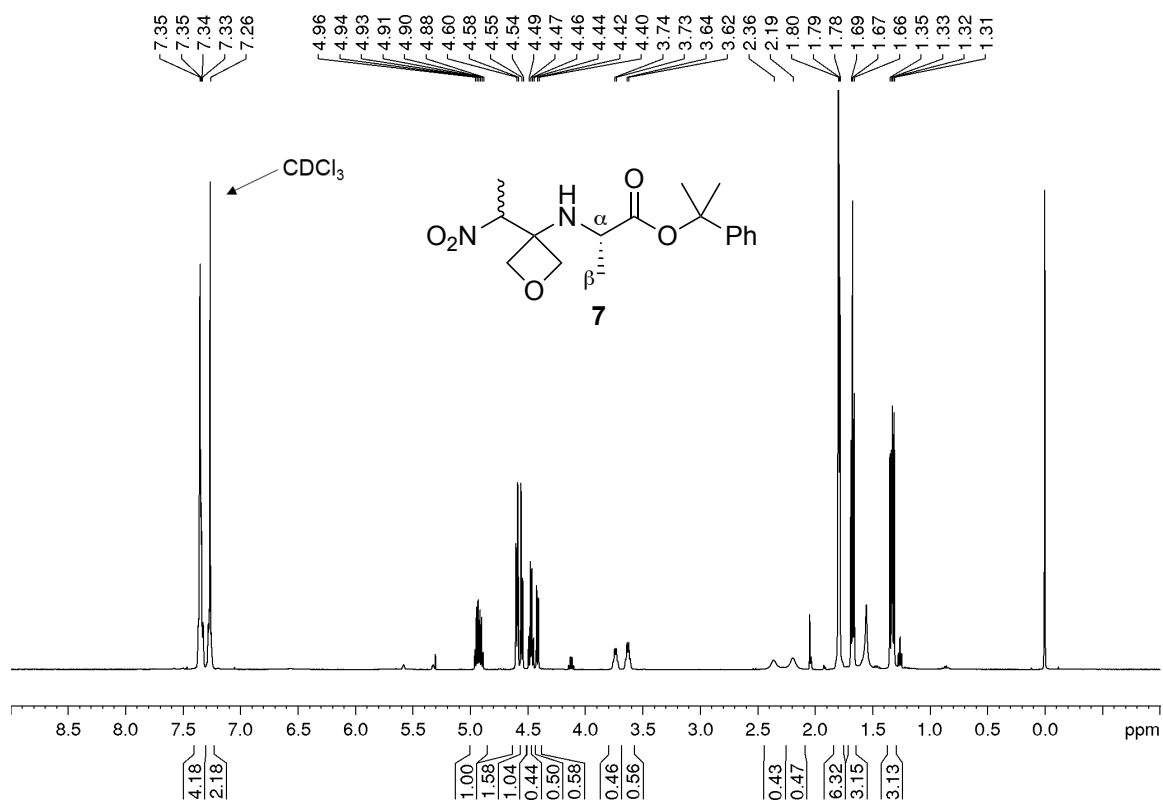

$^{13}\text{C}$  NMR (126 MHz,  $\text{CDCl}_3$ )

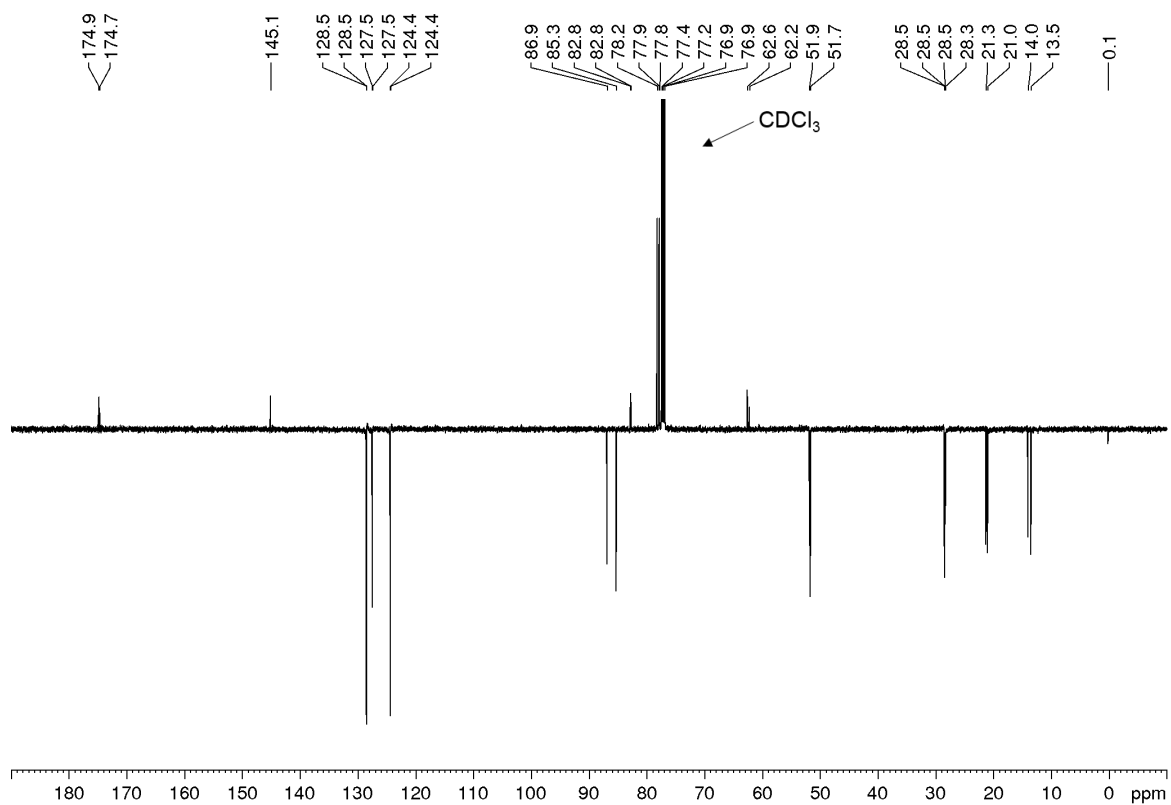

# Fmoc-L-AOx-Ala-OCumyl and Fmoc-D-AOx-Ala-OCumyl ( $\pm, S$ )-14

$^1\text{H}$  NMR (500 MHz,  $\text{CDCl}_3$ )

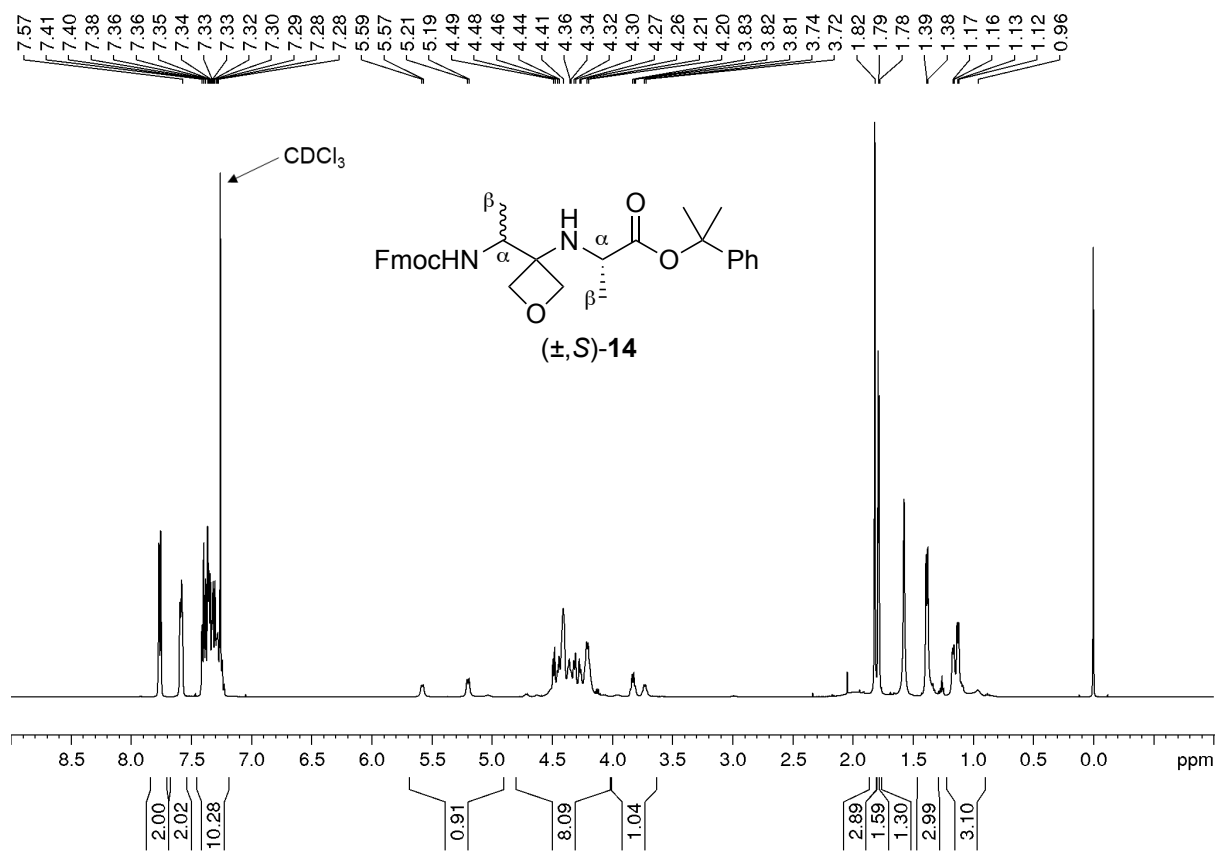

$^{13}\text{C}$  NMR (126 MHz,  $\text{CDCl}_3$ )

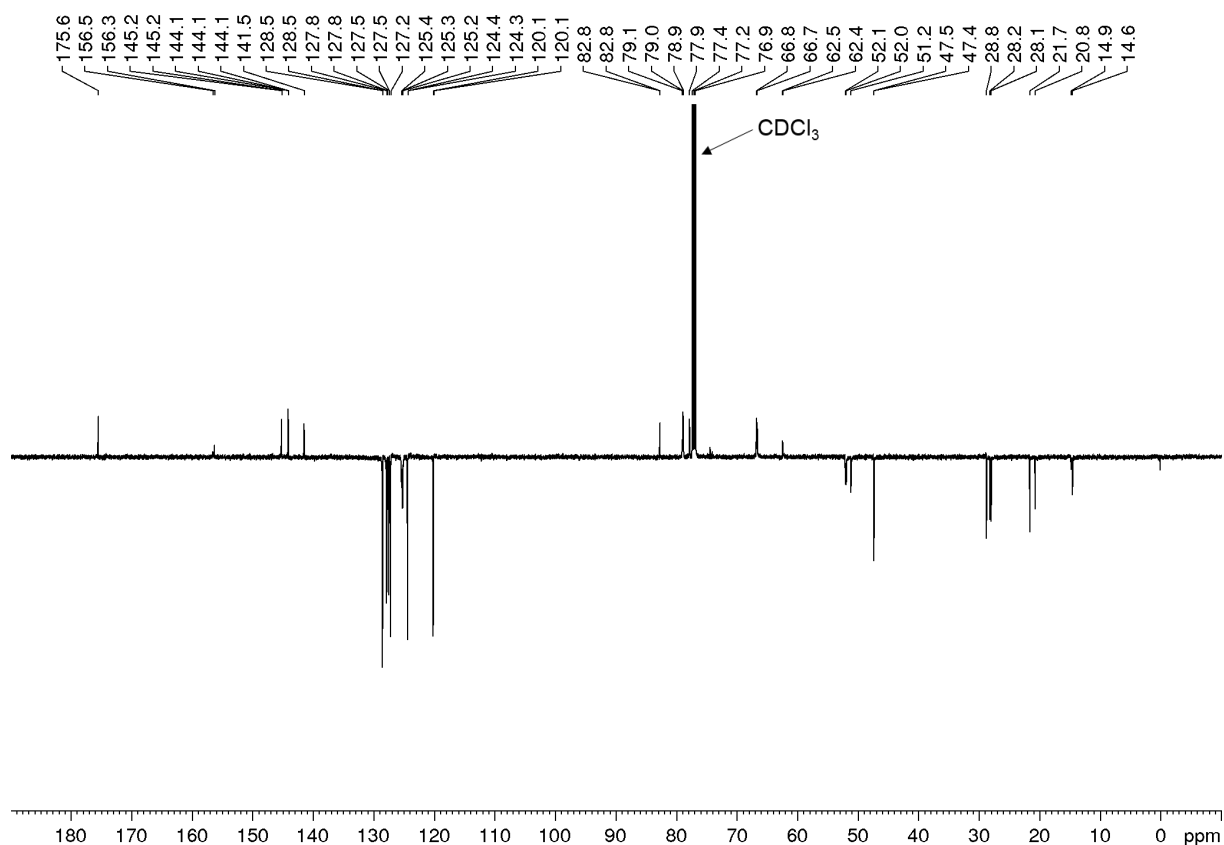

### 3-((*R*)-1-Nitroethyl)-*N*-((*S*)-1-phenylethyl)oxetan-3-amine ((*R,S*)-9)

$^1\text{H}$  NMR (500 MHz,  $\text{CDCl}_3$ )

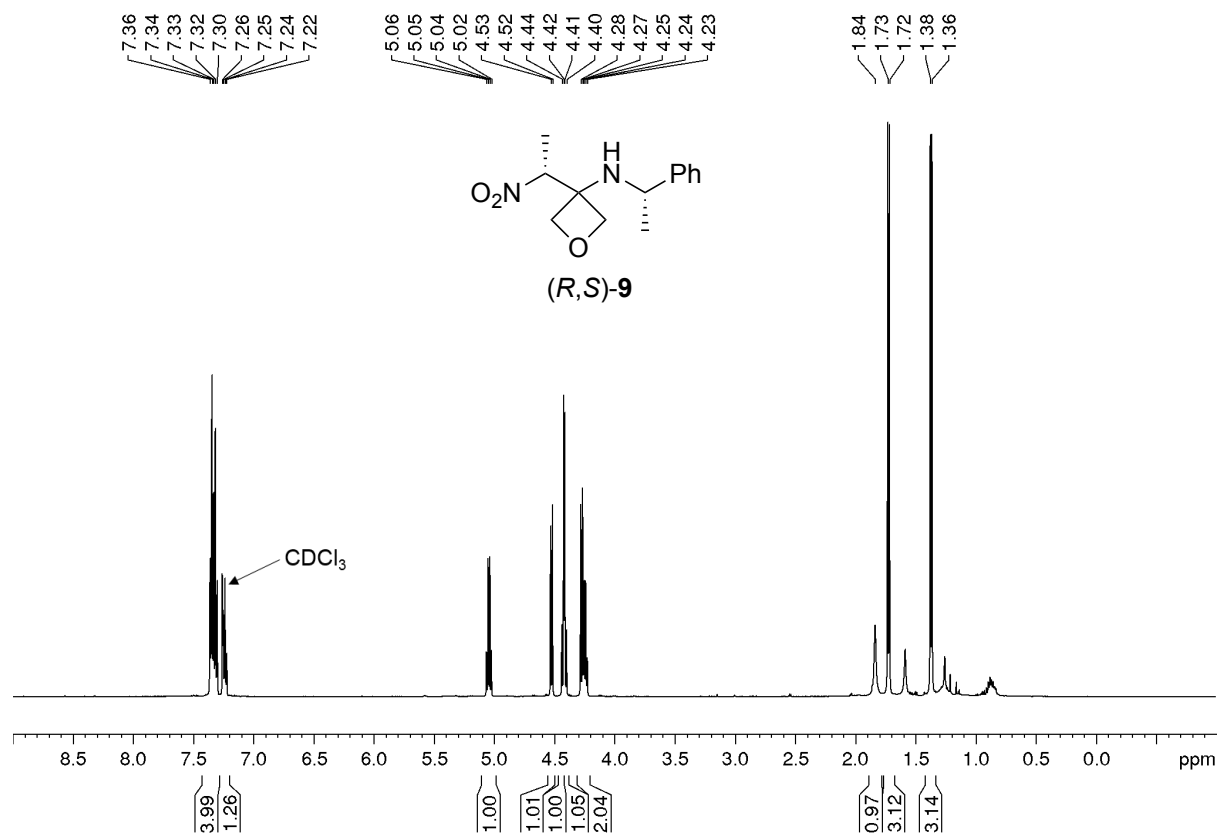

$^{13}\text{C}$  NMR (126 MHz,  $\text{CDCl}_3$ )

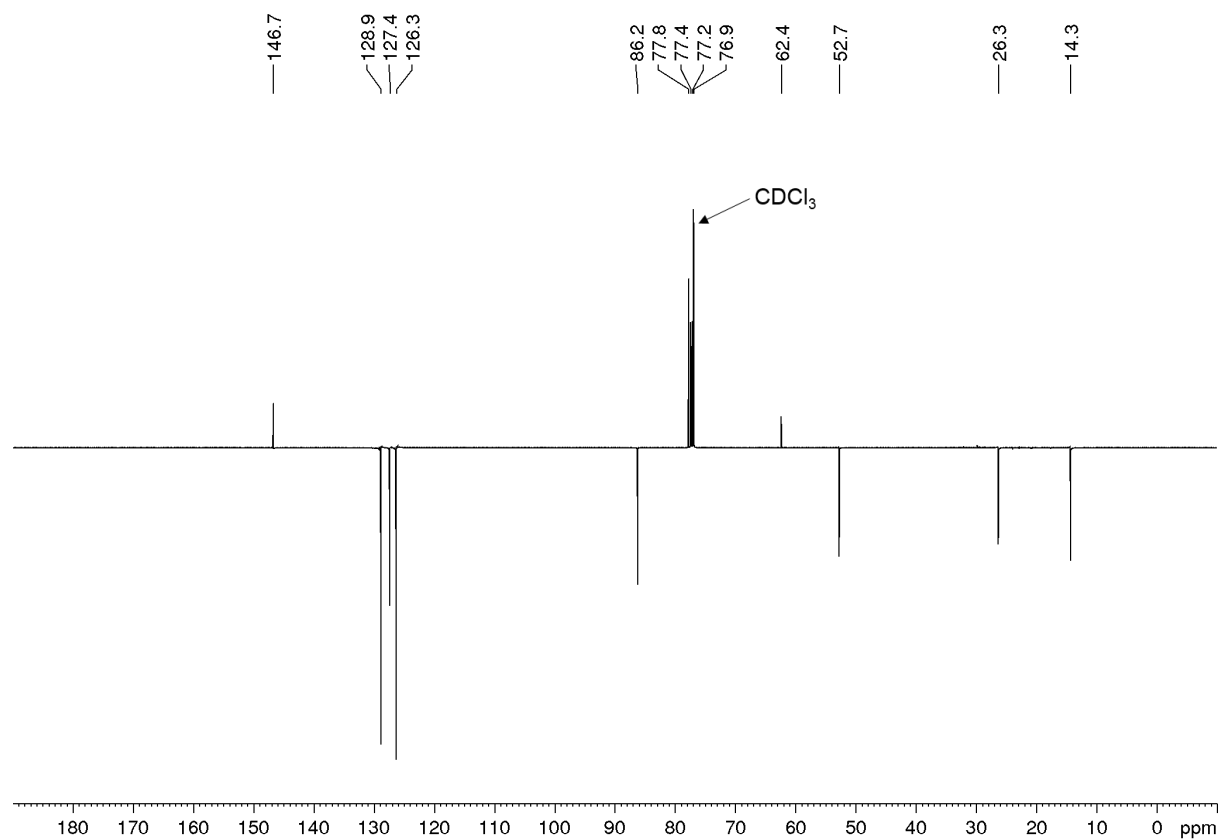

# Fmoc-D-AOx-NH<sub>2</sub> ((R)-10)

<sup>1</sup>H NMR (500 MHz, CDCl<sub>3</sub>)

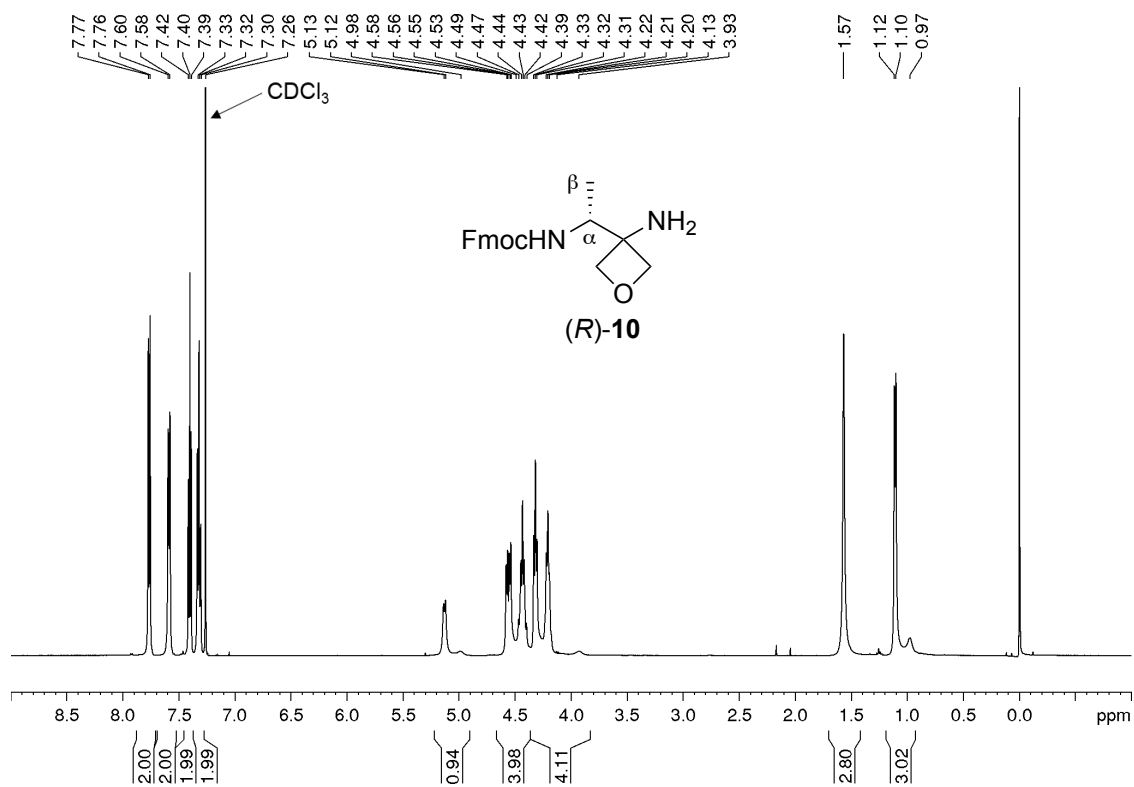

<sup>13</sup>C NMR (126 MHz, CDCl<sub>3</sub>)

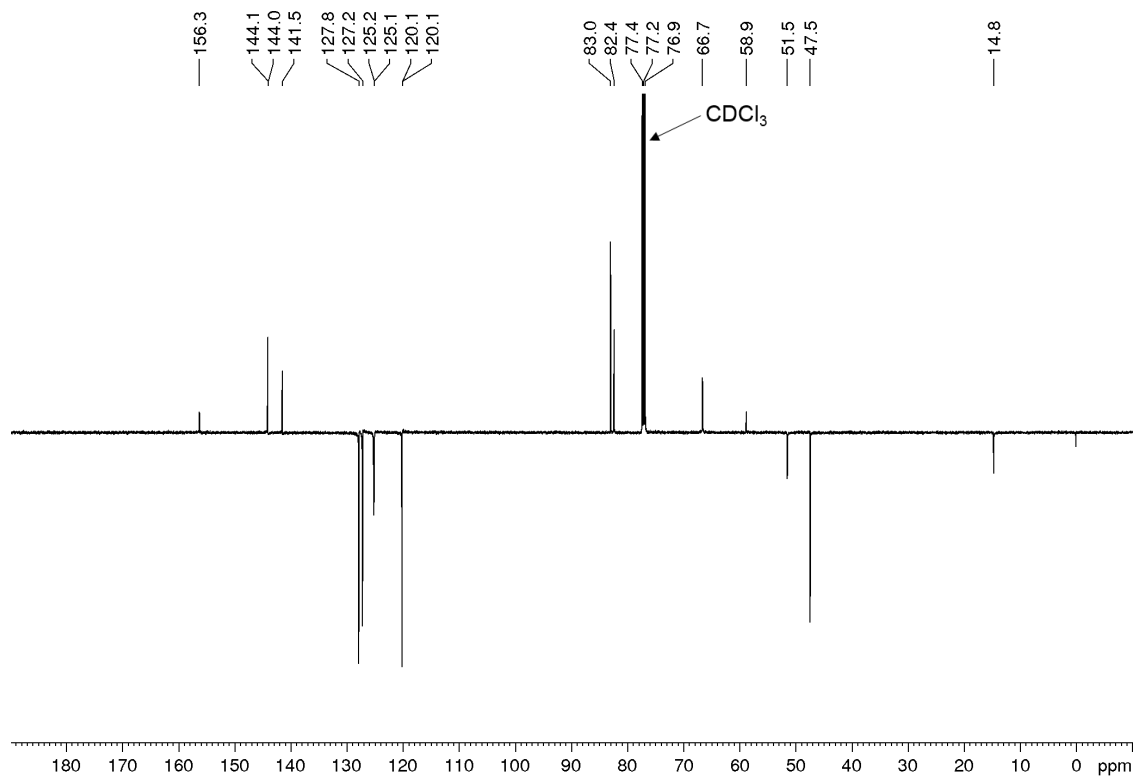

## 2-Phenylpropan-2-yl (*S*)-2-hydroxypropanoate ((*S*)-12)

$^1\text{H}$  NMR (500 MHz,  $\text{CDCl}_3$ )

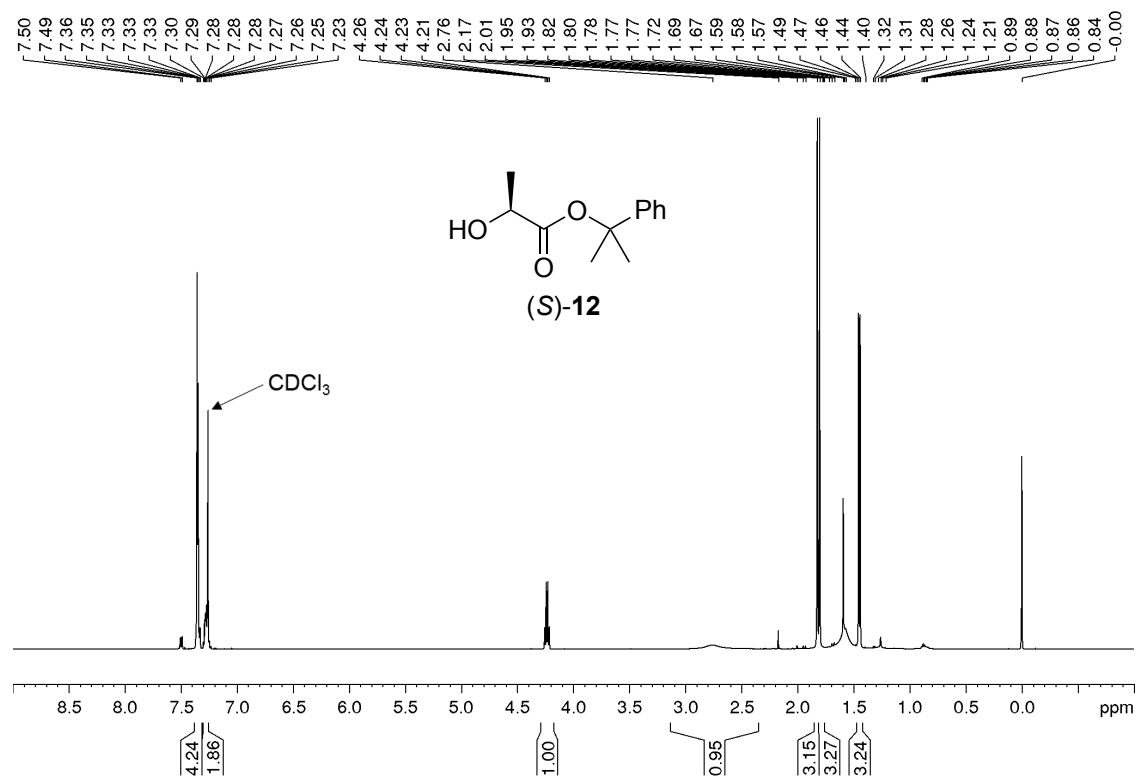

$^{13}\text{C}$  NMR (126 MHz,  $\text{CDCl}_3$ )

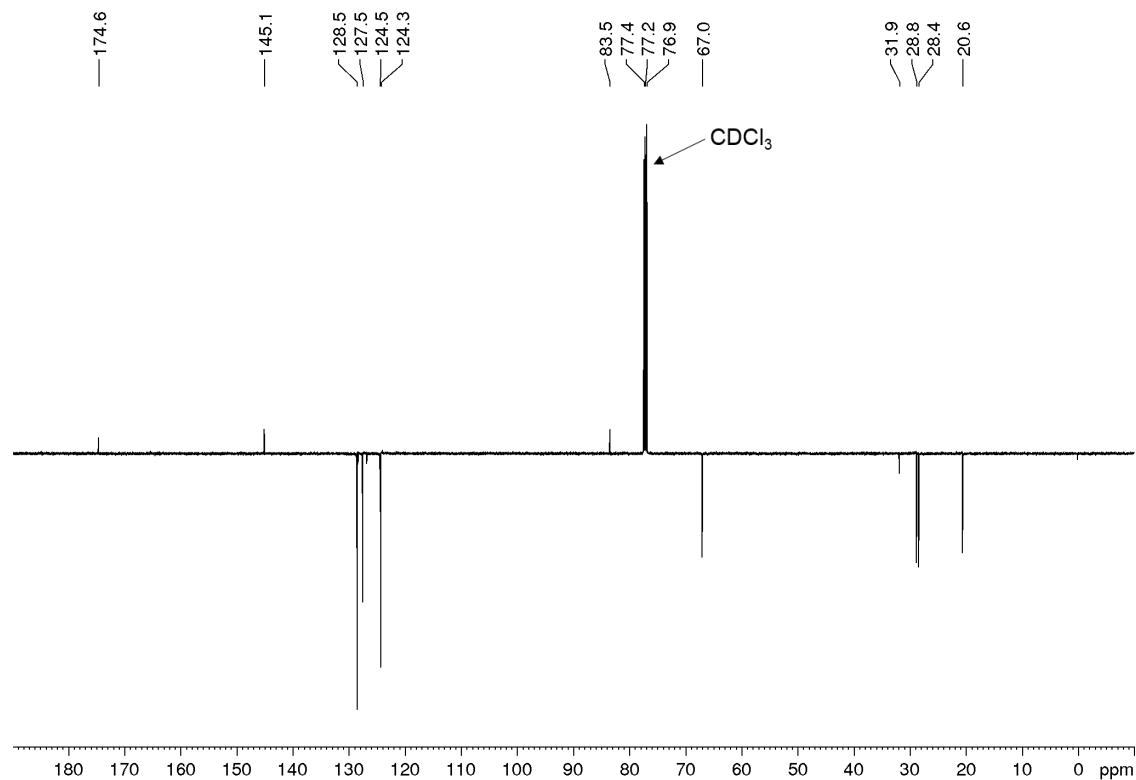

**(R)-1-Oxo-1-[(2-phenylpropan-2-yl)oxy]propan-2-yl 4-nitrobenzoate (27)**

**<sup>1</sup>H NMR (500 MHz, CDCl<sub>3</sub>)**

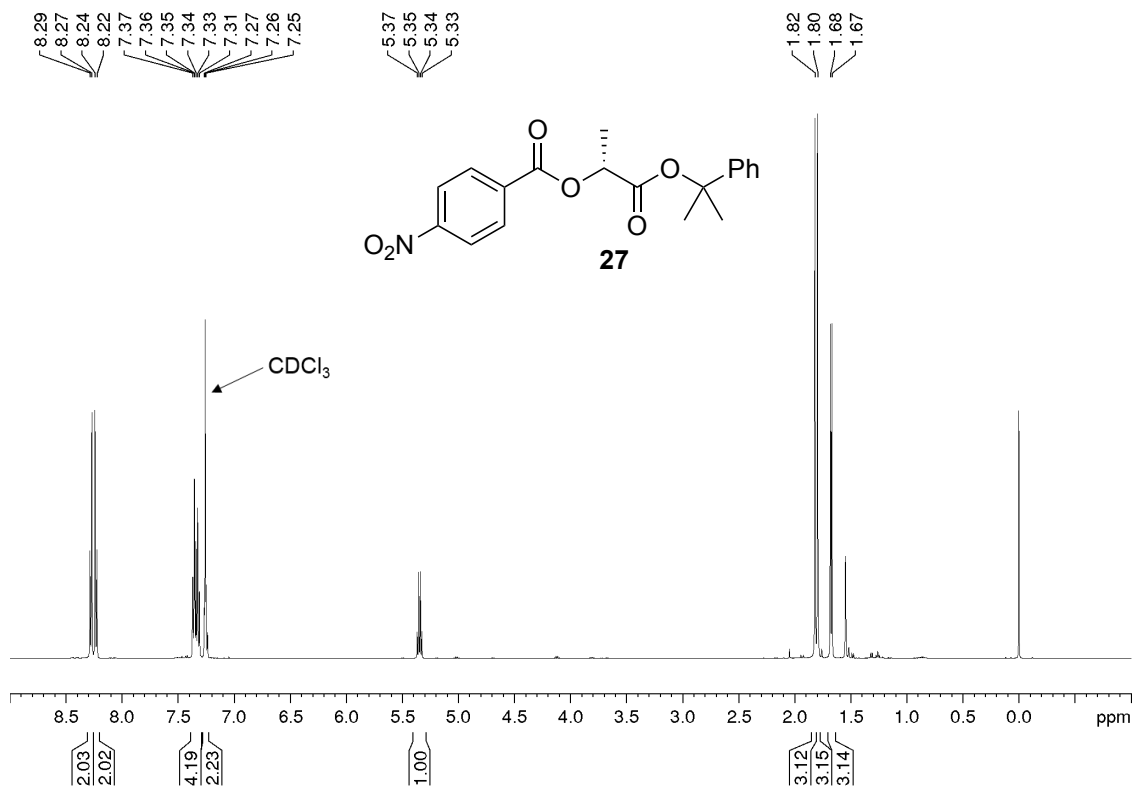

**<sup>13</sup>C NMR (126 MHz, CDCl<sub>3</sub>)**

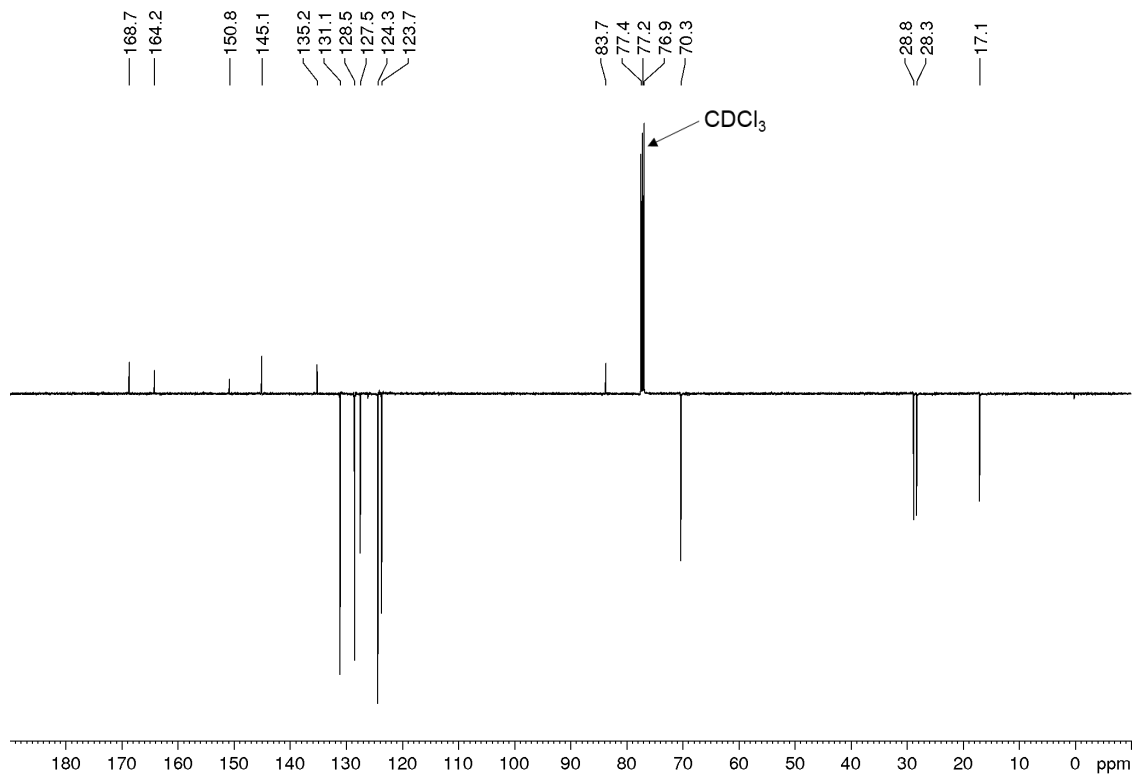

# Fmoc-D-AOx-Ala-OCumyl ((*R,S*)-14)

<sup>1</sup>H NMR (500 MHz, CDCl<sub>3</sub>)

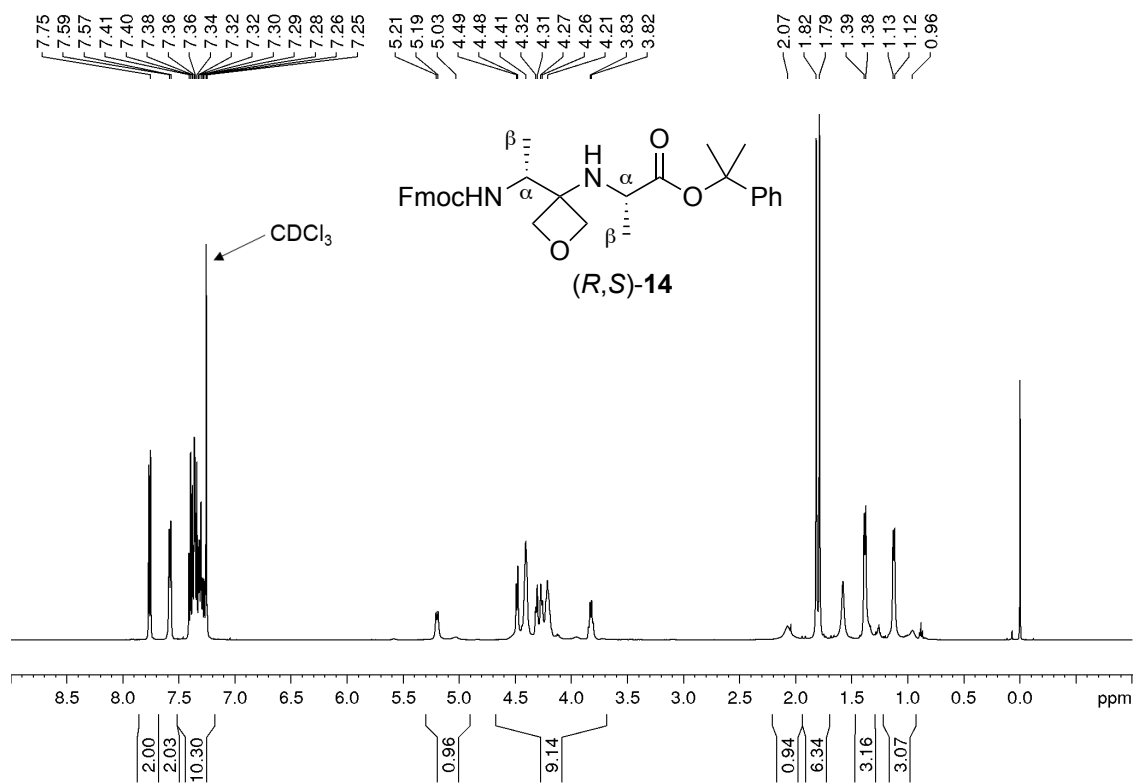

<sup>13</sup>C NMR (126 MHz, CDCl<sub>3</sub>)

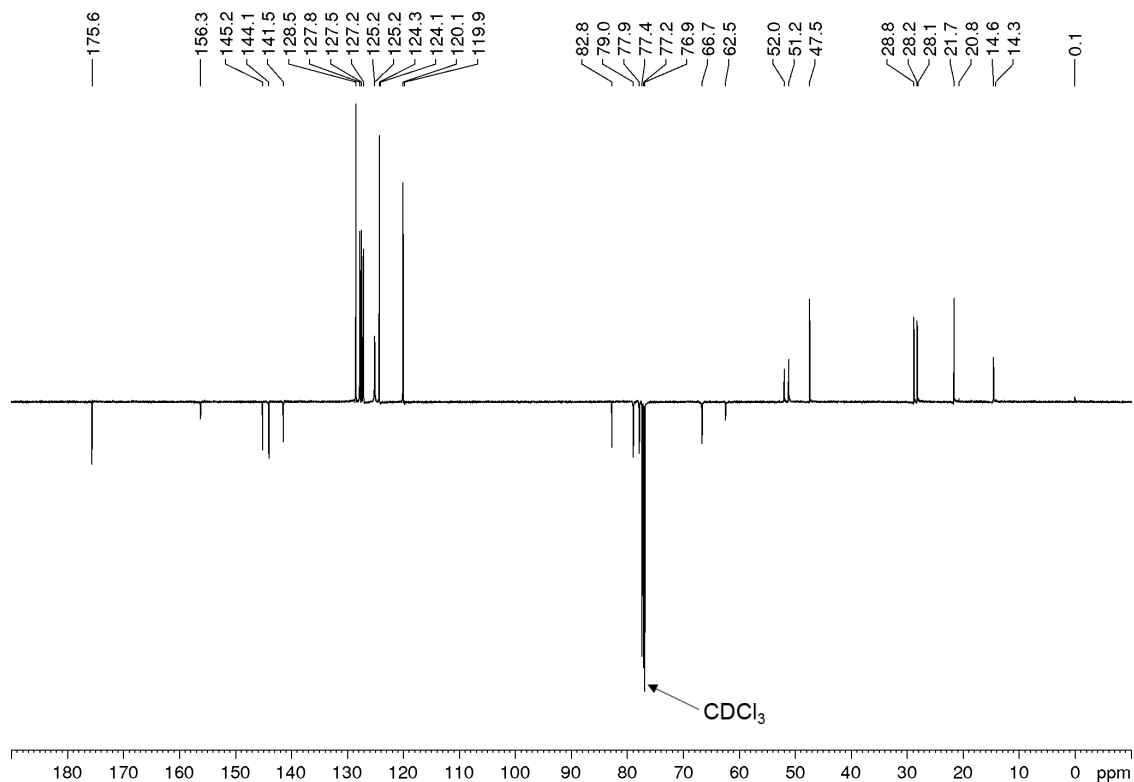



# Fmoc-L-AOx-Ala-OCumyl ((S,S)-14)

<sup>1</sup>H NMR (500 MHz, CDCl<sub>3</sub>)

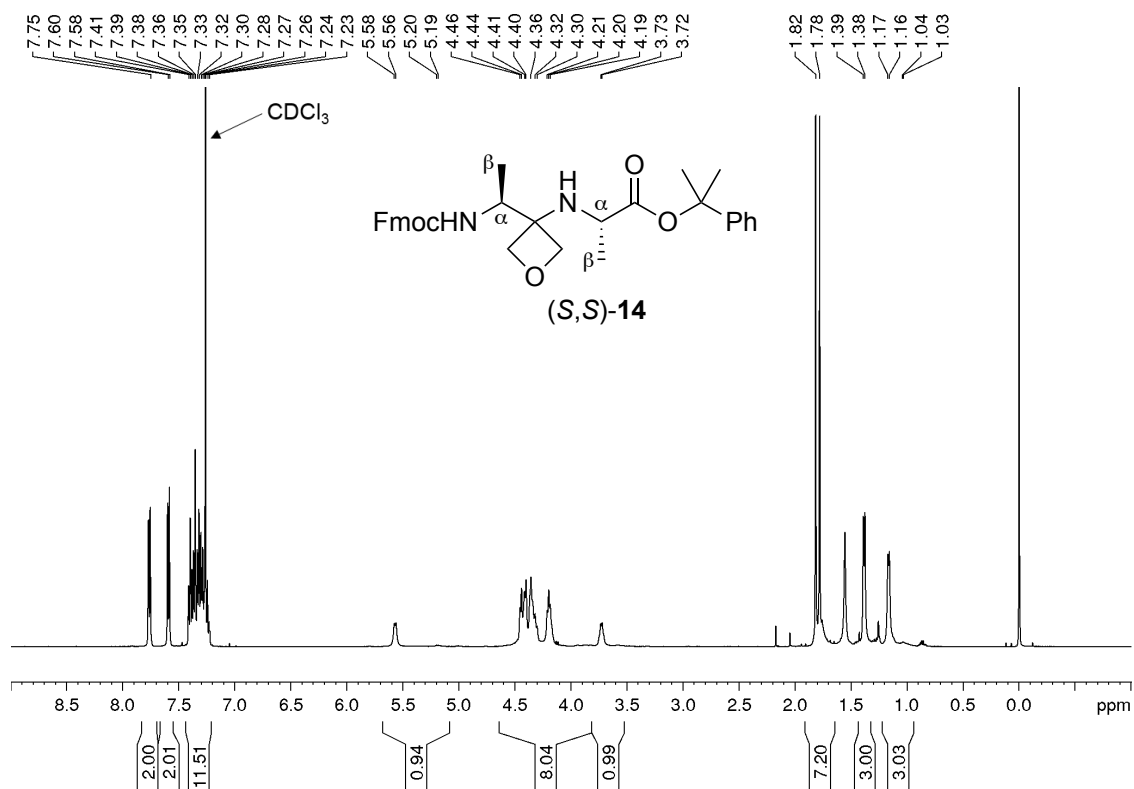

<sup>13</sup>C NMR (126 MHz, CDCl<sub>3</sub>)

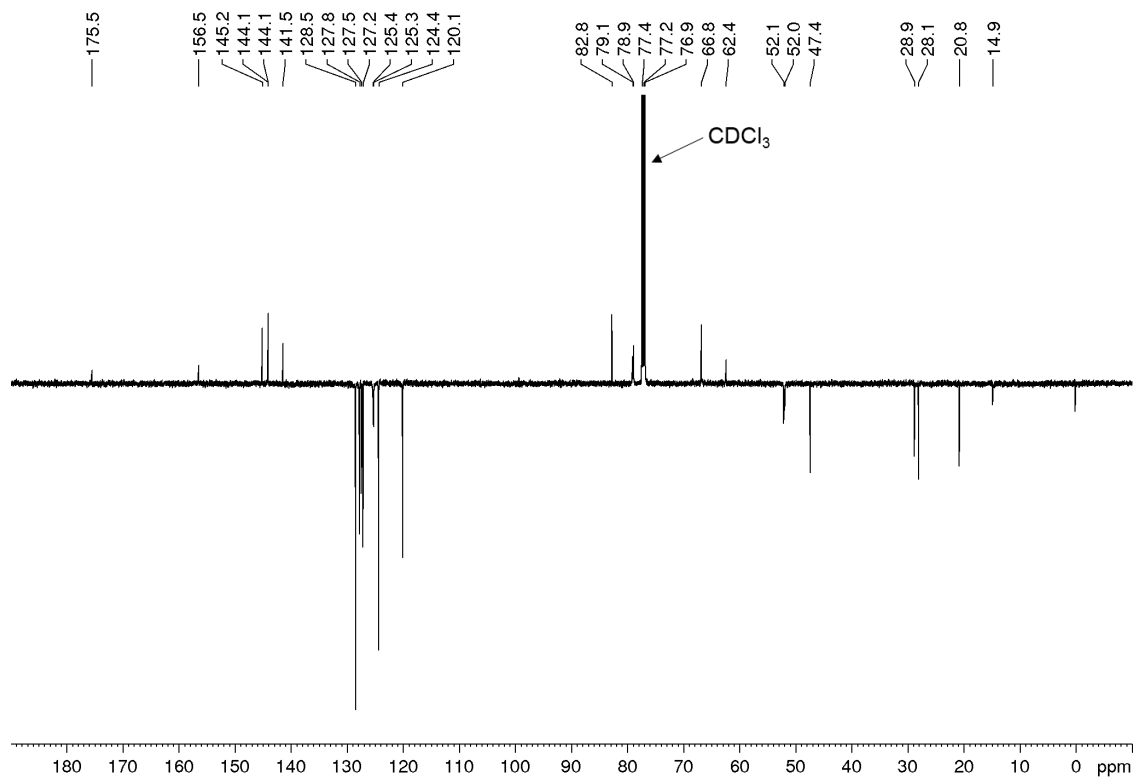

**(9H-Fluoren-9-yl)methyl (R)-(1-(3-(4-bromobenzamido)oxetan-3-yl)ethyl)carbamate (11)**

<sup>1</sup>H NMR (500 MHz, CDCl<sub>3</sub>)

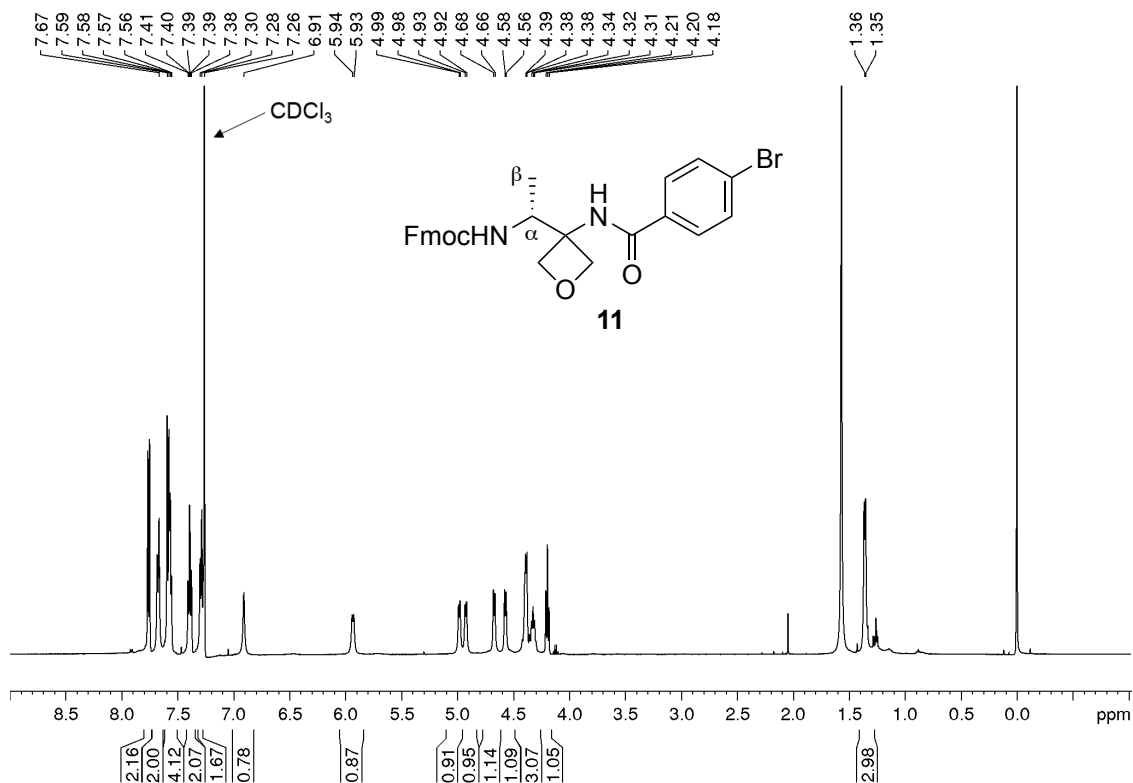

<sup>13</sup>C NMR (126 MHz, CDCl<sub>3</sub>)

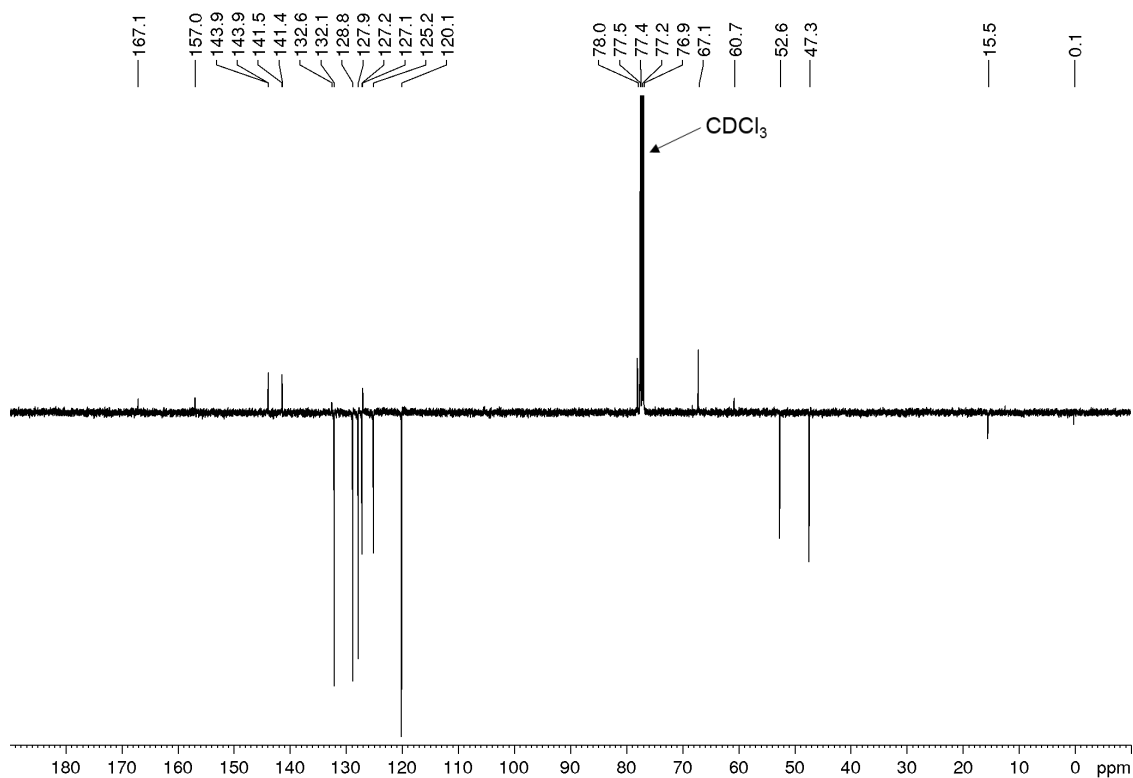

# Fmoc-Glu(*t*Bu)-OCumyl (**1a**)

<sup>1</sup>H NMR (400 MHz, CDCl<sub>3</sub>)

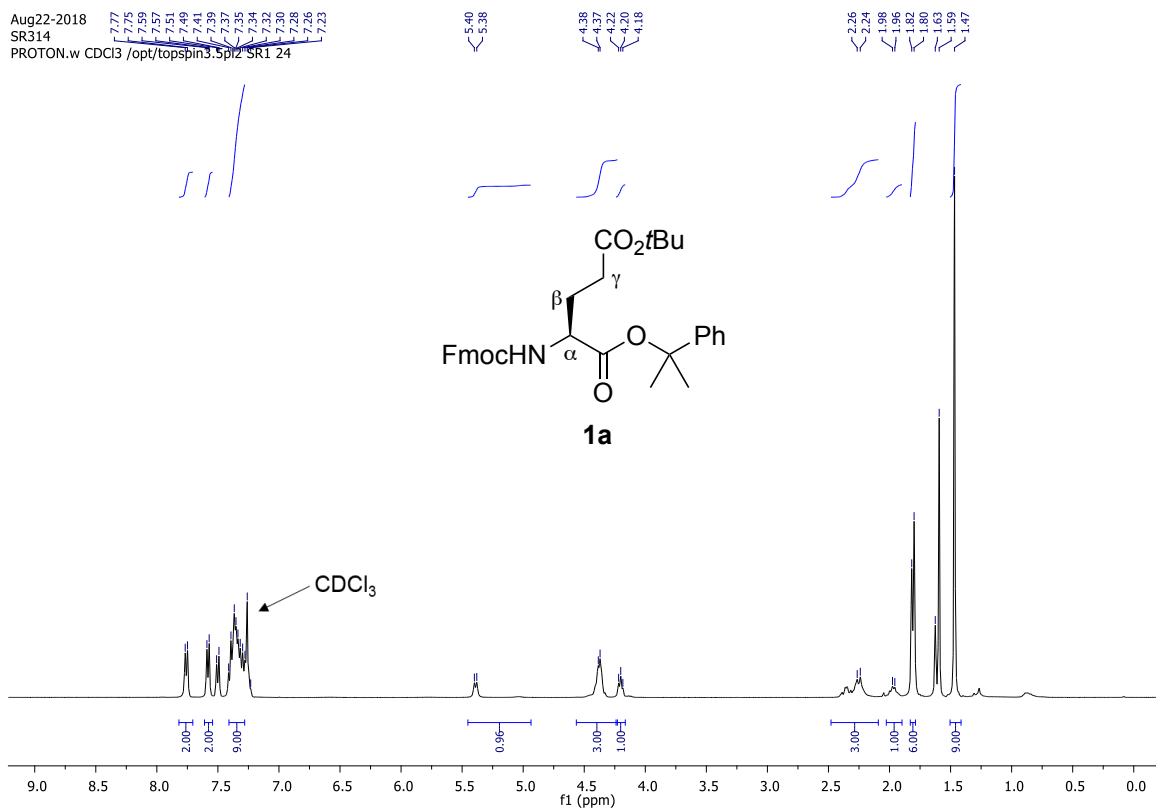

<sup>13</sup>C NMR (101 MHz, CDCl<sub>3</sub>)

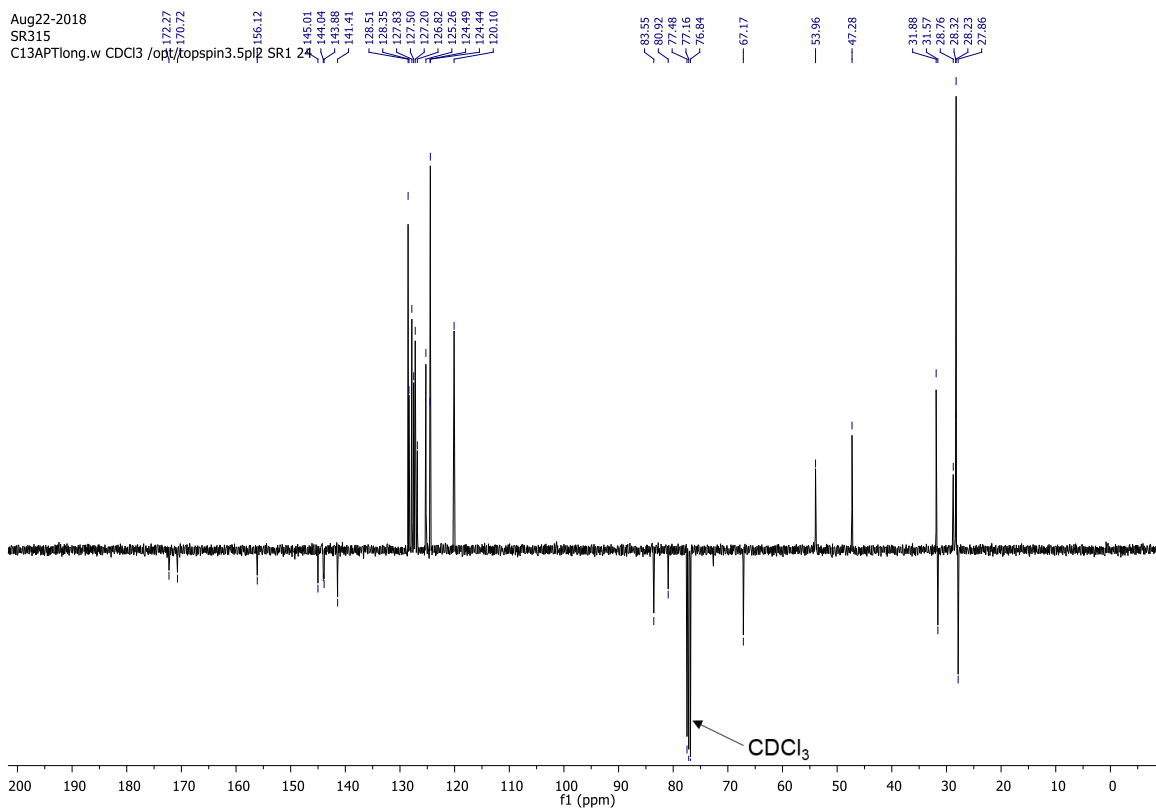

# O<sub>2</sub>N-GOx-Glu(*t*Bu)-OCumyl (2a)

<sup>1</sup>H NMR (400 MHz, CDCl<sub>3</sub>)

Sep07-2018  
SR323  
PROTON.w CDCl3 /opt/topspin3.5pl2 SR1 24

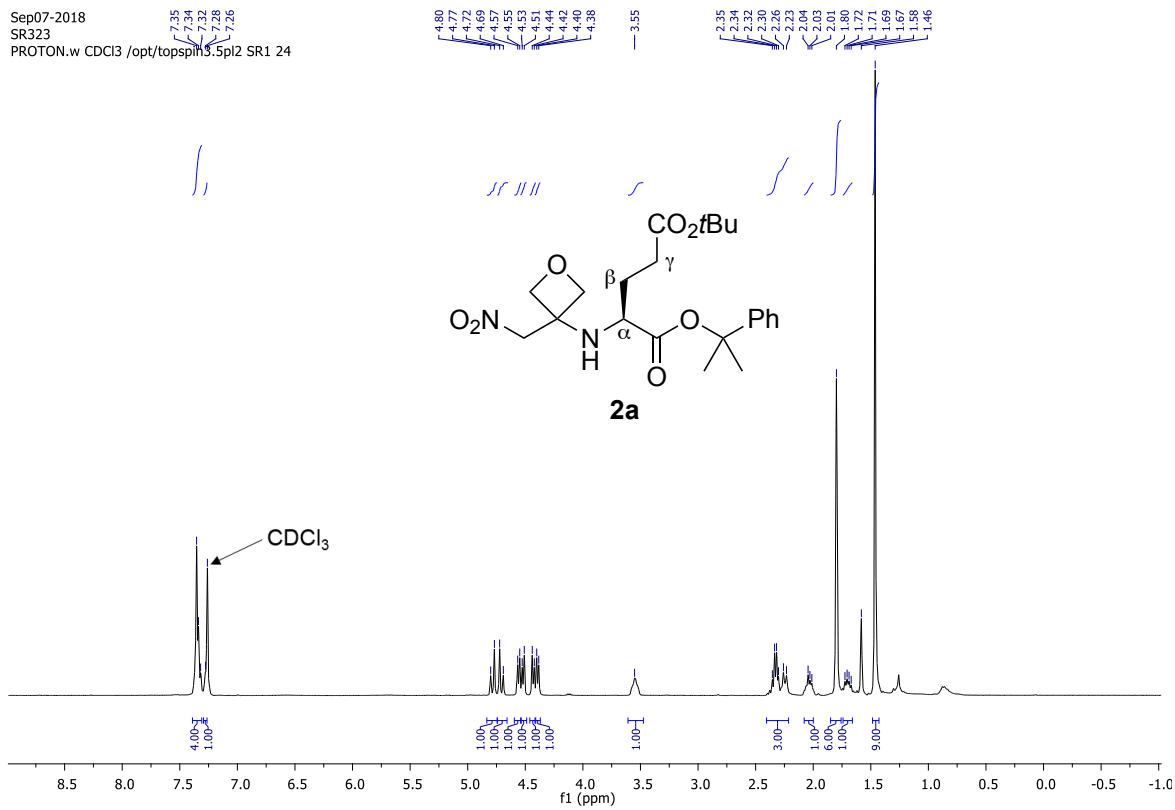

<sup>13</sup>C NMR (101 MHz, CDCl<sub>3</sub>)

Sep07-2018  
SR323  
C13APTlong.w CDCl3 /opt/topspin3.5pl2 SR1 21

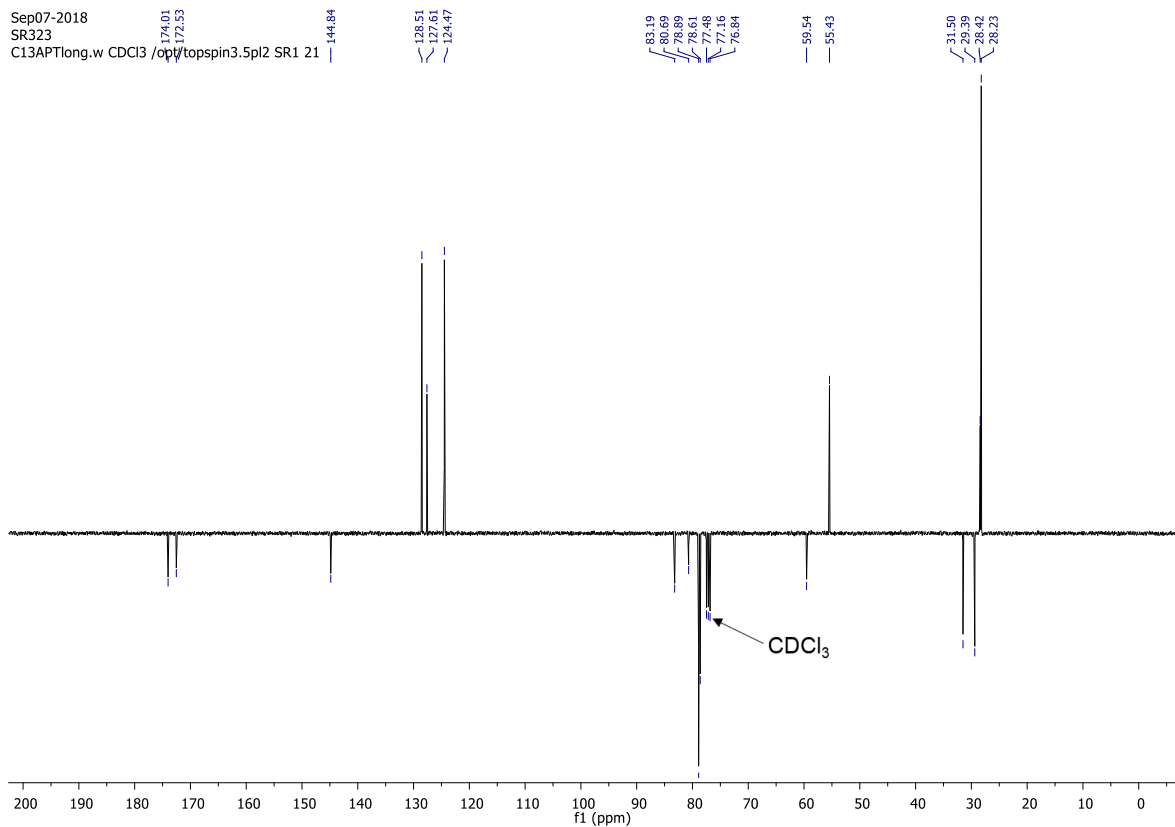

# Fmoc-GOx-Glu(*t*Bu)-OCumyl (3a)

<sup>1</sup>H NMR (400 MHz, CDCl<sub>3</sub>)

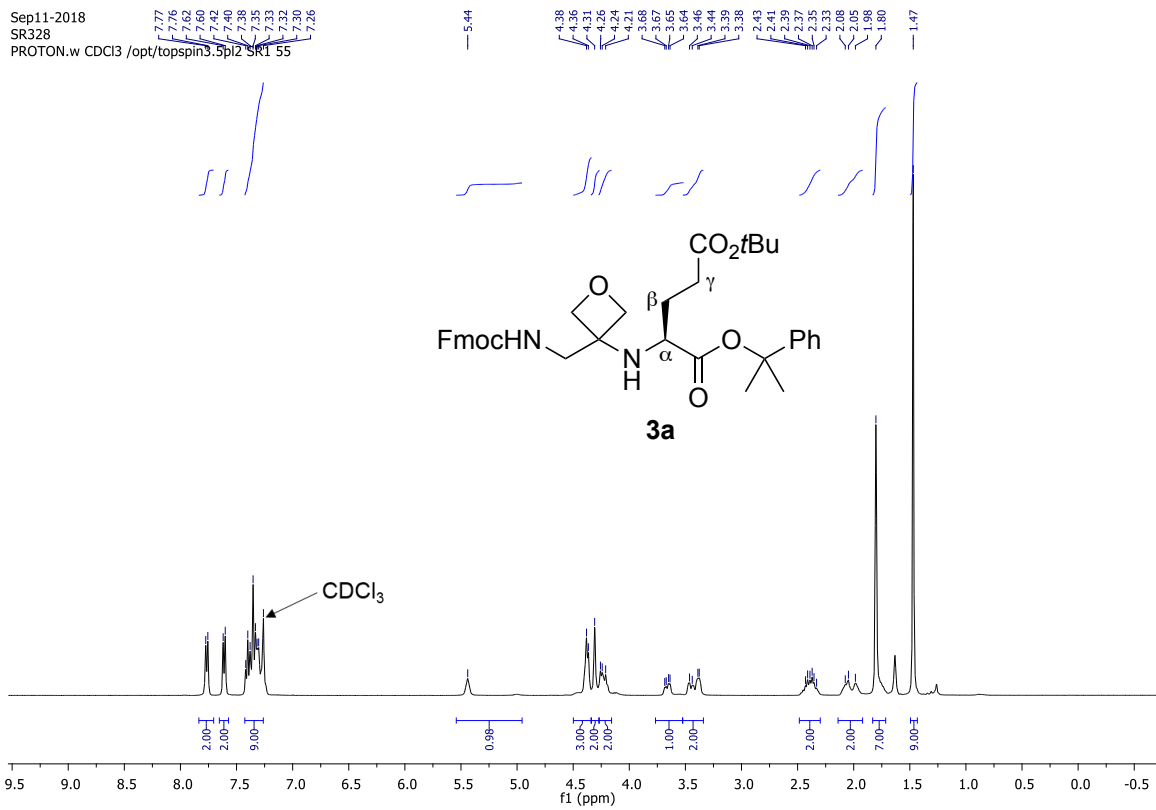

<sup>13</sup>C NMR (101 MHz, CDCl<sub>3</sub>)

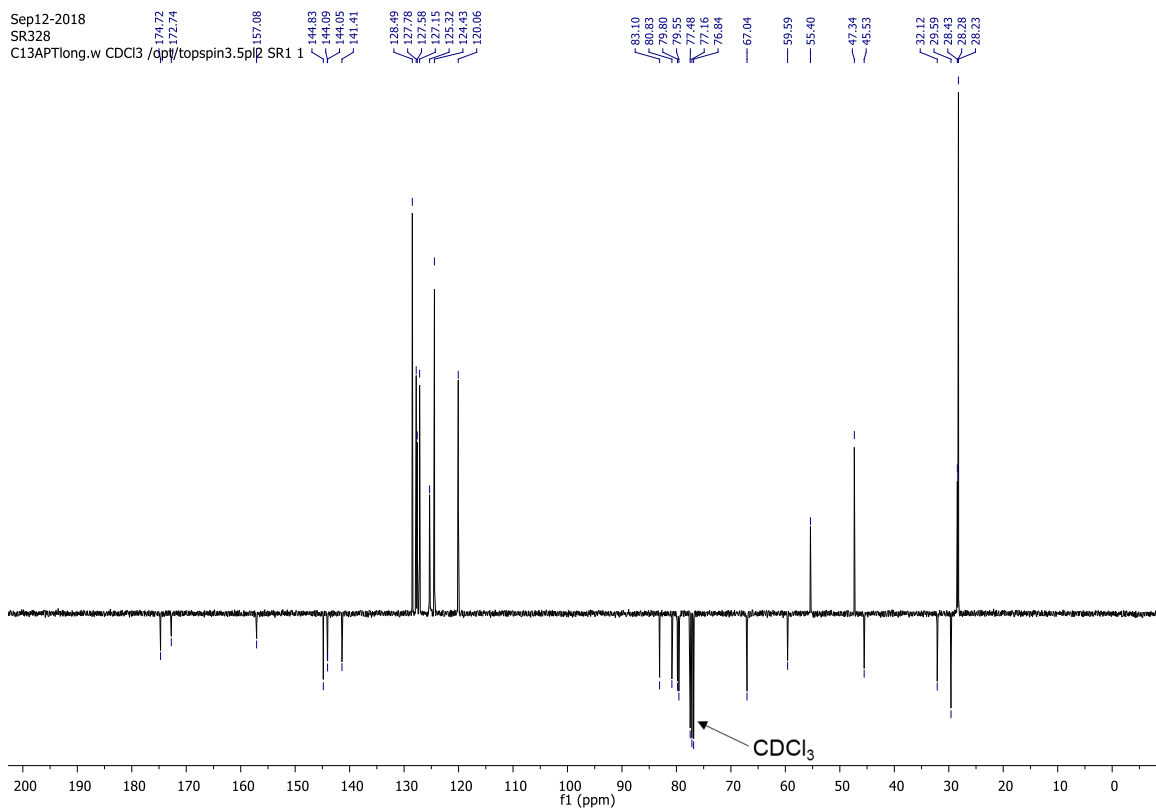

# Fmoc-Ile-OCumyl (1b)

<sup>1</sup>H NMR (400 MHz, CDCl<sub>3</sub>)

Aug22-2018  
SR315  
PROTON.w CDCl3 /opt/topspin3.5p2 SR1 23

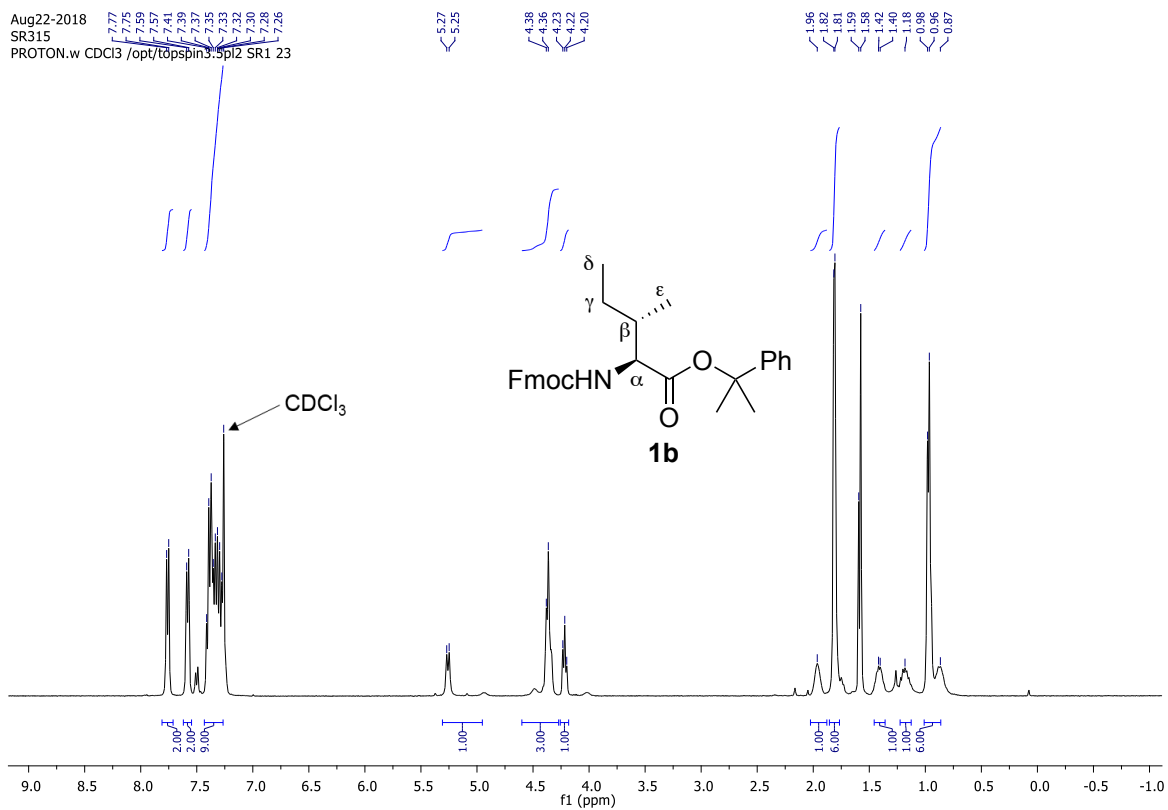

<sup>13</sup>C NMR (101 MHz, CDCl<sub>3</sub>)

Aug22-2018  
SR314  
C13APTlong.w CDCl3 /opt/topspin3.5p2 SR1 23

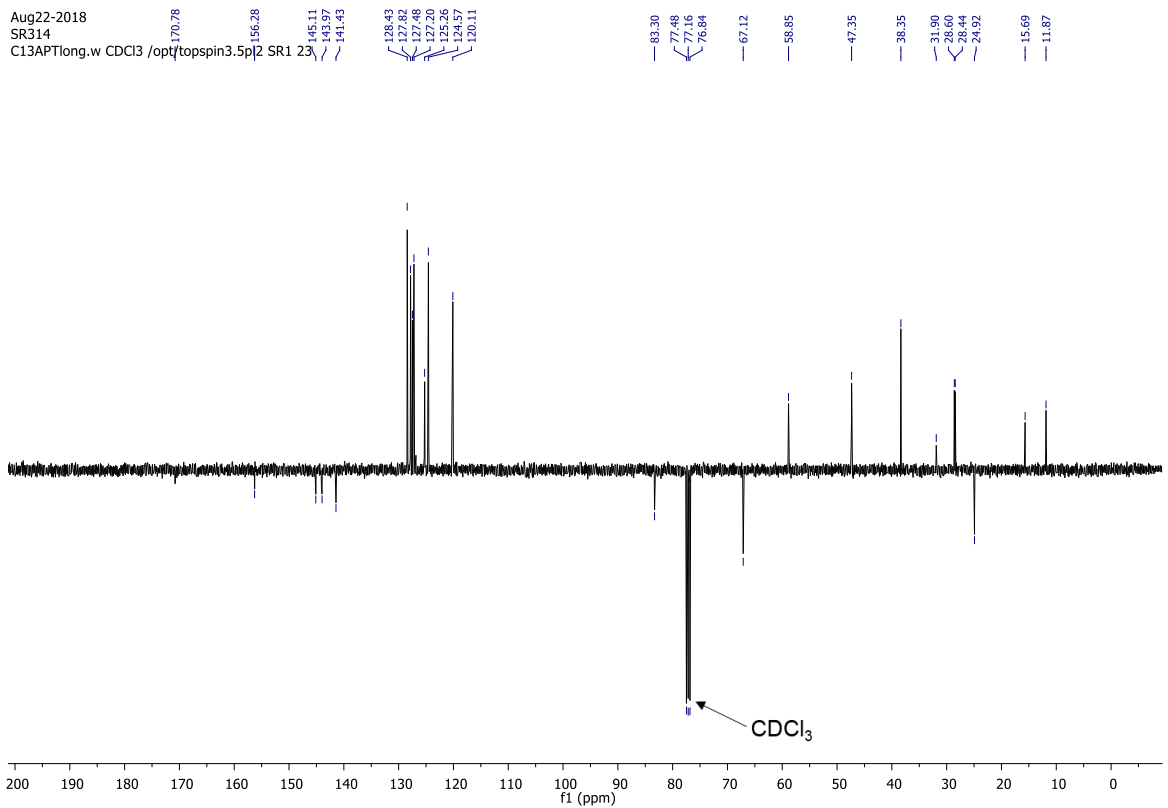

# NO<sub>2</sub>-GO<sub>x</sub>-Ile-OCumyl (2b)

<sup>1</sup>H NMR (400 MHz, CDCl<sub>3</sub>)

Sep11-2018  
SR328  
PROTON.w CDCl3 /opt/topspin3.5pl2 SR1 4

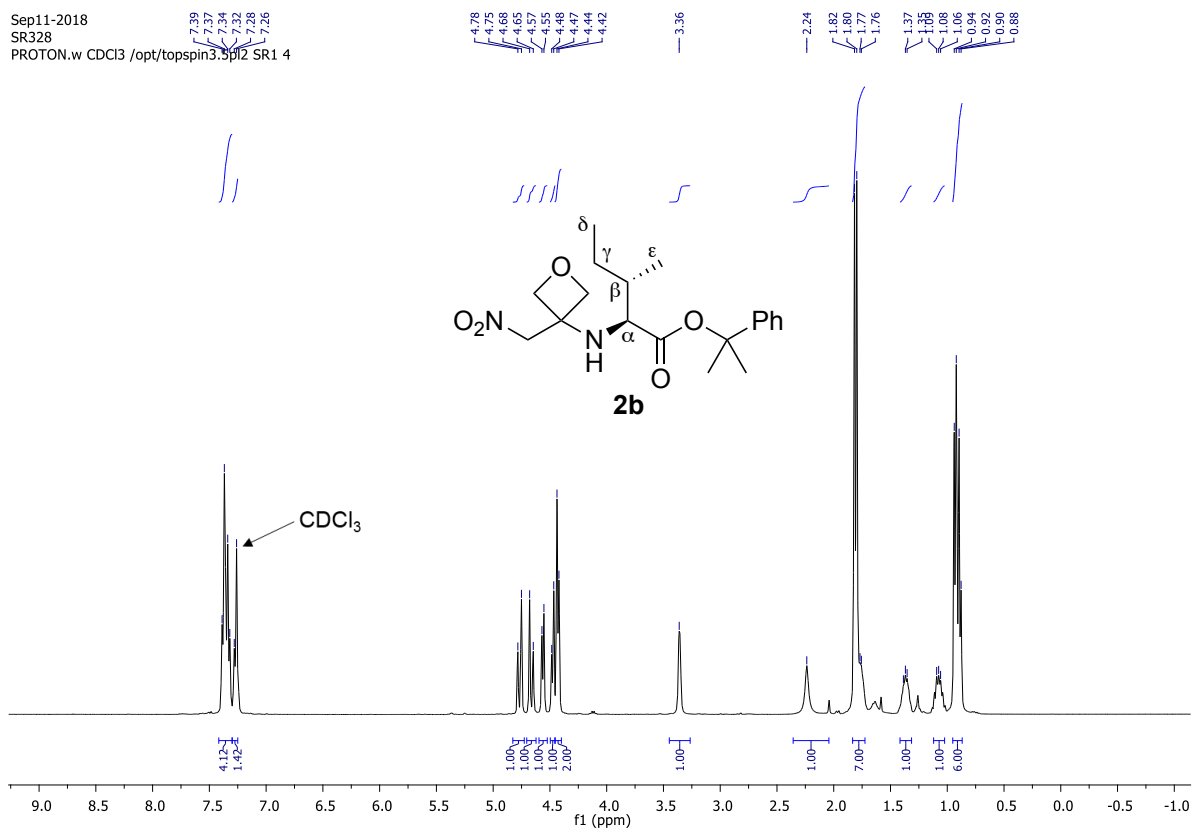

<sup>13</sup>C NMR (101 MHz, CDCl<sub>3</sub>)

Sep11-2018  
SR328  
C13APTlong.w CDCl3 /opt/topspin3.5pl2 SR1 4

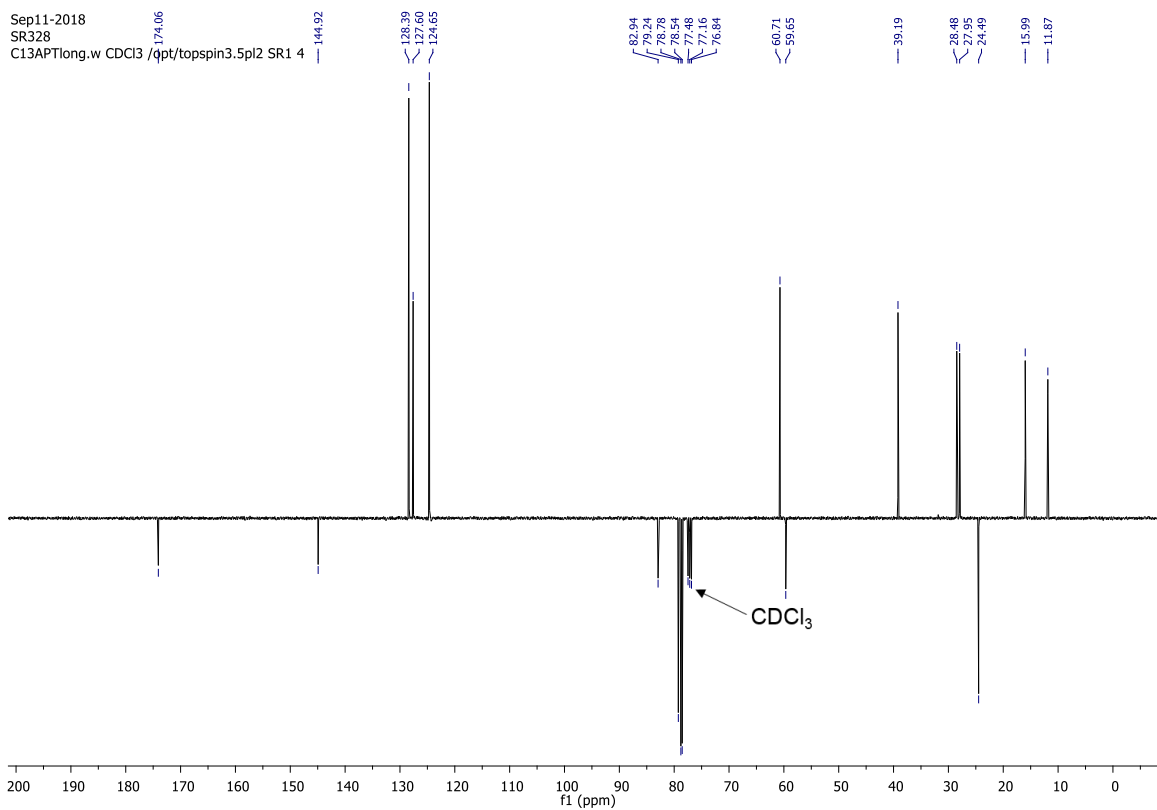

# Fmoc-GOx-Ile-OCumyl (3b)

<sup>1</sup>H NMR (400 MHz, CDCl<sub>3</sub>)

Sep13-2018  
SR330  
PROTON.w CDCl3 /opt/topspin3.5p12 SR1 3

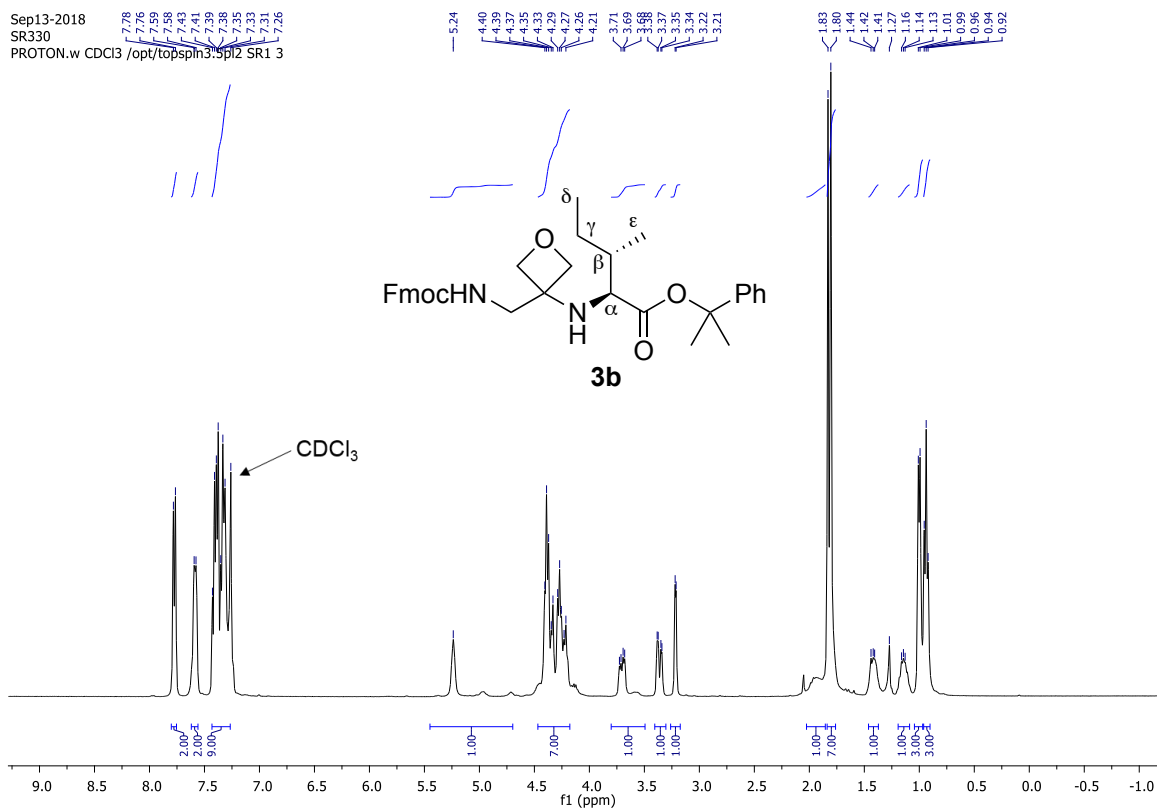

<sup>13</sup>C NMR (101 MHz, CDCl<sub>3</sub>)

Sep13-2018  
SR330  
C13APTlong.w CDCl3 /opt/topspin3.5p12 SR1 3

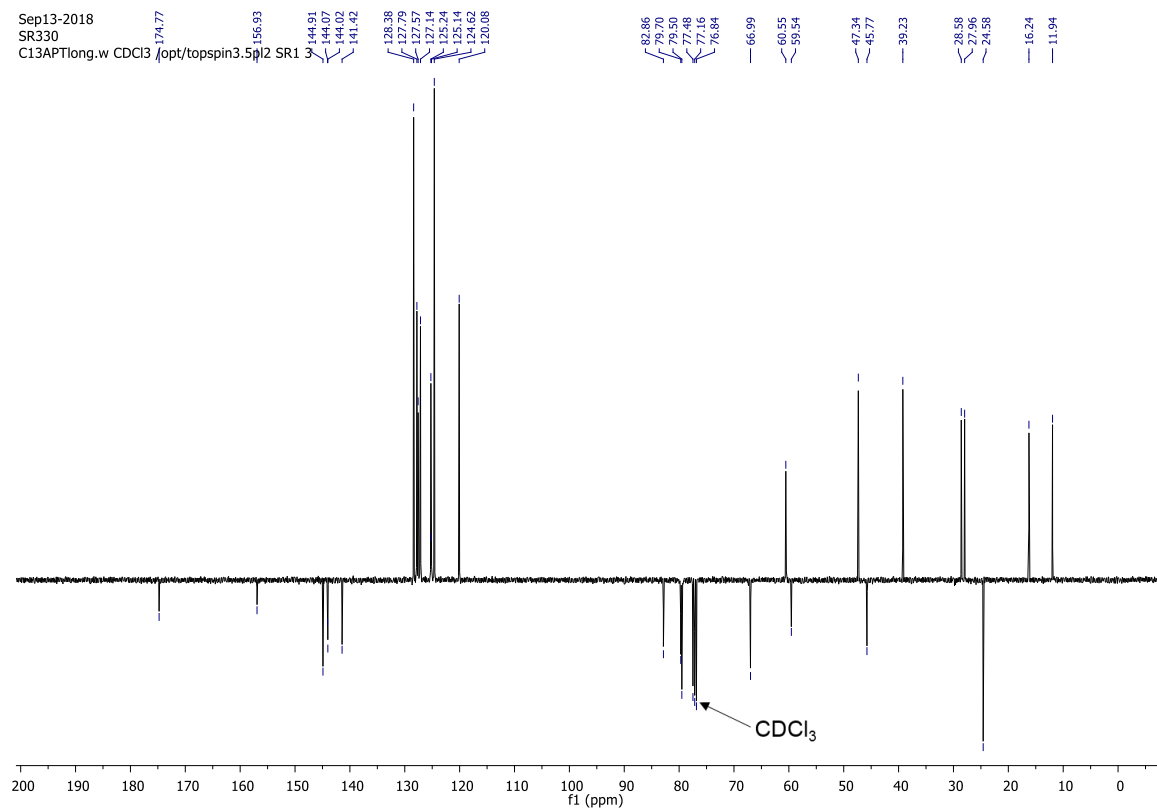



# Fmoc-Leu-OCumyl (1c)

<sup>1</sup>H NMR (400 MHz, CDCl<sub>3</sub>)

Sep18-2018  
SR331  
PROTON.w CDCl3 /opt/topspin3.5pl2 SR1 8

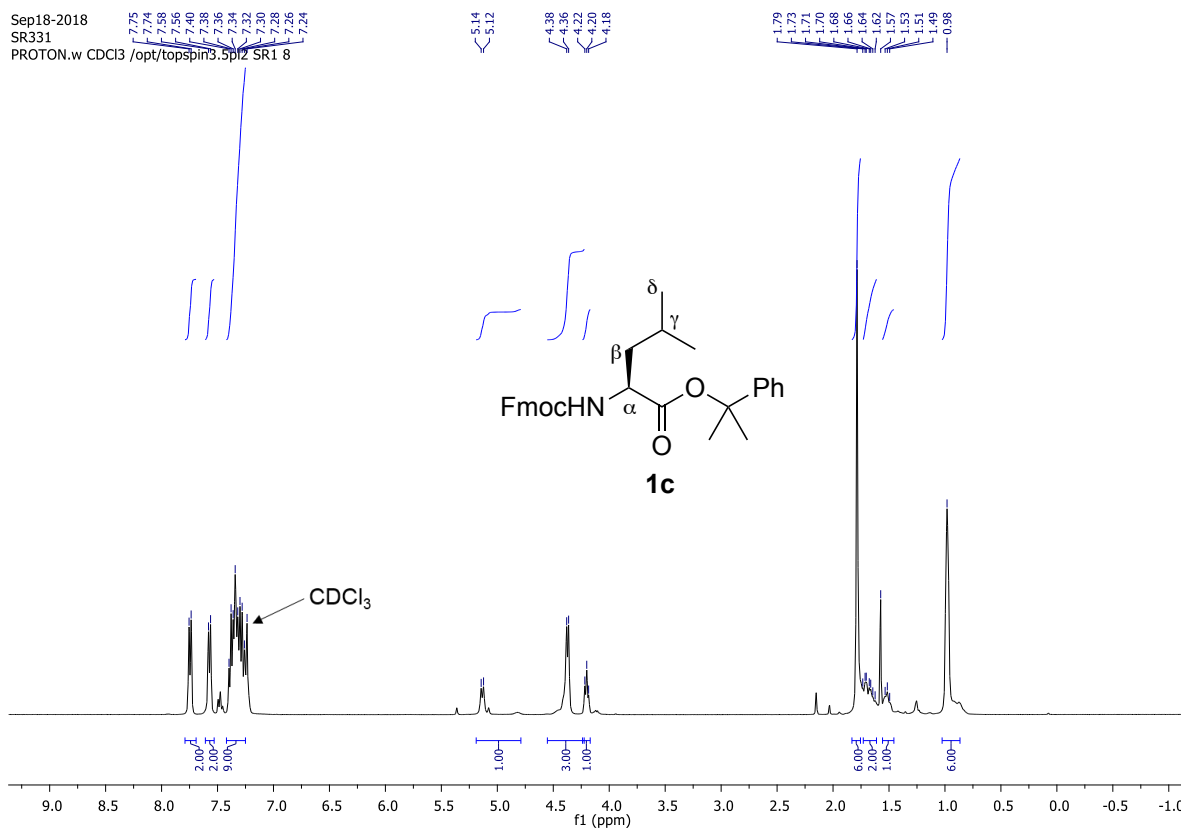

<sup>13</sup>C NMR (101 MHz, CDCl<sub>3</sub>)

Sep18-2018  
SR331  
C13APT.w CDCl3 /opt/topspin3.5pl2 SR1 8

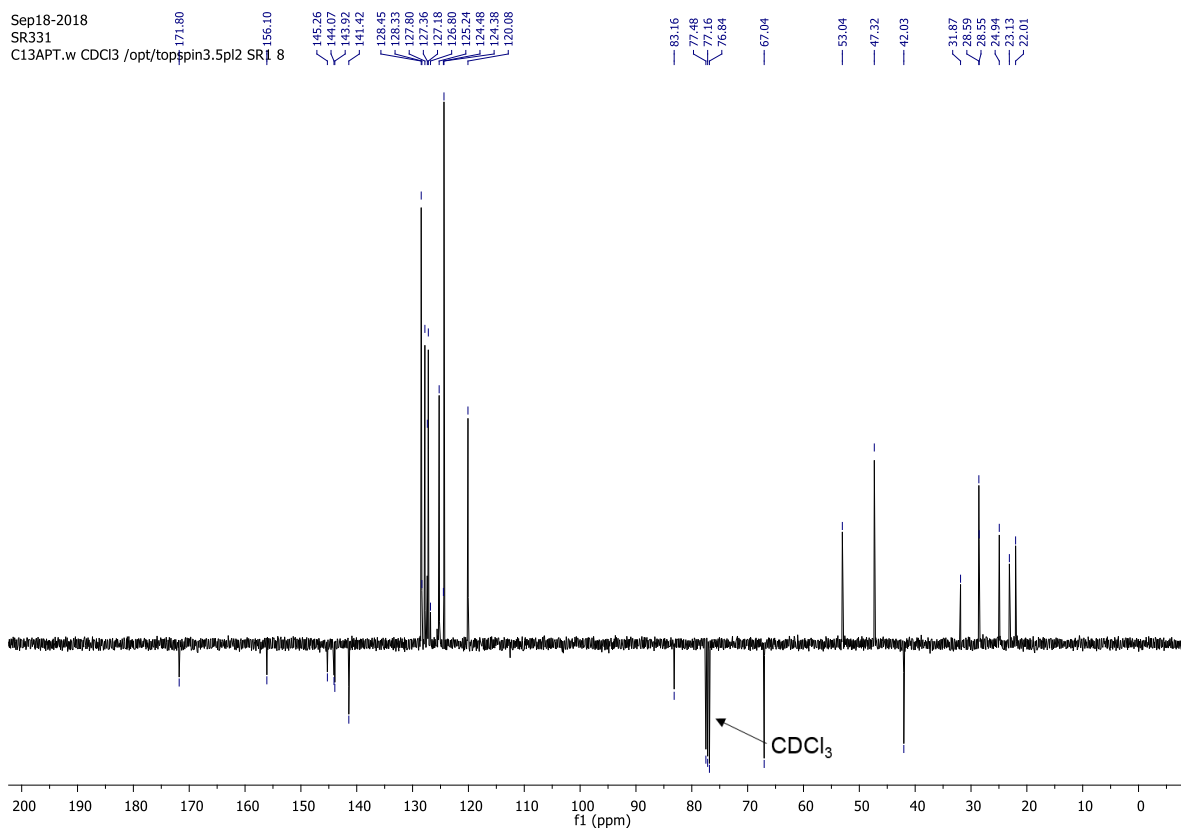

# NO<sub>2</sub>-GOx-Leu-OCumyl (2c)

<sup>1</sup>H NMR (400 MHz, CDCl<sub>3</sub>)

Sep19-2018  
SR334  
PROTON.w CDCl3 /opt/topspin3.5pl2 SR1 37

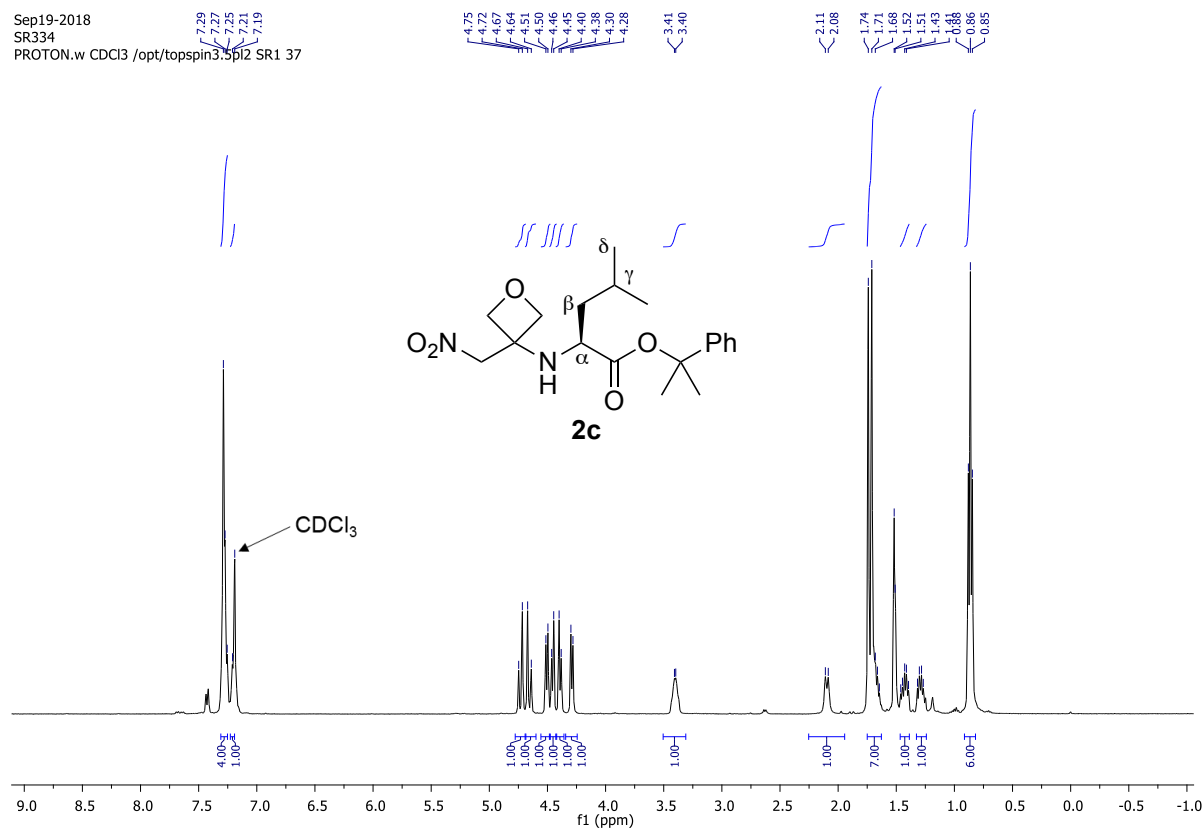

<sup>13</sup>C NMR (CDCl<sub>3</sub>, 101 MHz)

Sep19-2018  
SR334  
C13APT.w CDCl3 /opt/topspin3.5pl2 SR1 34

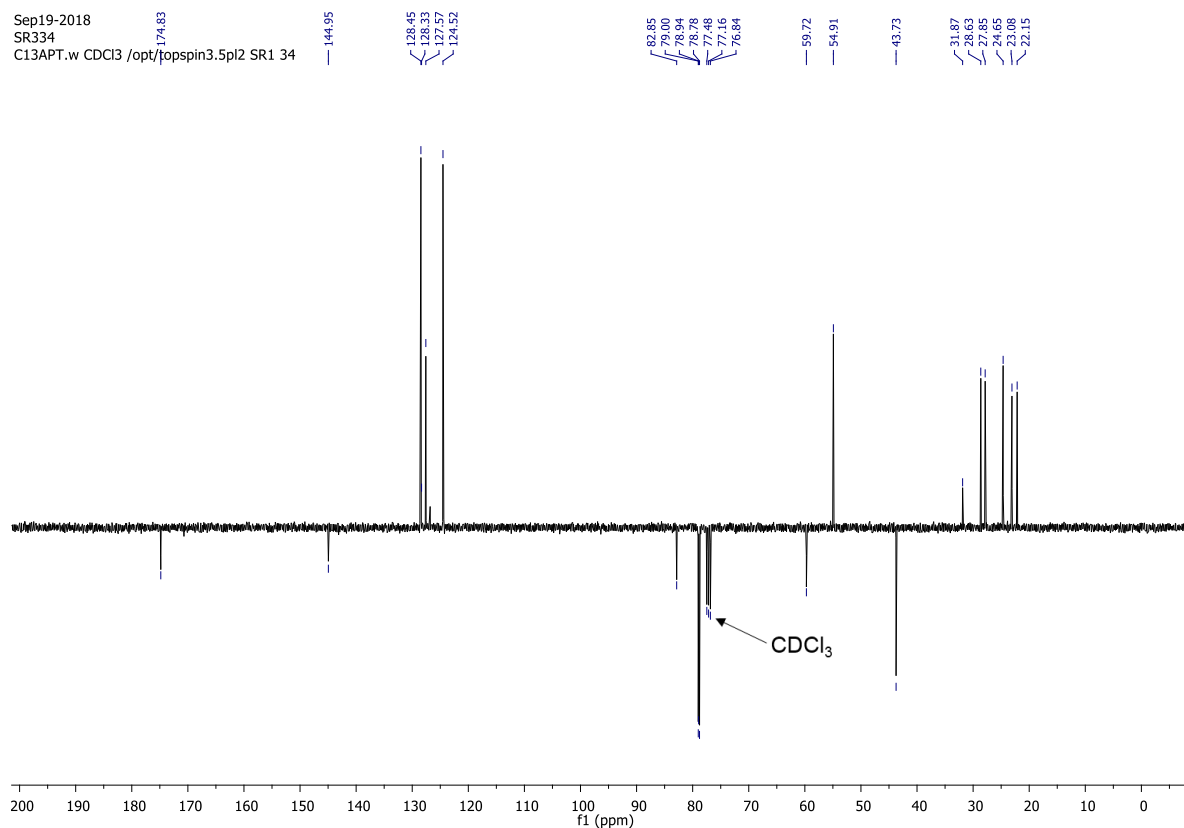

# Fmoc-GOx-Leu-OCumyl (3c)

## <sup>1</sup>H NMR (400 MHz, CDCl<sub>3</sub>)

Sep20-2018  
SR337  
PROTON.w CDCl3 /opt/topspin3.5pl2 SR1 24

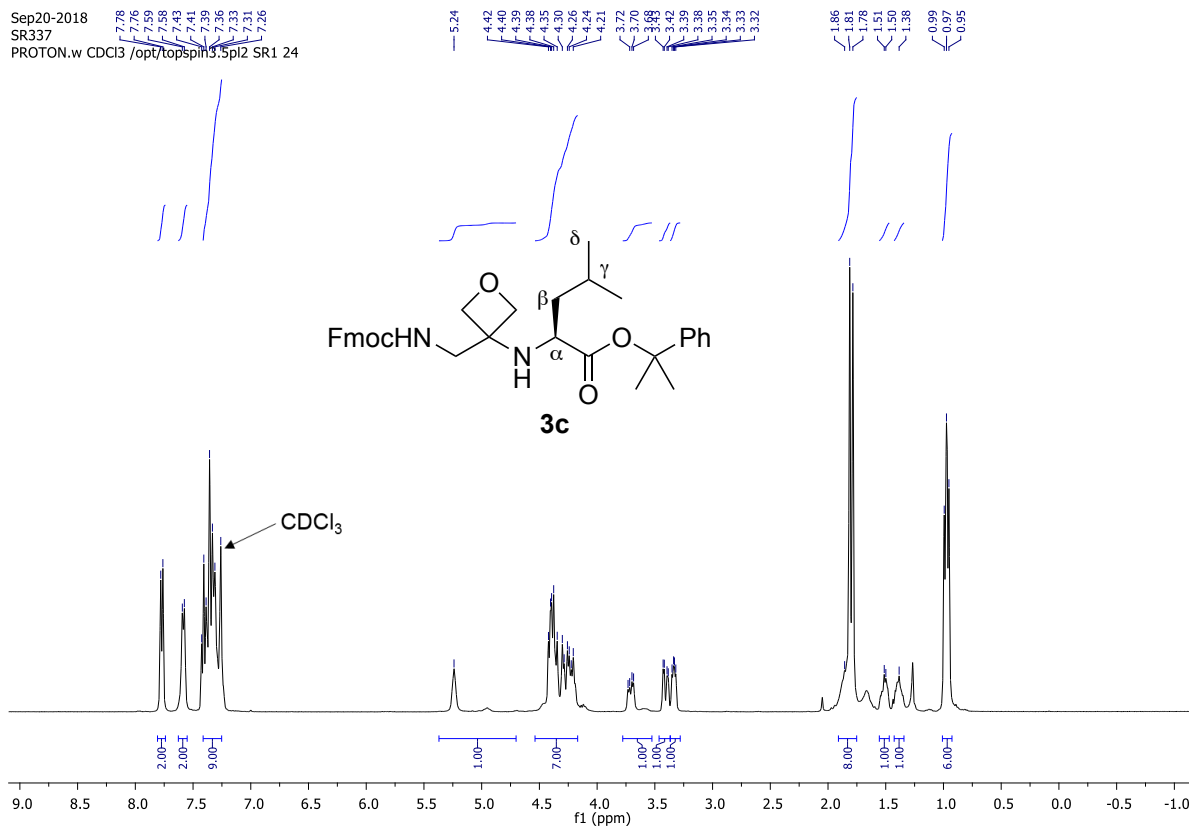

## <sup>13</sup>C NMR (101 MHz, CDCl<sub>3</sub>)

Sep20-2018  
SR337  
C13APTlong.w CDCl3 /opt/topspin3.5pl2 SR1 24

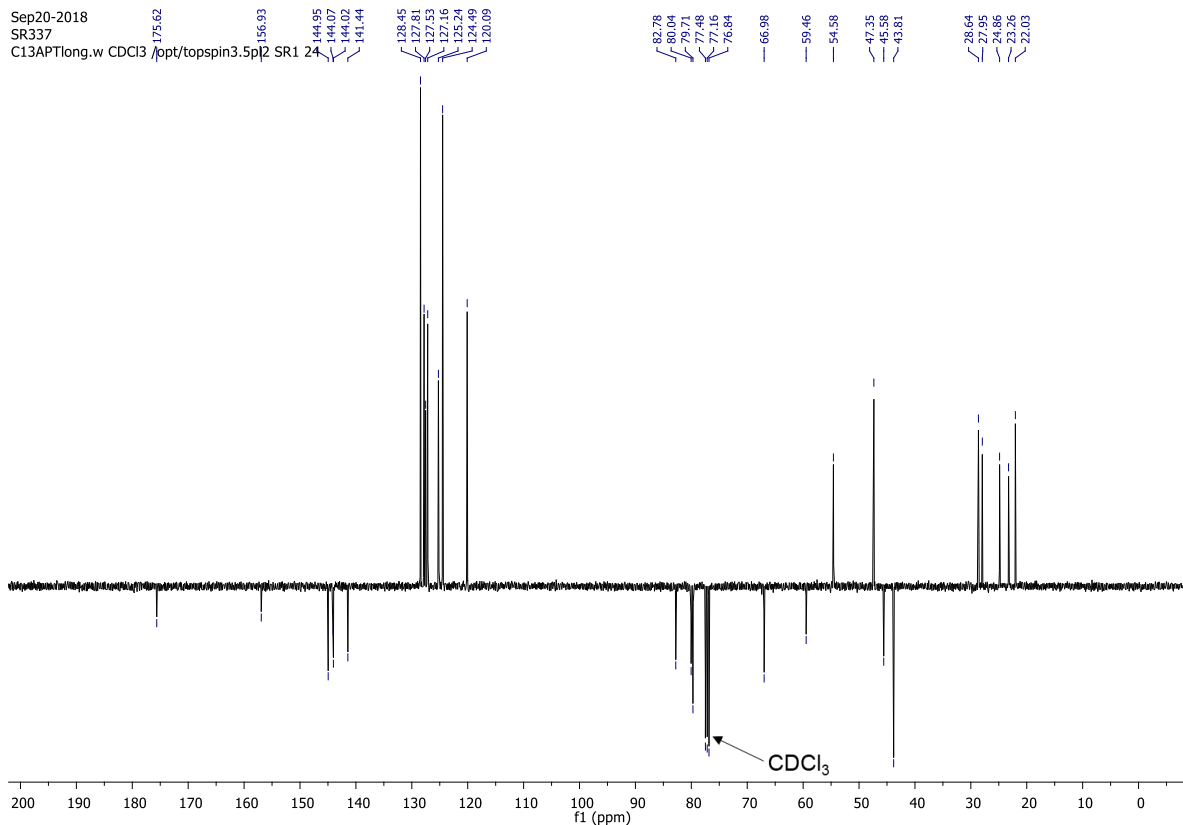

# Fmoc-Asn(Trt)-OCumyl (1d)

<sup>1</sup>H NMR (300 MHz, CDCl<sub>3</sub>)

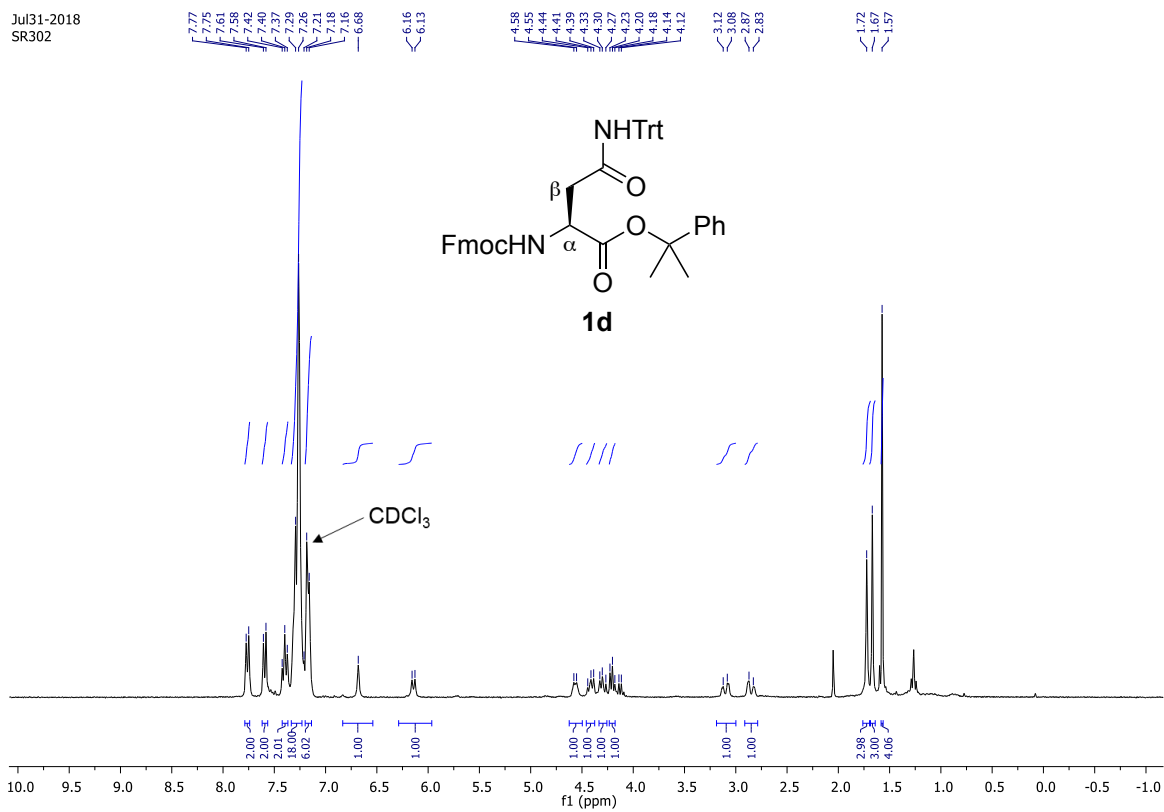

<sup>13</sup>C NMR (126 MHz, CDCl<sub>3</sub>)

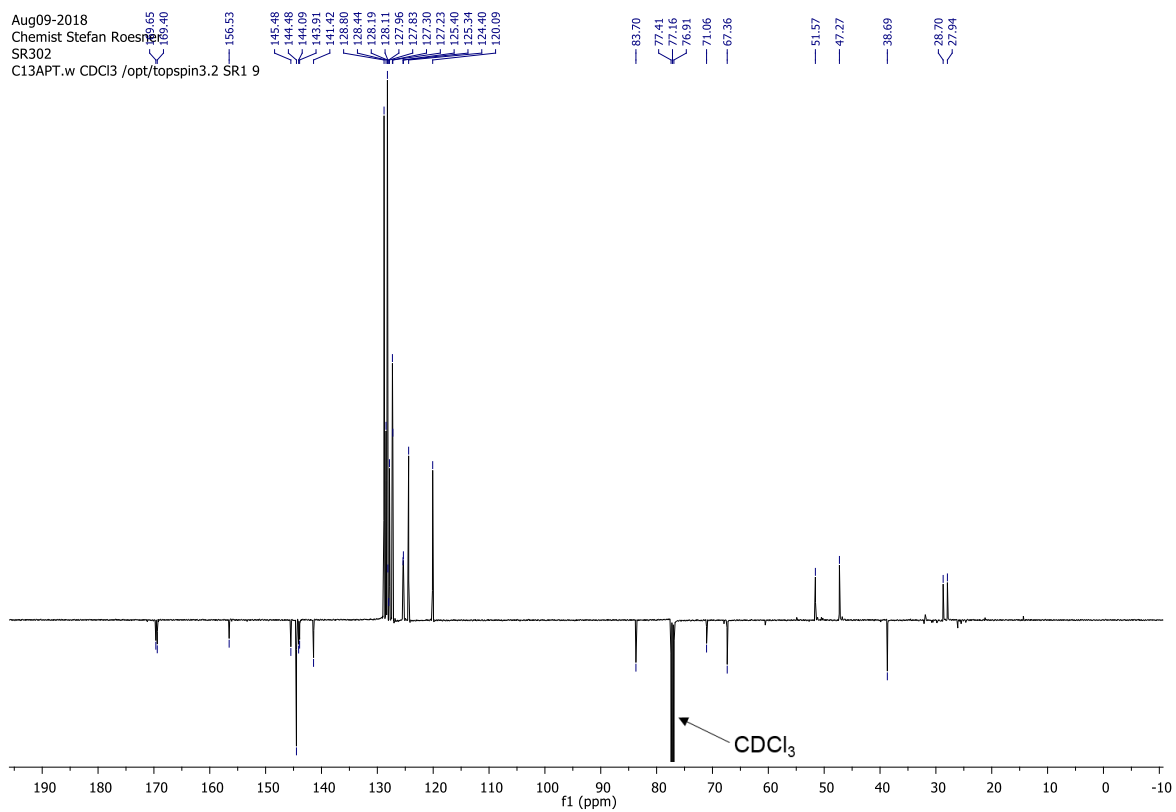

# O<sub>2</sub>N-GOx-Asn(Trt)-OCumyl (2d)

<sup>1</sup>H NMR (400 MHz, CDCl<sub>3</sub>)

Aug21-2018  
SR312  
PROTON.w CDCl3 /opt/topspin3.5pl2 SR1 28

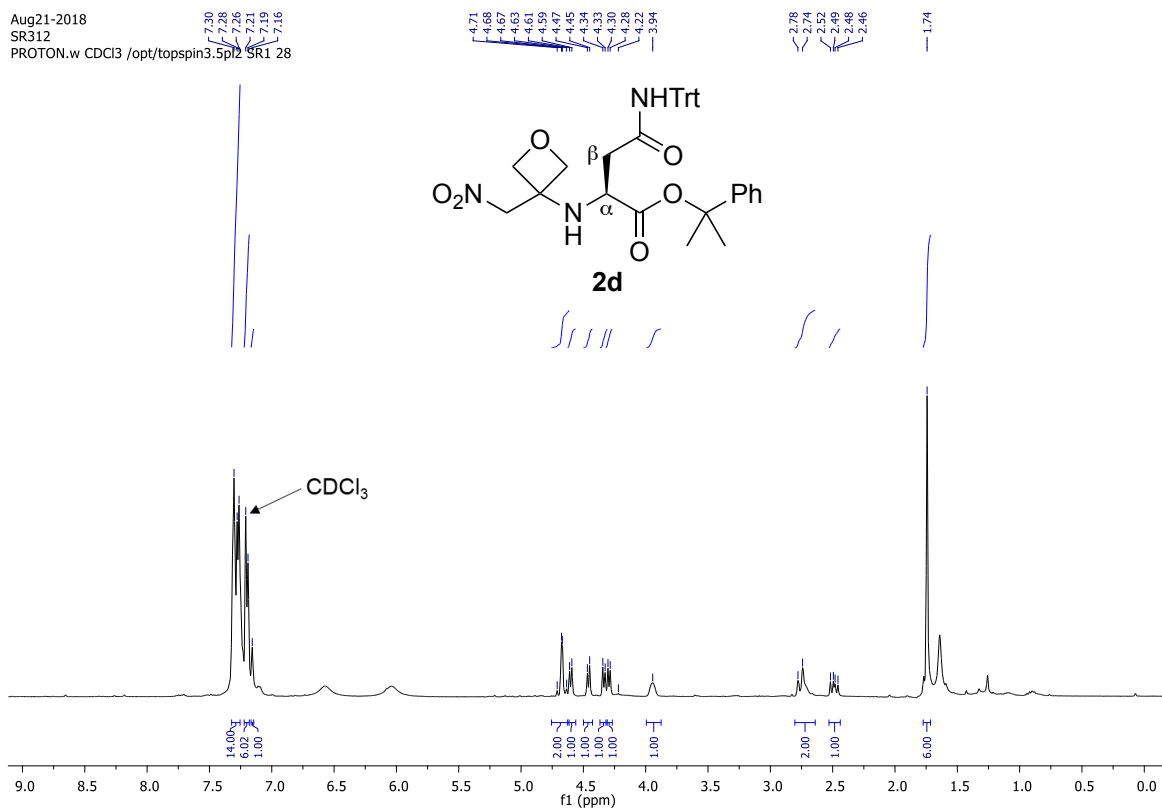

<sup>13</sup>C NMR (101 MHz, CDCl<sub>3</sub>)

Oct09-2018  
SR312  
C13APTlong.w CDCl3 /opt/topspin3.5pl2 SR1 26

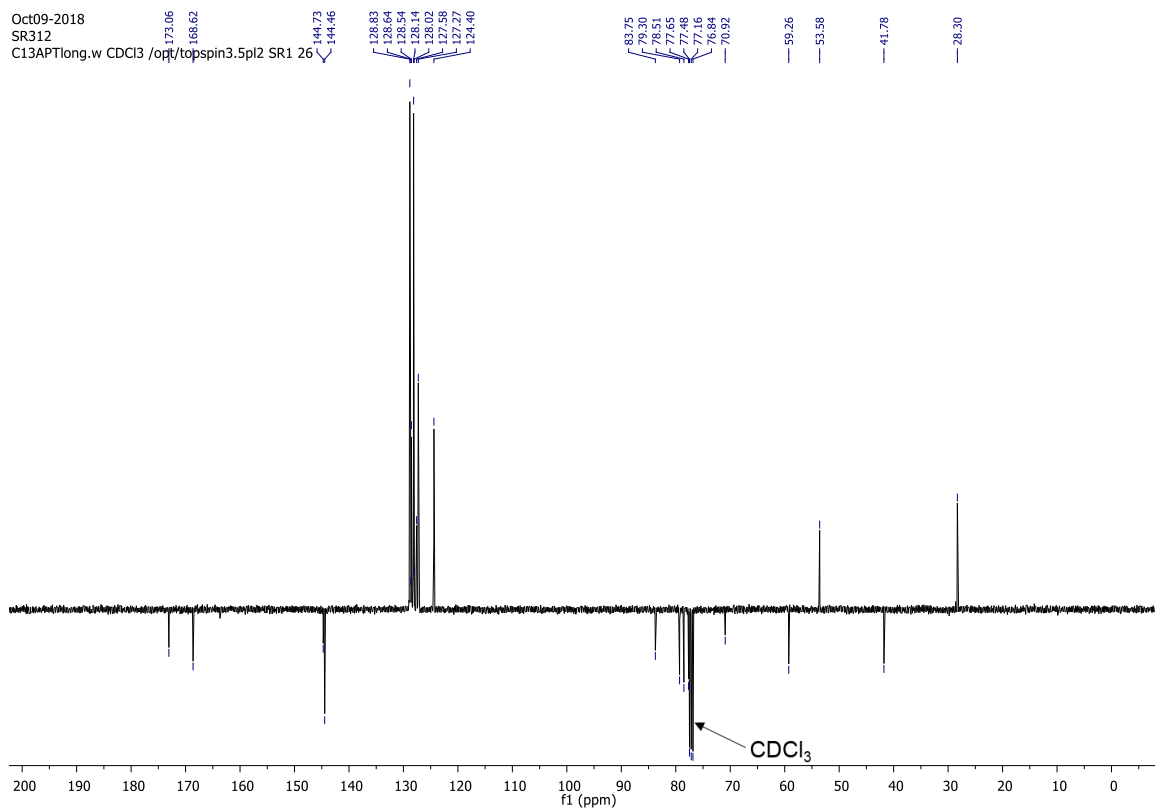

# Fmoc-GOx-Asn(Trt)-OCumyl (3d)

<sup>1</sup>H NMR (400 MHz, CDCl<sub>3</sub>)

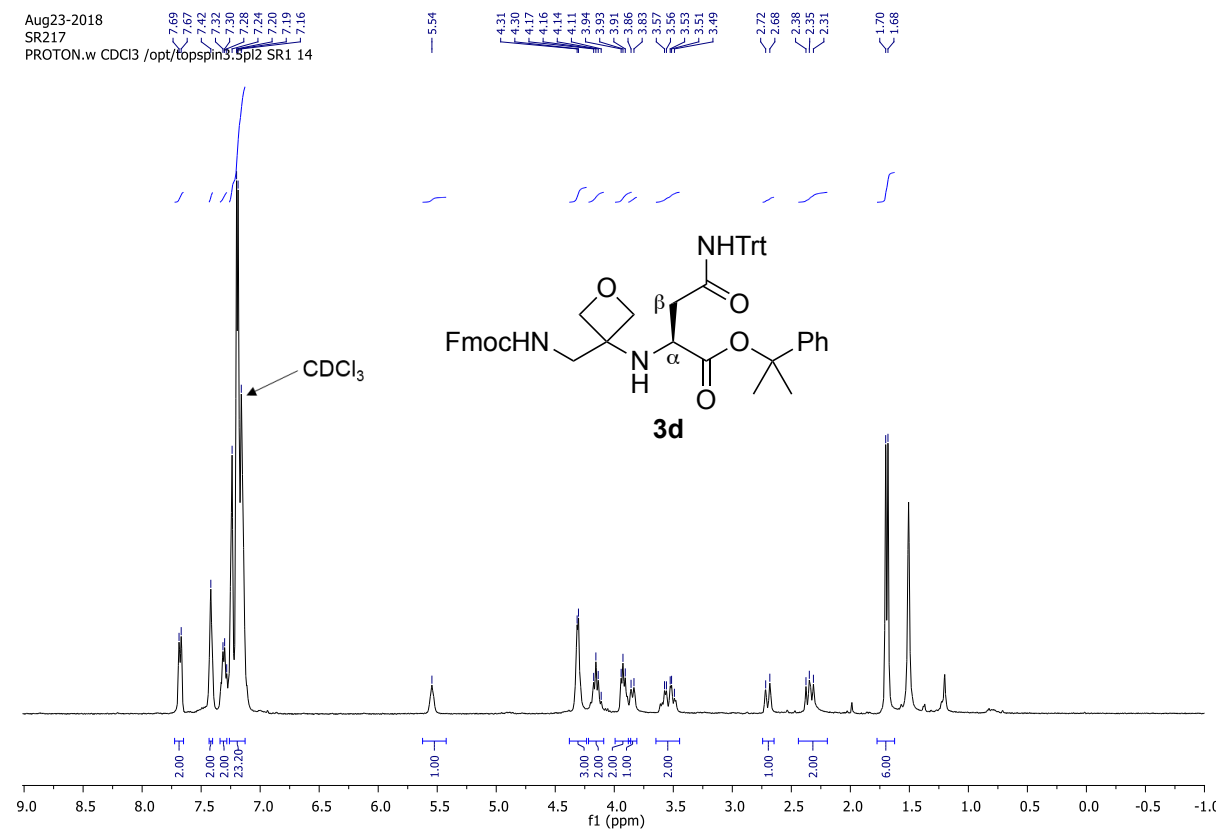

<sup>13</sup>C NMR (101 MHz, CDCl<sub>3</sub>)

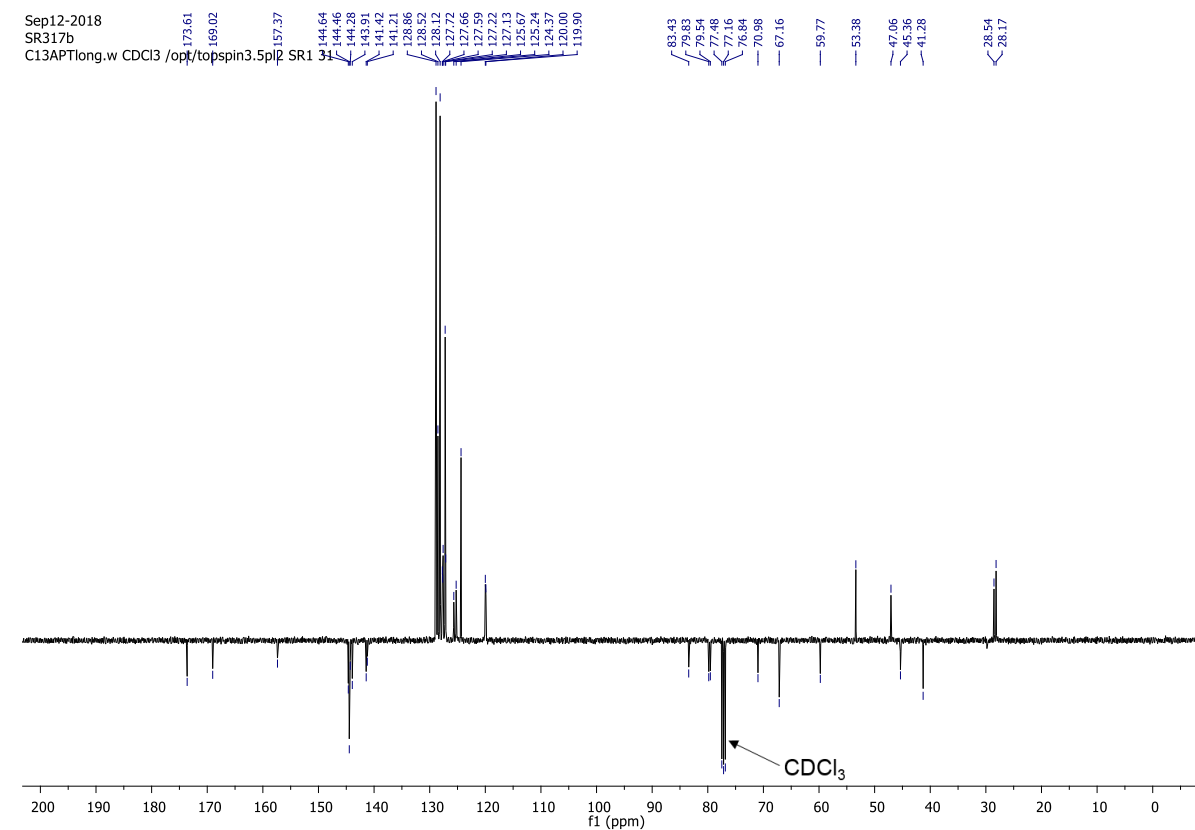

# Fmoc-Gln(Trt)-OCumyl (1e)

<sup>1</sup>H NMR (400 MHz, CDCl<sub>3</sub>)

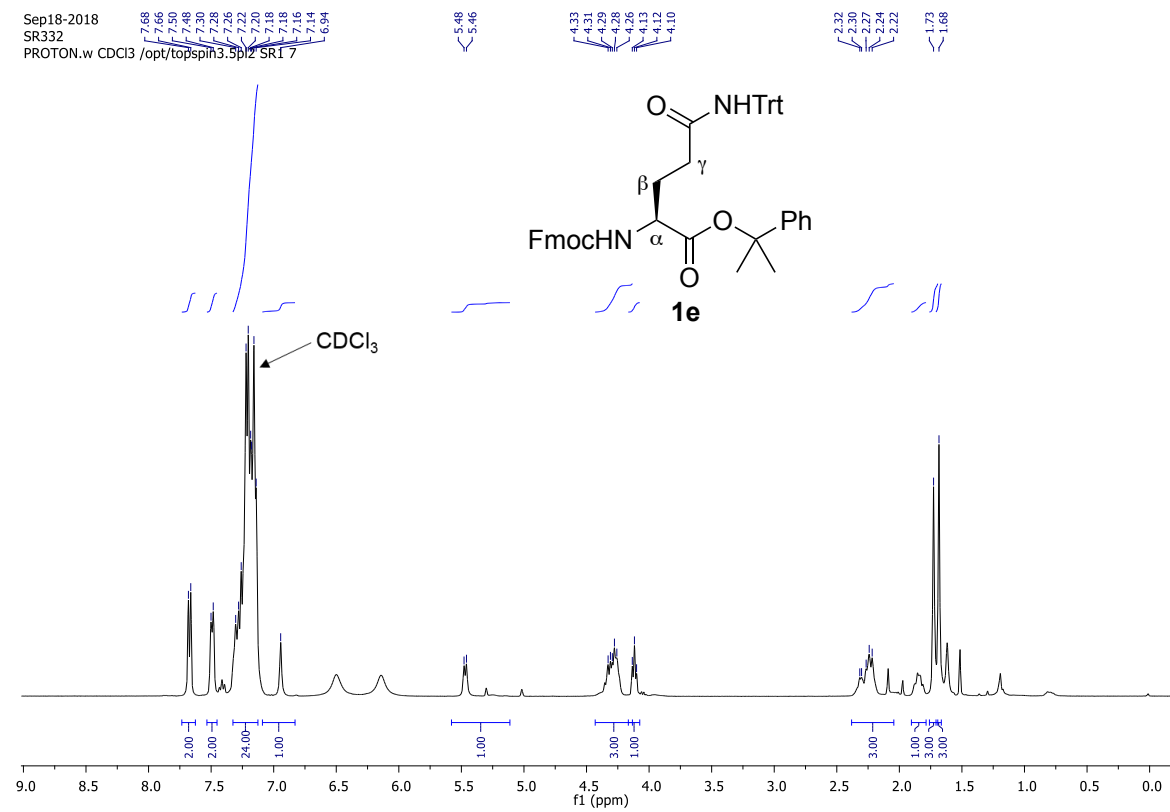

<sup>13</sup>C NMR (101 MHz, CDCl<sub>3</sub>)

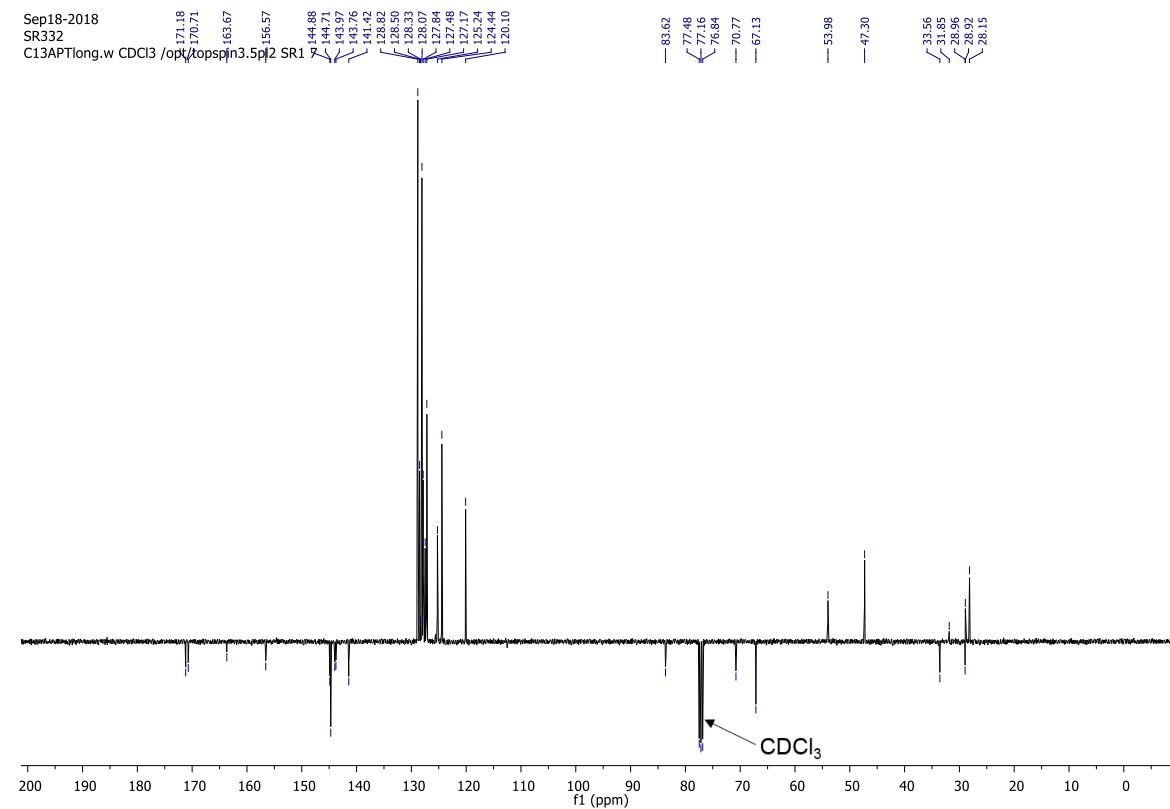

# O<sub>2</sub>N-GO<sub>x</sub>-Gln(Trt)-OCumyl (2e)

<sup>1</sup>H NMR (400 MHz, CDCl<sub>3</sub>)

Sep20-2018  
SR335b  
PROTON.w CDCl3 /opt/topspin3.5pl2 SR1 31

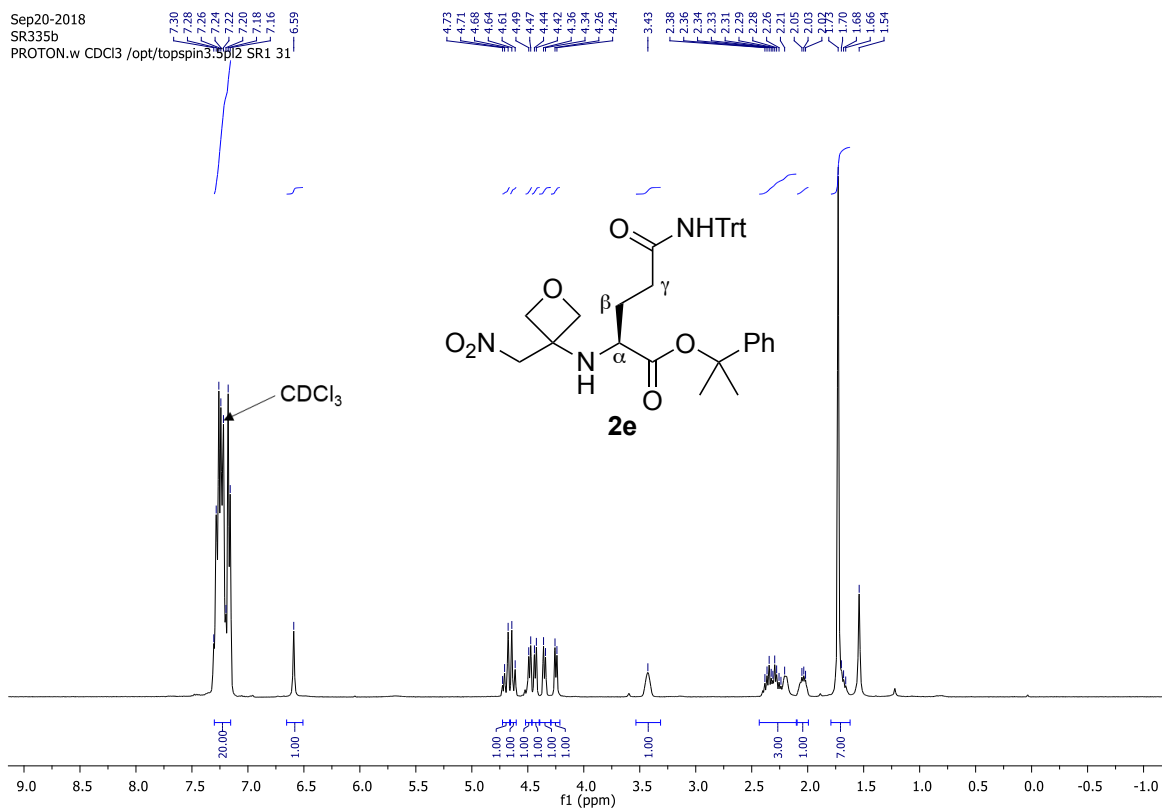

<sup>13</sup>C NMR (101 MHz, CDCl<sub>3</sub>)

Sep21-2018  
SR335b  
C13APTlong.w CDCl3 /opt/topspin3.5pl2 SR1 46

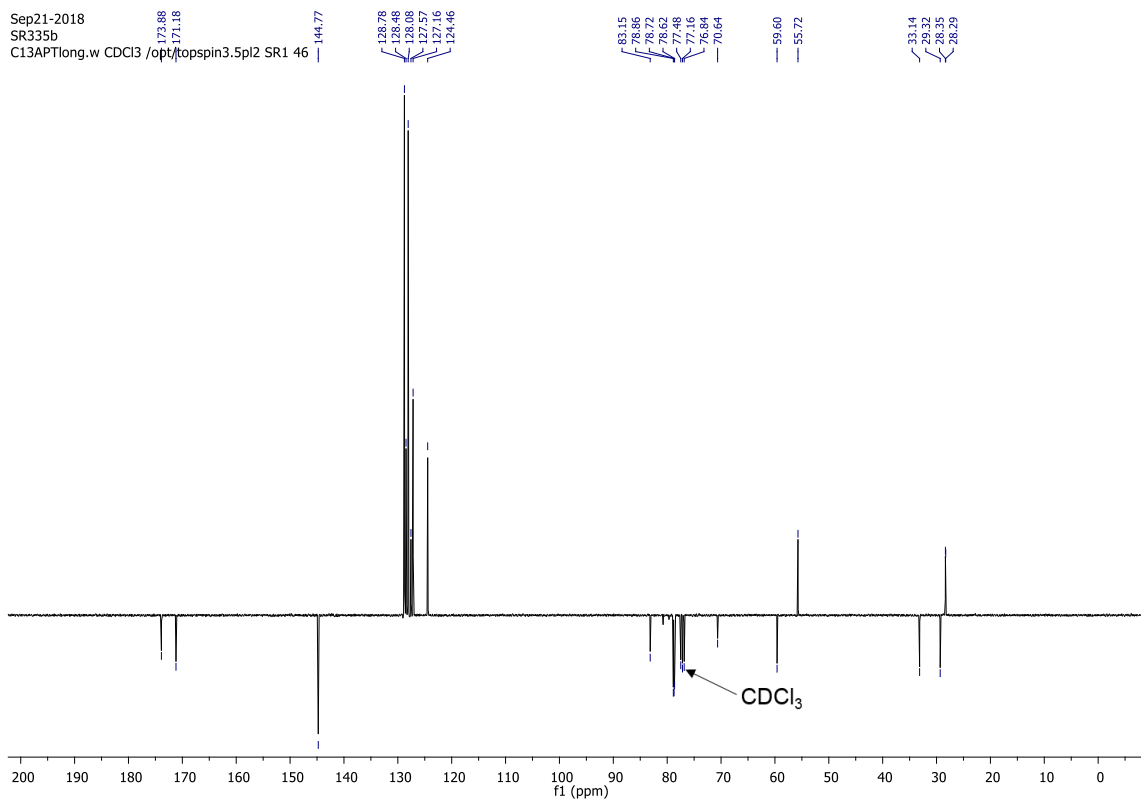



# Fmoc-GOx-Gln(Trt)-OCumyl (3e)

<sup>1</sup>H NMR (400 MHz, CDCl<sub>3</sub>)

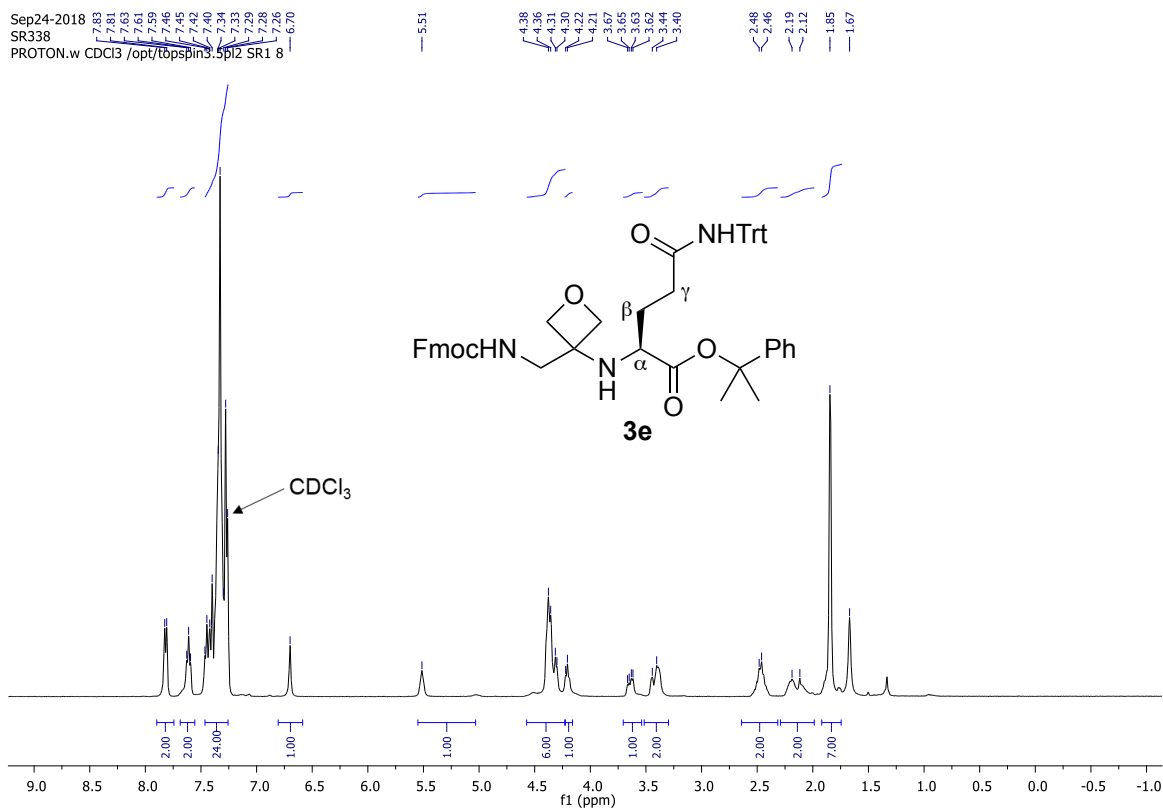

<sup>13</sup>C NMR (101 MHz, CDCl<sub>3</sub>)

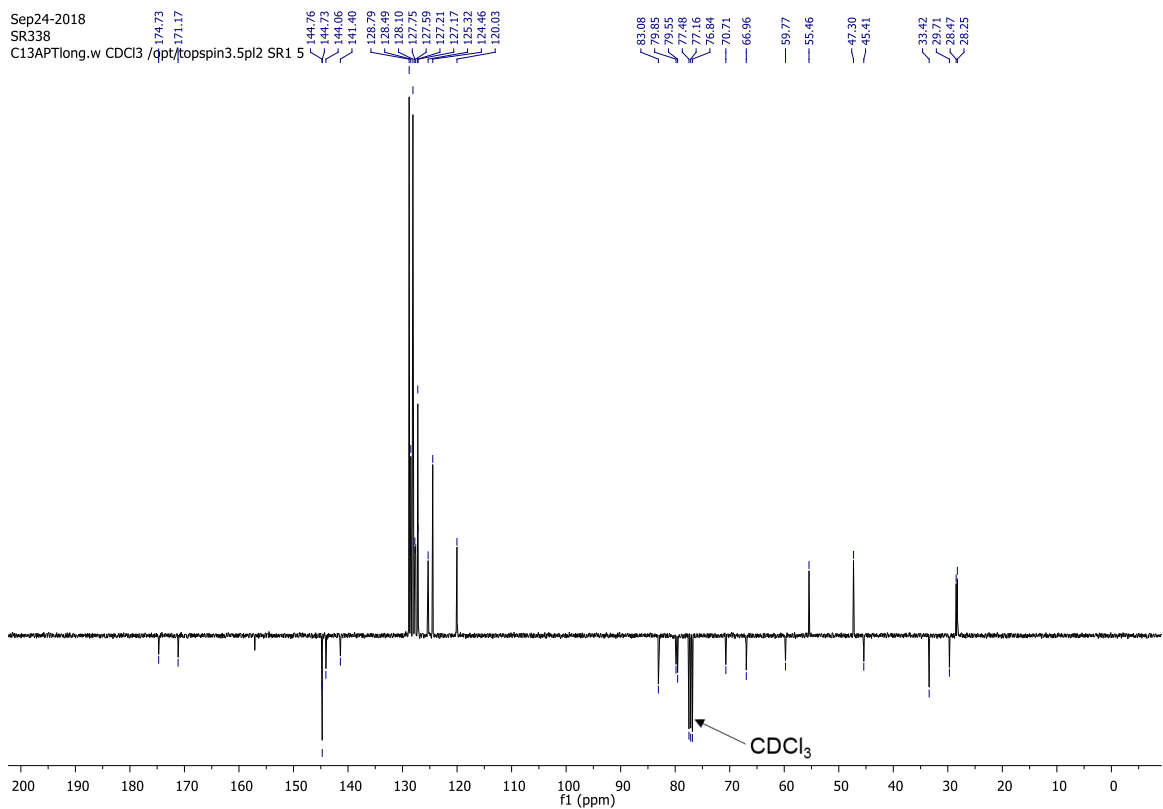

# Fmoc-Trp(Boc)-OCumyl (1f)

<sup>1</sup>H NMR (400 MHz, CDCl<sub>3</sub>)

Jul31-2017  
LT012\_Fmoc-Trp(Boc)-OCumyl  
PROTON.w CDCl3 /opt/topspin3.5p12 LT 50

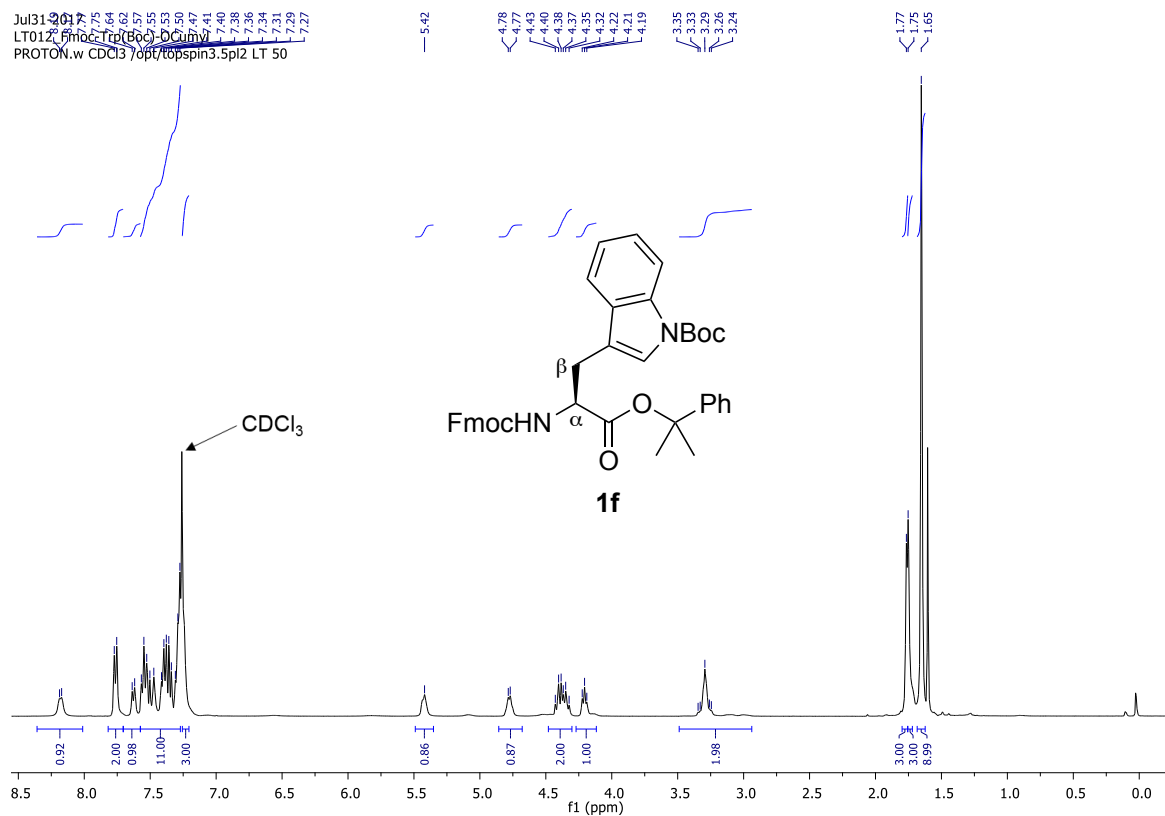

<sup>13</sup>C NMR (101 MHz, CDCl<sub>3</sub>)

Jul31-2017  
LT012\_Fmoc-Trp(Boc)-OCumyl  
C13APTlong.w CDCl3 /opt/topspin3.5p12 LT 50

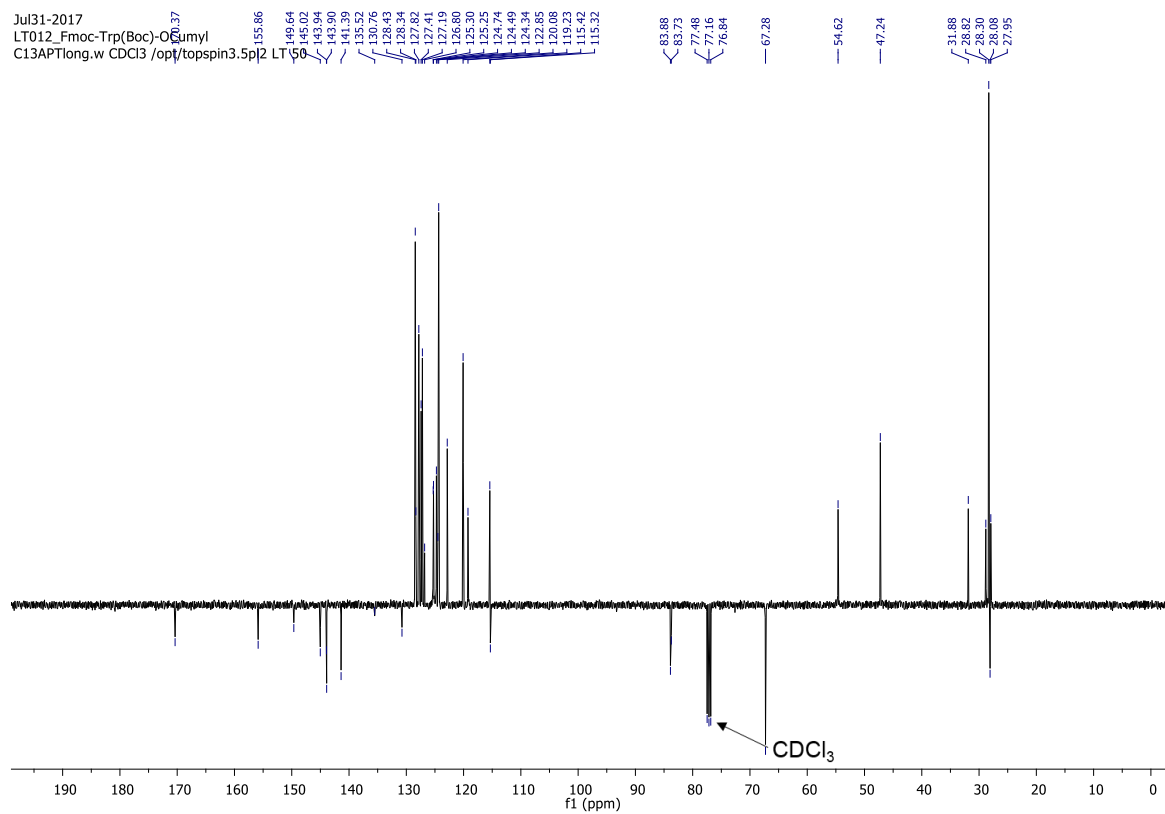

# NO<sub>2</sub>-GOx-Trp(Boc)-OCumyl (2f)

<sup>1</sup>H NMR (400 MHz, CDCl<sub>3</sub>)

Aug07-2017  
LT015\_NO2-GOx-Trp(Boc)-OCumyl  
PROTON.w CDCl3 /opt/topspin3.5pl2 LT 43

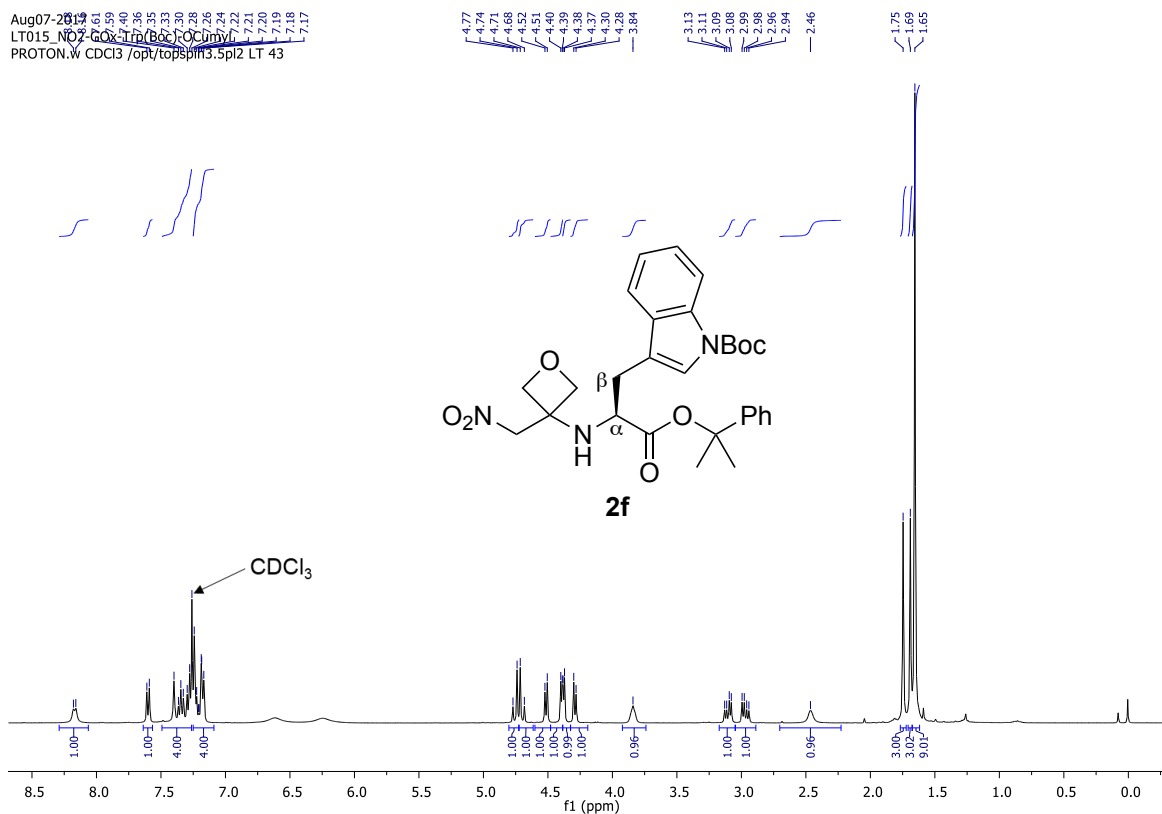

<sup>13</sup>C NMR (101 MHz, CDCl<sub>3</sub>)

Aug07-2017  
LT015\_NO2-GOx-Trp(Boc)-OCumyl  
C13APTIong.w CDCl3 /opt/topspin3.5pl2 LT 43

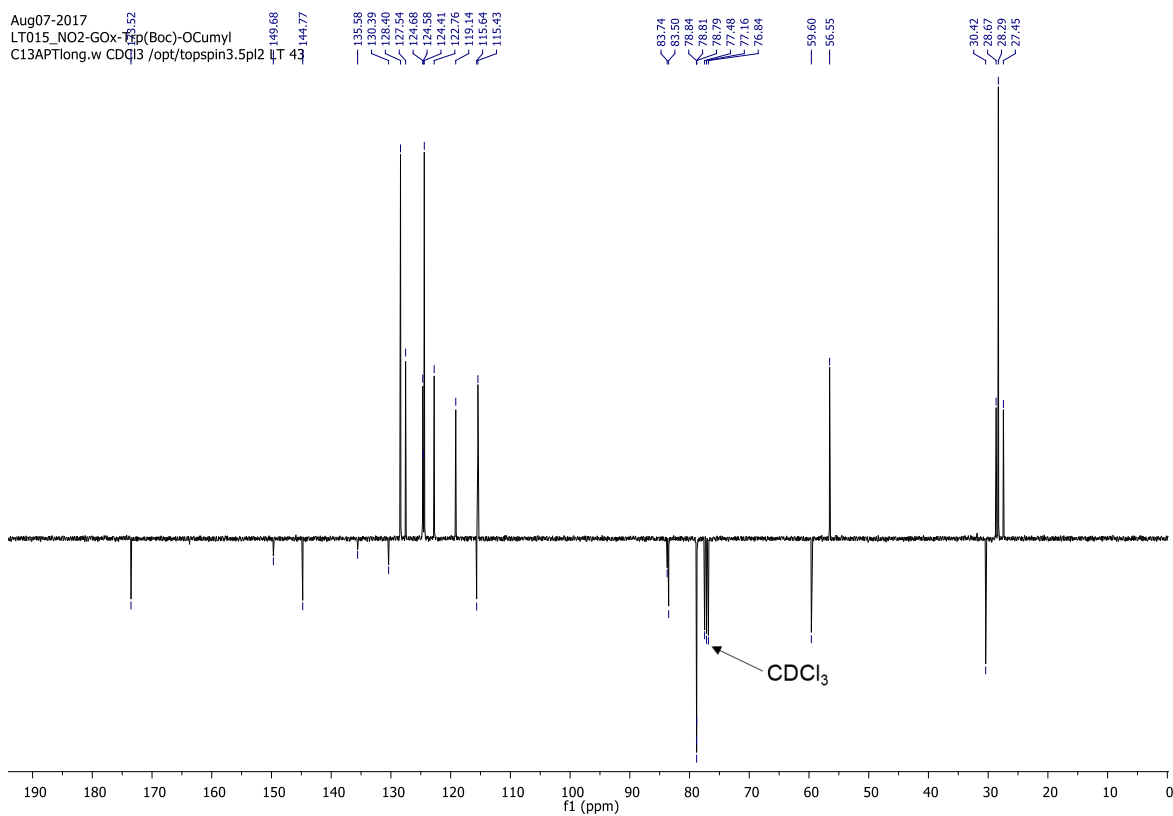



# Fmoc-Tyr(*t*Bu)-OCumyl (1g)

<sup>1</sup>H NMR (400 MHz, CDCl<sub>3</sub>)

Aug02-2018  
SR307  
PROTON.w CDCl3 /opt/topspin3.5pl2 SR1 10

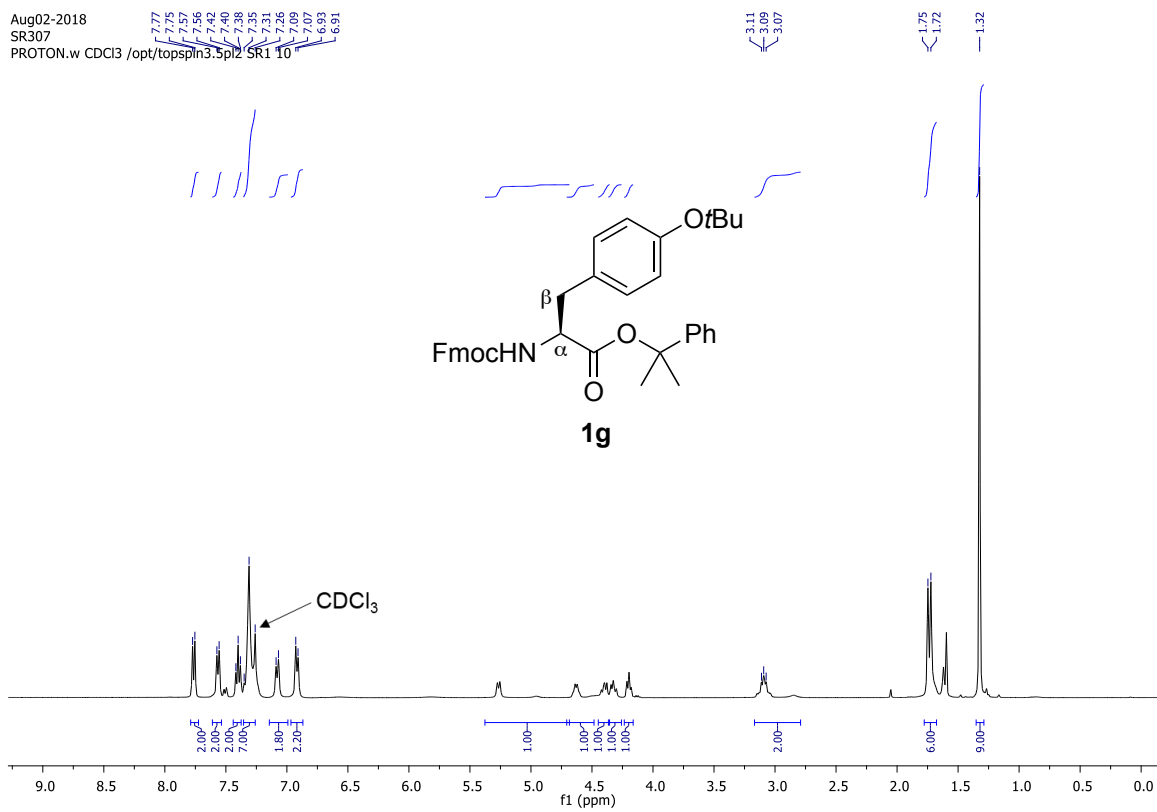

<sup>13</sup>C NMR (101 MHz, CDCl<sub>3</sub>)

Aug02-2018  
SR307  
C13APTlong.w CDCl3 /opt/tppspin3.5pl2 SR1 10

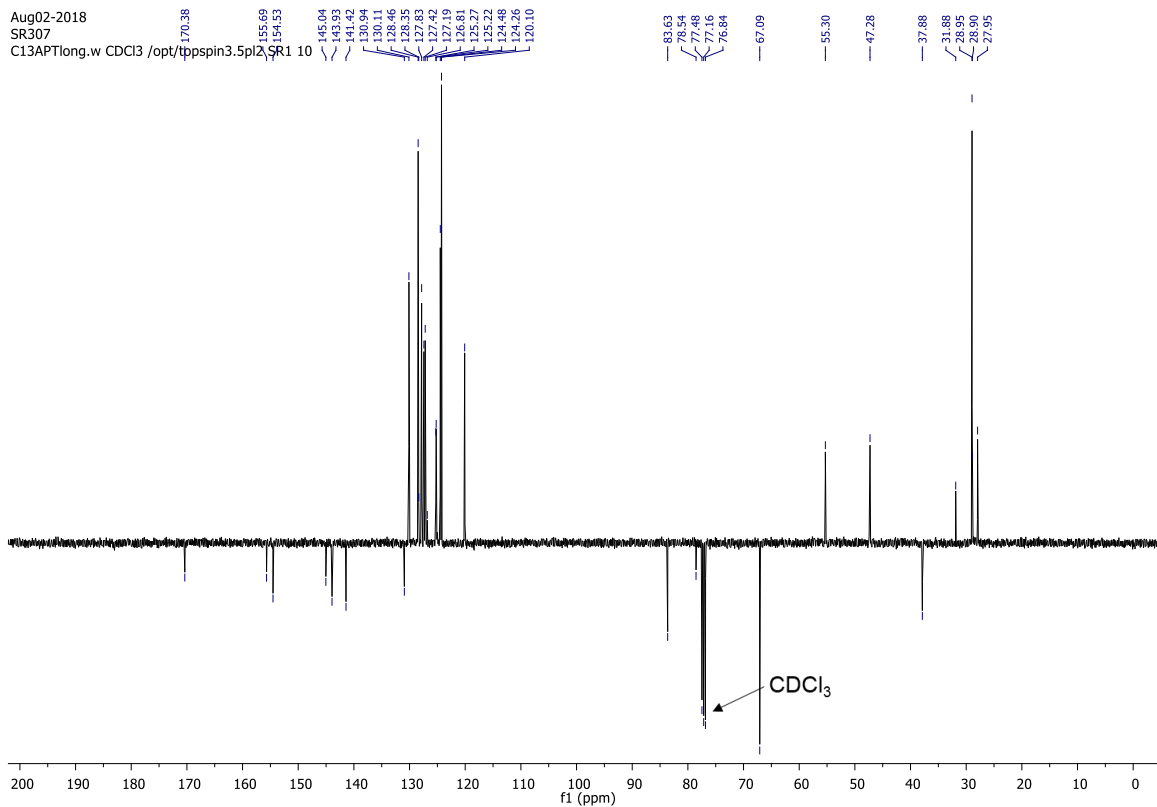

# O<sub>2</sub>N-GOx-Tyr(*t*Bu)-OCumyl (2g)

<sup>1</sup>H NMR (400 MHz, CDCl<sub>3</sub>)

Aug22-2018  
SR313  
PROTON.w CDCl3 /opt/topspin3.5/pl2 SR1 15

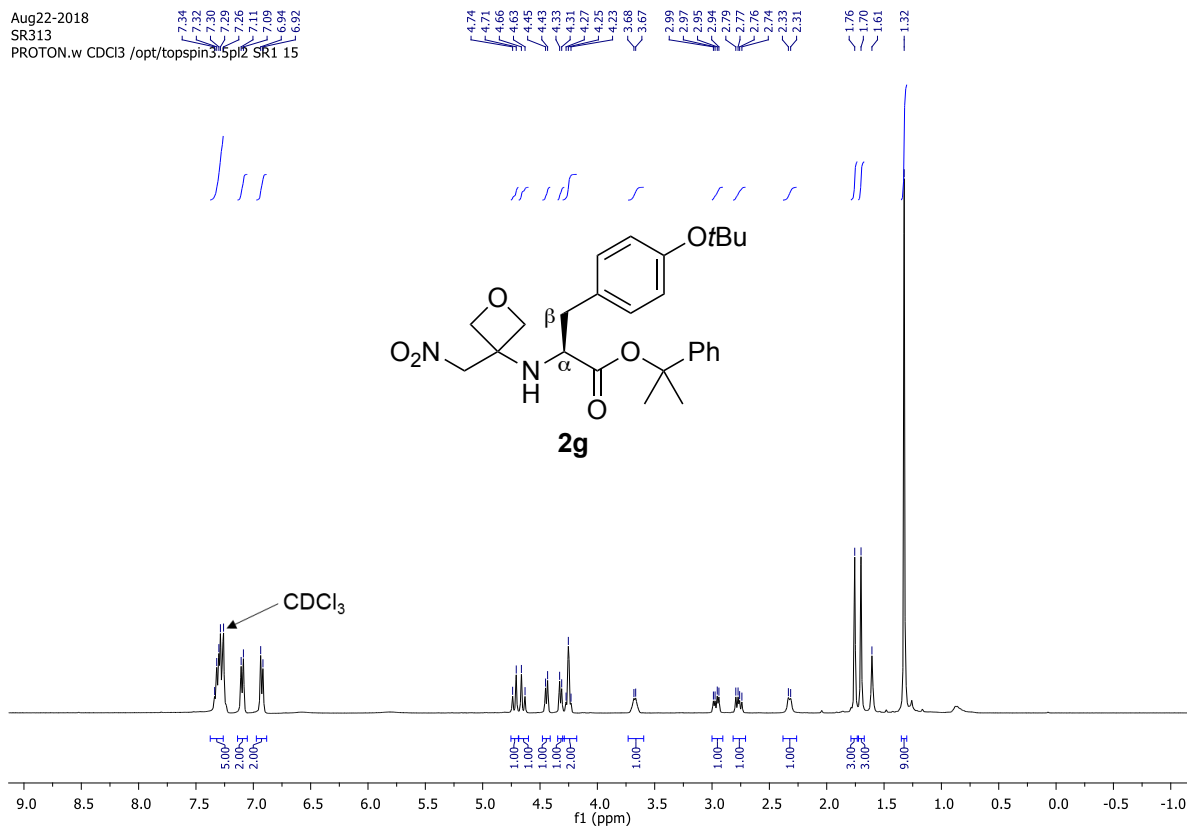

<sup>13</sup>C NMR (101 MHz, CDCl<sub>3</sub>)

Aug22-2018  
SR313

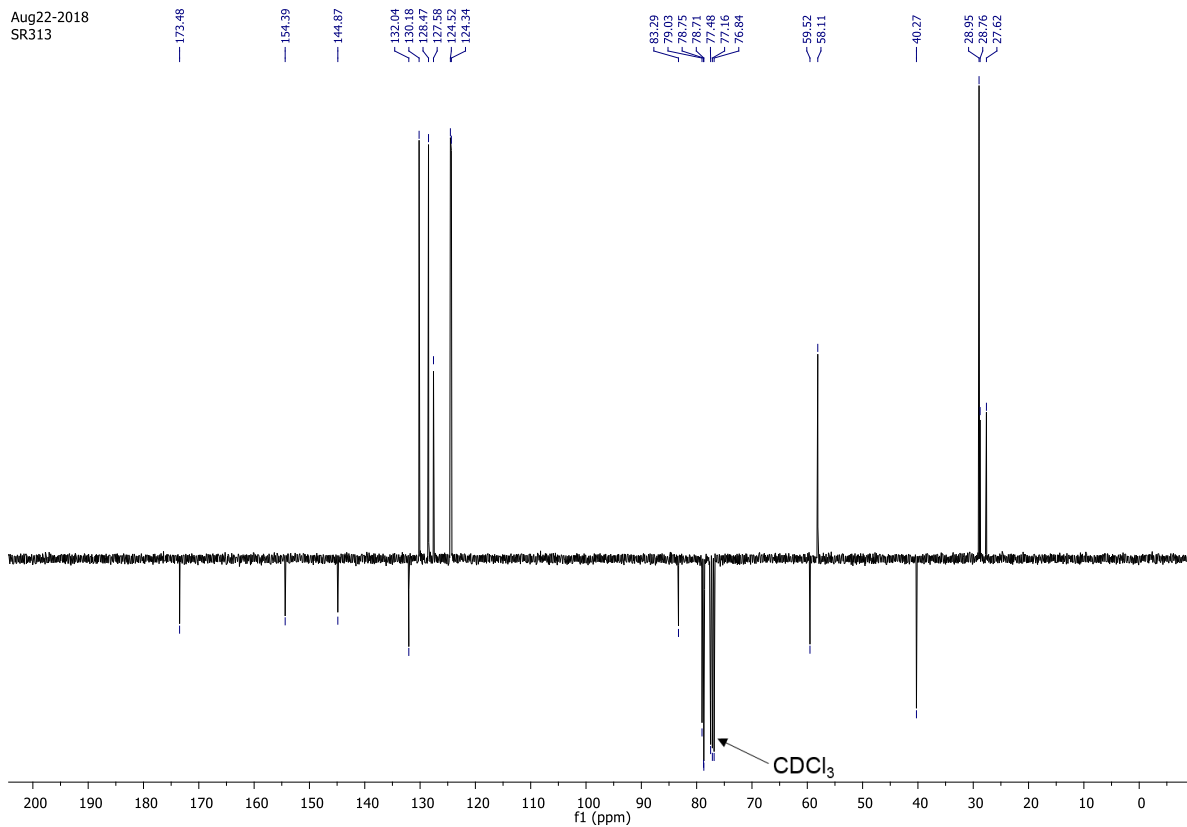

# Fmoc-GOx-Tyr(*t*Bu)-OCumyl (3g)

<sup>1</sup>H NMR (400 MHz, CDCl<sub>3</sub>)

Sep10-2018  
SR326  
PROTON.w CDCl3 /opt/topspin3.5/pl2/SR1 15

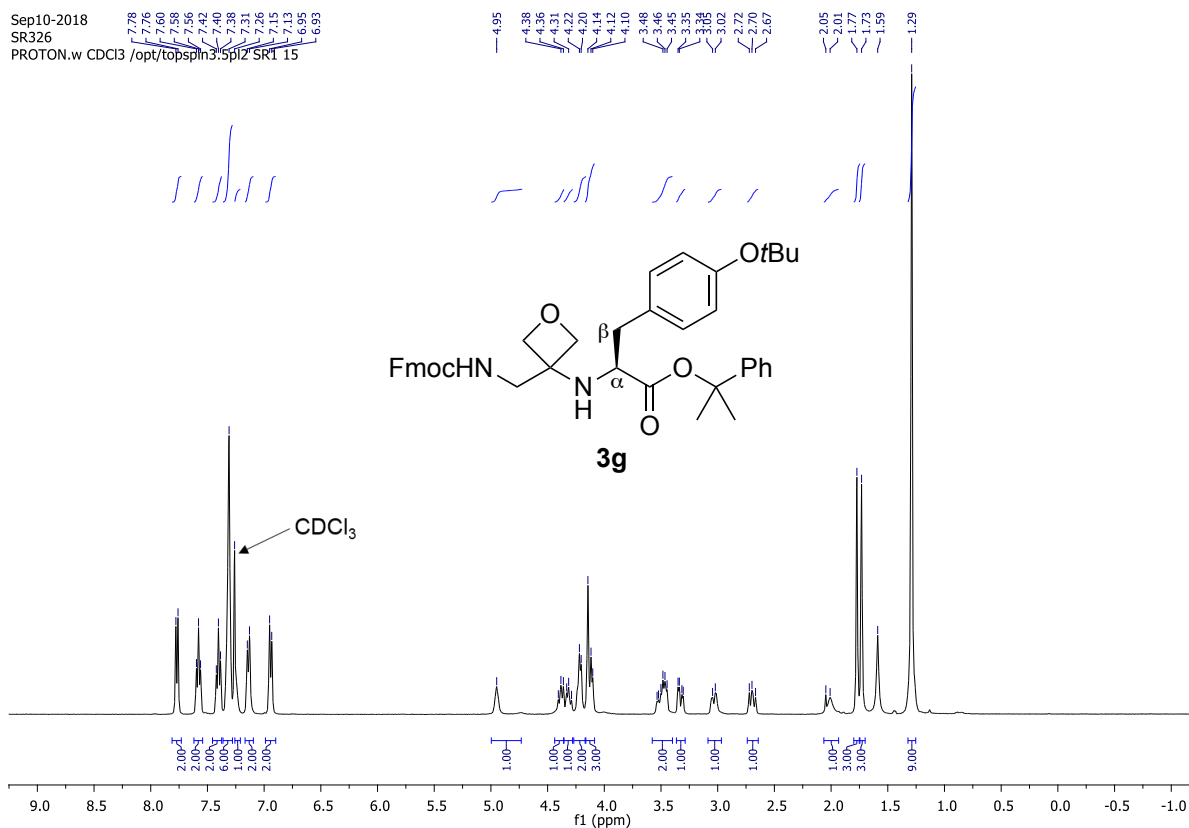

<sup>13</sup>C NMR (101 MHz, CDCl<sub>3</sub>)

Sep10-2018  
SR326  
C13APTlong.w CDCl3 /opt/topspin3.5/pl2/SR1 6

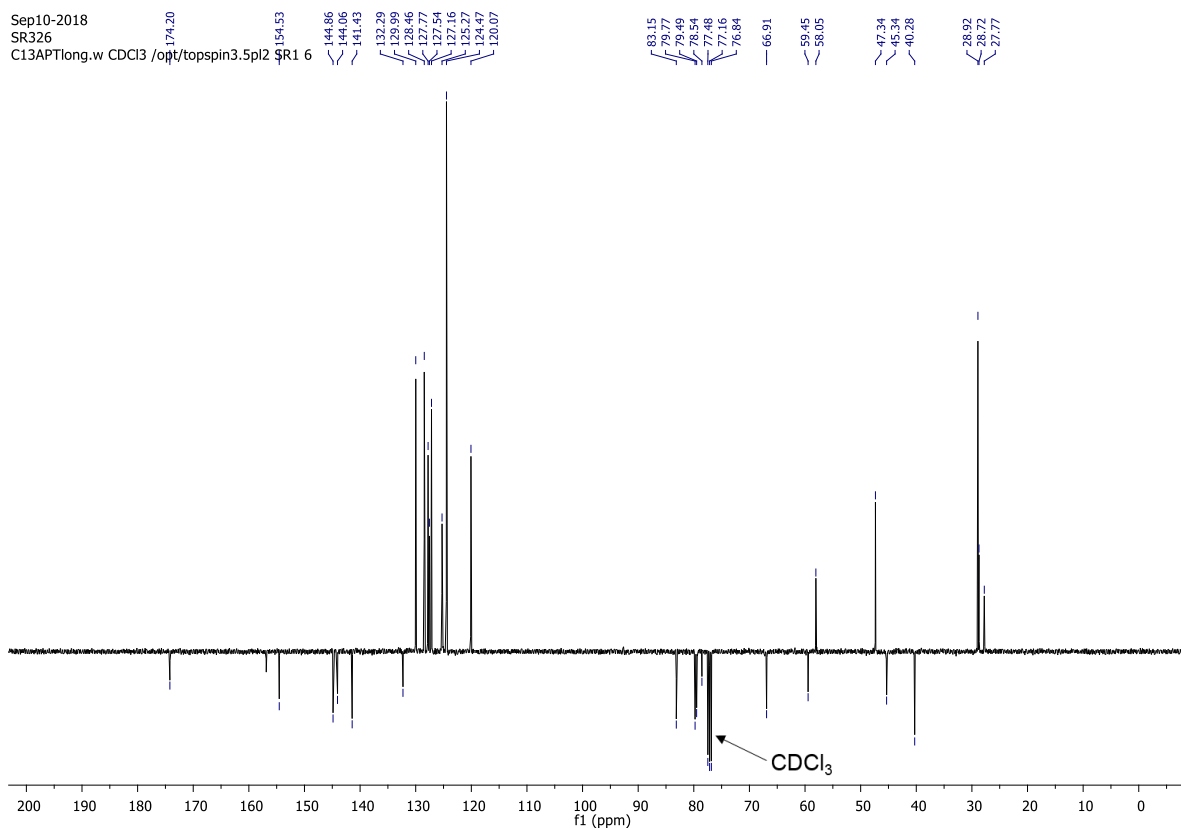

# Fmoc-Cys(Trt)-OCumyl (1h)

<sup>1</sup>H NMR (400 MHz, CDCl<sub>3</sub>)

Sep18-2018  
SR333  
PROTON.w CDCl3 /opt/topspin3.5pl2 SR1 16

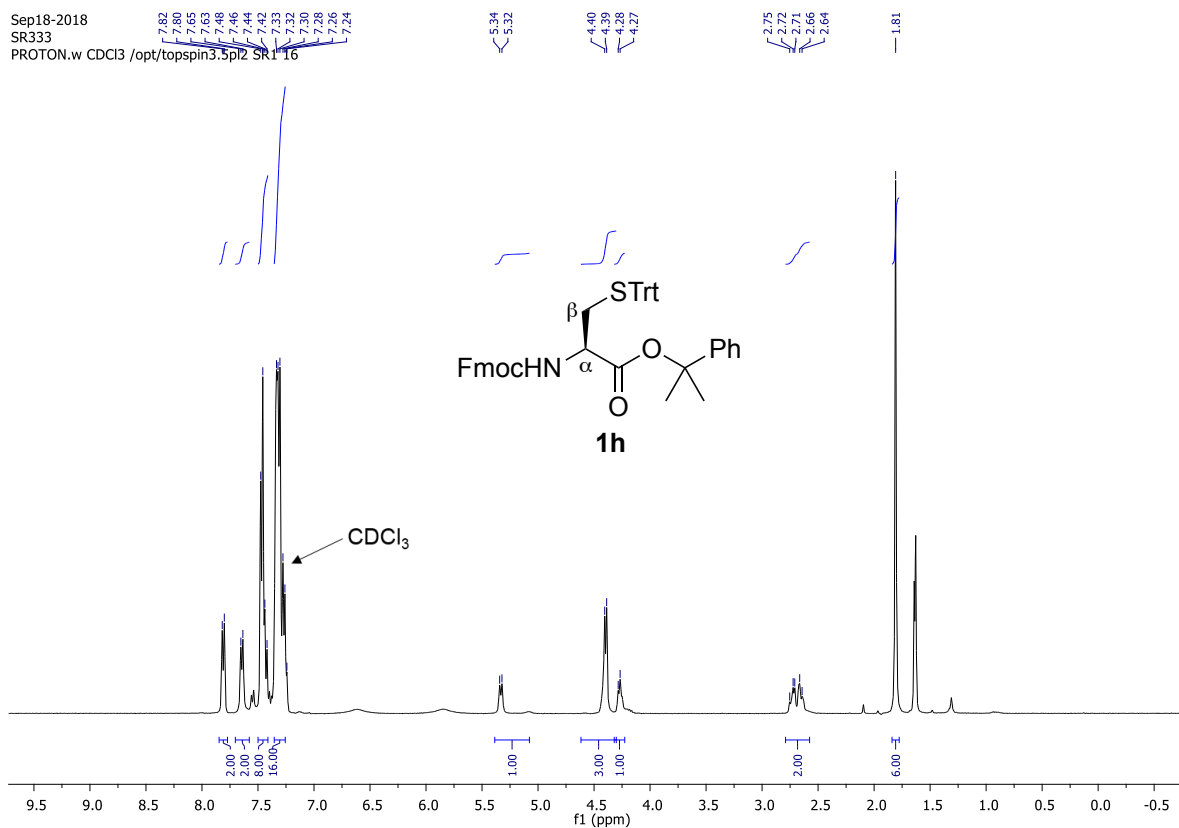

<sup>13</sup>C NMR (101 MHz, CDCl<sub>3</sub>)

Sep18-2018  
SR333  
C13APT.w CDCl3 /opt/topspin3.5pl2 SR1 16

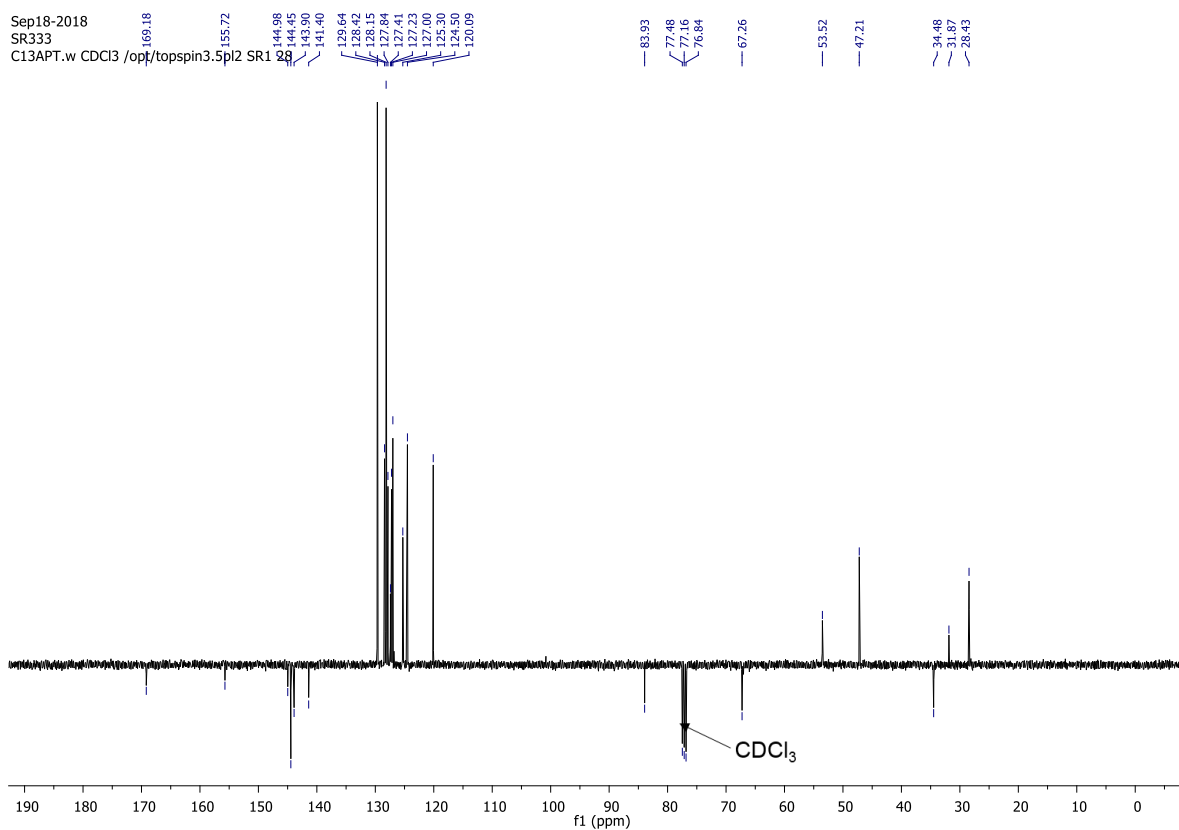



# NO<sub>2</sub>-GOx-Cys(Trt)-OCumyl (2h)

<sup>1</sup>H NMR (400 MHz, CDCl<sub>3</sub>)

Sep21-2018  
SR336  
PROTON.w CDCl3 /opt/topspin3.5pl2 SR1 45

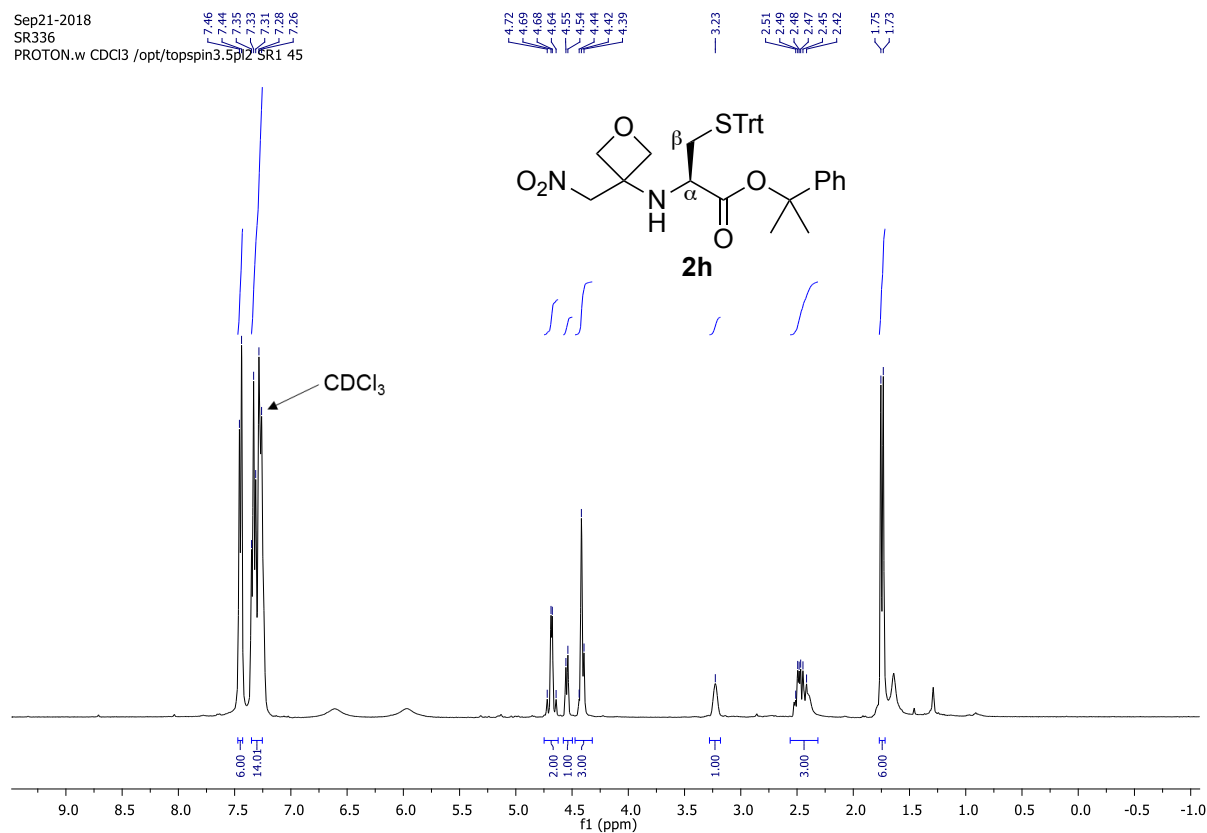

<sup>13</sup>C NMR (101 MHz, CDCl<sub>3</sub>)

Sep21-2018  
SR336  
C13APTlong.w CDCl3 /opt/topspin3.5pl2 SR1 45

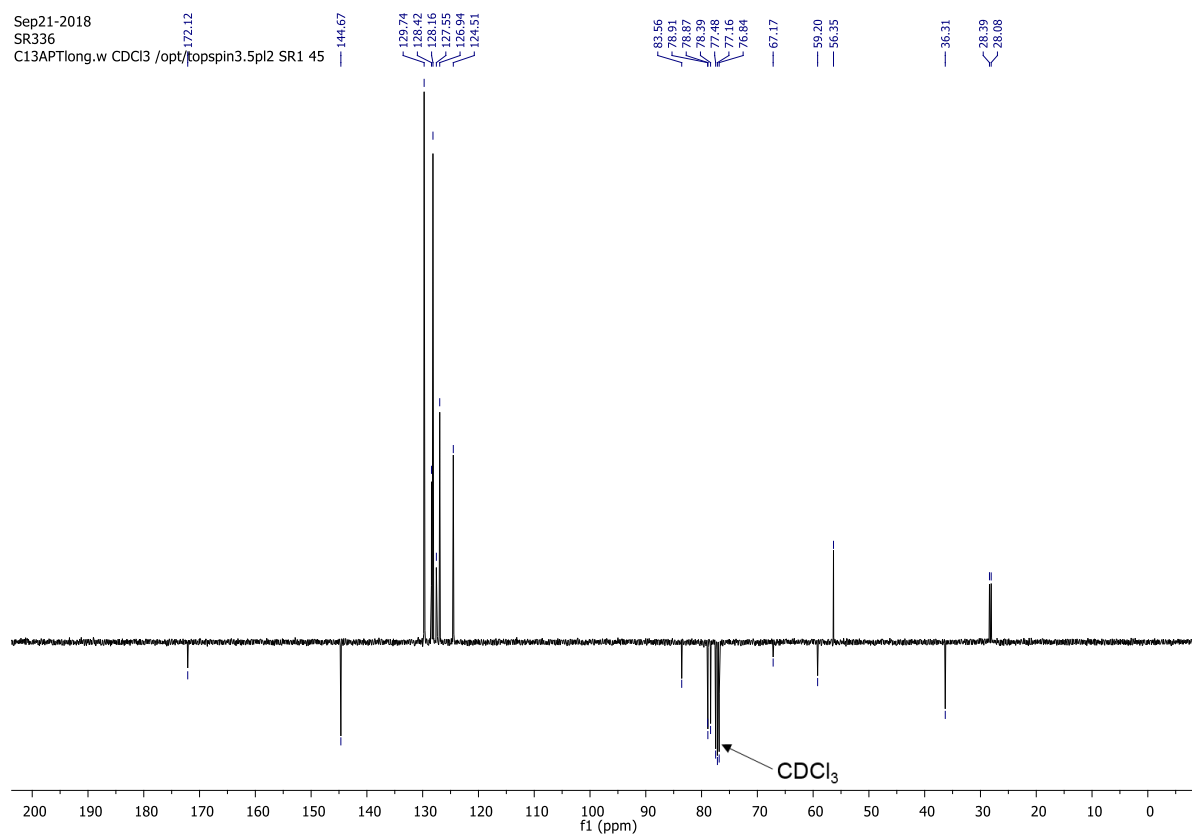

# Fmoc-GOx-Cys(Trt)-OCumyl (3h)

<sup>1</sup>H NMR (400 MHz, CDCl<sub>3</sub>)

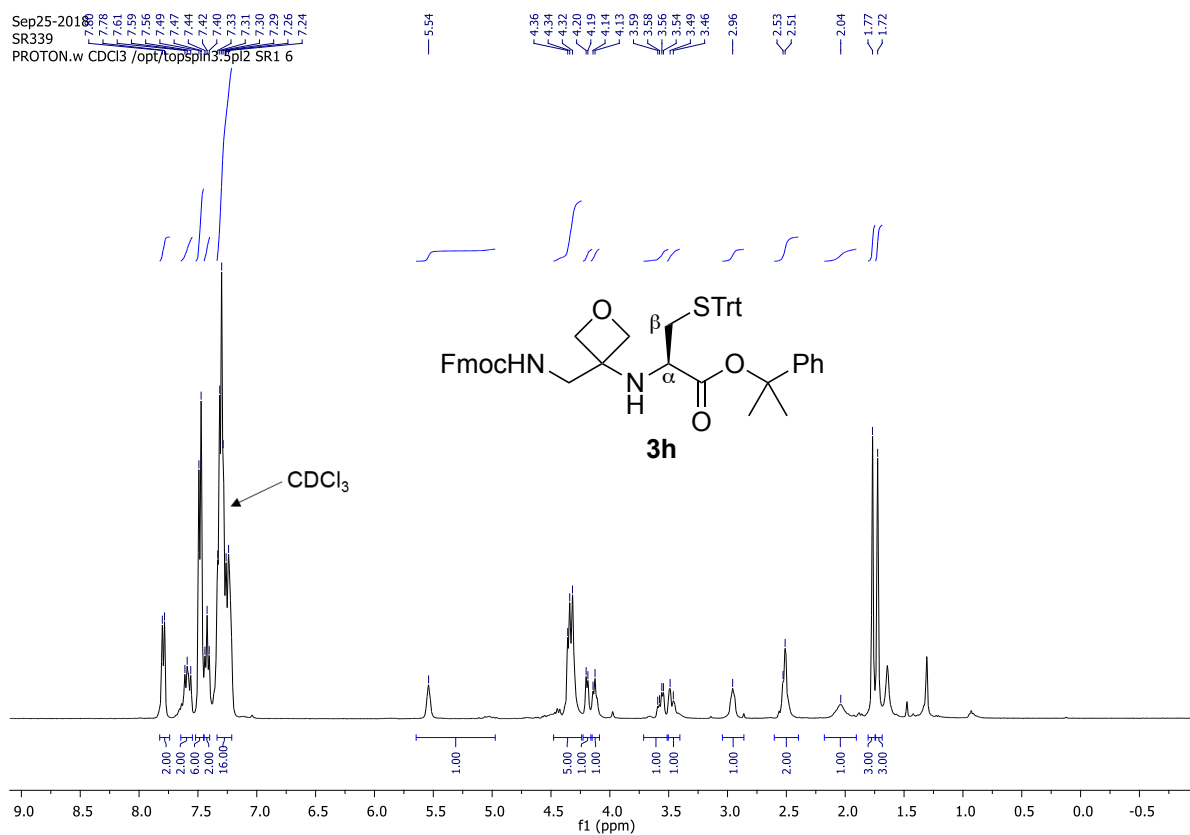

<sup>13</sup>C NMR (101 MHz, CDCl<sub>3</sub>)

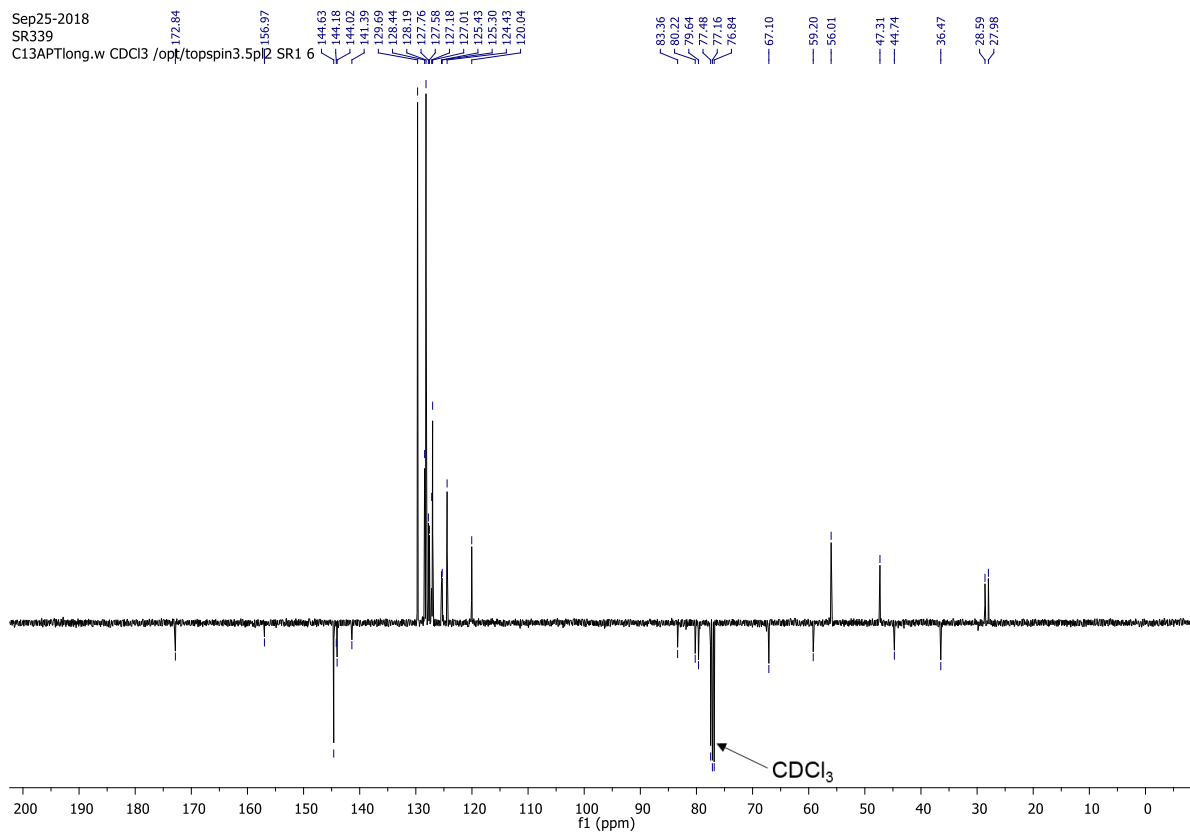

# Fmoc-Met-OCumyl (1i)

<sup>1</sup>H NMR (400 MHz, CDCl<sub>3</sub>)

Aug01-2017  
LT016\_Fmoc-Met-OCumyl  
PROTON.w CDCl3 /opt/topspin3.5pl2 LT 50

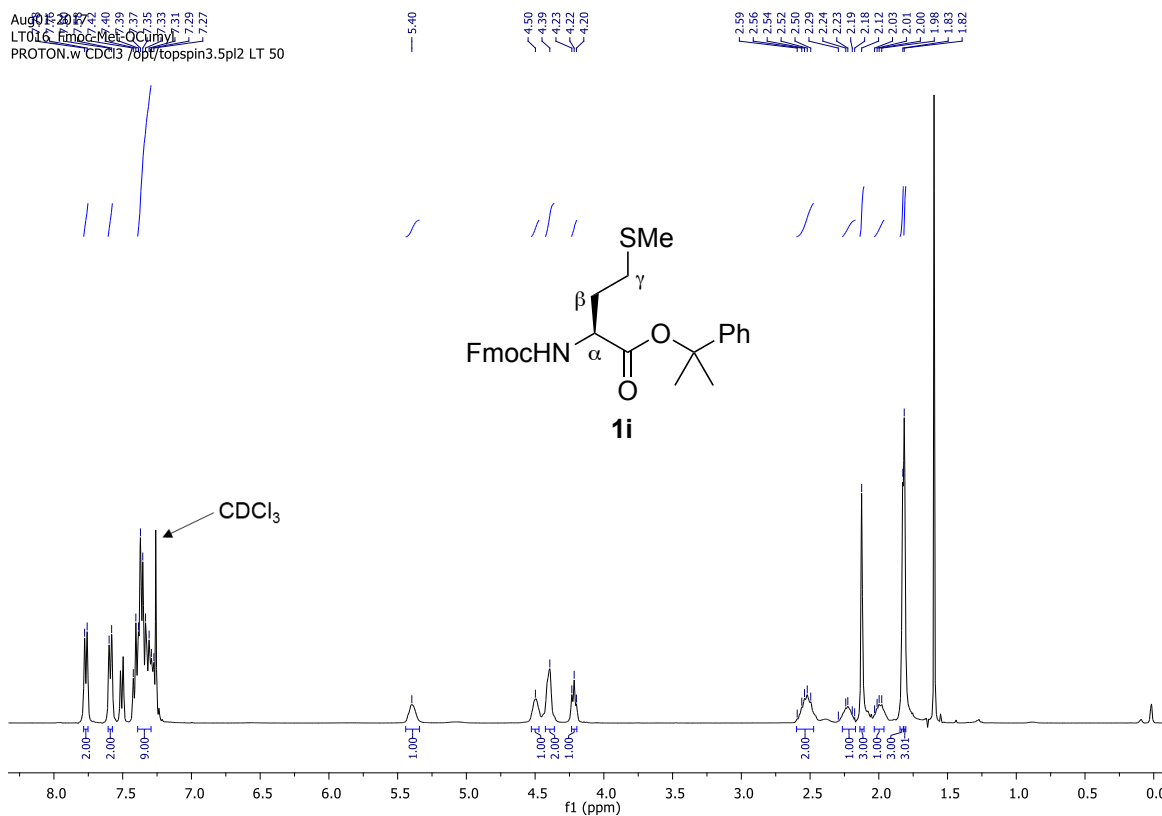

<sup>13</sup>C NMR (101 MHz, CDCl<sub>3</sub>)

Aug01-2017  
LT016\_Fmoc-Met-OCumyl  
C13APTopg.w CDCl3 /opt/topspin3.5pl2 LT 50

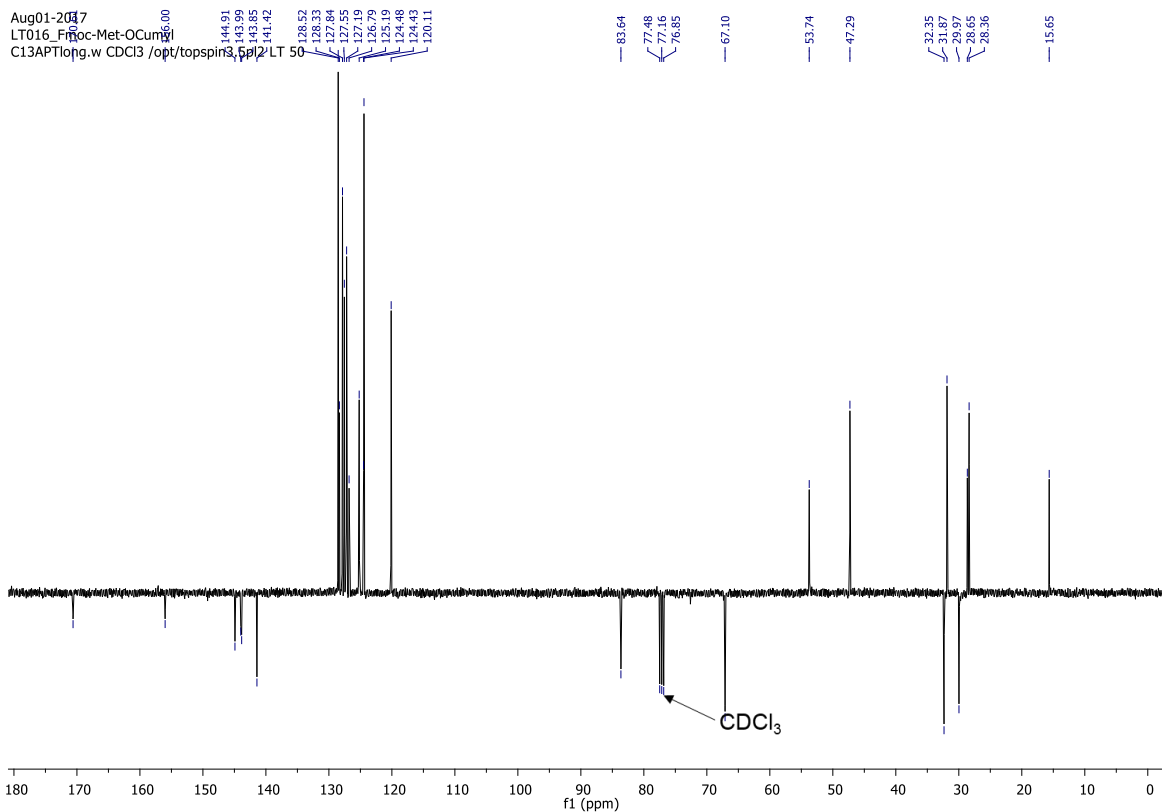

# NO<sub>2</sub>-GOx-Met-OCumyl (2i)

<sup>1</sup>H NMR (400 MHz, CDCl<sub>3</sub>)

Aug15-2017  
LT019\_NO2-GOx-Met-OCumyl  
PROTON.w CDCl3 /opt/topspin3.5pl2 LT 50

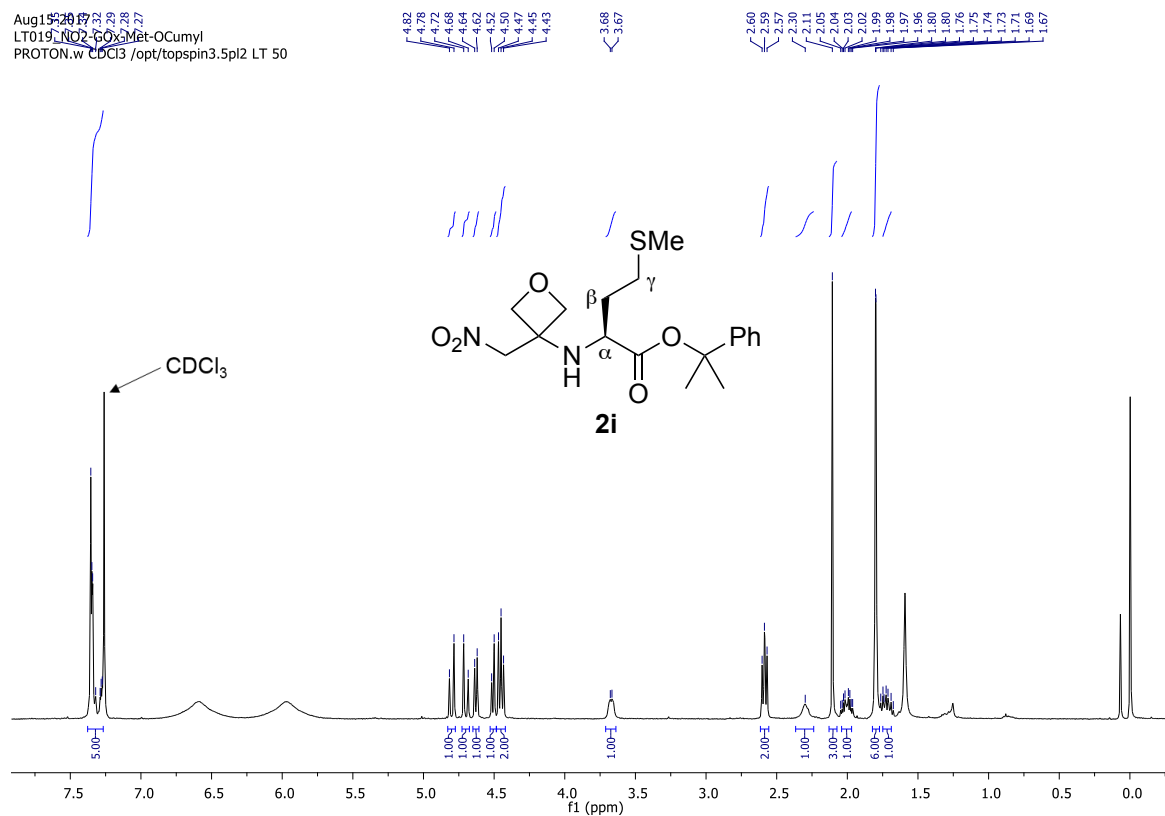

<sup>13</sup>C NMR (101 MHz, CDCl<sub>3</sub>)

Aug15-2017  
LT019\_NO2-GOx-Met-OCumyl  
C13APTI09.w CDCl3 /opt/topspin3.5pl2 LT 50

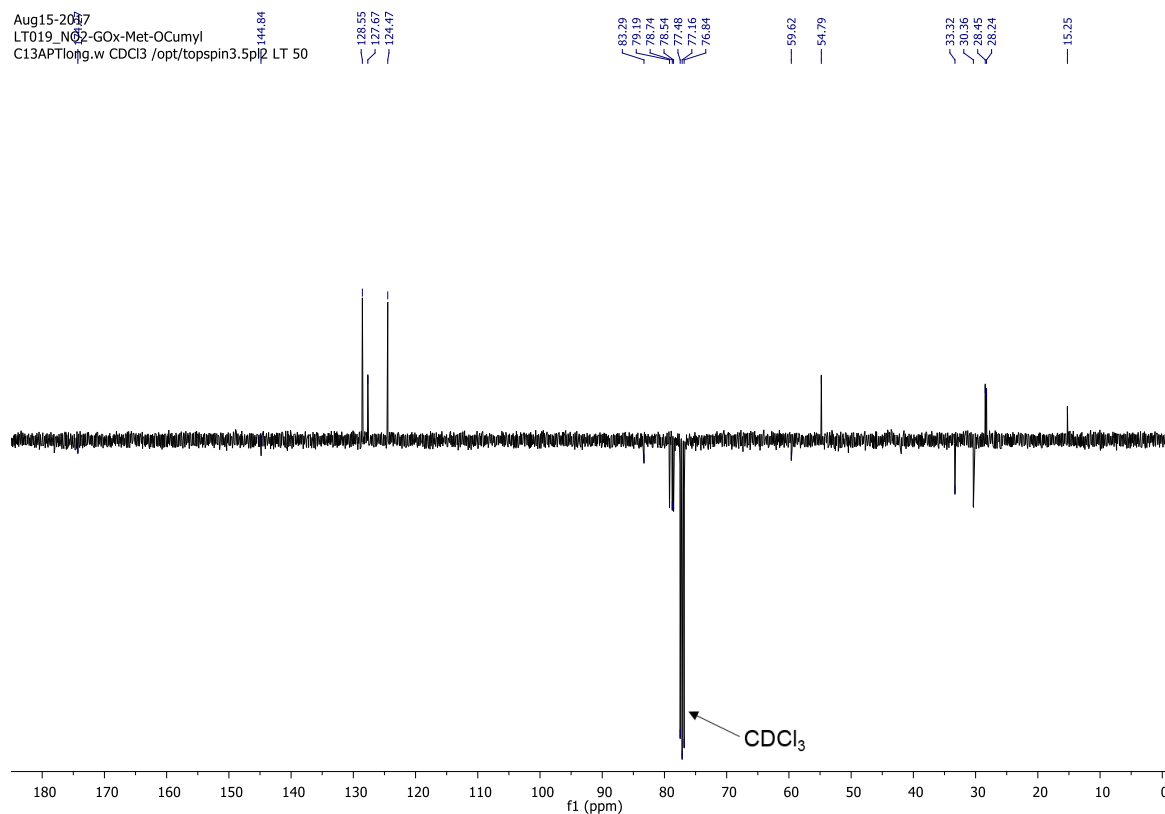

# Fmoc-GOx-Met-OCumyl (3i)

<sup>1</sup>H NMR (400 MHz, CDCl<sub>3</sub>)

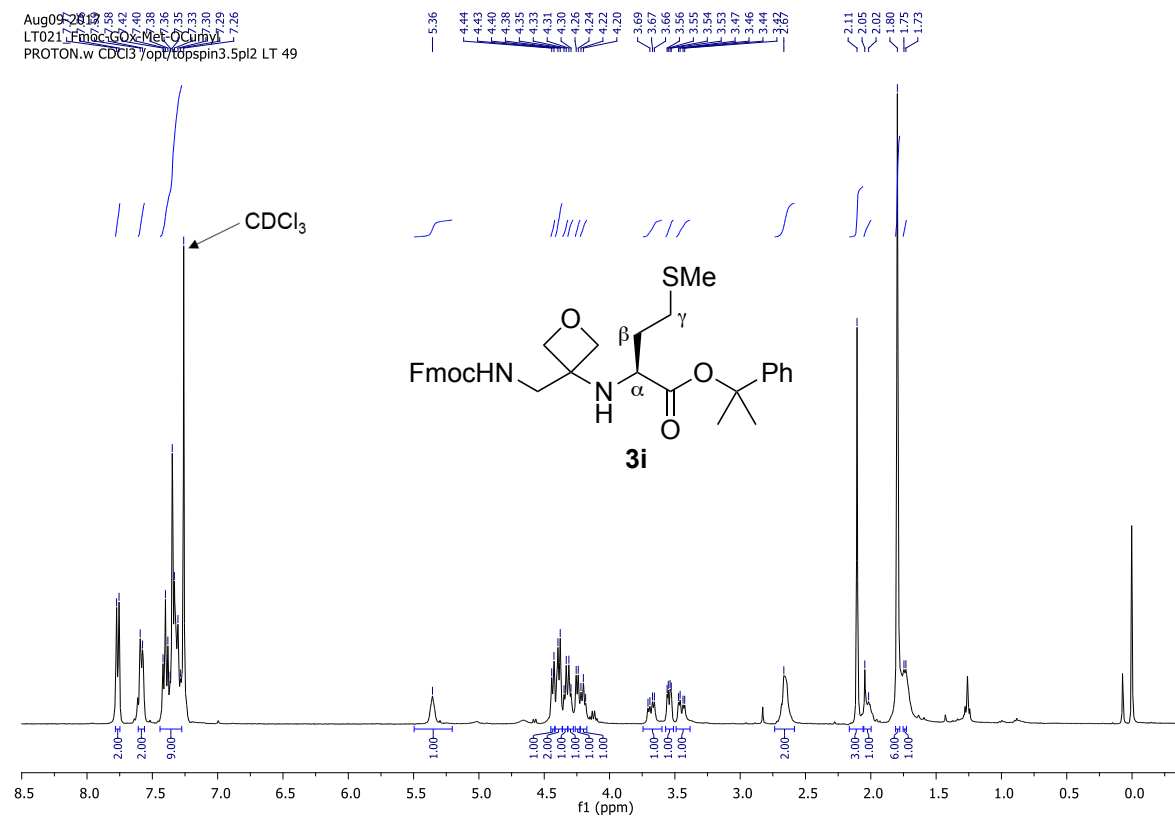

<sup>13</sup>C NMR (101 MHz, CDCl<sub>3</sub>)

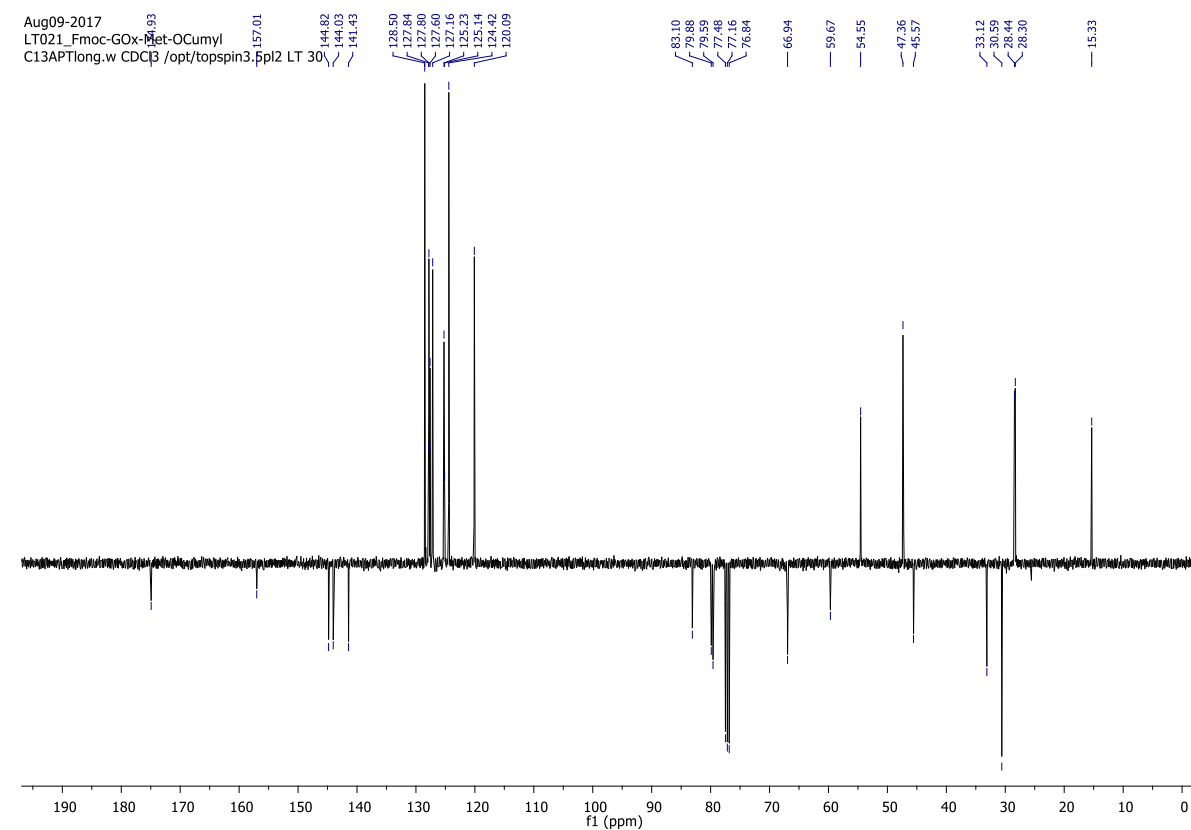

# Fmoc-His(Trt)-OCumyl (1j)

<sup>1</sup>H NMR (400 MHz, CDCl<sub>3</sub>)

Aug11-2017  
LT022\_Fmoc-His(trt)-OCumyl  
PROTON.w CDCl3 / opt/topspin3.5pl2 LT 50

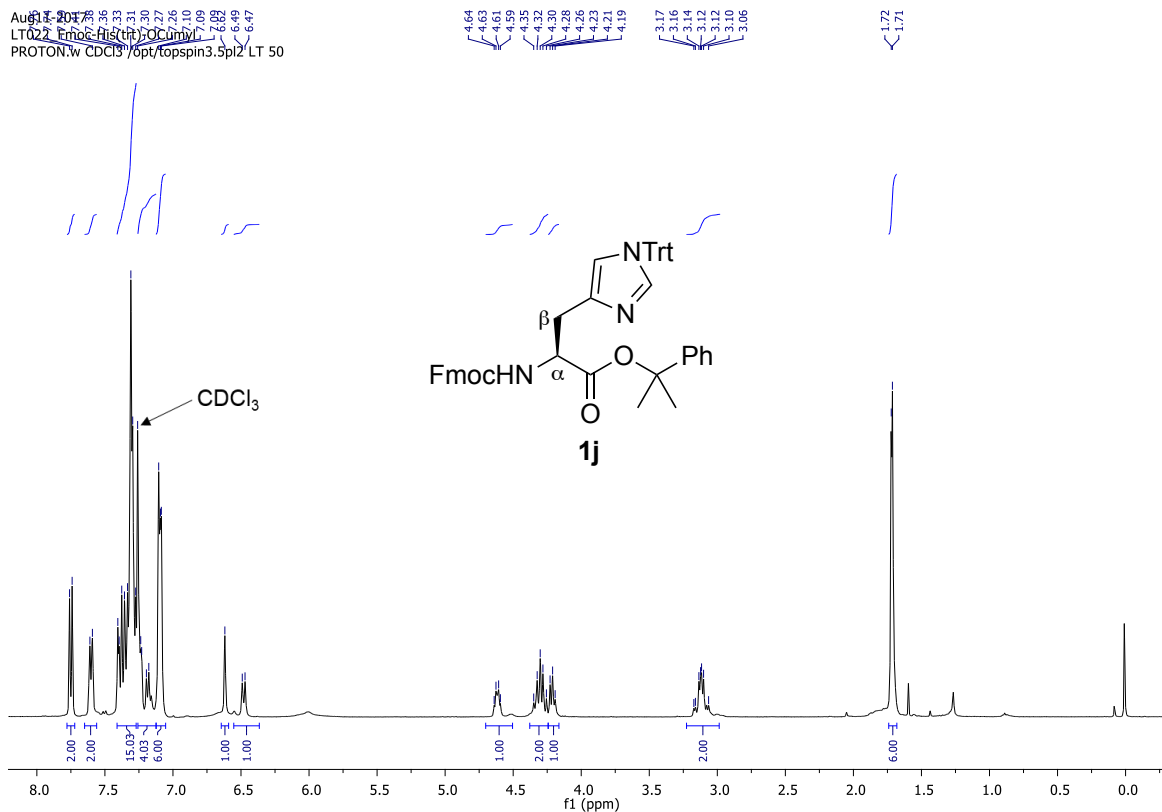

<sup>13</sup>C NMR (101 MHz, CDCl<sub>3</sub>)

Aug11-2017  
LT022\_Fmoc-His(trt)-OCumyl  
C13APTlong.w CDCl3 / opt/topspin3.5pl2 LT 50

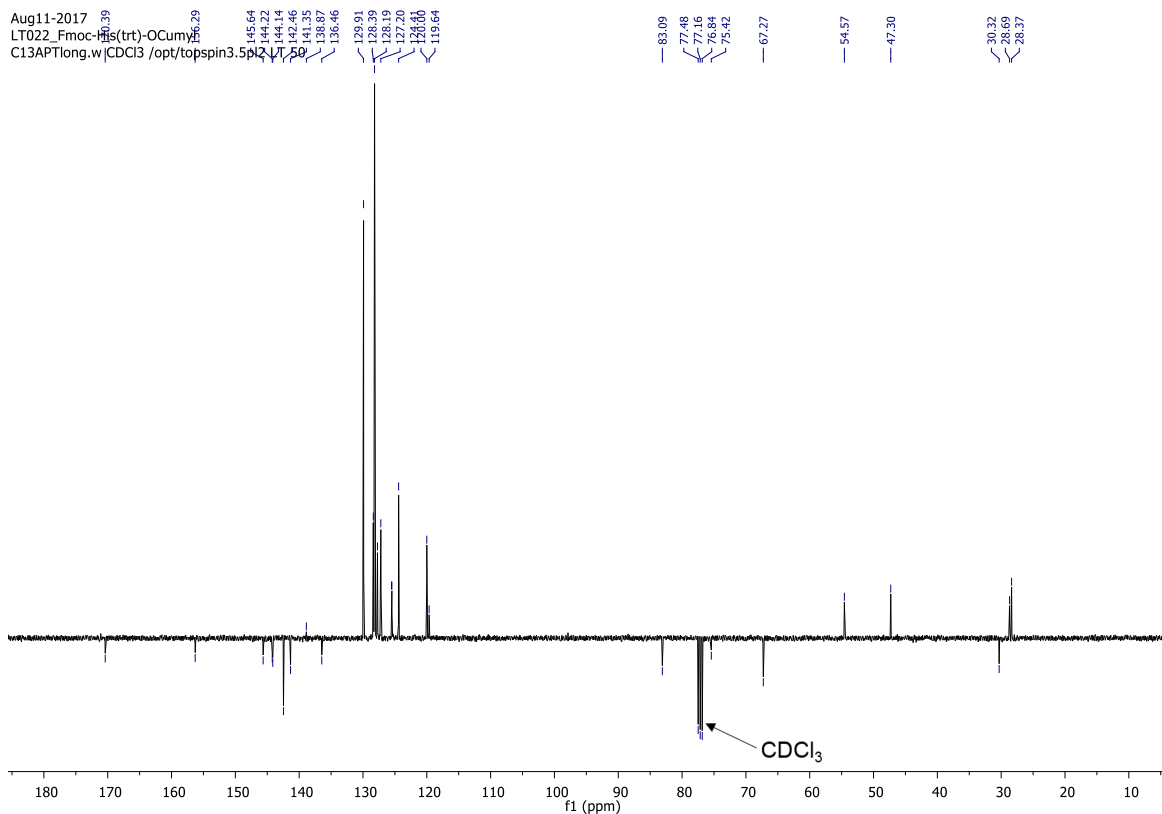

# NO<sub>2</sub>-GO<sub>x</sub>-His(Trt)-OCumyl (2j)

<sup>1</sup>H NMR (400 MHz, CDCl<sub>3</sub>)

Aug17-2017 17:50  
LT025\_NO2-GO<sub>x</sub>-His(Trt)-OCumyl  
PROTON.w CDCl<sub>3</sub> /opt/topspin3.5pl2 LT 50

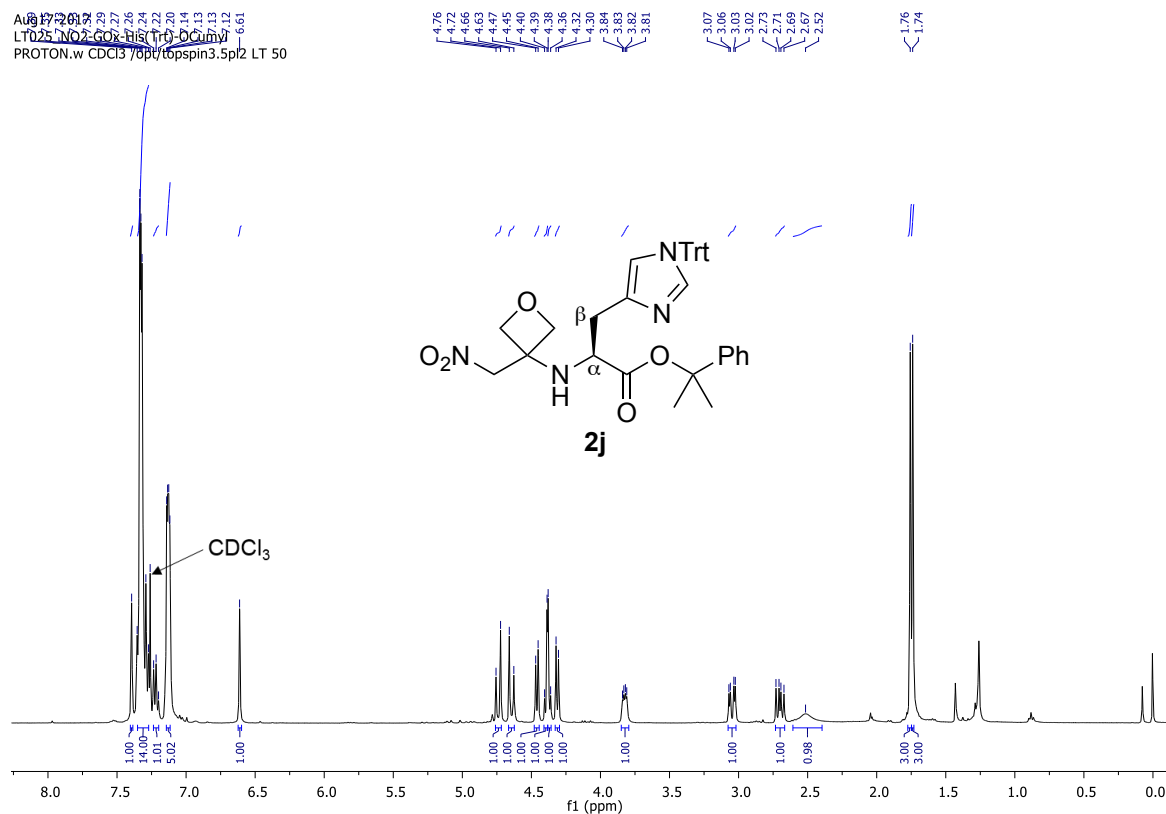

<sup>13</sup>C NMR (101 MHz, CDCl<sub>3</sub>)

Aug17-2017 17:50  
LT025\_NO2-GO<sub>x</sub>-His(Trt)-OCumyl  
C13APTlong.w CDCl<sub>3</sub> /opt/topspin3.5pl2 LT 50

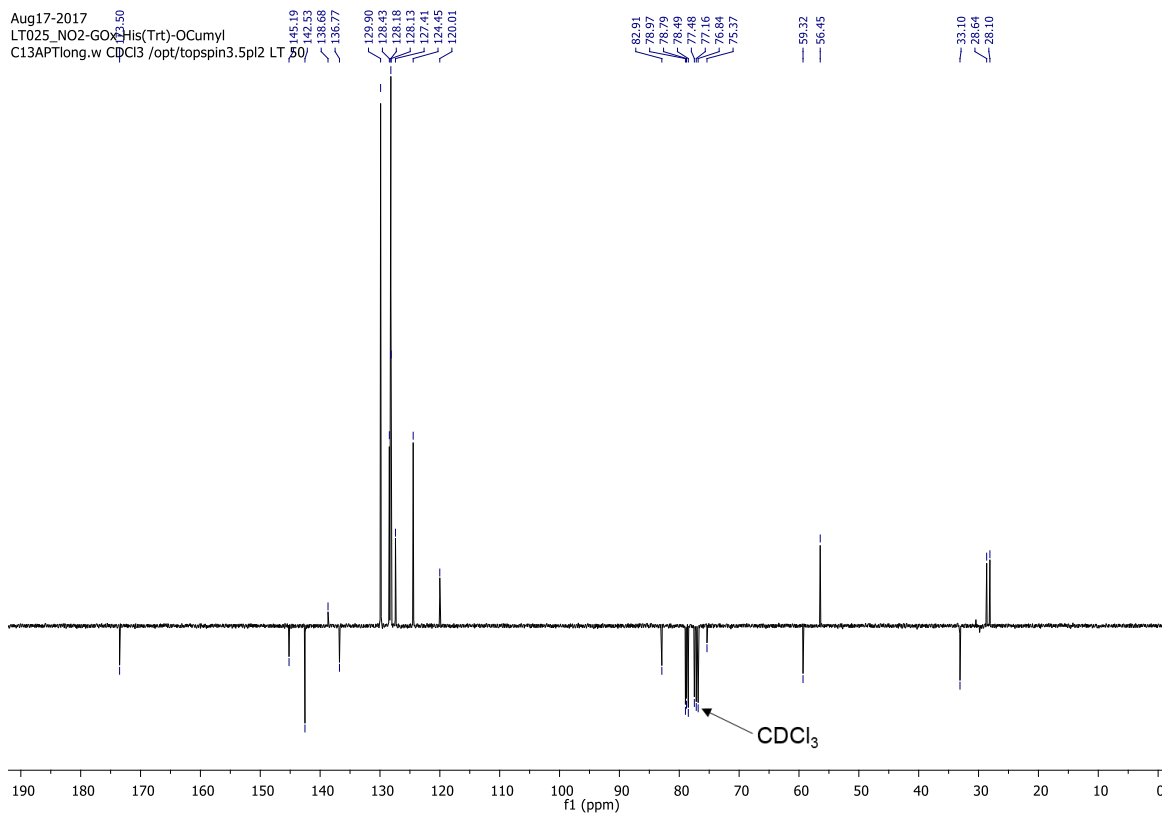

# Fmoc-GOx-His(Trt)-OCumyl (3j)

<sup>1</sup>H NMR (400 MHz, CDCl<sub>3</sub>)

Aug21-2017  
LT028\_Fmoc-GOx-His(Trt)-OCumyl  
PROTON.w CDCl3 /opt/topspin3.5pl2 LT 50

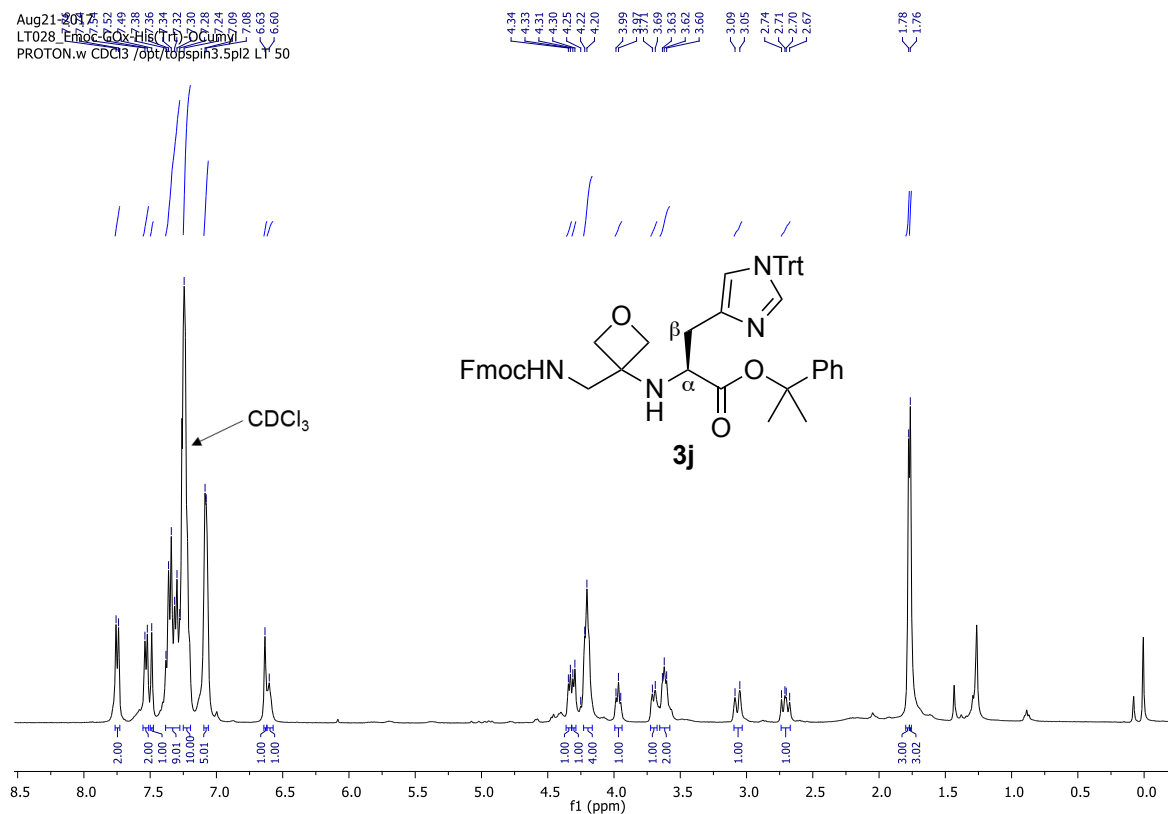

<sup>13</sup>C NMR (101 MHz, CDCl<sub>3</sub>)

Aug21-2017  
LT028\_Fmoc-GOx-His(Trt)-OCumyl  
C13APTlong.w CDCl3 /opt/topspin3.5pl2 LT 50

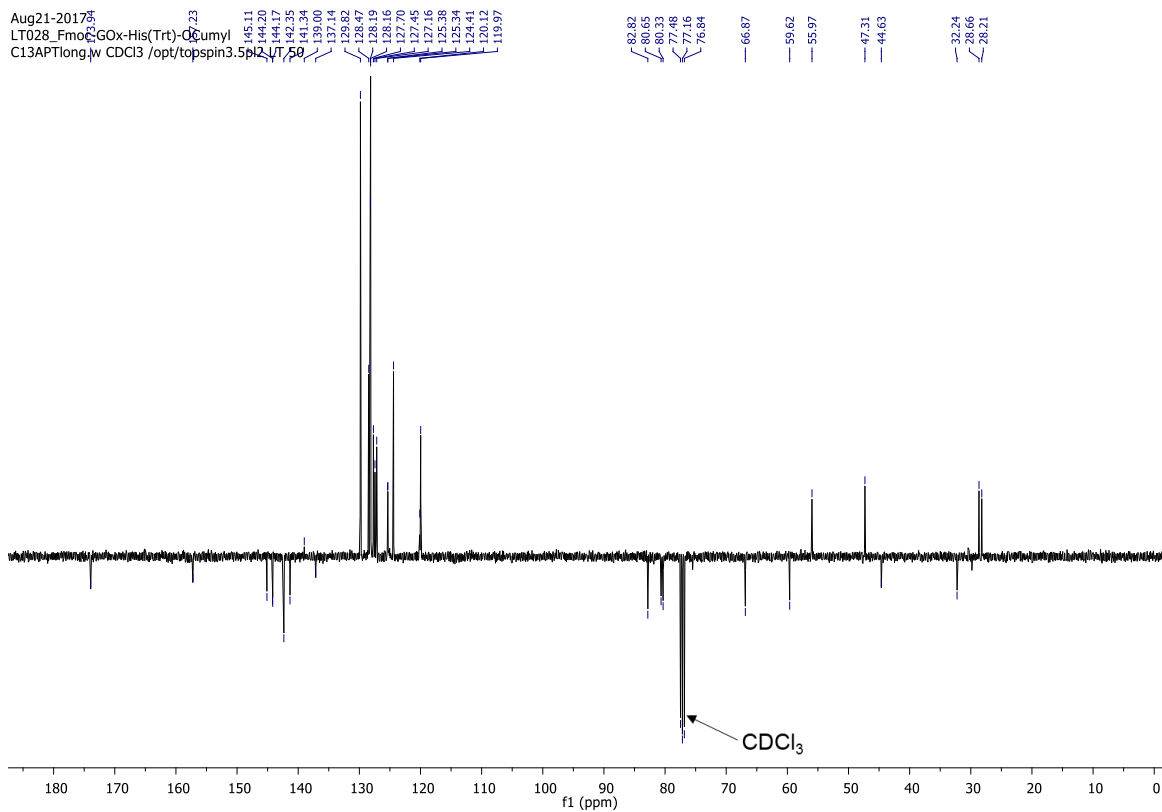



# NO<sub>2</sub>-GOx-Ser(Trt)-OBn (2k)

<sup>1</sup>H-NMR (400 MHz, CDCl<sub>3</sub>)

Jan14-2019  
SR381  
PROTON.w CDCl3 /opt/topspin3.5pl2 SR1 50

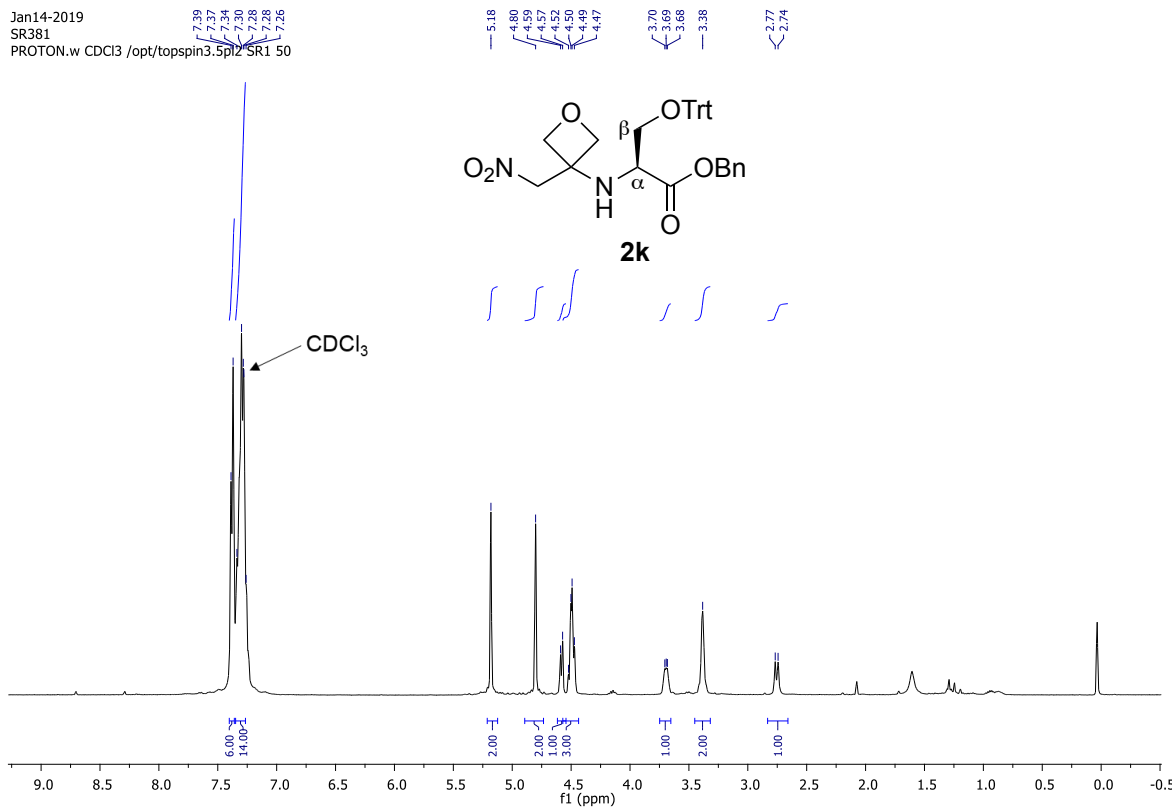

<sup>13</sup>C-NMR (126 MHz, CDCl<sub>3</sub>)

Jan16-2019  
Chemist Stefan Roesner  
SR381  
C13APT.w CDCl3 /opt/topspin3.2 SR1 41

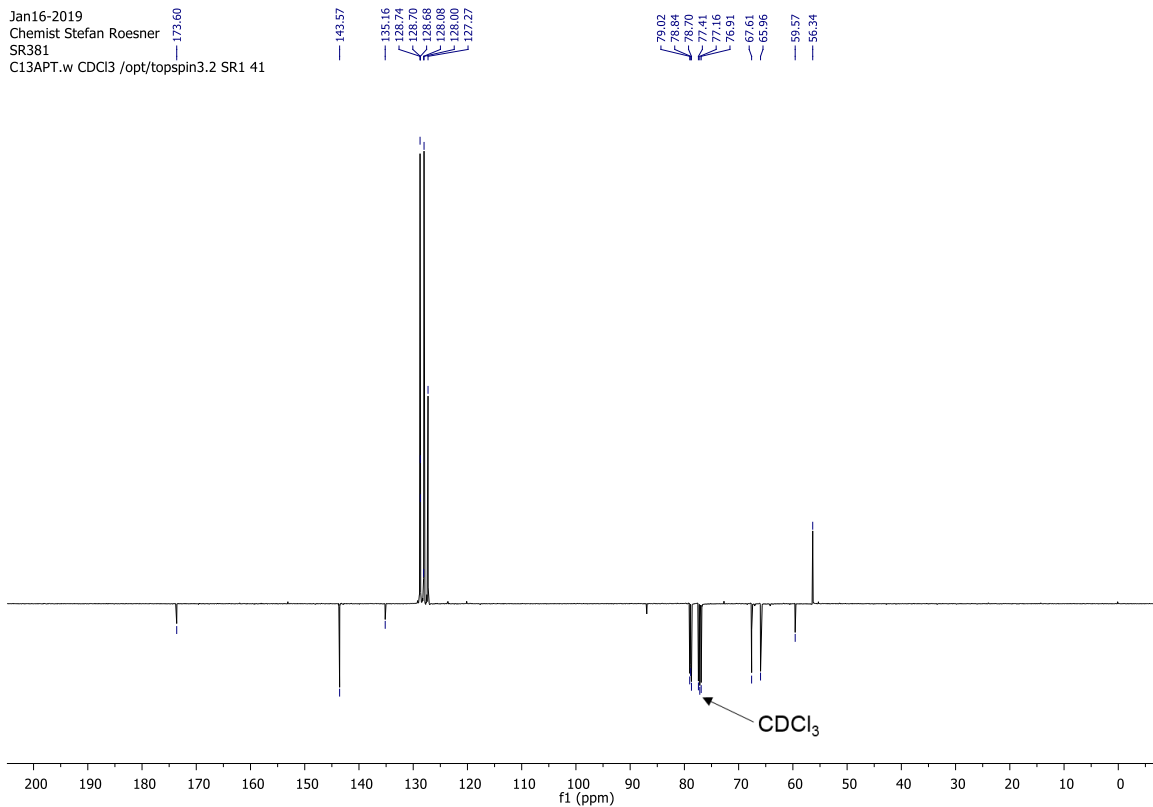

# Fmoc-GOx-Ser(Trt)-OBn (3k)

<sup>1</sup>H-NMR (400 MHz, CDCl<sub>3</sub>)

Jan18-2019  
SR382  
PROTON.w CDCl3 /opt/topspin3.5pl2 SR1 16

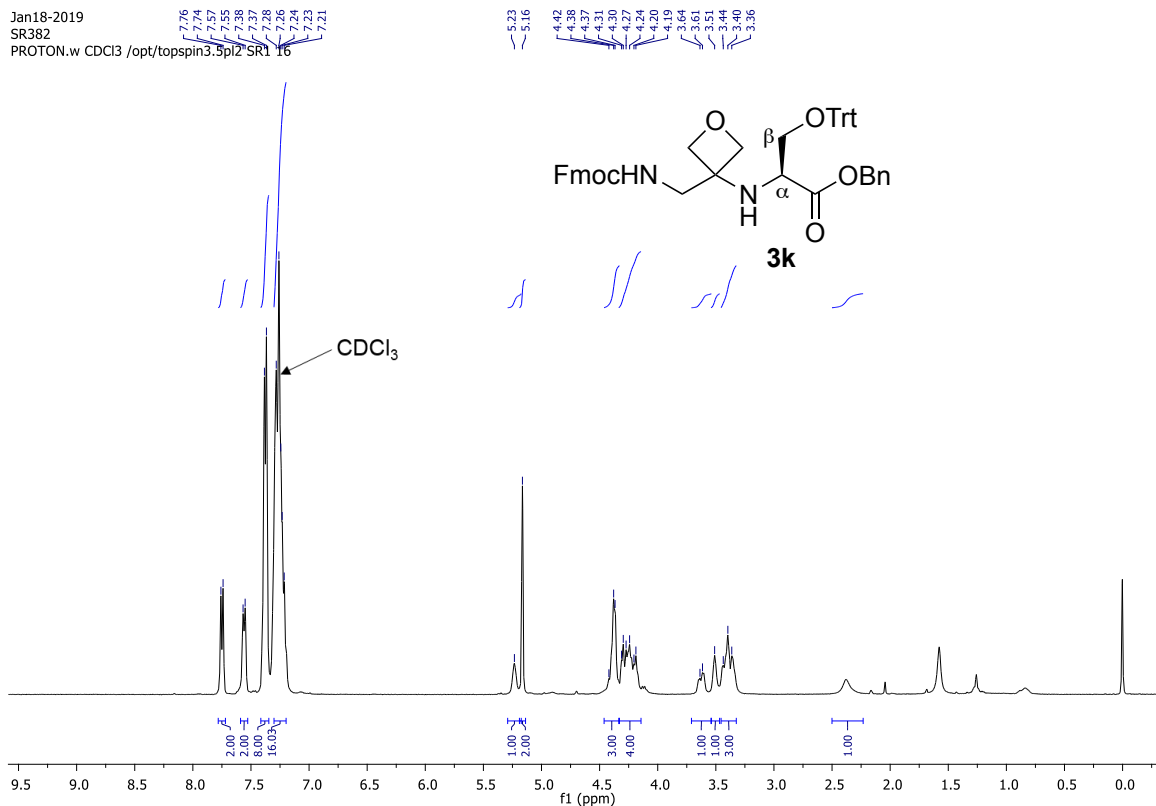

<sup>13</sup>C-NMR (126 MHz, CDCl<sub>3</sub>)

Jan17-2019  
Chemist Stefan Roesner  
SR382  
C13APT.w CDCl3 /opt/topspin3.2 SR1 46

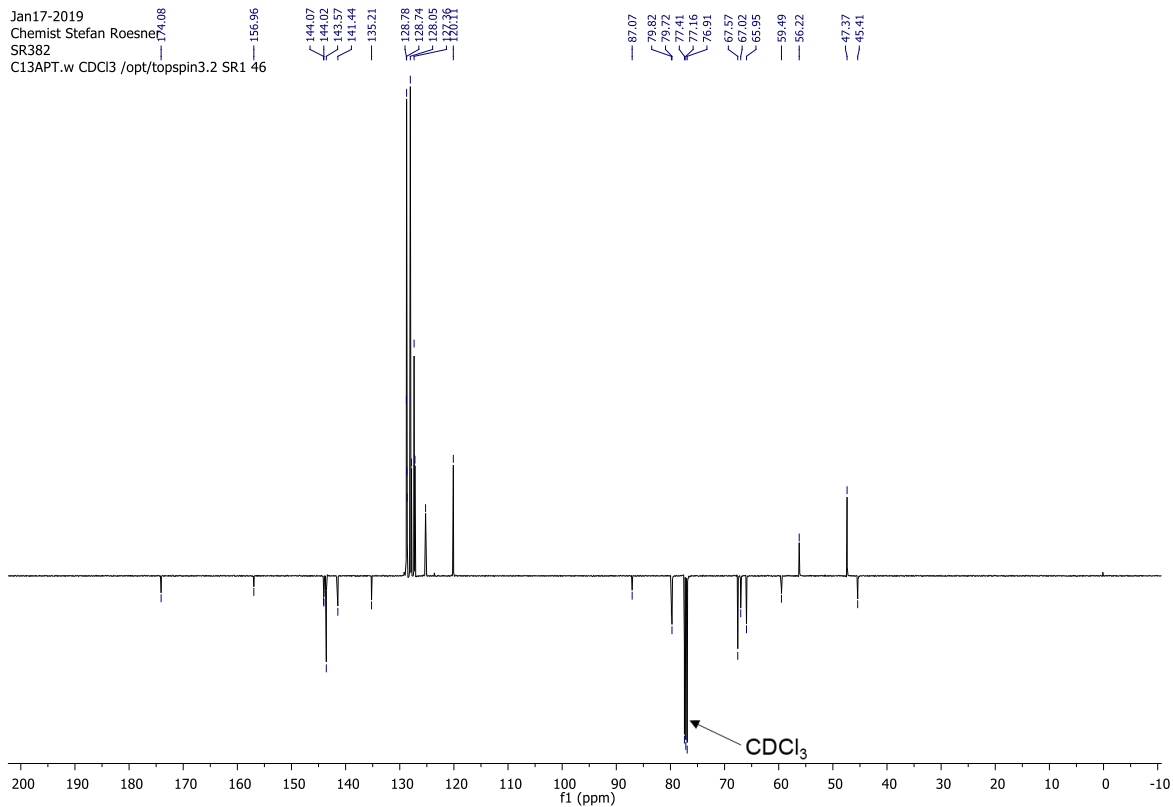

# NO<sub>2</sub>-GOx-Thr(Trt)-OBn (2I)

<sup>1</sup>H NMR (400 MHz, CDCl<sub>3</sub>)

Dec13-2018  
SR373  
PROTON.w CDCl3 /opt/topspin3.5/pl2 SR1 35

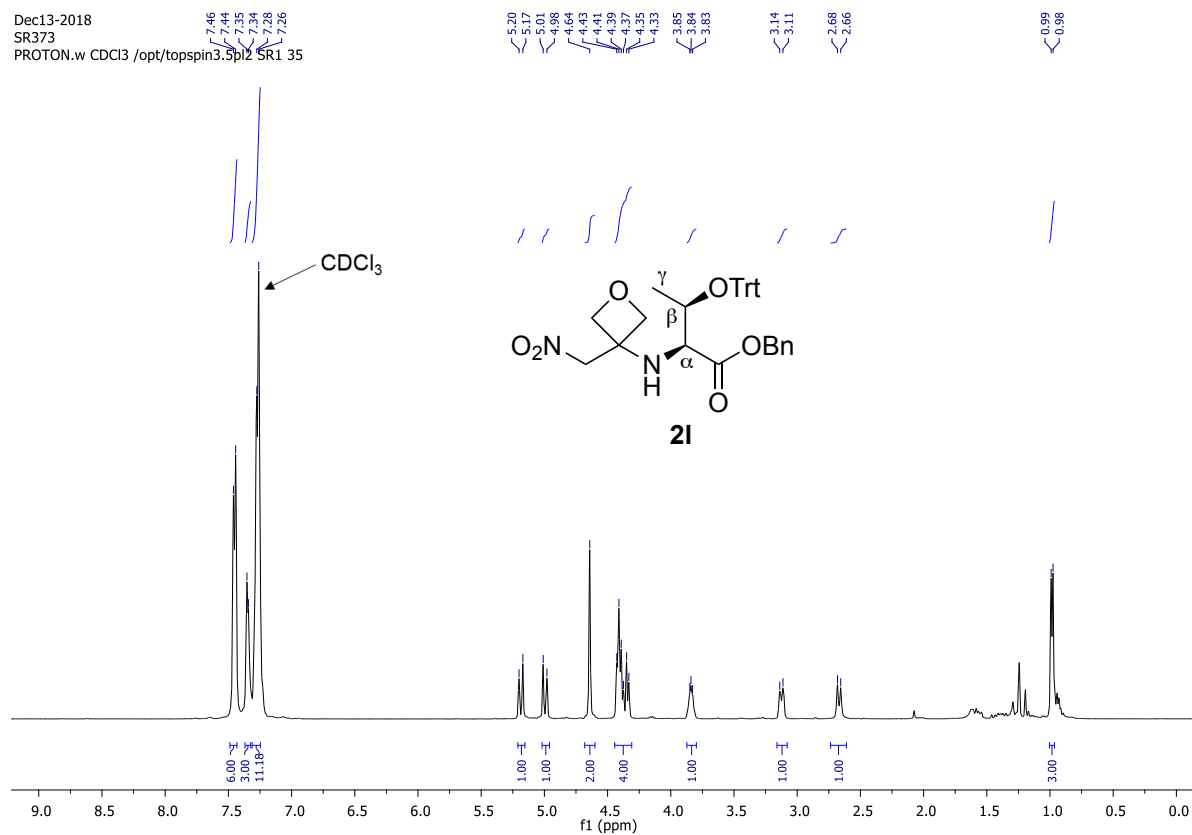

<sup>13</sup>C NMR (126 MHz, CDCl<sub>3</sub>)

Jan09-2019  
Chemist Stefan Roesner  
SR373  
C13APT.w CDCl3 /opt/topspin3.2 SR1 22

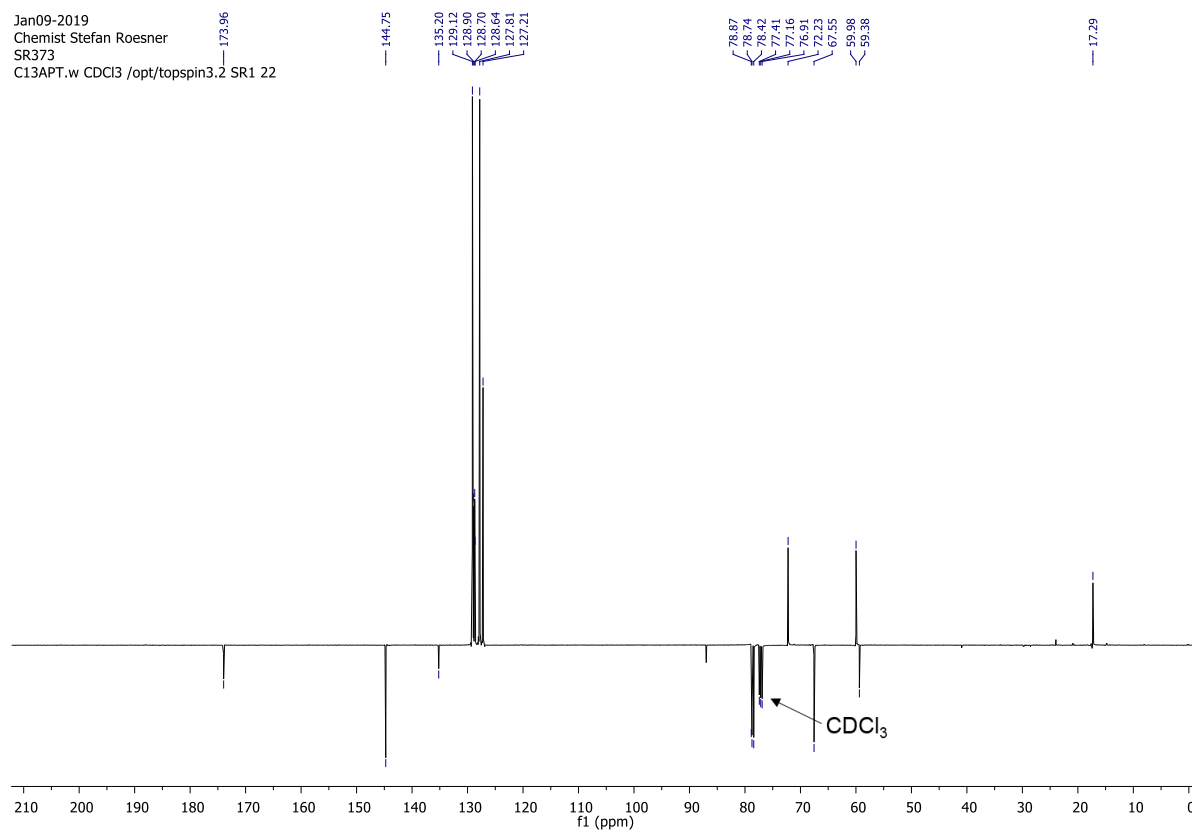

# Fmoc-GOx-Thr(Trt)-OBn (3I)

<sup>1</sup>H NMR (400 MHz, CDCl<sub>3</sub>)

Dec14-2018  
SR375  
PROTON.w CDCl3 /opt/topspin3.5pl2 SR1 2

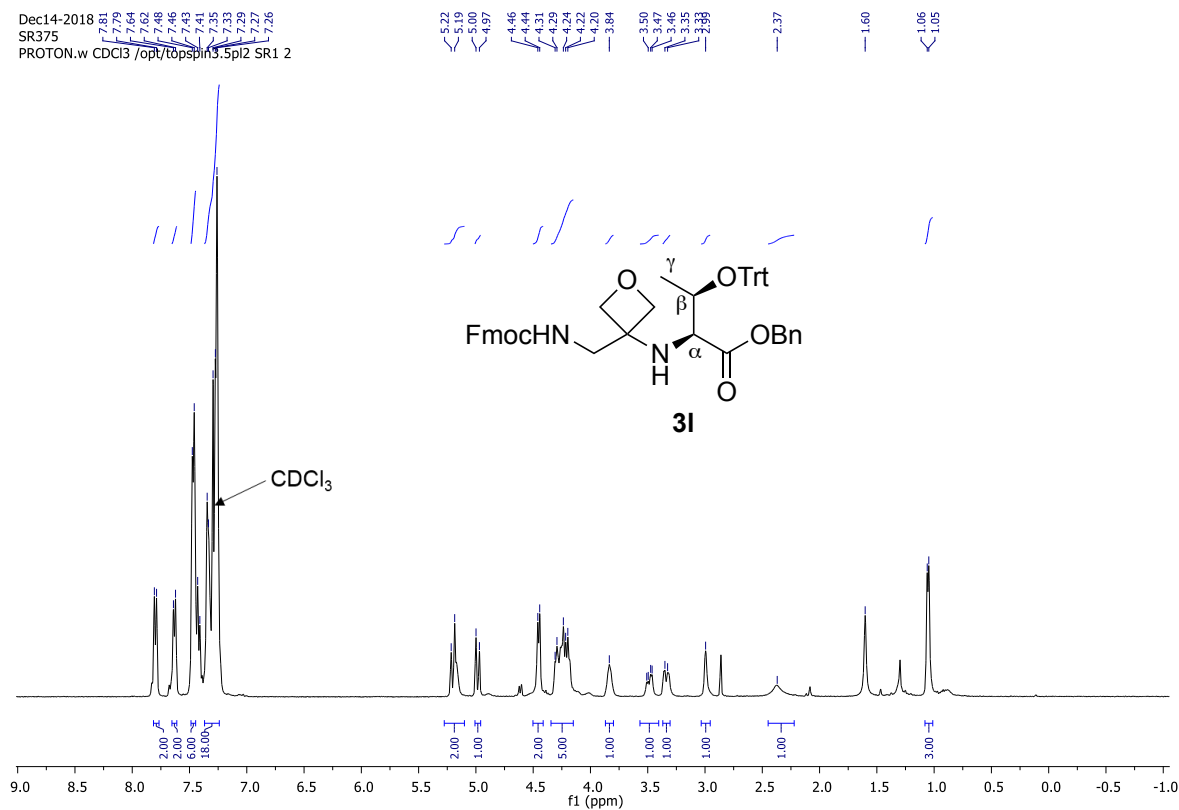

<sup>13</sup>C NMR (126 MHz, CDCl<sub>3</sub>)

Jan09-2019  
Chemist Stefan Roesner  
SR375  
C13APT.w CDCl3 /opt/topspin3.2 SR1 24

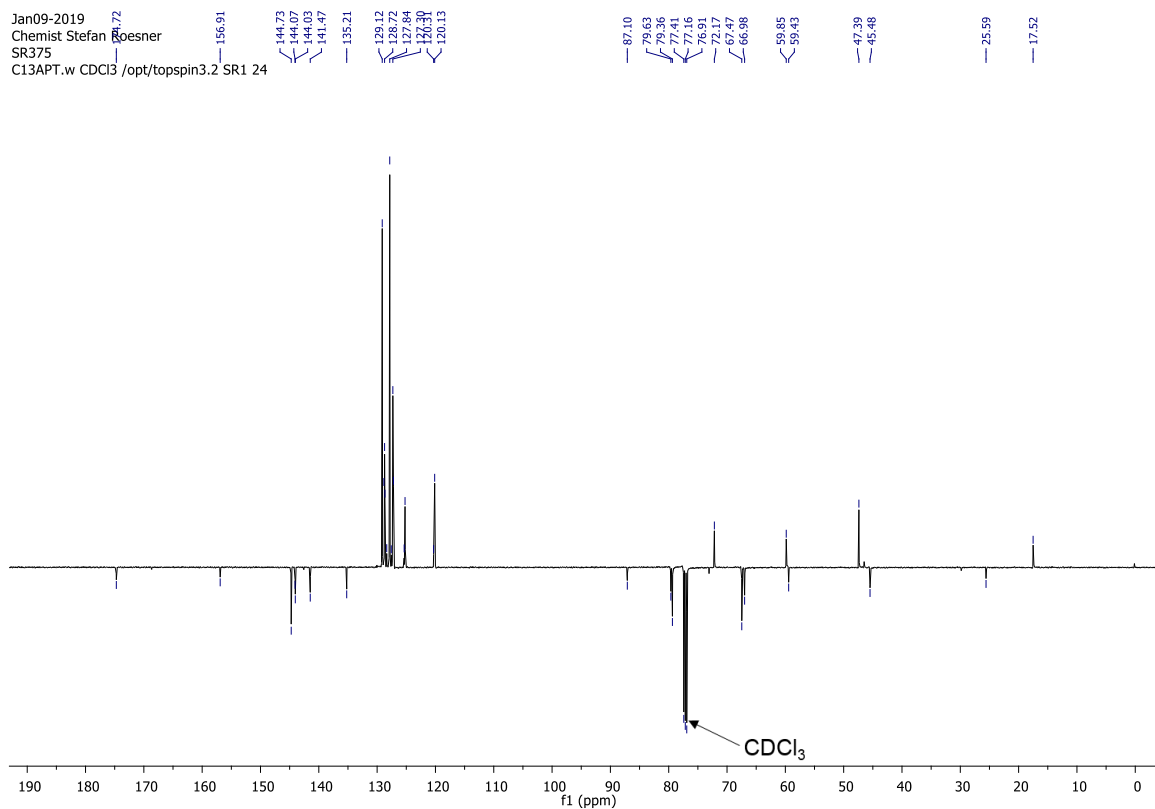

# NO<sub>2</sub>-GOx-His(Trt)-OBn (2m)

<sup>1</sup>H NMR (400 MHz, CDCl<sub>3</sub>)

Dec14-2018  
SR374  
PROTON.w CDCl3 /opt/topspin3.5plz SR1 1

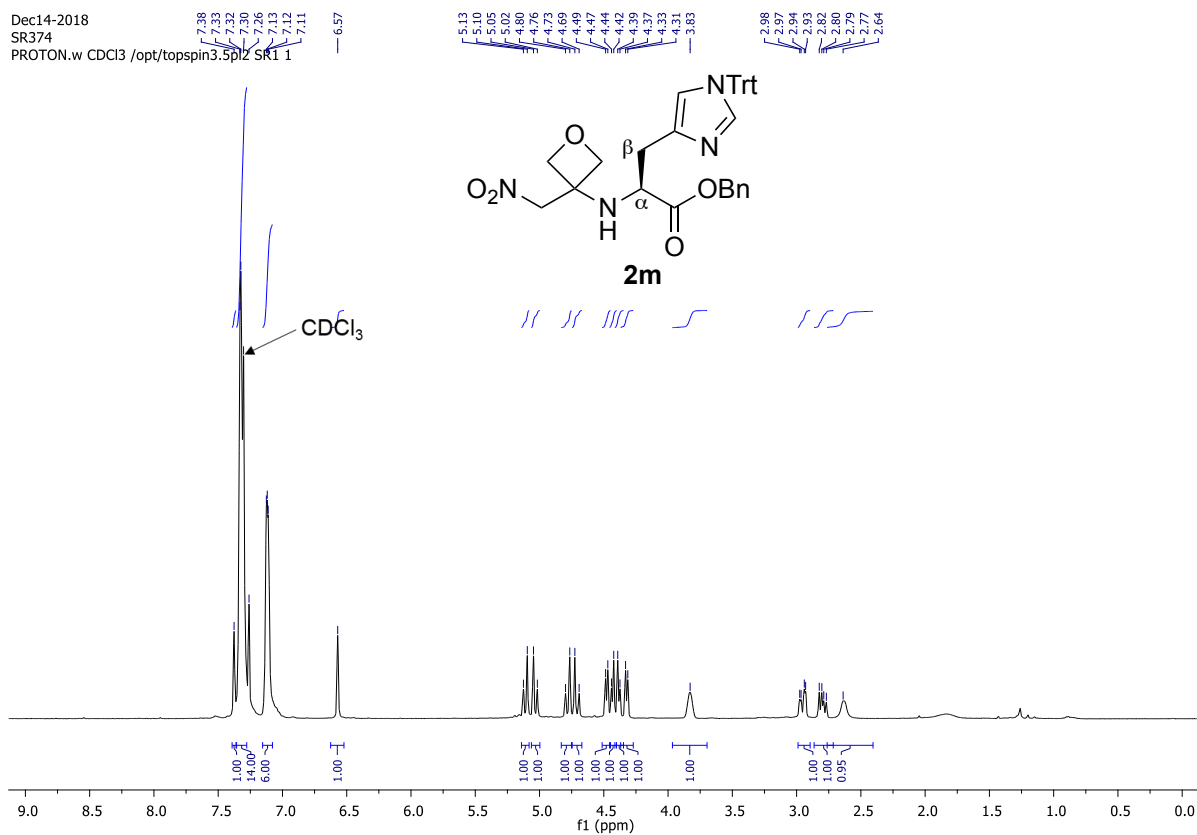

<sup>13</sup>C NMR (126 MHz, CDCl<sub>3</sub>)

Jan09-2019  
Chemist Stefan Roesner  
SR374  
C13APT.w CDCl3 /opt/topspin3.2 SR1 23

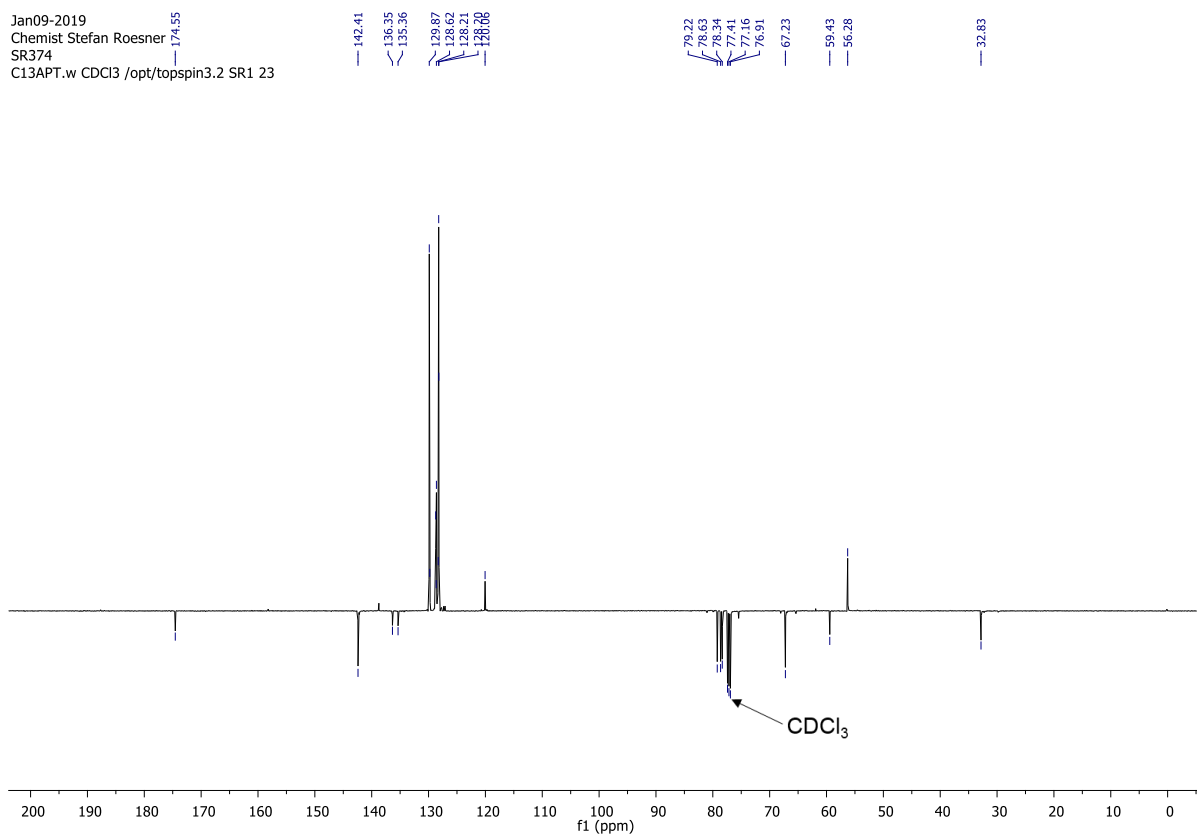

# Fmoc-GOx-His(Trt)-OBn (3m)

<sup>1</sup>H NMR (400 MHz, CDCl<sub>3</sub>)

Jan16-2019  
Chemist Stefan Roesner  
SR376  
PROTON.w CDCl3 /opt/topspin3.2 SR1 39

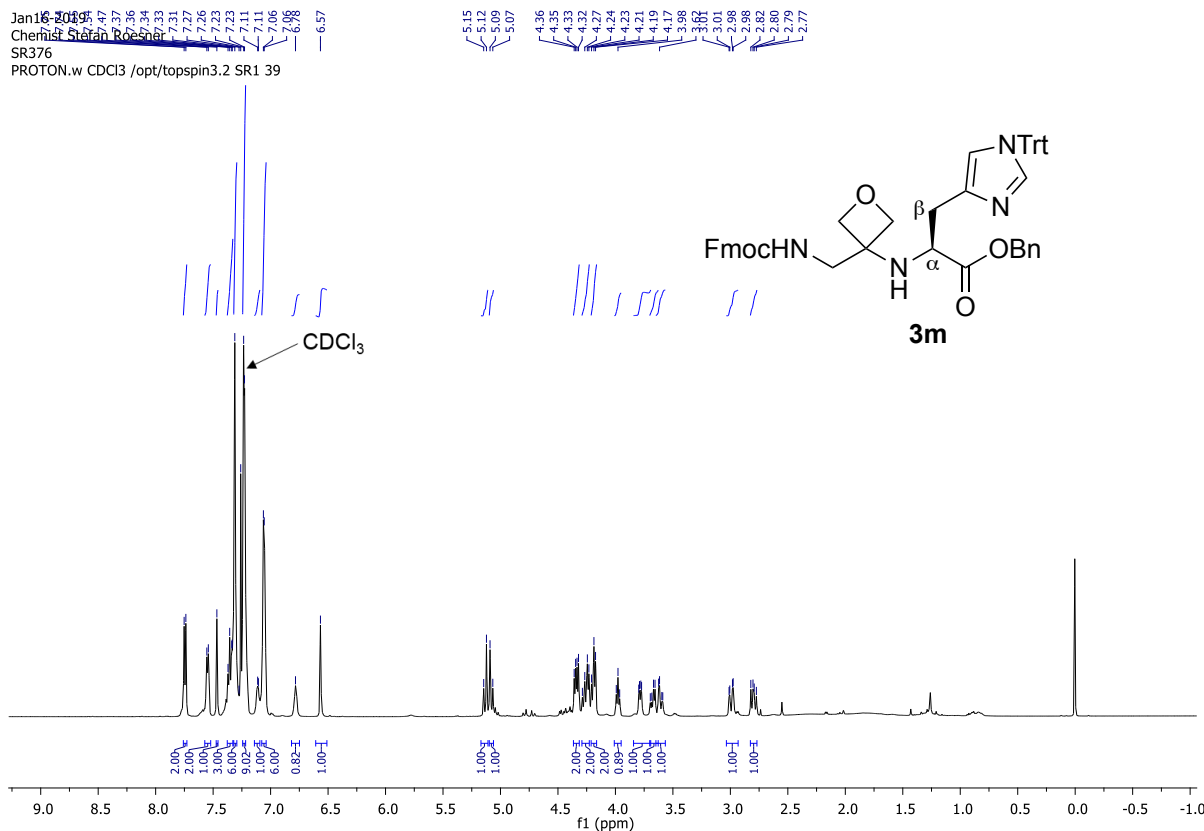

<sup>13</sup>C NMR (126 MHz, CDCl<sub>3</sub>)

Jan16-2019  
Chemist Stefan Roesner  
SR376  
C13APT.w CDCl3 /opt/topspin3.2 SR1 39

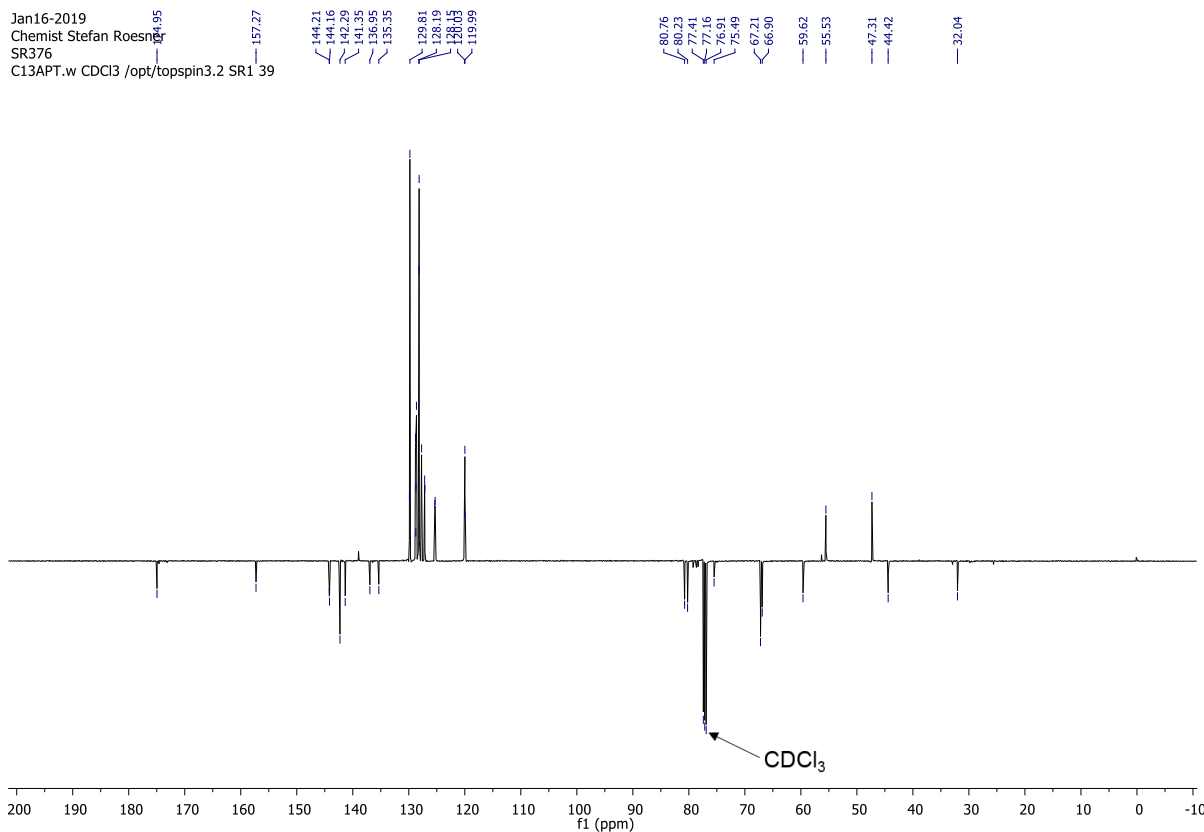

# Fmoc-GOx-Thr(Trt)-OBn (24)

<sup>1</sup>H NMR (400 MHz, CDCl<sub>3</sub>)

Jan10-2019  
SR378  
PROTON.w CDCl3 /opt/topspin3.5pl2 SR1 15

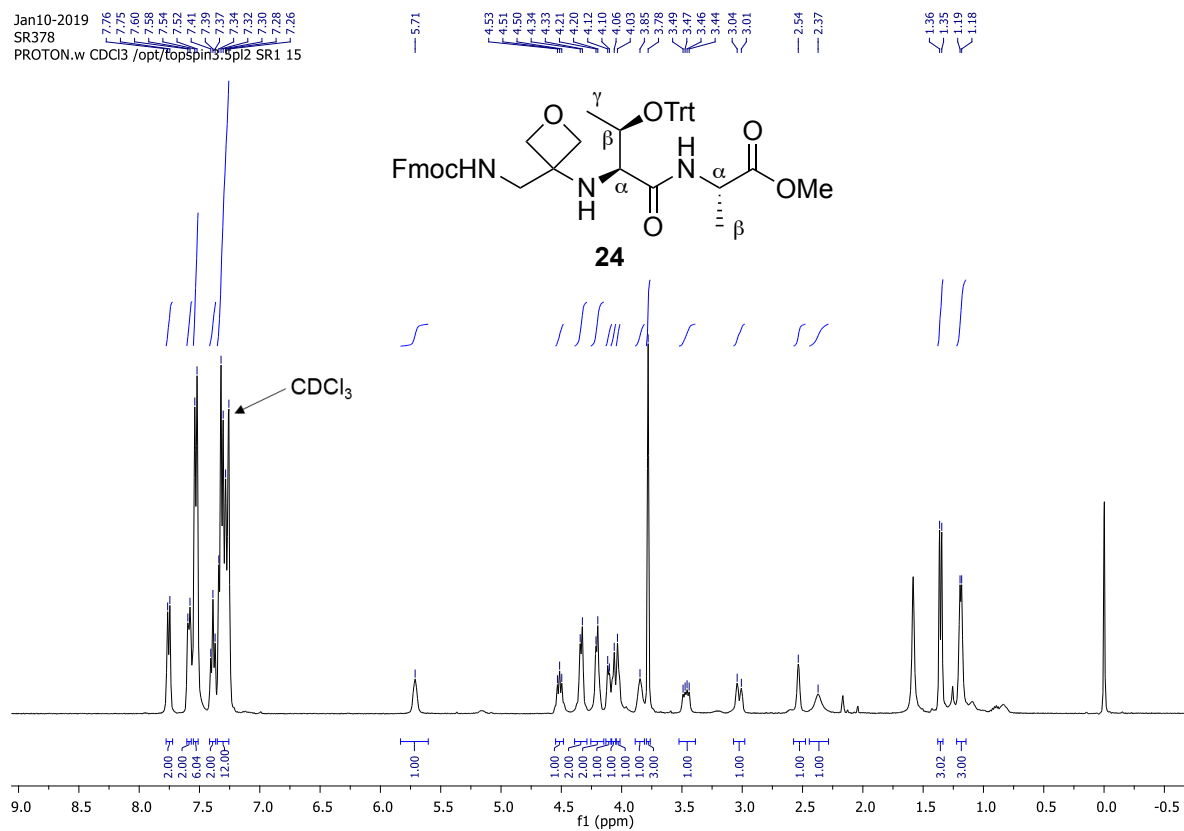

<sup>13</sup>C NMR (126 MHz, CDCl<sub>3</sub>)

Jan16-2019  
Chemist Stefan Roessner  
SR378  
C13APT.w CDCl3 /opt/topspin3.2 SR1 40

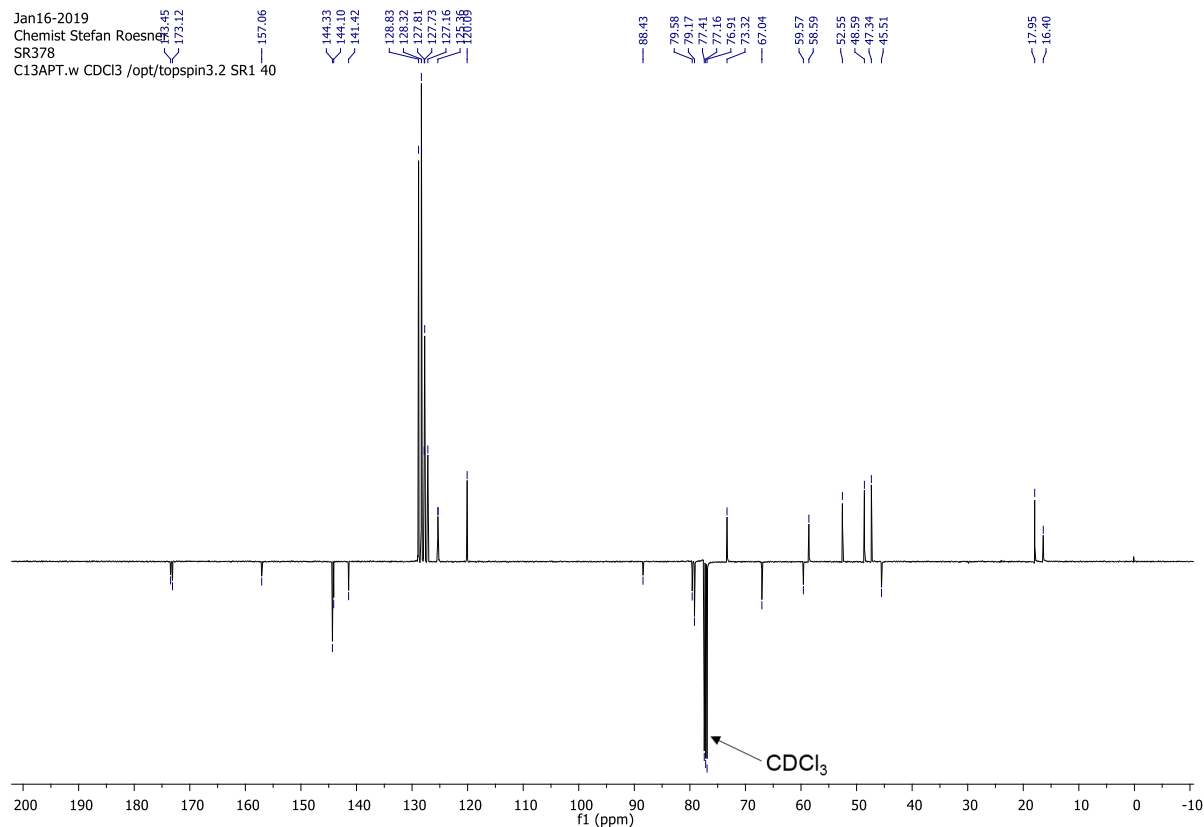

Supplement: d0ob01208d1.pdf [file d0ob01208d1.pdf]
